# Supplementary material
Source: publisher site journal article supplement (https://www.dovepress.com/article/405987)
Supplement: Supplementary file 1 [file get_supplementary_file.php]

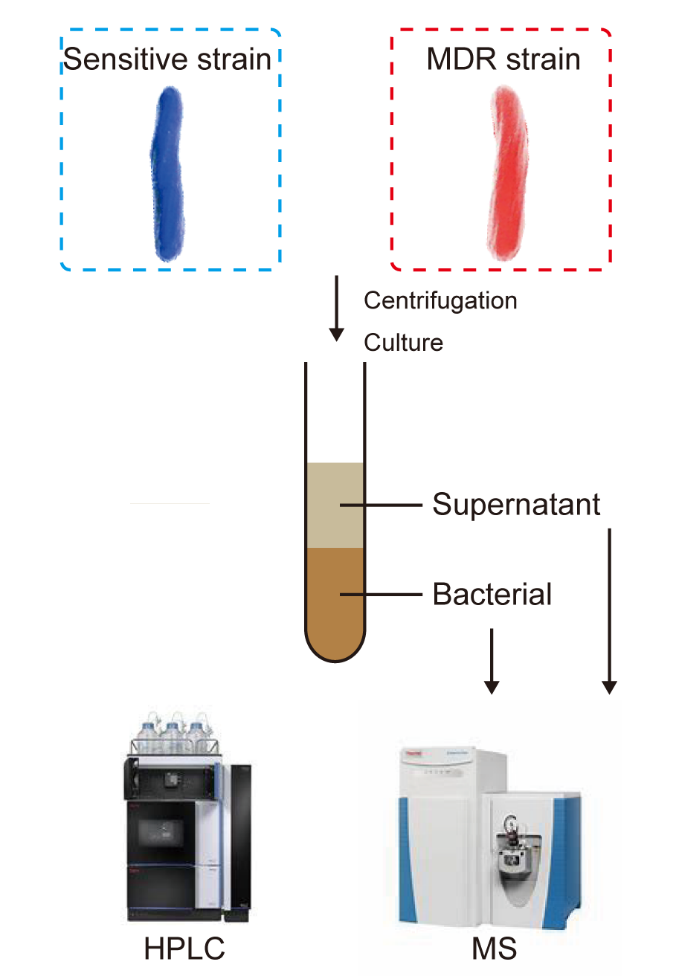


**Supplemental Figure 1** Research flowchart


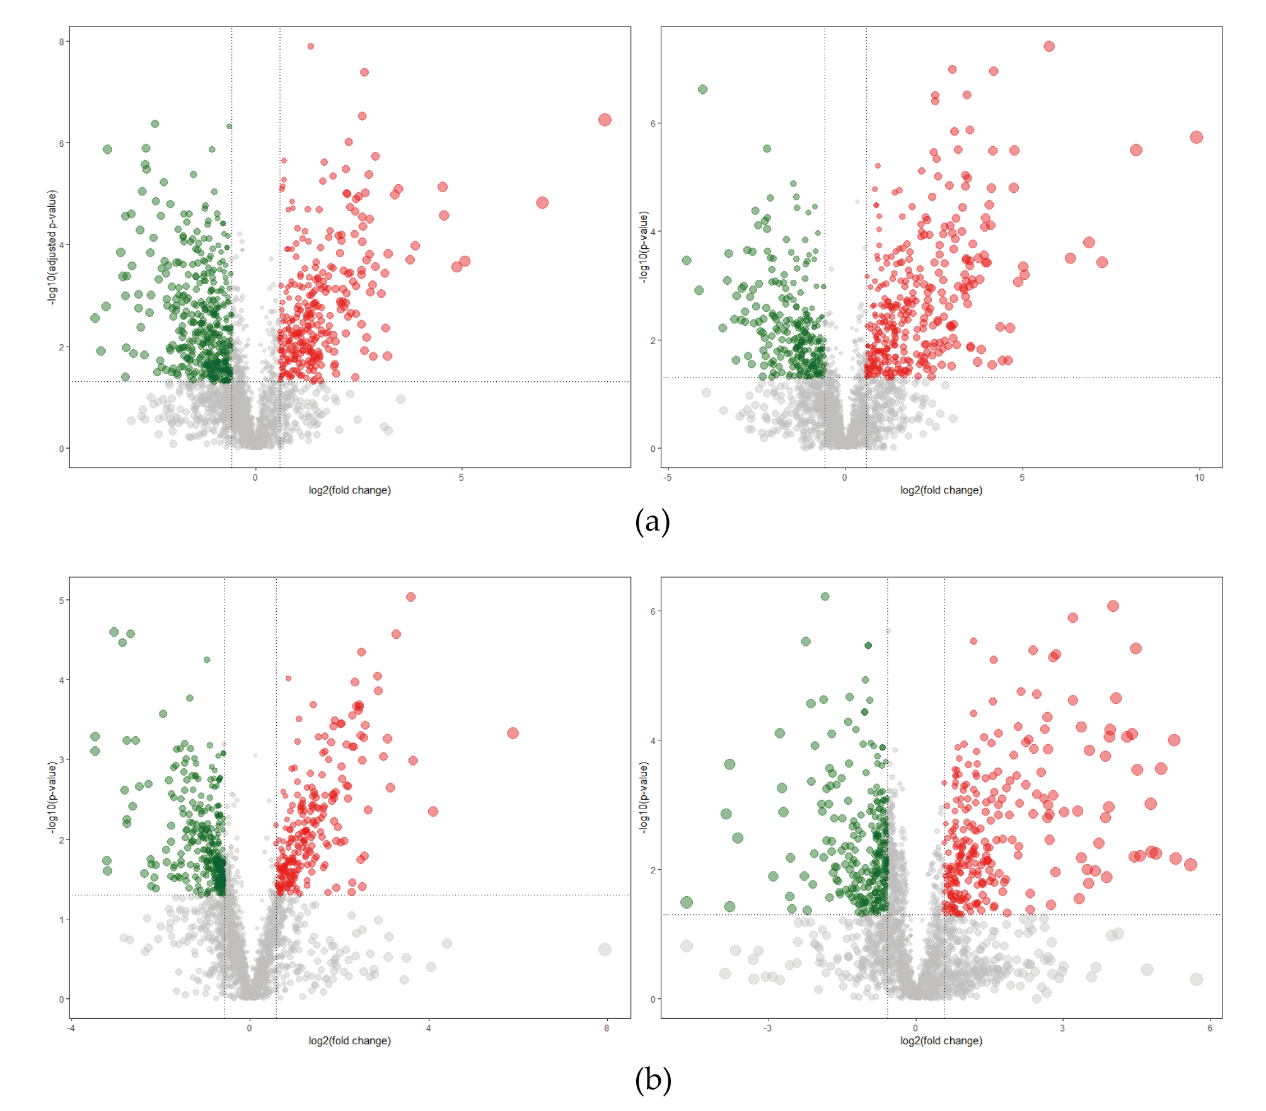


**Supplemental Figure 2** Volcano plots of metabolites. (a) Bacterial. (b) Cultured supernatant. The red dots represent the up-regulated metabolites, and the green dots represent the down-regulated metabolites. The size of the dots represents the log2(fold-change) value.


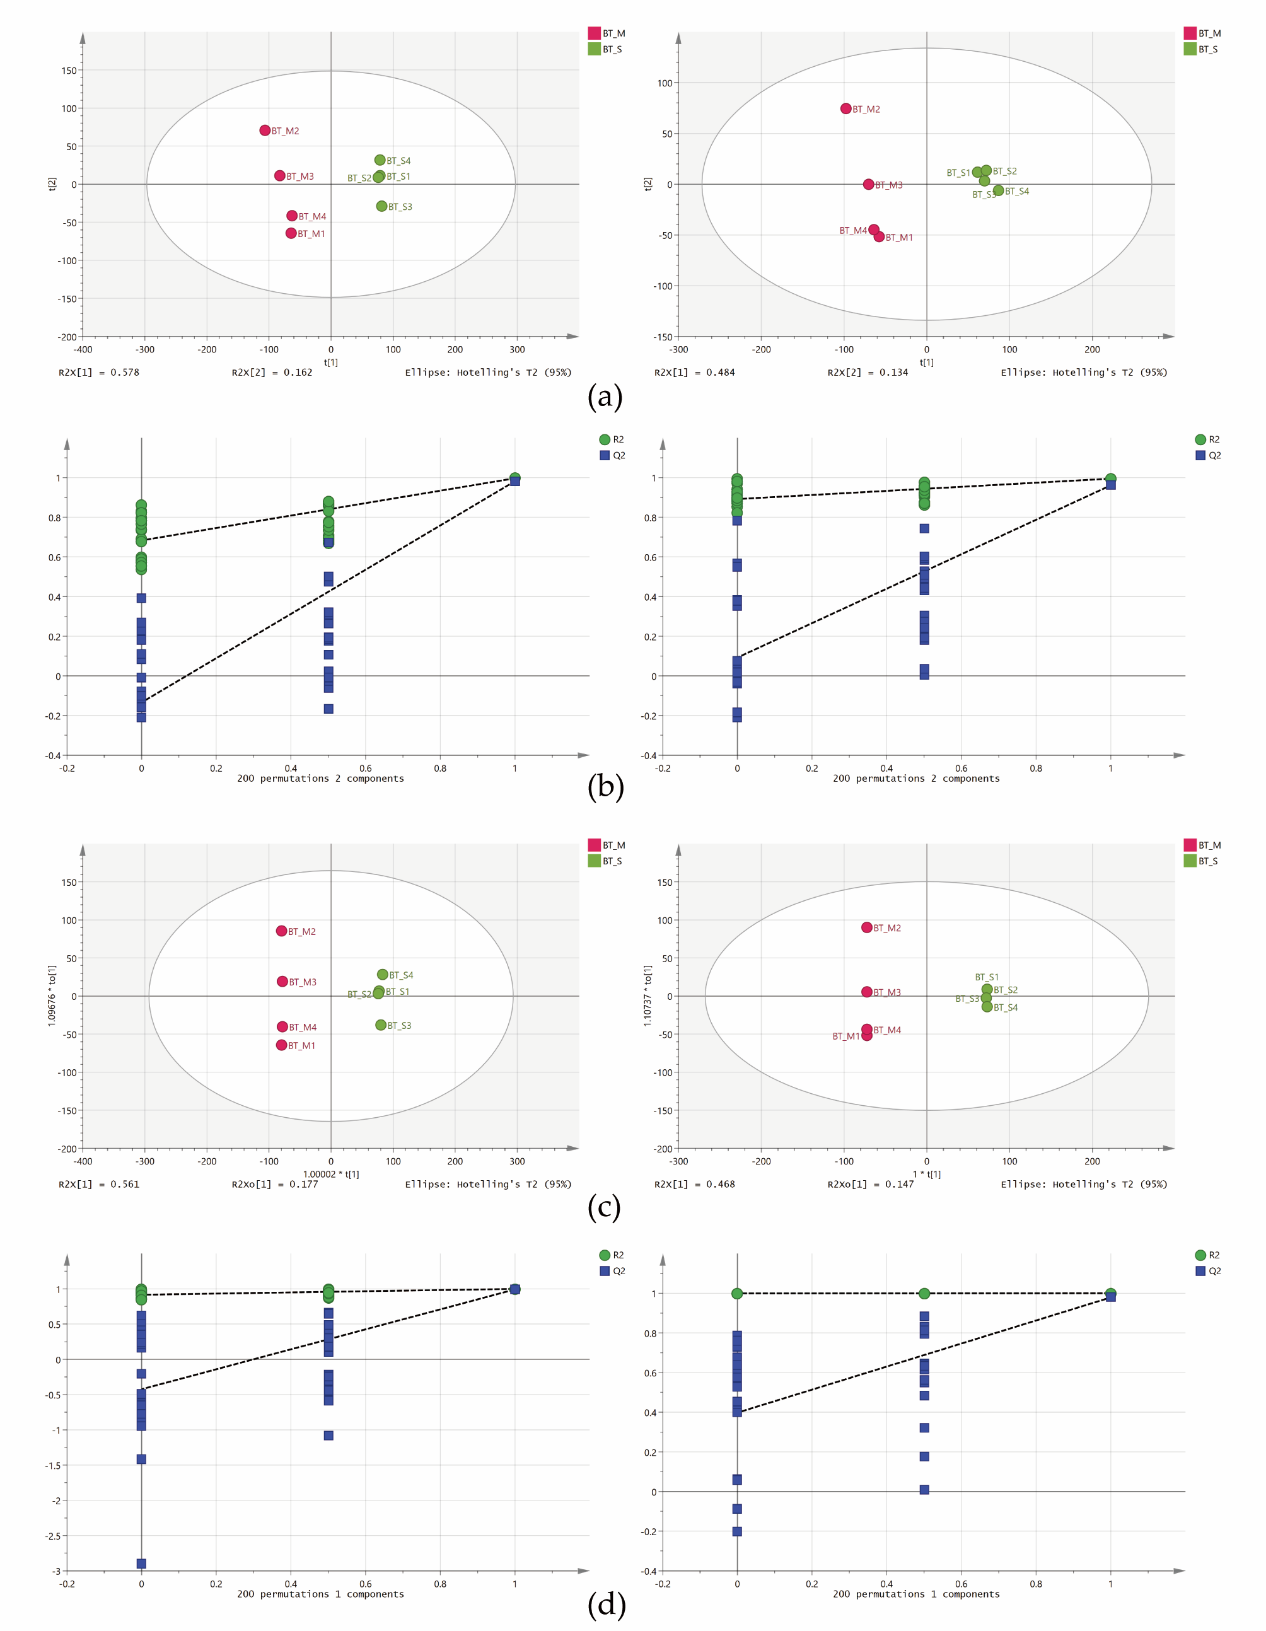


**Supplemental Figure 3** Multivariate analysis of bacteria differential metabolites. (a) PLS-DA-score scatter plots, (b) PLS-DA-permutations, (c) OPLS-DA-score scatter plots, and (d) OPLS-DA-permutations in the positive and negative mod.


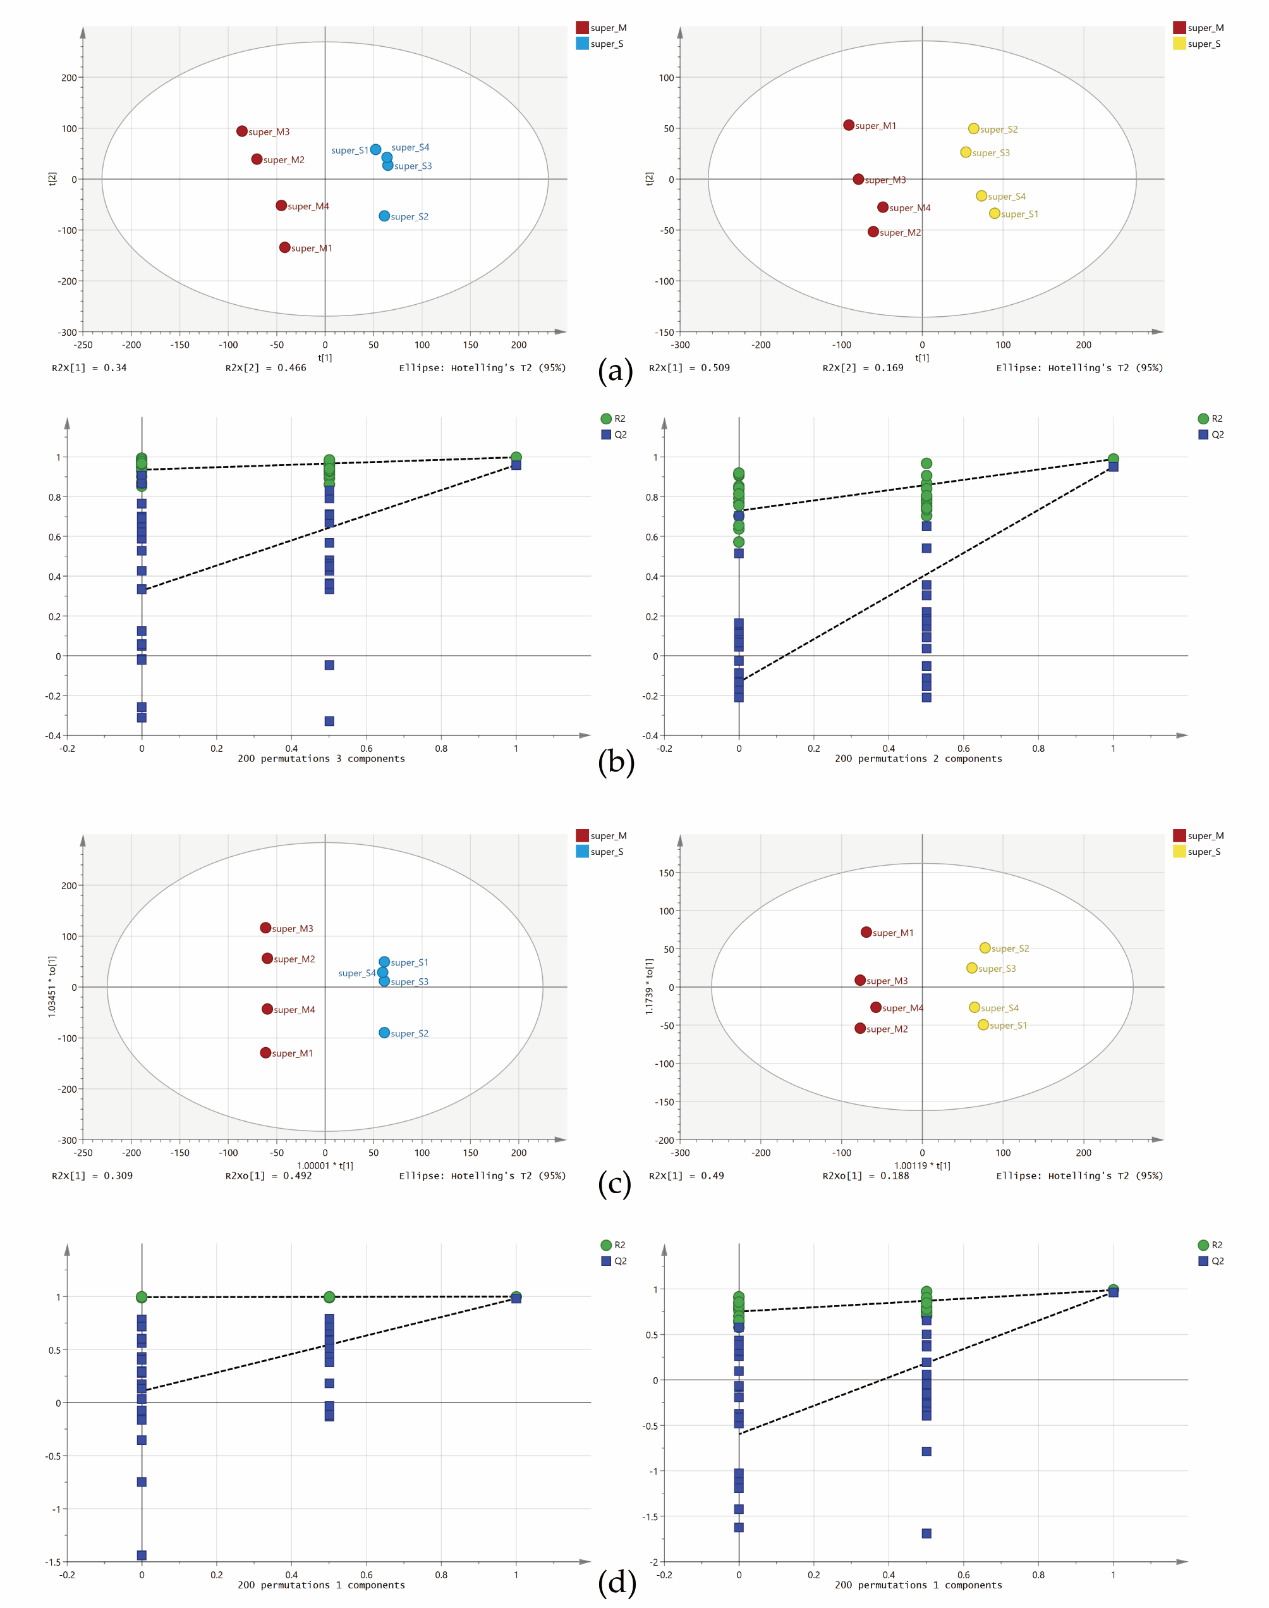


**Supplemental Figure 4** Multivariate analysis of cultured supernatant differential metabolites. (a) PLS-DA-score scatter plots, (b) PLS-DA-permutations, (c) OPLS-DA-score scatter plots, and (d) OPLS-DA-permutations in the positive and negative mod.


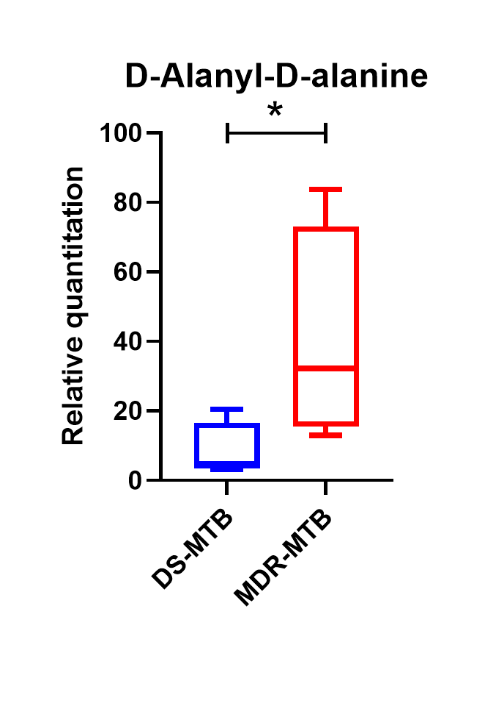


**Supplemental Figure 5** Boxplot of bacteria D-alanyl-D-alanine. N-4.


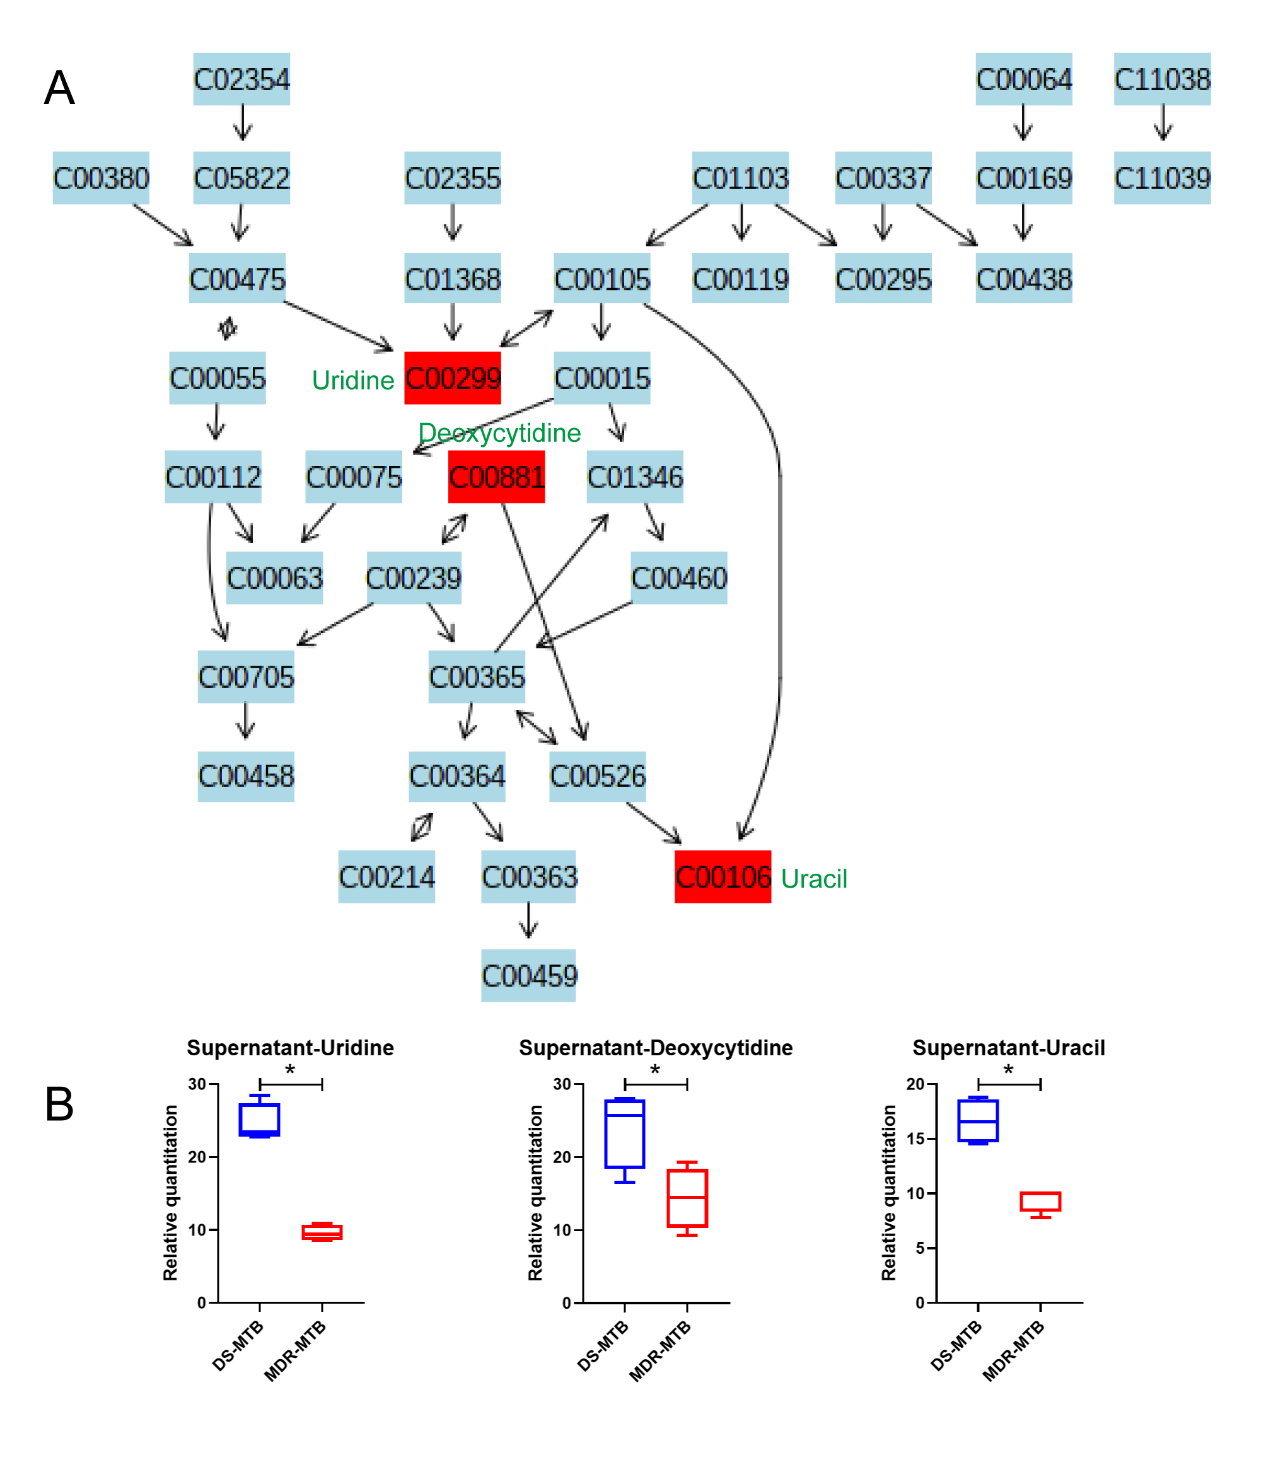


**Supplemental Figure 6** Differential metabolites of the pyrimidine metabolism pathway in cultured supernatant. (a) The pyrimidine metabolism pathway. All metabolites are represented with their KEGG ID, and the metabolites in the red box are the identified differential metabolites. The compound names of all differential metabolites are labeled alongside, with red letters representing increased and green letters representing decreased in the MDR-MTB isolate. (b) Boxplots of bacteria differential metabolites of the pyrimidine metabolism pathway. N=4.


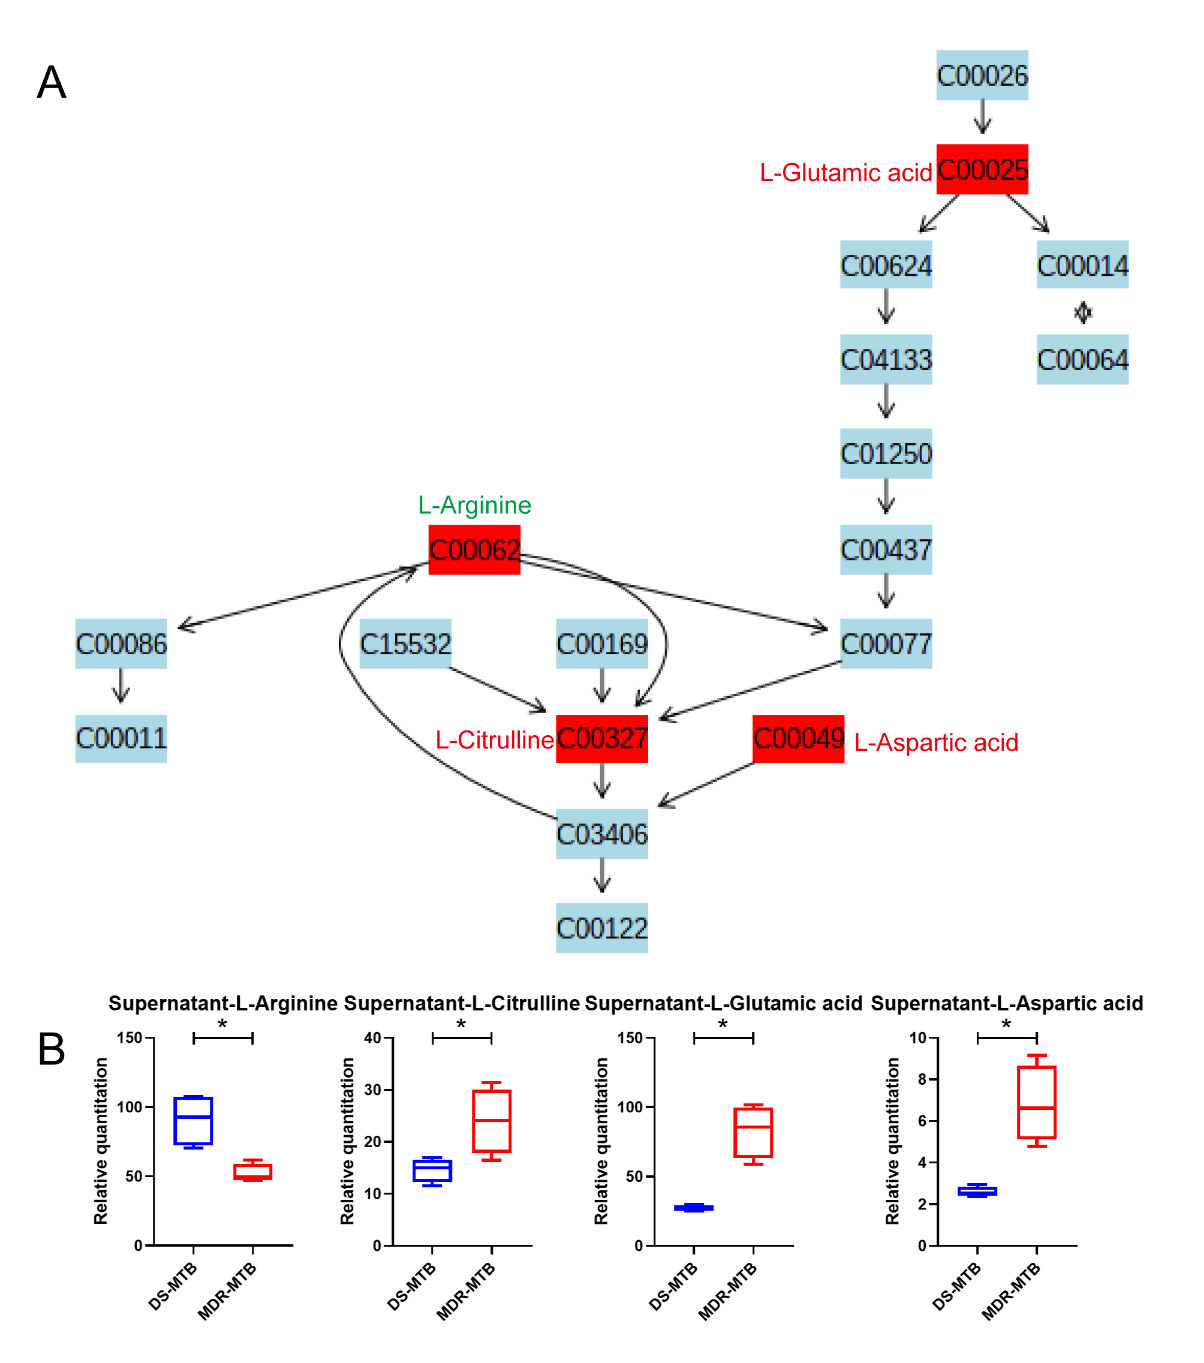


**Supplemental Figure 7** Differential metabolites of the arginine biosynthesis pathway in cultured supernatant. (a) The arginine biosynthesis pathway. All metabolites are represented with their KEGG ID, and the metabolites in the red box are the identified differential metabolites. The compound names of all differential metabolites are labeled alongside, with red letters representing increased and green letters representing decreased in the MDR-MTB isolate. (b) Boxplots of differential metabolites of the arginine biosynthesis pathway. N=4.


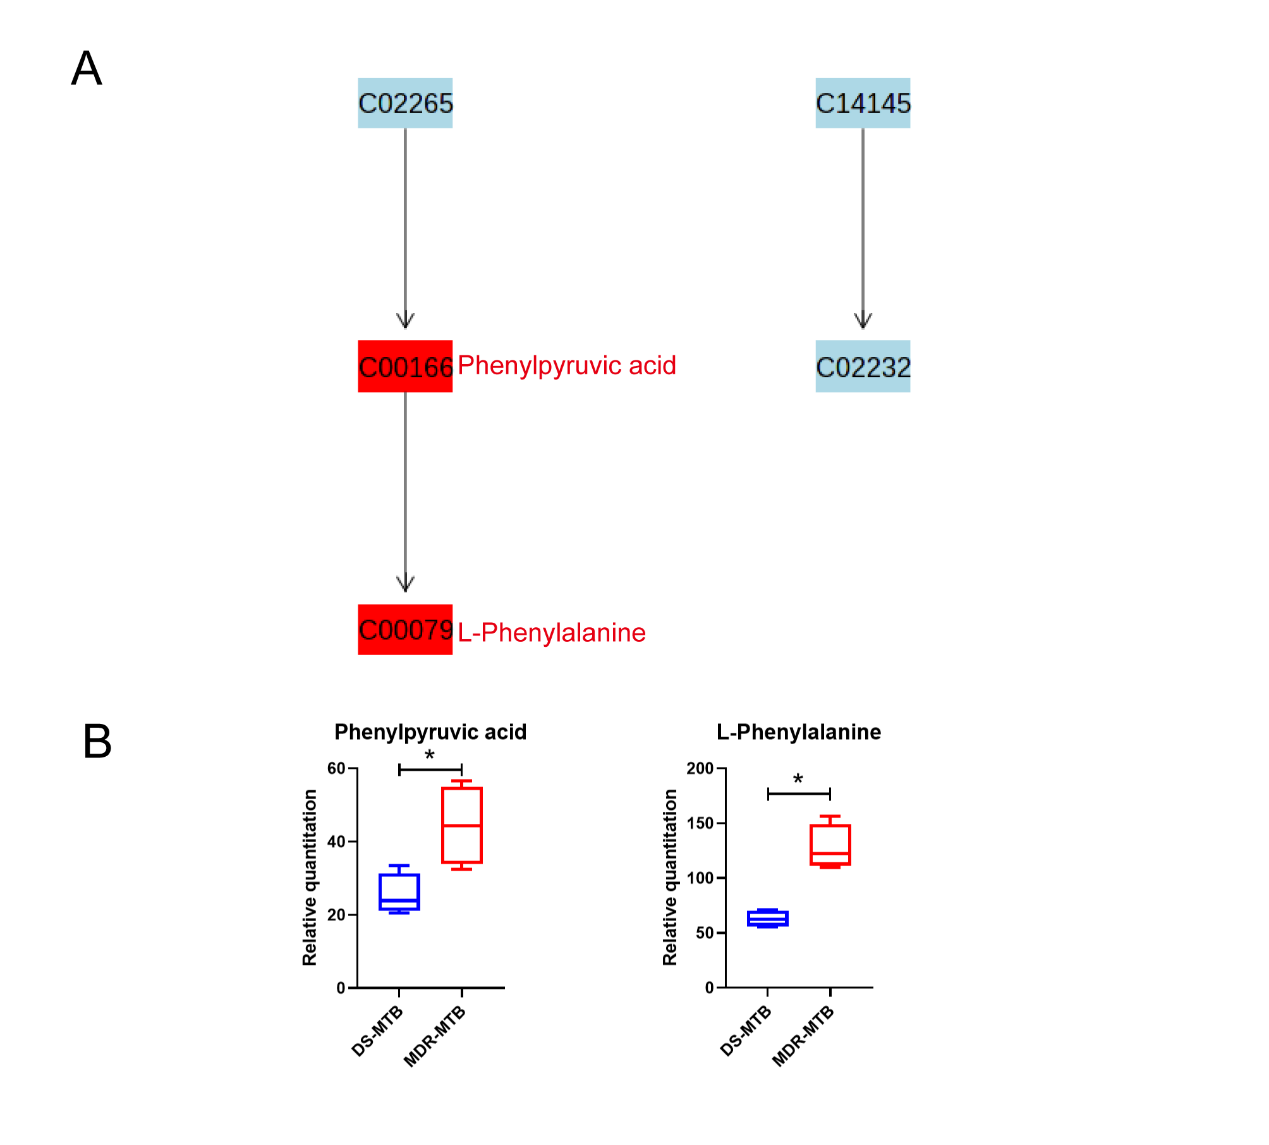


Supplemental Figure 8 Bacterial differential metabolites of the phenylalanine metabolism pathway between DS-MTB and MDR-MTB isolate. (A) The phenylalanine metabolism pathway. All metabolites are represented with their KEGG ID, and the metabolites in the red box are the identified differential metabolites. The compound names of all differential metabolites are labeled alongside, with red letters indicating an increase and green letters indicating a decrease in MDR-MTB isolate. (B) Boxplots of differential metabolites of the phenylalanine metabolism pathway. N=4.

**Supplemental Table 1** Differential metabolites of bacterial

|  | | | | | |
| --- | --- | --- | --- | --- | --- |
| **Symbol** | **FC** | **pValue** | **logFC** | **change** | **Vip** |
| gamma-Glutamylmethionine | 5.3730 | 0.0000 | 2.4257 | Up | 14.4404 |
| L-Citrulline | 4.9141 | 0.0000 | 2.2969 | Up | 11.8447 |
| Adenine | 1.7434 | 0.0001 | 0.8019 | Up | 7.4538 |
| Glu-Thr | 6.0233 | 0.0000 | 2.5906 | Up | 7.5448 |
| 5'-S-Methyl-5'-thioadenosine | 1.5332 | 0.0124 | 0.6165 | Up | 5.8817 |
| Biotin amide | 2.7075 | 0.0008 | 1.4369 | Up | 6.0362 |
| Glu-Gln | 2.3850 | 0.0000 | 1.2540 | Up | 6.4275 |
| L-Norleucine | 1.6182 | 0.0000 | 0.6944 | Up | 5.0318 |
| gamma-Glutamyl-gamma-aminobutyraye | 6.0174 | 0.0000 | 2.5891 | Up | 3.1147 |
| L-2-Aminoadipic acid | 4.5910 | 0.0000 | 2.1988 | Up | 5.7934 |
| Indoline | 1.8171 | 0.0006 | 0.8617 | Up | 2.9607 |
| 2-ethyl-1H-perimidine | 1.6040 | 0.0266 | 0.6817 | Up | 3.2034 |
| S-Adenosylmethionine | 3.4064 | 0.0004 | 1.7682 | Up | 4.5198 |
| Pro-Gln | 1.5426 | 0.0058 | 0.6254 | Up | 1.7121 |
| Nicotinamide | 1.8046 | 0.0057 | 0.8517 | Up | 1.2701 |
| Nicotinic acid mononucleotide | 1.9514 | 0.0058 | 0.9645 | Up | 2.7224 |
| L-Methionine | 5.9931 | 0.0001 | 2.5833 | Up | 2.1768 |
| N6,N6,N6-Trimethyl-L-lysine | 1.5799 | 0.0119 | 0.6598 | Up | 1.9883 |
| Guanine | 2.2797 | 0.0003 | 1.1888 | Up | 1.4765 |
| Homoarginine | 2.9989 | 0.0001 | 1.5845 | Up | 2.2855 |
| Homoserine | 1.5544 | 0.0019 | 0.6364 | Up | 1.4770 |
| 5-oxo-d-Proline | 1.5031 | 0.0125 | 0.5880 | Up | 1.1352 |
| N6-Methyladenine | 1.7417 | 0.0044 | 0.8005 | Up | 1.4102 |
| 2-Aminoadipic acid | 2.0417 | 0.0016 | 1.0297 | Up | 1.1481 |
| N-Acetyl-beta-D-glucosaminylamine | 2.7554 | 0.0003 | 1.4623 | Up | 1.6561 |
| Tryptamine | 3.6755 | 0.0000 | 1.8779 | Up | 1.3675 |
| Pyridoxal | 4.7170 | 0.0004 | 2.2379 | Up | 1.0767 |
| Cyclamic acid | 33.8010 | 0.0002 | 5.0790 | Up | 1.1832 |
| N-Acetyl-D-Mannosamine | 2.5234 | 0.0000 | 1.3354 | Up | 1.0024 |
| Imidazoleacetic acid | 6.8249 | 0.0000 | 2.7708 | Up | 1.2564 |
| Succinyl proline | 9.2764 | 0.0002 | 3.2136 | Up | 1.1322 |
| Xylitol | 1.5263 | 0.0007 | 0.6101 | Up | 12.6733 |
| Adenine | 1.9329 | 0.0001 | 0.9507 | Up | 7.7078 |
| gamma-Glutamylleucine | 2.1191 | 0.0175 | 1.0835 | Up | 7.0393 |
| D-Glucose 6-phosphate | 1.6368 | 0.0445 | 0.7108 | Up | 4.0244 |
| gamma-Glutamylmethionine | 8.3655 | 0.0002 | 3.0645 | Up | 9.5154 |
| Phenylacetic acid | 4.3762 | 0.0001 | 2.1297 | Up | 8.8222 |
| Glycerol | 1.7501 | 0.0024 | 0.8074 | Up | 9.5192 |
| 4-methyl-2-oxopentanoic acid | 2.5342 | 0.0007 | 1.3415 | Up | 10.2829 |
| Asp-Leu | 1.6864 | 0.0138 | 0.7540 | Up | 5.8465 |
| Glu-Thr | 10.7024 | 0.0003 | 3.4199 | Up | 5.0770 |
| L-Phenylalanine | 2.0257 | 0.0005 | 1.0184 | Up | 3.6579 |
| Glu-Gln | 3.3628 | 0.0002 | 1.7497 | Up | 5.2123 |
| L-Citrulline | 10.4652 | 0.0000 | 3.3875 | Up | 5.9431 |
| L-Tyrosine | 1.8331 | 0.0095 | 0.8743 | Up | 3.5091 |
| 3,5-Dioxooctanedioic acid | 6.9467 | 0.0004 | 2.7963 | Up | 2.4404 |
| 5'-S-Methyl-5'-thioadenosine | 2.2744 | 0.0020 | 1.1855 | Up | 2.7461 |
| 2-Aminoadipic acid | 4.8145 | 0.0001 | 2.2674 | Up | 4.4409 |
| Ornithine | 2.5811 | 0.0006 | 1.3680 | Up | 2.4758 |
| Phenylpyruvic acid | 1.7457 | 0.0163 | 0.8038 | Up | 1.8202 |
| dIMP | 2.1360 | 0.0017 | 1.0949 | Up | 2.1643 |
| Threonine | 1.6254 | 0.0436 | 0.7008 | Up | 2.8635 |
| 4-Phenylbutyric acid | 5.2315 | 0.0027 | 2.3872 | Up | 2.1006 |
| gamma-Glutamyl-gamma-aminobutyraye | 9.1575 | 0.0010 | 3.1950 | Up | 1.8485 |
| D-Alanyl-D-alanine | 4.8465 | 0.0290 | 2.2769 | Up | 2.1227 |
| D-Tryptophan | 2.2893 | 0.0037 | 1.1949 | Up | 2.4027 |
| Cyclic ADP-ribose | 1.5095 | 0.0299 | 0.5941 | Up | 1.7508 |
| Orotic acid | 8.0758 | 0.0000 | 3.0136 | Up | 3.5658 |
| Nicotinamide adenine dinucleotide | 1.5035 | 0.0385 | 0.5883 | Up | 1.5684 |
| 2'-Deoxyinosine | 4.4221 | 0.0203 | 2.1447 | Up | 1.6902 |
| O-propenoyl-D-carnitine | 3.2257 | 0.0010 | 1.6896 | Up | 1.4055 |
| 3-Methylxanthine | 1.9625 | 0.0075 | 0.9727 | Up | 1.4948 |
| Thymidine 5'-monophosphate | 1.9231 | 0.0167 | 0.9434 | Up | 1.0171 |
| Tyr-Thr | 6.2689 | 0.0115 | 2.6482 | Up | 1.3203 |
| Glu-Gly | 5.4767 | 0.0000 | 2.4533 | Up | 1.9019 |
| Nicotinic acid mono nucleotide | 2.0507 | 0.0161 | 1.0361 | Up | 1.1993 |
| Cysteic acid | 17.9639 | 0.0000 | 4.1670 | Up | 1.8628 |
| D-Erythrose 4-phosphate | 2.0323 | 0.0036 | 1.0231 | Up | 1.5480 |
| Guanine | 17.1078 | 0.0001 | 4.0966 | Up | 1.8530 |
| D-Methionine | 11.2328 | 0.0011 | 3.4896 | Up | 1.0261 |
| dADP | 3.0474 | 0.0004 | 1.6076 | Up | 1.3107 |
| D-Serine | 1.9815 | 0.0011 | 0.9866 | Up | 1.2196 |
| Thymidine 5'-diphosphate | 3.0792 | 0.0002 | 1.6226 | Up | 1.2588 |
| Valylvaline | 3.7435 | 0.0014 | 1.9044 | Up | 1.0568 |
| 7-Methyladenine | 2.6407 | 0.0000 | 1.4009 | Up | 1.1719 |
| L-Glutamine | 0.4439 | 0.0000 | (1.1715) | Down | 10.3379 |
| Adenosine | 0.2504 | 0.0026 | (1.9975) | Down | 4.4254 |
| Adenosine 5'-monophosphate | 0.5265 | 0.0040 | (0.9254) | Down | 4.6654 |
| D-Pyroglutamic Acid | 0.6077 | 0.0004 | (0.7185) | Down | 4.1555 |
| Nicotinic acid | 0.3896 | 0.0006 | (1.3599) | Down | 3.4706 |
| 1-Methyladenosine | 0.4228 | 0.0002 | (1.2418) | Down | 1.9534 |
| Glycerol 2-phosphate | 0.2059 | 0.0003 | (2.2797) | Down | 3.5573 |
| 11-Aminoundecanoic acid | 0.3963 | 0.0159 | (1.3353) | Down | 2.8557 |
| Orthophosphate | 0.4865 | 0.0022 | (1.0396) | Down | 2.4428 |
| Cytosine | 0.5381 | 0.0017 | (0.8941) | Down | 1.6566 |
| Pantothenic acid | 0.3694 | 0.0016 | (1.4367) | Down | 3.2653 |
| L-Tyrosine methyl ester | 0.5828 | 0.0015 | (0.7789) | Down | 2.7378 |
| 2(alpha-D-Mannosyl)-D-glycerate | 0.4148 | 0.0087 | (1.2696) | Down | 1.7125 |
| N6-Acetyl-L-lysine | 0.3554 | 0.0000 | (1.4927) | Down | 3.0098 |
| Methionine | 0.5788 | 0.0087 | (0.7888) | Down | 2.0110 |
| Dihydrothymine | 0.4867 | 0.0012 | (1.0389) | Down | 1.4308 |
| D-Panthenol | 0.2934 | 0.0014 | (1.7692) | Down | 2.0847 |
| L-Histidinol | 0.5079 | 0.0222 | (0.9773) | Down | 1.5669 |
| 6-(alpha-D-Glucosaminyl)-1D-myo-inositol | 0.2216 | 0.0004 | (2.1742) | Down | 1.3273 |
| 5-Methylcytosine | 0.4905 | 0.0003 | (1.0276) | Down | 1.3747 |
| 2'-O-Methyl-5-methylcytidine | 0.4752 | 0.0008 | (1.0735) | Down | 2.1930 |
| Pantothenate | 0.4747 | 0.0101 | (1.0749) | Down | 1.2709 |
| L-Homocitrulline | 0.5206 | 0.0000 | (0.9417) | Down | 1.0524 |
| S-Acetyldihydrolipoamide | 0.5420 | 0.0085 | (0.8837) | Down | 1.6815 |
| beta-Glycerophosphoricacid | 0.4195 | 0.0015 | (1.2533) | Down | 1.1573 |
| D-4'-Phosphopantothenate | 0.3982 | 0.0001 | (1.3286) | Down | 1.1221 |
| Dihydrouridine | 0.2748 | 0.0010 | (1.8635) | Down | 1.2604 |
| 2-Amino-3-methoxybenzoic acid | 0.2236 | 0.0012 | (2.1612) | Down | 1.4159 |
| 2'-O-Methylcytidine | 0.6483 | 0.0007 | (0.6253) | Down | 1.2607 |
| 3-Methylhistidine | 0.1586 | 0.0000 | (2.6570) | Down | 1.2142 |
| Cytidine 5'-monophosphate | 0.4464 | 0.0131 | (1.1637) | Down | 1.3006 |
| 2'-Deoxycytidine | 0.3272 | 0.0000 | (1.6118) | Down | 1.5336 |
| 5,6-Dimethylbenzimidazole | 0.3061 | 0.0103 | (1.7081) | Down | 1.3696 |
| N-Acetylglutamine | 0.5873 | 0.0000 | (0.7677) | Down | 1.0966 |
| D-Glutamine | 0.4702 | 0.0004 | (1.0887) | Down | 8.8202 |
| Glycerol 3-phosphate | 0.2437 | 0.0003 | (2.0370) | Down | 7.4171 |
| Adenosine | 0.2373 | 0.0088 | (2.0750) | Down | 2.6733 |
| Nicotinic acid | 0.6210 | 0.0410 | (0.6873) | Down | 2.5994 |
| dGMP | 0.5904 | 0.0394 | (0.7604) | Down | 3.2387 |
| Glutamine | 0.5572 | 0.0333 | (0.8437) | Down | 3.1662 |
| D-Mannitol | 0.5759 | 0.0151 | (0.7961) | Down | 2.9584 |
| 2-Hydroxy-2_4-pentadienoate | 0.3132 | 0.0022 | (1.6750) | Down | 1.0104 |
| 10-Propoxydecanoic acid | 0.2802 | 0.0055 | (1.8353) | Down | 2.9477 |
| D-Sedoheptulose 7-phosphate | 0.5107 | 0.0102 | (0.9694) | Down | 2.6577 |
| L-2-Hydroxyvaleric acid | 0.4930 | 0.0003 | (1.0204) | Down | 1.7718 |
| Gluconic acid | 0.5425 | 0.0061 | (0.8822) | Down | 1.5507 |
| Uridine | 0.2159 | 0.0000 | (2.2115) | Down | 2.1479 |
| 3-Hydroxypropenoate | 0.6102 | 0.0304 | (0.7126) | Down | 1.5642 |
| Dihydrothymine | 0.3802 | 0.0282 | (1.3952) | Down | 1.8605 |
| 12-Hydroxydodecanoic acid | 0.3784 | 0.0147 | (1.4020) | Down | 1.3645 |
| UMP | 0.5616 | 0.0315 | (0.8324) | Down | 1.5395 |
| Methyl-beta-galactopyranoside | 0.3833 | 0.0139 | (1.3834) | Down | 1.4480 |
| N-Acetyl-D-glucosaminate | 0.2339 | 0.0269 | (2.0961) | Down | 1.0017 |
| 5,6-Dimethylbenzimidazole | 0.3427 | 0.0002 | (1.5448) | Down | 1.0635 |

**Supplemental Table 2** Differential metabolites of cultured supernatant

|  | | | | | |
| --- | --- | --- | --- | --- | --- |
| **Symbol** | **FC** | **pValue** | **logFC** | **change** | **Vip** |
| L-Glutamic acid | 3.0409 | 0.0016 | 1.6045 | Up | 4.2723 |
| Glycerophosphocholine | 2.2408 | 0.0049 | 1.1640 | Up | 8.6238 |
| L-Citrulline | 1.6401 | 0.0310 | 0.7138 | Up | 1.5878 |
| Adenine | 1.9647 | 0.0193 | 0.9743 | Up | 12.1790 |
| Asp-Leu | 1.6500 | 0.0253 | 0.7224 | Up | 1.2955 |
| 5'-S-Methyl-5'-thioadenosine | 12.4697 | 0.0010 | 3.6404 | Up | 5.9158 |
| L-Norleucine | 1.9259 | 0.0099 | 0.9455 | Up | 9.0699 |
| D-Pyroglutamic Acid | 1.8378 | 0.0076 | 0.8780 | Up | 1.4407 |
| L-Phenylalanine | 1.6248 | 0.0229 | 0.7002 | Up | 7.3202 |
| L-Homoserine | 1.6621 | 0.0228 | 0.7330 | Up | 3.8738 |
| D-Glucose 6-phosphate | 4.4263 | 0.0021 | 2.1461 | Up | 1.2116 |
| Pro-Gln | 3.2014 | 0.0008 | 1.6787 | Up | 4.5035 |
| 1-Methyladenosine | 2.5834 | 0.0098 | 1.3693 | Up | 1.2639 |
| L-Methionine | 5.6303 | 0.0000 | 2.4932 | Up | 1.2379 |
| L-Alanyl-L-proline | 1.8178 | 0.0197 | 0.8622 | Up | 3.4323 |
| Dihydrothymine | 1.6280 | 0.0368 | 0.7031 | Up | 1.3429 |
| L-Aspartic acid | 2.6120 | 0.0038 | 1.3852 | Up | 1.1474 |
| Glutamic acid | 7.3416 | 0.0001 | 2.8761 | Up | 3.5367 |
| N-Acetylneuraminicacid | 1.6868 | 0.0240 | 0.7542 | Up | 1.0579 |
| L-Methionine sulfoxide | 4.4233 | 0.0007 | 2.1451 | Up | 1.2370 |
| 2-Oxindole | 2.2904 | 0.0062 | 1.1956 | Up | 1.0943 |
| Threonylglutamine | 2.8866 | 0.0005 | 1.5294 | Up | 1.6180 |
| Cyclic AMP | 4.0862 | 0.0004 | 2.0307 | Up | 1.0356 |
| Xylitol | 2.2659 | 0.0054 | 1.1801 | Up | 21.2891 |
| Adenine | 3.2303 | 0.0001 | 1.6917 | Up | 8.6991 |
| L-Glutamic acid | 2.2595 | 0.0000 | 1.1760 | Up | 2.9896 |
| D-Glucose 6-phosphate | 6.5080 | 0.0001 | 2.7022 | Up | 1.9649 |
| Phenylacetic acid | 1.9406 | 0.0043 | 0.9565 | Up | 2.8702 |
| Glycerol | 2.7681 | 0.0072 | 1.4689 | Up | 15.0779 |
| Asp-Leu | 1.9626 | 0.0024 | 0.9728 | Up | 2.0000 |
| Glu-Thr | 2.6671 | 0.0013 | 1.4153 | Up | 2.0482 |
| L-Phenylalanine | 1.9770 | 0.0005 | 0.9833 | Up | 3.9275 |
| Mevalonic acid | 1.7939 | 0.0171 | 0.8431 | Up | 4.6677 |
| D-Malic acid | 4.7202 | 0.0001 | 2.2389 | Up | 2.8589 |
| L-Tyrosine | 48.4895 | 0.0085 | 5.5996 | Up | 2.4316 |
| L-Lactic Acid | 1.9697 | 0.0006 | 0.9780 | Up | 5.3534 |
| Threonine | 10.2871 | 0.0066 | 3.3628 | Up | 3.5604 |
| D-Tryptophan | 39.3103 | 0.0068 | 5.2968 | Up | 1.2797 |
| 3-Methylxanthine | 2.1001 | 0.0088 | 1.0705 | Up | 2.4386 |
| D-Glucose | 2.3630 | 0.0026 | 1.2406 | Up | 2.4913 |
| 2-Methylserine | 4.2739 | 0.0045 | 2.0955 | Up | 2.0422 |
| 5-Methyluridine | 1.6326 | 0.0098 | 0.7071 | Up | 2.9111 |
| Valylproline | 1.7726 | 0.0107 | 0.8258 | Up | 1.5831 |
| Nordihydroguaiaretic acid | 11.5730 | 0.0001 | 3.5327 | Up | 2.5412 |
| Glu-Gly | 1.9429 | 0.0048 | 0.9582 | Up | 1.6674 |
| D-Methionine | 9.2405 | 0.0000 | 3.2080 | Up | 1.0308 |
| mercaptopurine | 2.5702 | 0.0170 | 1.3619 | Up | 1.9985 |
| 7-Methyladenine | 3.6486 | 0.0474 | 1.8674 | Up | 1.0616 |
| L-Lysine | 0.6184 | 0.0332 | (0.6933) | Down | 12.1187 |
| L-Arginine | 0.6047 | 0.0357 | (0.7258) | Down | 5.9193 |
| D-Panthenol | 0.5420 | 0.0235 | (0.8836) | Down | 2.6256 |
| L-Histidinol | 0.3687 | 0.0097 | (1.4394) | Down | 1.5257 |
| 2-Chloro-3-oxohexanedioic acid | 0.6188 | 0.0394 | (0.6924) | Down | 1.8327 |
| 2'-Deoxycytidine | 0.5999 | 0.0386 | (0.7371) | Down | 1.6090 |
| Hexylamine | 0.4366 | 0.0065 | (1.1958) | Down | 1.0073 |
| Spermine | 0.4100 | 0.0085 | (1.2862) | Down | 2.2447 |
| 2,4,6-Octatriynoic acid | 0.4267 | 0.0075 | (1.2286) | Down | 1.3070 |
| 7-Methyladenine | 0.6048 | 0.0338 | (0.7254) | Down | 1.3717 |
| Linoleamide | 0.6232 | 0.0384 | (0.6823) | Down | 1.1163 |
| L-Arginine | 0.5715 | 0.0079 | (0.8071) | Down | 2.7237 |
| Nonanoic acid | 0.6218 | 0.0055 | (0.6854) | Down | 1.5190 |
| Uridine | 0.3905 | 0.0000 | (1.3567) | Down | 1.8486 |
| Valeric acid | 0.6467 | 0.0080 | (0.6288) | Down | 2.7269 |
| 3-methyl-2-oxovaleric acid | 0.4939 | 0.0321 | (1.0177) | Down | 3.0105 |
| Uracil | 0.5726 | 0.0009 | (0.8043) | Down | 1.2041 |
| O-Phosphorylethanolamine | 0.6477 | 0.0204 | (0.6266) | Down | 1.1109 |

**Supplemental Table 3** Pathway results of the bacterial differential metabolites

|  | | | | | | | | |
| --- | --- | --- | --- | --- | --- | --- | --- | --- |
|  | **Total** | **Expected** | **Hits** | **Raw p** | **-Log10(p)** | **Holm adjust** | **FDR** | **Impact** |
| Pyrimidine metabolism | 35 | 1.7902 | 9 | 0.0000 | 4.5343 | 0.0024 | 0.0024 | 0.3635 |
| Purine metabolism | 67 | 3.4269 | 9 | 0.0050 | 2.3006 | 0.4054 | 0.1487 | 0.0820 |
| Nicotinate and nicotinamide metabolism | 15 | 0.7672 | 4 | 0.0054 | 2.2643 | 0.4353 | 0.1487 | 0.4056 |
| Phenylalanine, tyrosine and tryptophan biosynthesis | 22 | 1.1253 | 4 | 0.0224 | 1.6507 | 1.0000 | 0.3808 | 0.0577 |
| Phenylalanine metabolism | 5 | 0.2557 | 2 | 0.0232 | 1.6341 | 1.0000 | 0.3808 | 1.0000 |
| D-Glutamine and D-glutamate metabolism | 7 | 0.3580 | 2 | 0.0457 | 1.3405 | 1.0000 | 0.6240 | 0.0000 |
| Arginine biosynthesis | 18 | 0.9207 | 3 | 0.0597 | 1.2241 | 1.0000 | 0.6992 | 0.2262 |
| Pentose phosphate pathway | 26 | 1.3299 | 3 | 0.1432 | 0.8440 | 1.0000 | 1.0000 | 0.0583 |
| Novobiocin biosynthesis | 3 | 0.1534 | 1 | 0.1459 | 0.8360 | 1.0000 | 1.0000 | 0.0000 |
| Cysteine and methionine metabolism | 43 | 2.1994 | 4 | 0.1723 | 0.7636 | 1.0000 | 1.0000 | 0.1821 |
| Aminoacyl-tRNA biosynthesis | 45 | 2.3017 | 4 | 0.1934 | 0.7136 | 1.0000 | 1.0000 | 0.0000 |
| D-Alanine metabolism | 5 | 0.2557 | 1 | 0.2313 | 0.6358 | 1.0000 | 1.0000 | 0.0000 |
| Histidine metabolism | 18 | 0.9207 | 2 | 0.2338 | 0.6313 | 1.0000 | 1.0000 | 0.1039 |
| beta-Alanine metabolism | 6 | 0.3069 | 1 | 0.2708 | 0.5673 | 1.0000 | 1.0000 | 0.0000 |
| Glycerolipid metabolism | 21 | 1.0741 | 2 | 0.2922 | 0.5343 | 1.0000 | 1.0000 | 0.0603 |
| Pantothenate and CoA biosynthesis | 21 | 1.0741 | 2 | 0.2922 | 0.5343 | 1.0000 | 1.0000 | 0.2506 |
| Nitrogen metabolism | 7 | 0.3580 | 1 | 0.3084 | 0.5109 | 1.0000 | 1.0000 | 0.0000 |
| Valine, leucine and isoleucine biosynthesis | 22 | 1.1253 | 2 | 0.3117 | 0.5063 | 1.0000 | 1.0000 | 0.0000 |
| Arginine and proline metabolism | 24 | 1.2276 | 2 | 0.3502 | 0.4556 | 1.0000 | 1.0000 | 0.1372 |
| Tyrosine metabolism | 9 | 0.4603 | 1 | 0.3778 | 0.4227 | 1.0000 | 1.0000 | 0.0000 |
| Streptomycin biosynthesis | 10 | 0.5115 | 1 | 0.4100 | 0.3873 | 1.0000 | 1.0000 | 0.1389 |
| Vitamin B6 metabolism | 11 | 0.5626 | 1 | 0.4405 | 0.3561 | 1.0000 | 1.0000 | 0.0000 |
| Glycine, serine and threonine metabolism | 32 | 1.6367 | 2 | 0.4954 | 0.3050 | 1.0000 | 1.0000 | 0.1330 |
| Biosynthesis of secondary metabolites - other antibiotics | 14 | 0.7161 | 1 | 0.5230 | 0.2815 | 1.0000 | 1.0000 | 0.0000 |
| Peptidoglycan biosynthesis | 18 | 0.9207 | 1 | 0.6147 | 0.2113 | 1.0000 | 1.0000 | 0.0844 |
| Fructose and mannose metabolism | 20 | 1.0230 | 1 | 0.6539 | 0.1845 | 1.0000 | 1.0000 | 0.0000 |
| Glycerophospholipid metabolism | 21 | 1.0741 | 1 | 0.6719 | 0.1727 | 1.0000 | 1.0000 | 0.3206 |
| Alanine, aspartate and glutamate metabolism | 23 | 1.1764 | 1 | 0.7054 | 0.1516 | 1.0000 | 1.0000 | 0.2400 |
| Galactose metabolism | 27 | 1.3810 | 1 | 0.7625 | 0.1177 | 1.0000 | 1.0000 | 0.0000 |
| Starch and sucrose metabolism | 27 | 1.3810 | 1 | 0.7625 | 0.1177 | 1.0000 | 1.0000 | 0.1628 |
| Valine, leucine and isoleucine degradation | 30 | 1.5344 | 1 | 0.7981 | 0.0979 | 1.0000 | 1.0000 | 0.0416 |
| Pentose and glucuronate interconversions | 31 | 1.5856 | 1 | 0.8088 | 0.0922 | 1.0000 | 1.0000 | 0.0000 |
| Glyoxylate and dicarboxylate metabolism | 34 | 1.7390 | 1 | 0.8376 | 0.0770 | 1.0000 | 1.0000 | 0.0000 |
| Amino sugar and nucleotide sugar metabolism | 34 | 1.7390 | 1 | 0.8376 | 0.0770 | 1.0000 | 1.0000 | 0.0277 |

**Supplemental Table 4** Pathway results of the cultured supernatant differential metabolites

|  | | | | | | | | |
| --- | --- | --- | --- | --- | --- | --- | --- | --- |
|  | **Total** | **Expected** | **Hits** | **Raw p** | **-Log10(p)** | **Holm adjust** | **FDR** | **Impact** |
| Aminoacyl-tRNA biosynthesis | 45 | 1.1743 | 8 | 0.0000 | 5.1262 | 0.0006 | 0.0006 | 0.1667 |
| Arginine biosynthesis | 18 | 0.4697 | 4 | 0.0009 | 3.0628 | 0.0701 | 0.0355 | 0.2563 |
| Cysteine and methionine metabolism | 43 | 1.1221 | 5 | 0.0039 | 2.4074 | 0.3131 | 0.1070 | 0.1741 |
| Lysine biosynthesis | 15 | 0.3914 | 3 | 0.0058 | 2.2355 | 0.4593 | 0.1192 | 0.0000 |
| Glycine, serine and threonine metabolism | 32 | 0.8351 | 3 | 0.0473 | 1.3256 | 1.0000 | 0.7062 | 0.2093 |
| Pyrimidine metabolism | 35 | 0.9134 | 3 | 0.0592 | 1.2276 | 1.0000 | 0.7062 | 0.1308 |
| Carbapenem biosynthesis | 3 | 0.0783 | 1 | 0.0763 | 1.1172 | 1.0000 | 0.7062 | 0.0000 |
| Novobiocin biosynthesis | 3 | 0.0783 | 1 | 0.0763 | 1.1172 | 1.0000 | 0.7062 | 0.0000 |
| Histidine metabolism | 18 | 0.4697 | 2 | 0.0775 | 1.1107 | 1.0000 | 0.7062 | 0.1039 |
| Phenylalanine, tyrosine and tryptophan biosynthesis | 22 | 0.5741 | 2 | 0.1099 | 0.9592 | 1.0000 | 0.7450 | 0.0199 |
| Valine, leucine and isoleucine biosynthesis | 22 | 0.5741 | 2 | 0.1099 | 0.9592 | 1.0000 | 0.7450 | 0.0215 |
| Alanine, aspartate and glutamate metabolism | 23 | 0.6002 | 2 | 0.1185 | 0.9265 | 1.0000 | 0.7450 | 0.5533 |
| Phenylalanine metabolism | 5 | 0.1305 | 1 | 0.1241 | 0.9063 | 1.0000 | 0.7450 | 0.0000 |
| Arginine and proline metabolism | 24 | 0.6263 | 2 | 0.1272 | 0.8955 | 1.0000 | 0.7450 | 0.2561 |
| beta-Alanine metabolism | 6 | 0.1566 | 1 | 0.1471 | 0.8325 | 1.0000 | 0.7843 | 0.0000 |
| Nitrogen metabolism | 7 | 0.1827 | 1 | 0.1695 | 0.7709 | 1.0000 | 0.7843 | 0.0000 |
| D-Glutamine and D-glutamate metabolism | 7 | 0.1827 | 1 | 0.1695 | 0.7709 | 1.0000 | 0.7843 | 0.1724 |
| Glycolysis / Gluconeogenesis | 30 | 0.7829 | 2 | 0.1826 | 0.7386 | 1.0000 | 0.7843 | 0.0011 |
| Monobactam biosynthesis | 8 | 0.2088 | 1 | 0.1913 | 0.7183 | 1.0000 | 0.7843 | 0.0000 |
| Cyanoamino acid metabolism | 8 | 0.2088 | 1 | 0.1913 | 0.7183 | 1.0000 | 0.7843 | 0.0000 |
| Tyrosine metabolism | 9 | 0.2349 | 1 | 0.2126 | 0.6725 | 1.0000 | 0.8301 | 0.0000 |
| Streptomycin biosynthesis | 10 | 0.2610 | 1 | 0.2333 | 0.6320 | 1.0000 | 0.8697 | 0.1389 |
| Taurine and hypotaurine metabolism | 11 | 0.2871 | 1 | 0.2535 | 0.5960 | 1.0000 | 0.9039 | 0.0000 |
| Lysine degradation | 13 | 0.3393 | 1 | 0.2925 | 0.5339 | 1.0000 | 0.9992 | 0.0000 |
| Biosynthesis of secondary metabolites - other antibiotics | 14 | 0.3653 | 1 | 0.3112 | 0.5070 | 1.0000 | 1.0000 | 0.0000 |
| Nicotinate and nicotinamide metabolism | 15 | 0.3914 | 1 | 0.3294 | 0.4823 | 1.0000 | 1.0000 | 0.0000 |
| Sulfur metabolism | 15 | 0.3914 | 1 | 0.3294 | 0.4823 | 1.0000 | 1.0000 | 0.0000 |
| Glutathione metabolism | 18 | 0.4697 | 1 | 0.3814 | 0.4186 | 1.0000 | 1.0000 | 0.1716 |
| Glycerolipid metabolism | 21 | 0.5480 | 1 | 0.4295 | 0.3670 | 1.0000 | 1.0000 | 0.0000 |
| Butanoate metabolism | 21 | 0.5480 | 1 | 0.4295 | 0.3670 | 1.0000 | 1.0000 | 0.0000 |
| Pantothenate and CoA biosynthesis | 21 | 0.5480 | 1 | 0.4295 | 0.3670 | 1.0000 | 1.0000 | 0.0000 |
| Glycerophospholipid metabolism | 21 | 0.5480 | 1 | 0.4295 | 0.3670 | 1.0000 | 1.0000 | 0.2061 |
| Pyruvate metabolism | 24 | 0.6263 | 1 | 0.4740 | 0.3242 | 1.0000 | 1.0000 | 0.0000 |
| Pentose phosphate pathway | 26 | 0.6785 | 1 | 0.5018 | 0.2995 | 1.0000 | 1.0000 | 0.0000 |
| Galactose metabolism | 27 | 0.7046 | 1 | 0.5152 | 0.2881 | 1.0000 | 1.0000 | 0.0000 |
| Starch and sucrose metabolism | 27 | 0.7046 | 1 | 0.5152 | 0.2881 | 1.0000 | 1.0000 | 0.1628 |
| Valine, leucine and isoleucine degradation | 30 | 0.7829 | 1 | 0.5532 | 0.2571 | 1.0000 | 1.0000 | 0.0416 |
| Pentose and glucuronate interconversions | 31 | 0.8090 | 1 | 0.5653 | 0.2478 | 1.0000 | 1.0000 | 0.0000 |
| Glyoxylate and dicarboxylate metabolism | 34 | 0.8873 | 1 | 0.5995 | 0.2222 | 1.0000 | 1.0000 | 0.0000 |
| Purine metabolism | 67 | 1.7484 | 1 | 0.8406 | 0.0754 | 1.0000 | 1.0000 | 0.0246 |
