# Supplementary material
Source: publisher site journal article supplement (https://www.dovepress.com/article/405987)
Supplement: Supplementary file 2 [file get_supplementary_file.php]

RT: 0.00 - 17.90

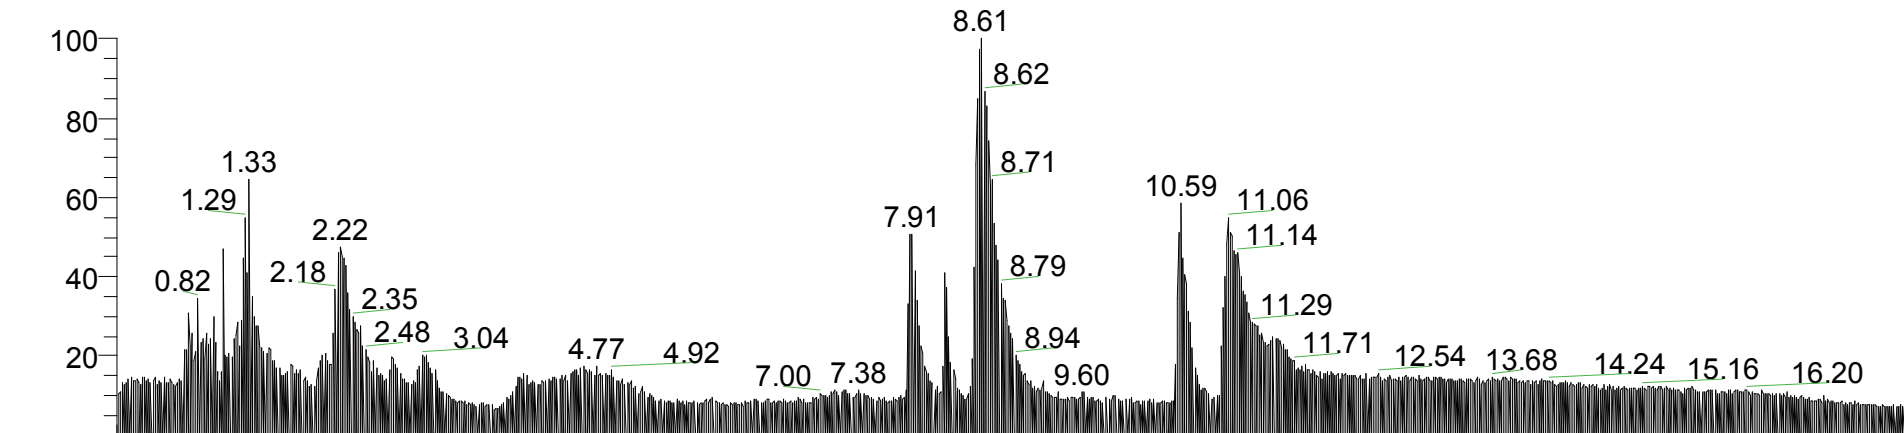

NL:  
3.92E9  
TIC MS  
Hilic\_N\_20220  
118\_2per\_1\_50  
\_1

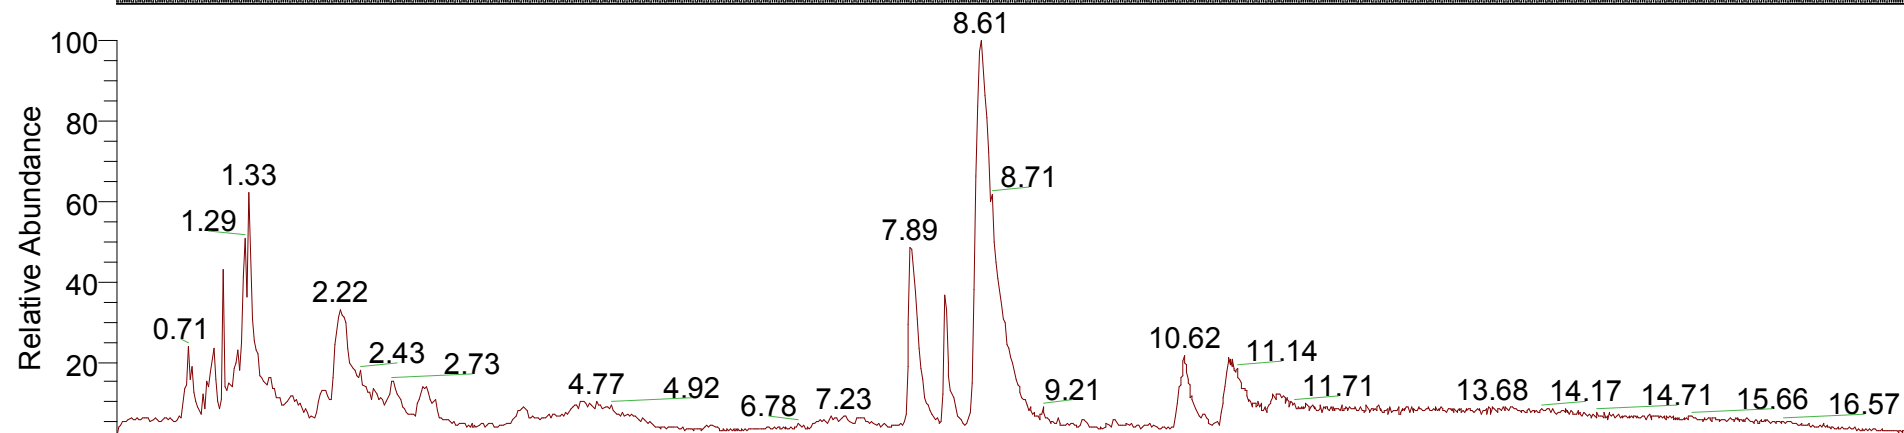

NL:  
3.69E9  
m/z=  
120.00-2000.00  
F: Full ms MS  
Hilic\_N\_20220  
118\_2per\_1\_50  
\_1

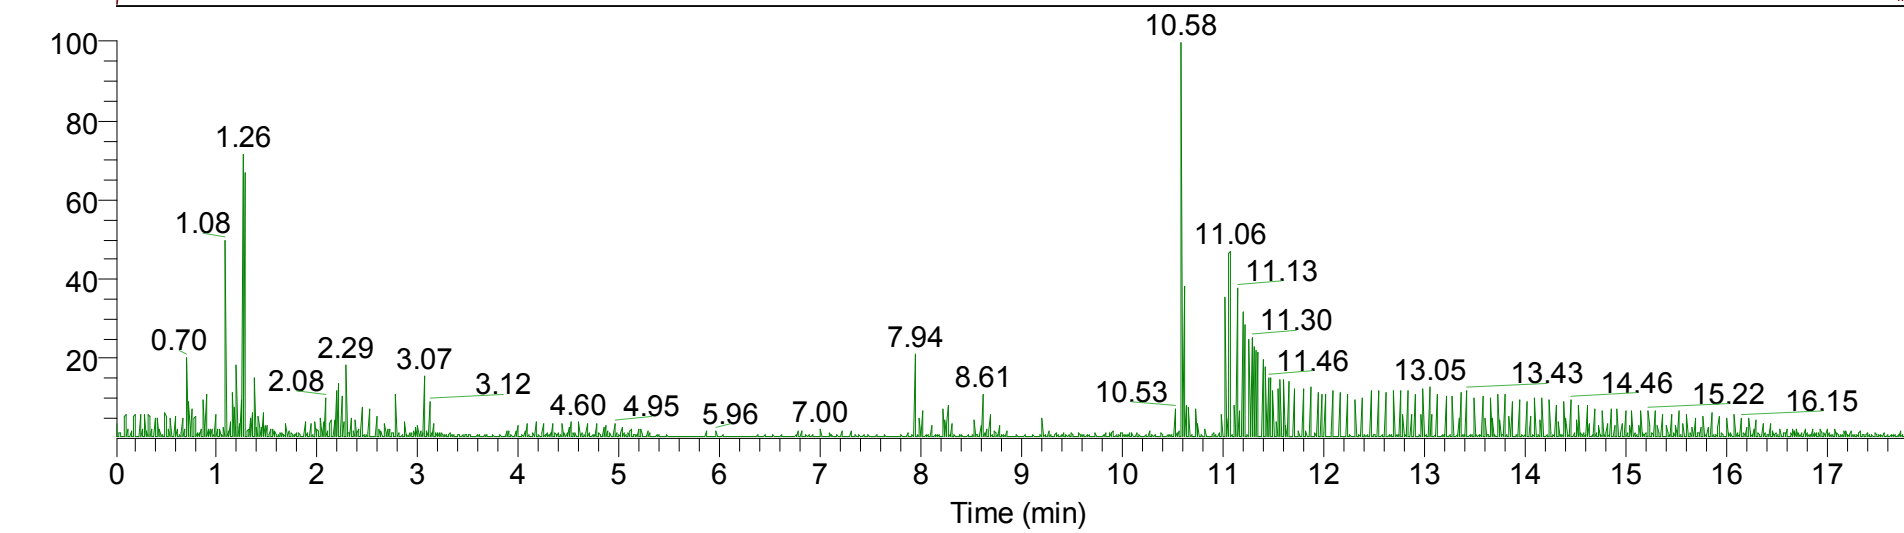

NL:  
9.31E8  
TIC F: Full ms2  
MS  
Hilic\_N\_20220  
118\_2per\_1\_50  
\_1

RT: 0.00 - 17.91

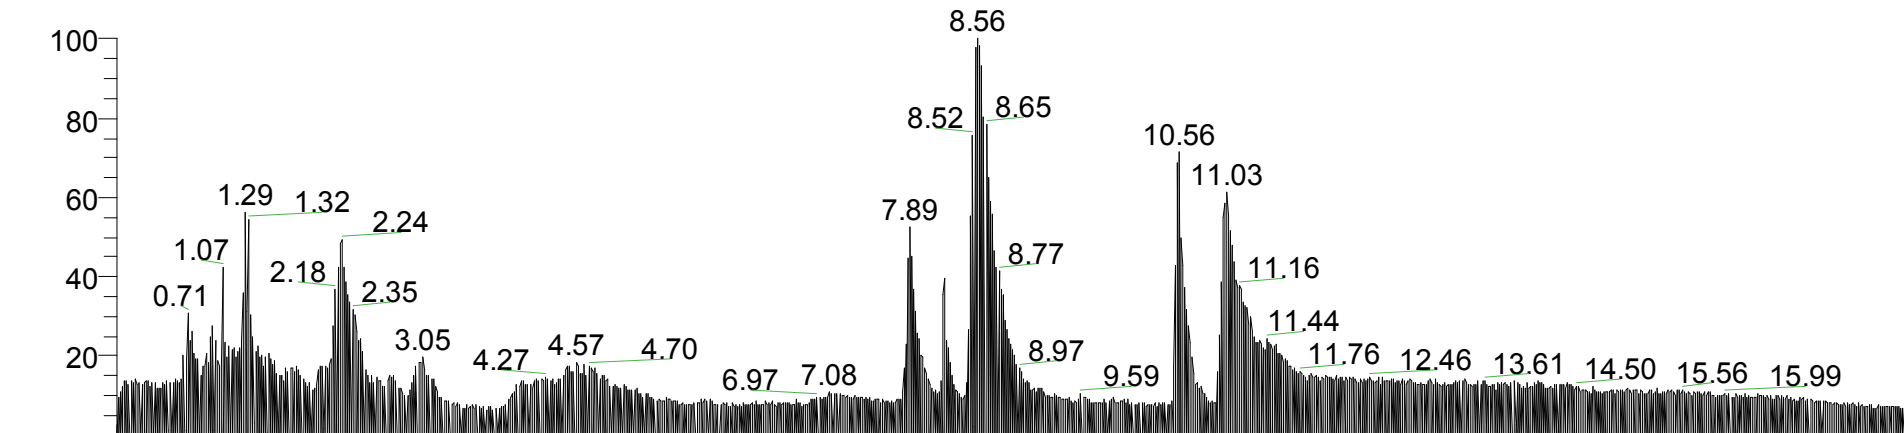

NL:  
4.07E9  
TIC MS  
Hilic\_N\_20220  
118\_2per\_1\_50  
\_2

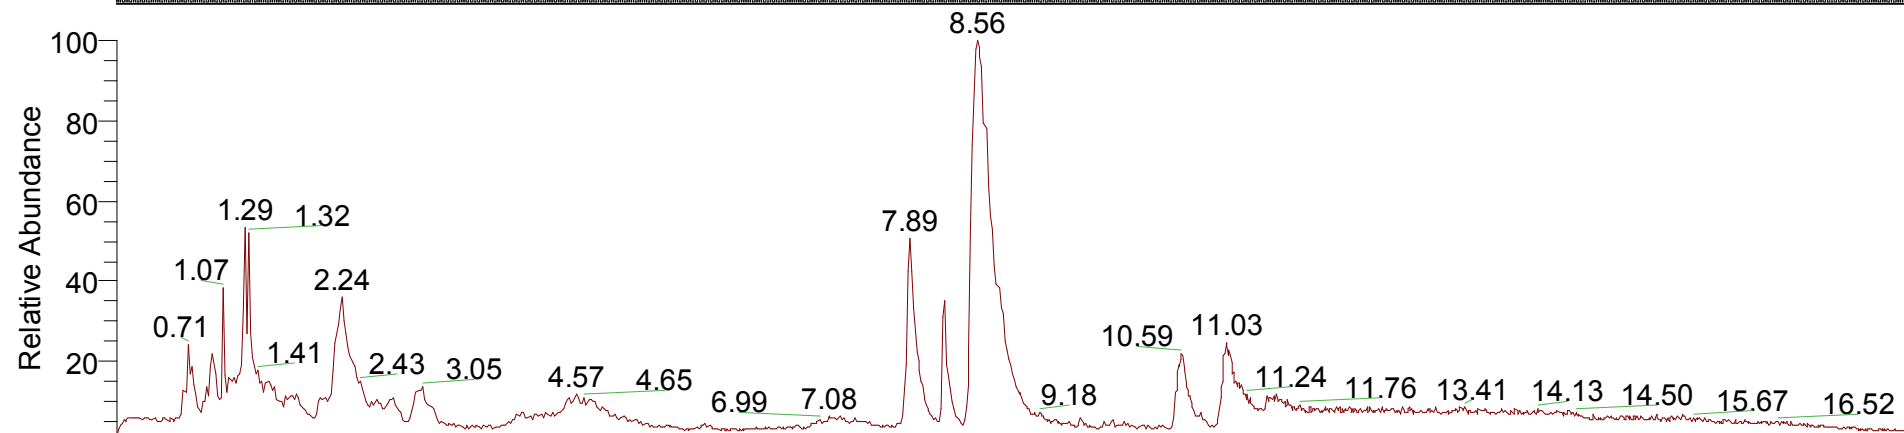

NL:  
3.79E9  
m/z=  
120.00-2000.00  
F: Full ms MS  
Hilic\_N\_20220  
118\_2per\_1\_50  
\_2

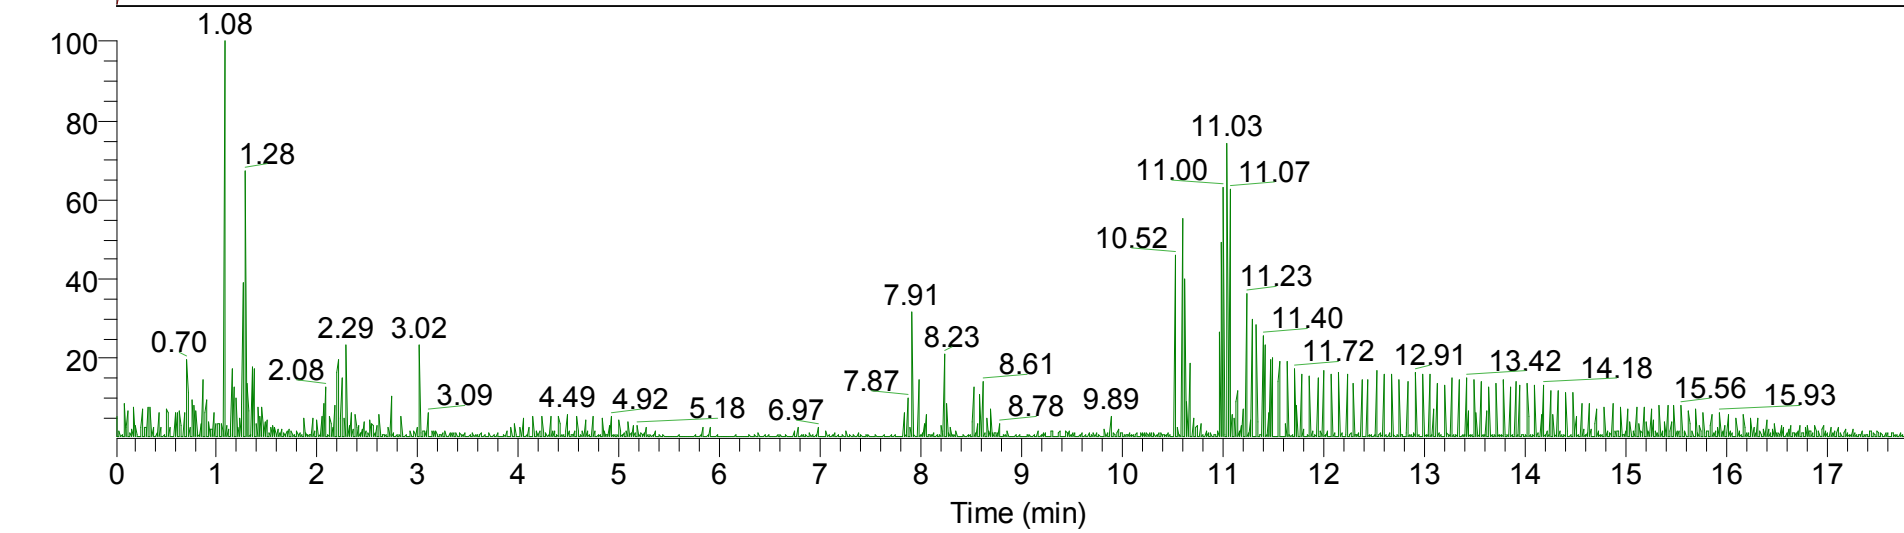

NL:  
6.77E8  
TIC F: Full ms2  
MS  
Hilic\_N\_20220  
118\_2per\_1\_50  
\_2

RT: 0.00 - 17.91

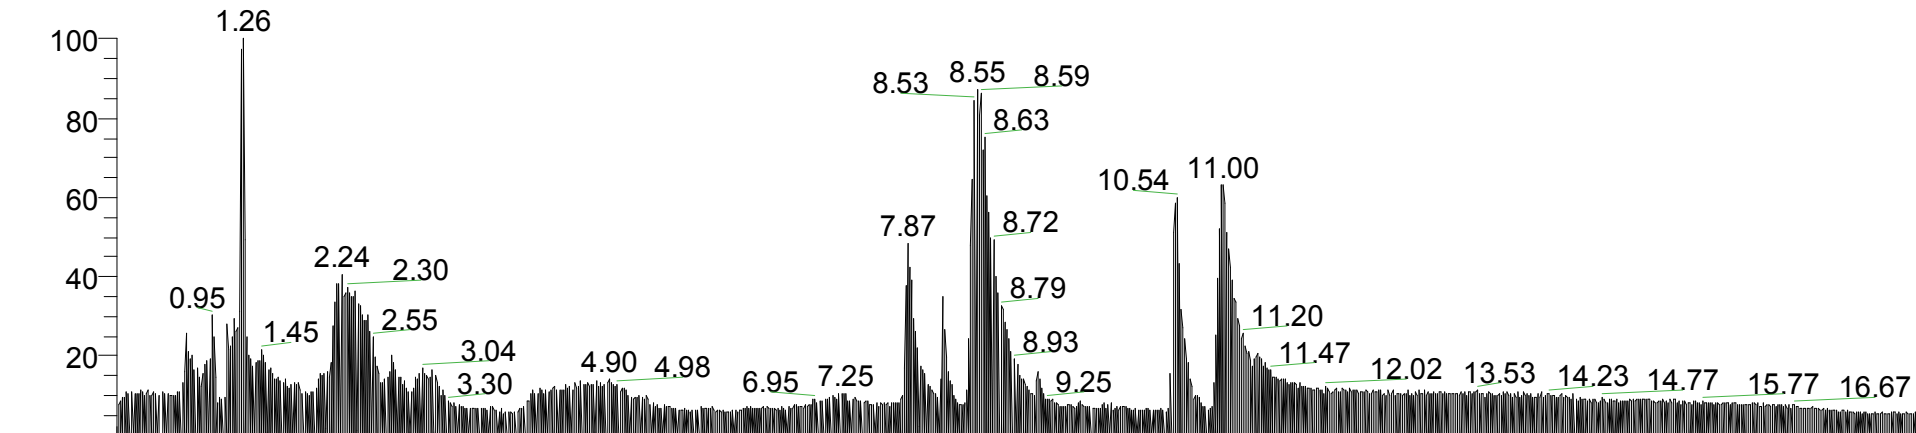

NL:  
5.14E9  
TIC MS  
Hilic\_N\_20220  
118\_2per\_1\_50  
\_3

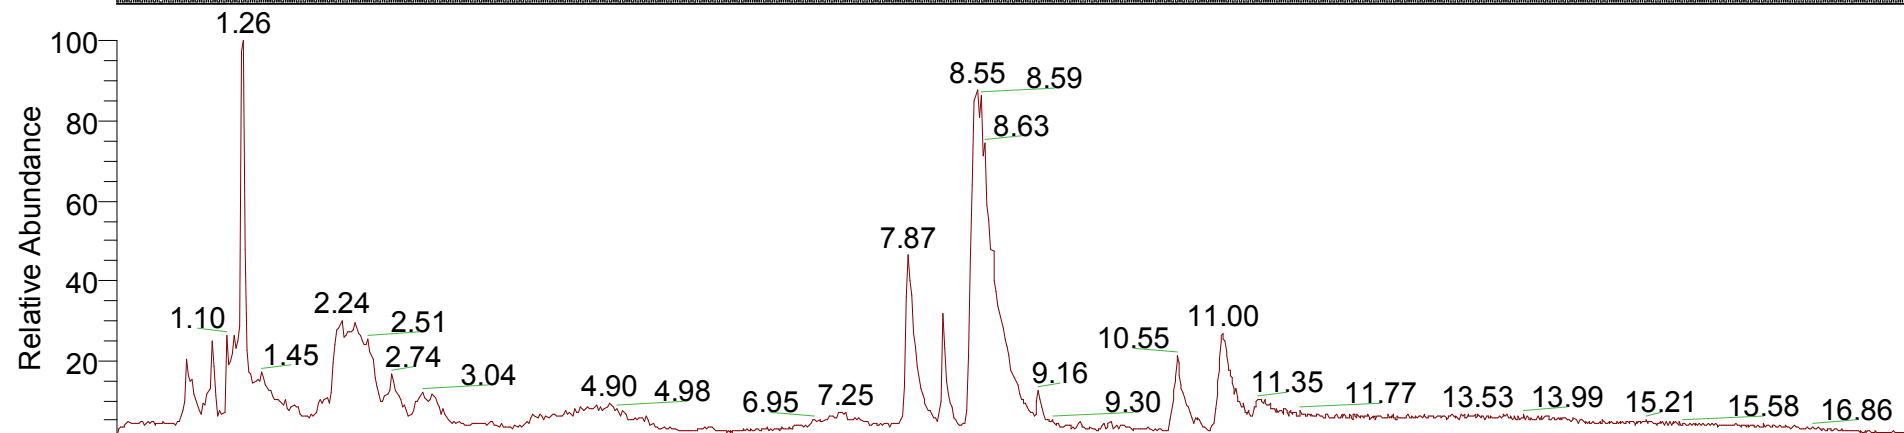

NL:  
4.83E9  
m/z=  
120.00-2000.00  
F: Full ms MS  
Hilic\_N\_20220  
118\_2per\_1\_50  
\_3

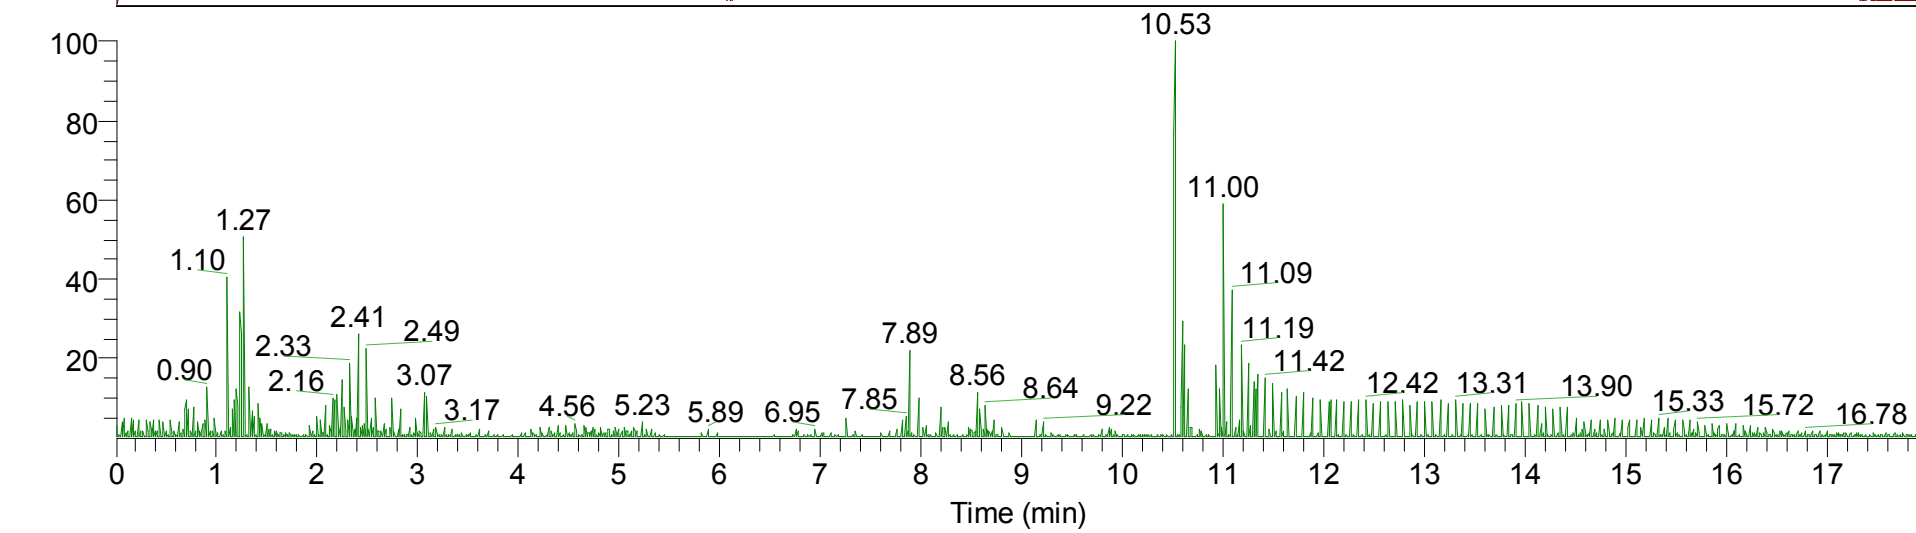

NL:  
1.12E9  
TIC F: Full ms2  
MS  
Hilic\_N\_20220  
118\_2per\_1\_50  
\_3

RT: 0.00 - 17.90

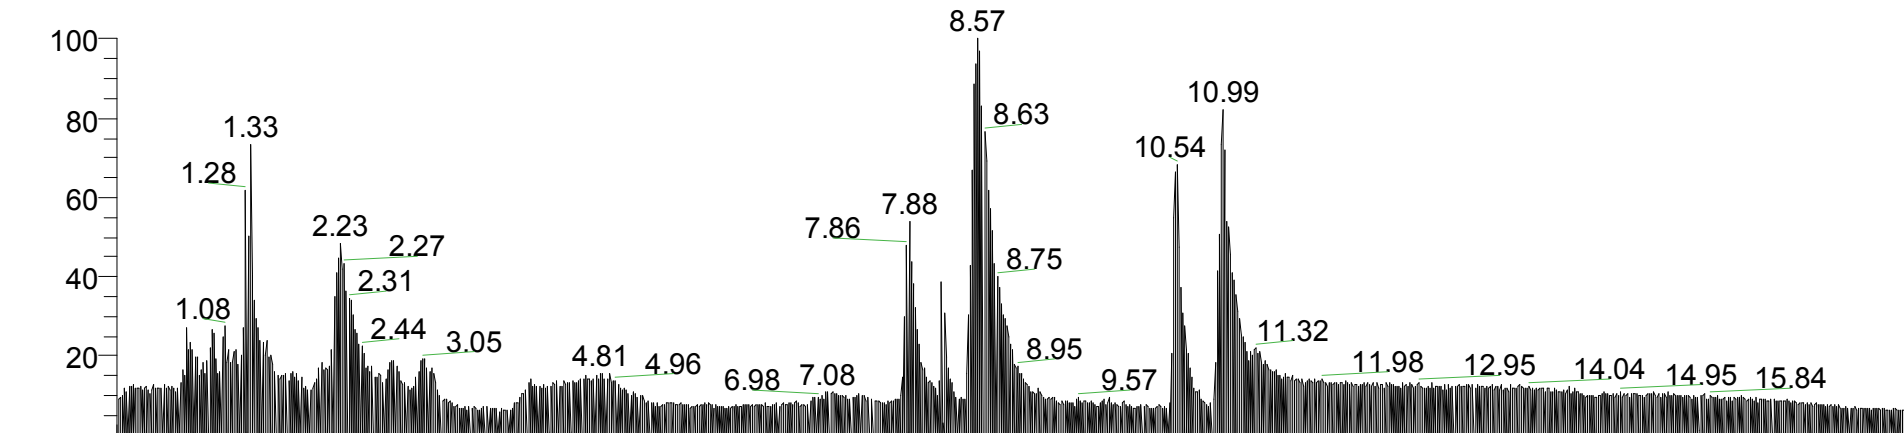

NL:  
4.40E9  
TIC MS  
Hilic\_N\_20220  
118\_2per\_1\_50  
\_4

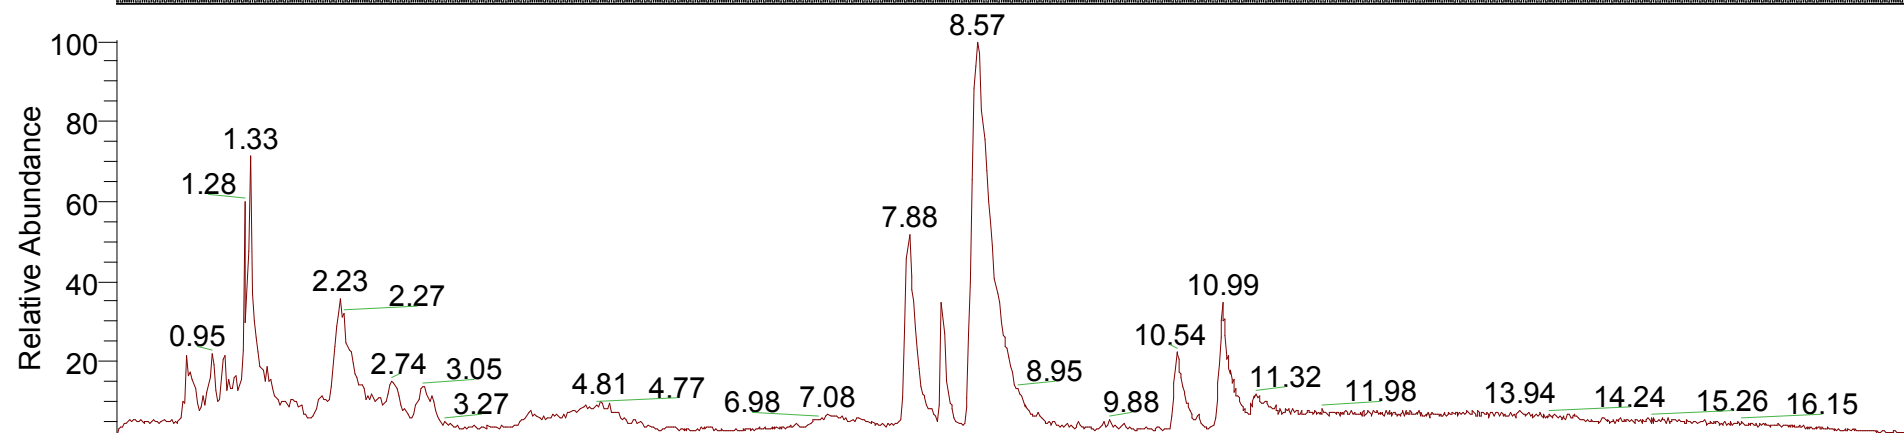

NL:  
4.13E9  
m/z=  
120.00-2000.00  
F: Full ms MS  
Hilic\_N\_20220  
118\_2per\_1\_50  
\_4

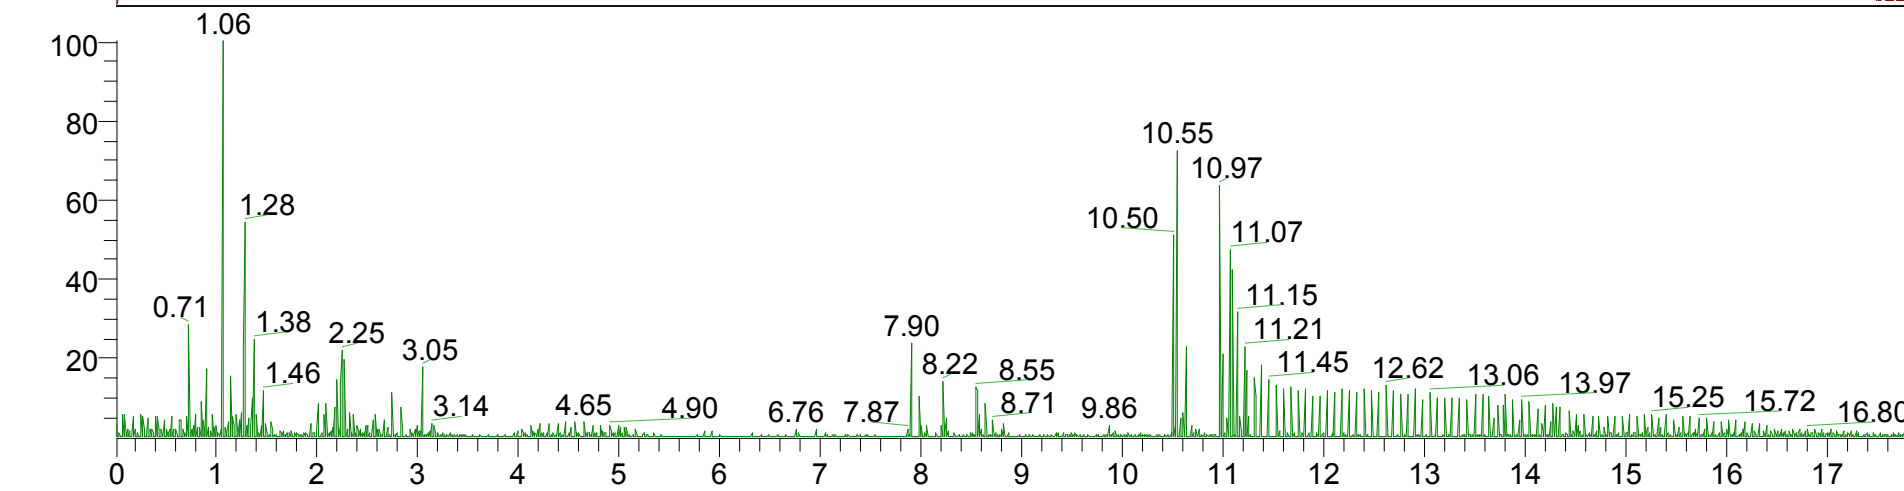

NL:  
9.18E8  
TIC F: Full ms2  
MS  
Hilic\_N\_20220  
118\_2per\_1\_50  
\_4

RT: 0.00 - 17.90

NL:  
4.73E9  
TIC MS  
Hilic\_N\_202201  
18\_2per\_1\_500\_1

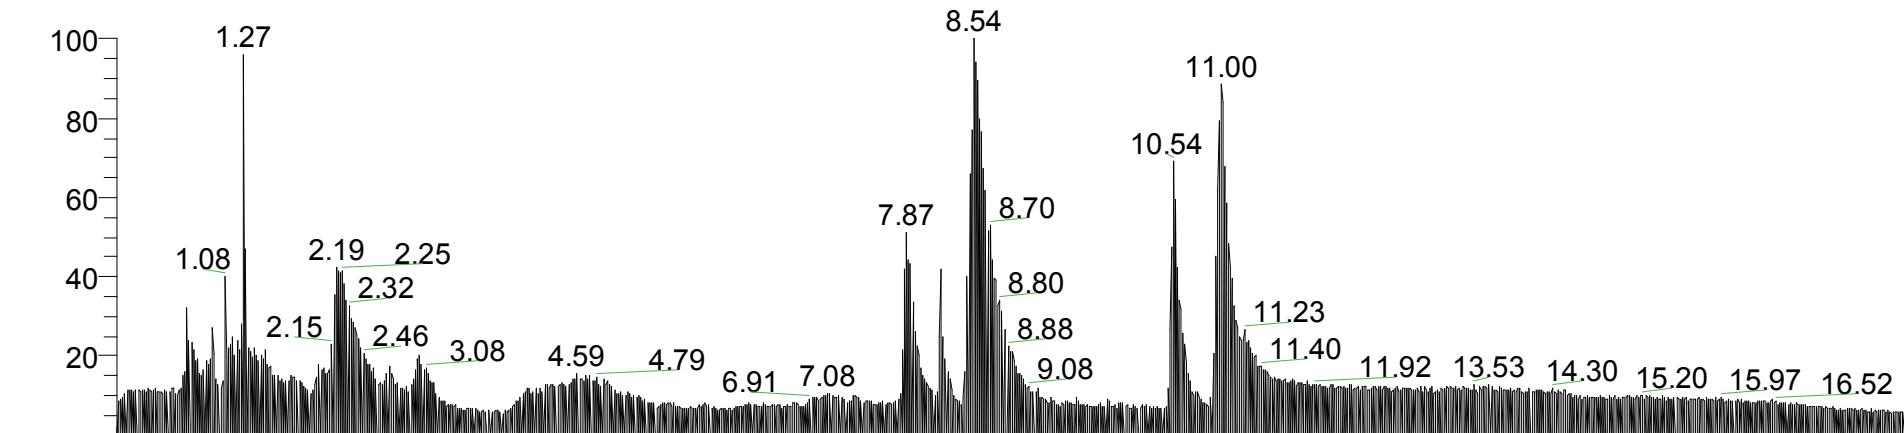

NL:  
4.46E9  
m/z=  
120.00-2000.00  
F: Full ms MS  
Hilic\_N\_202201  
18\_2per\_1\_500\_1

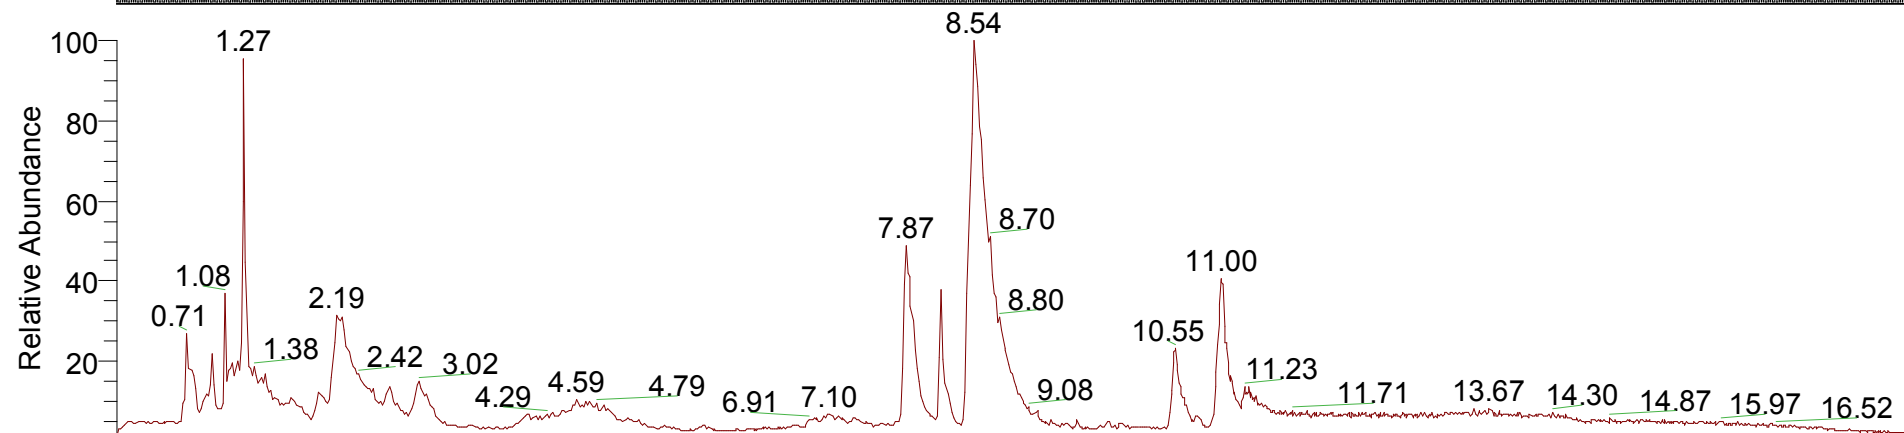

NL:  
8.36E8  
TIC F: Full ms2  
MS  
Hilic\_N\_202201  
18\_2per\_1\_500\_1

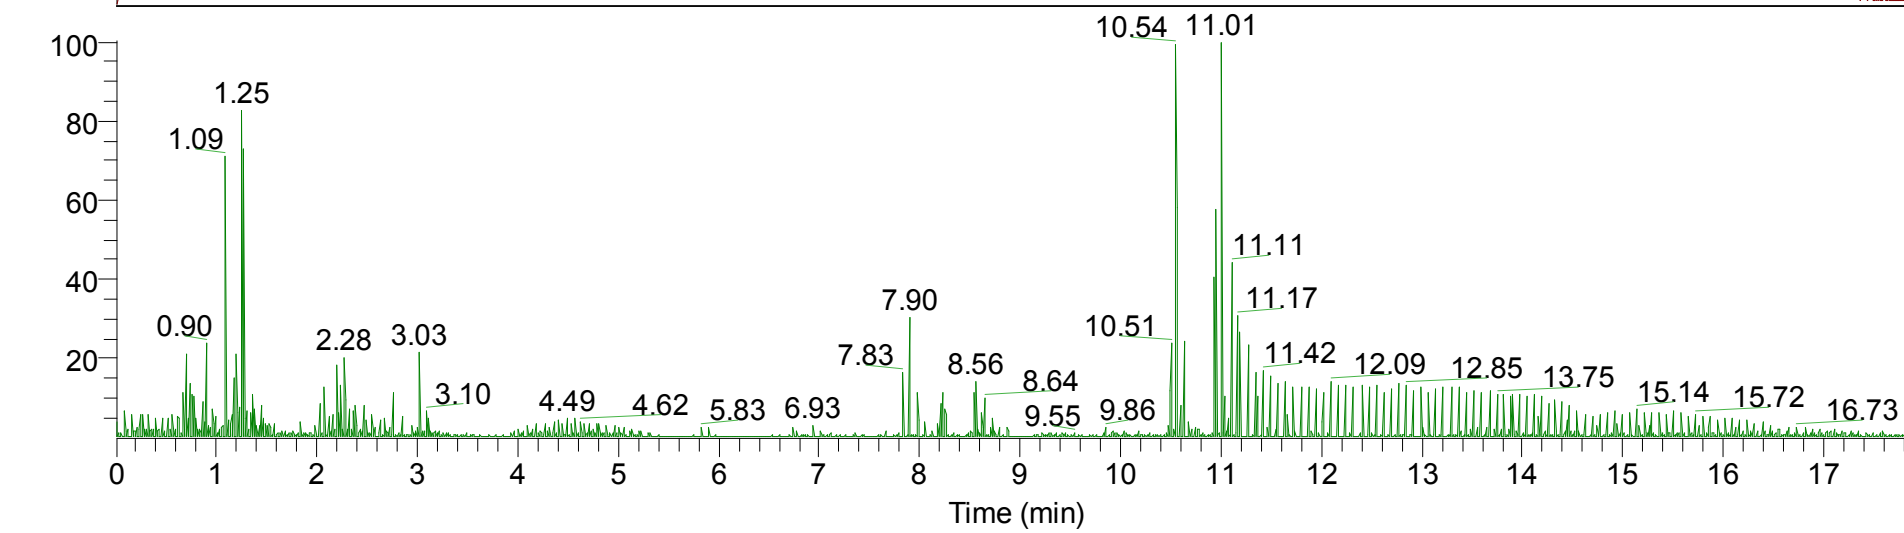

RT: 0.00 - 17.91

NL:  
5.17E9  
TIC MS  
Hilic\_N\_202201  
18\_2per\_1\_500\_  
2

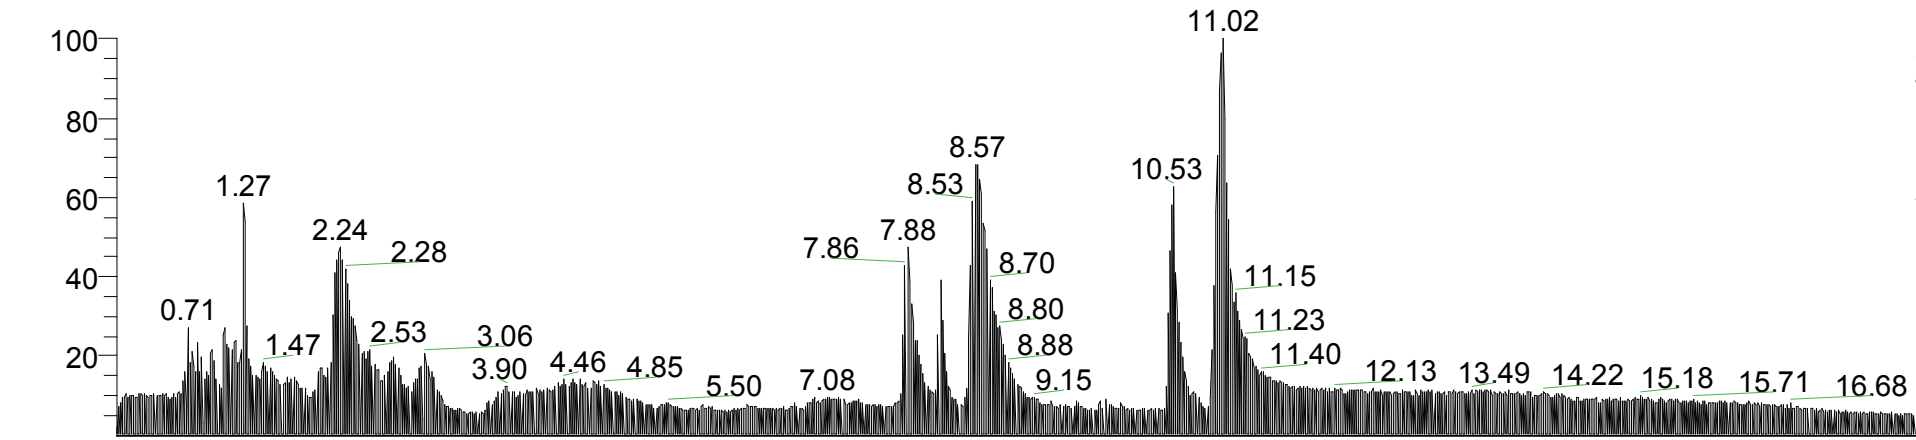

NL:  
3.29E9  
m/z=  
120.00-2000.00  
F: Full ms MS  
Hilic\_N\_202201  
18\_2per\_1\_500\_  
2

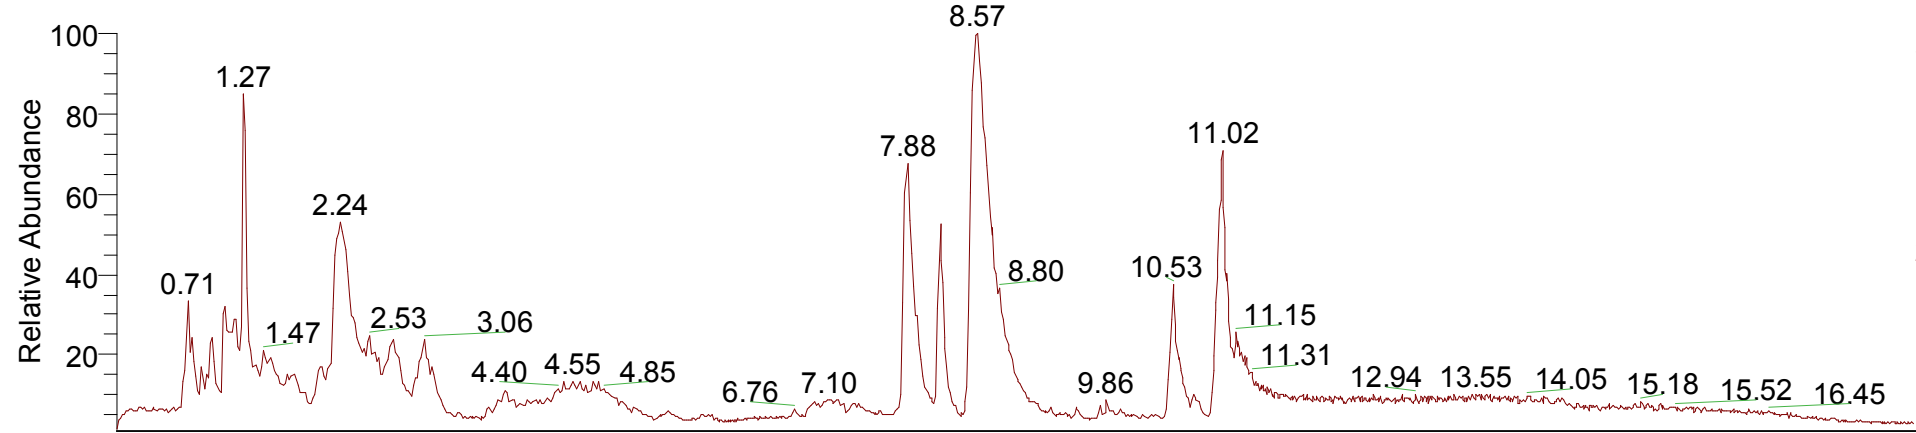

NL:  
1.32E9  
TIC F: Full ms2  
MS  
Hilic\_N\_202201  
18\_2per\_1\_500\_  
2

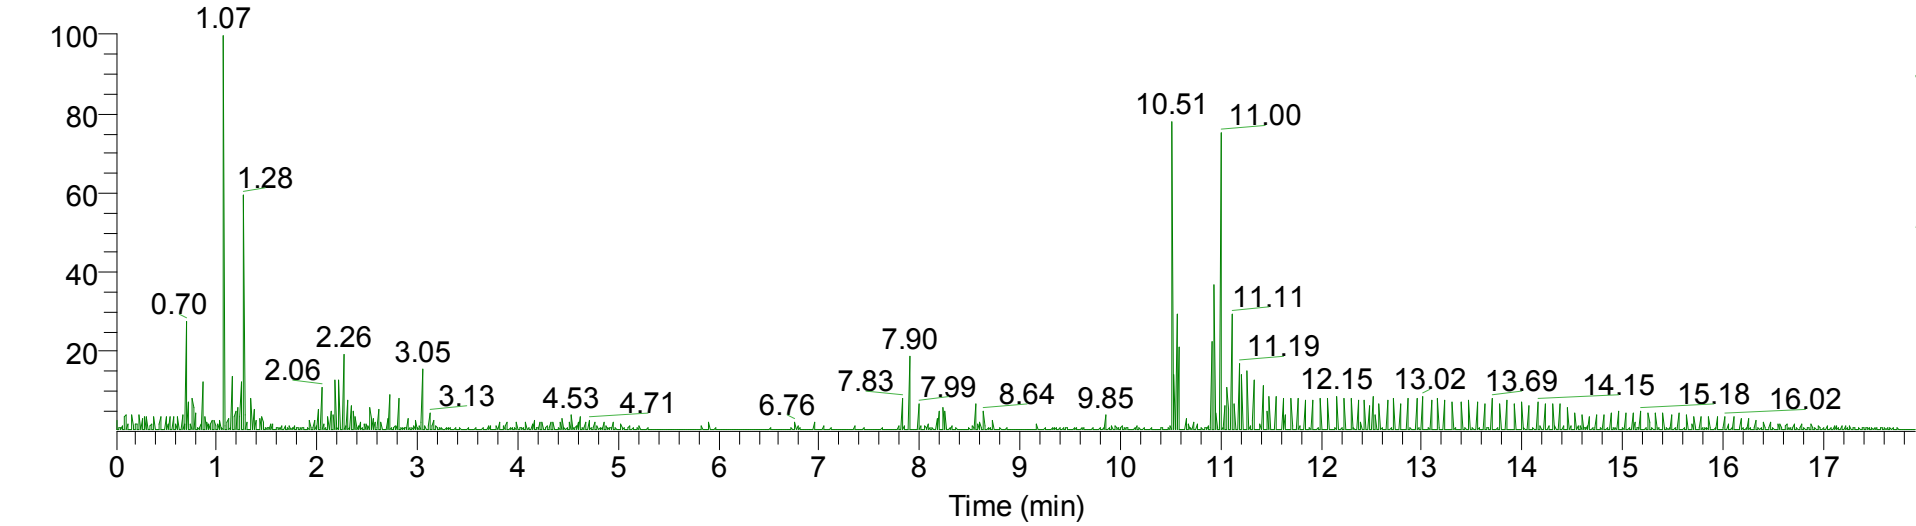

RT: 0.00 - 17.91

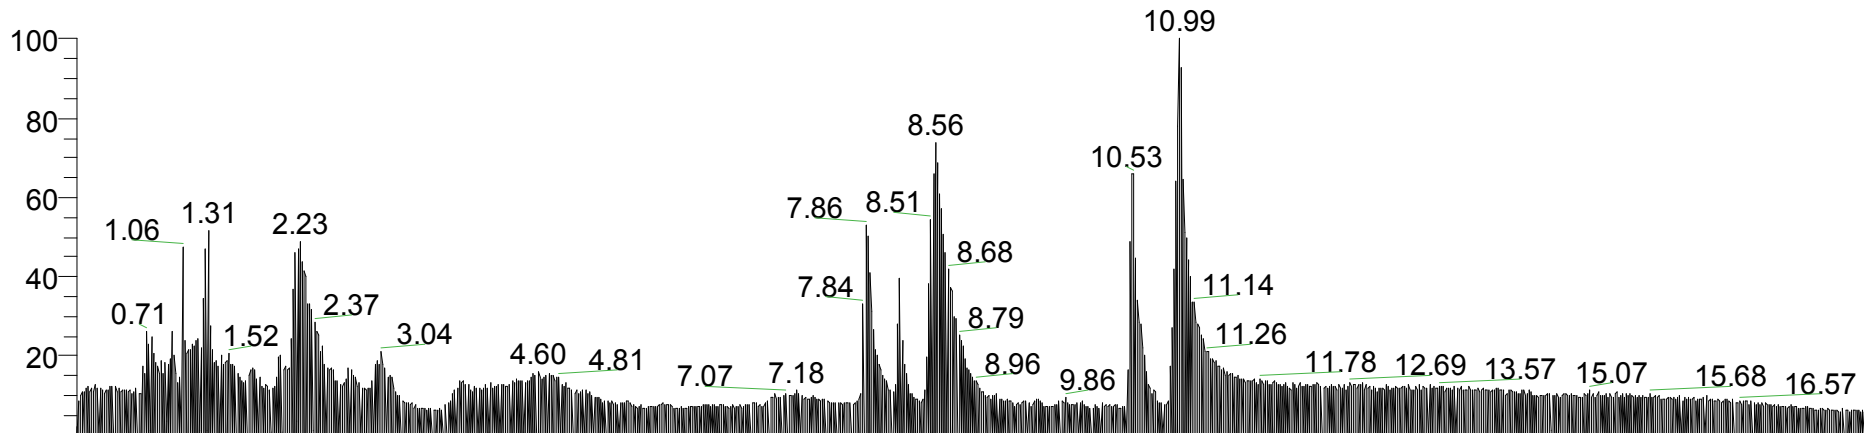

NL:  
4.52E9  
TIC MS  
Hilic\_N\_202201  
18\_2per\_1\_500\_  
3

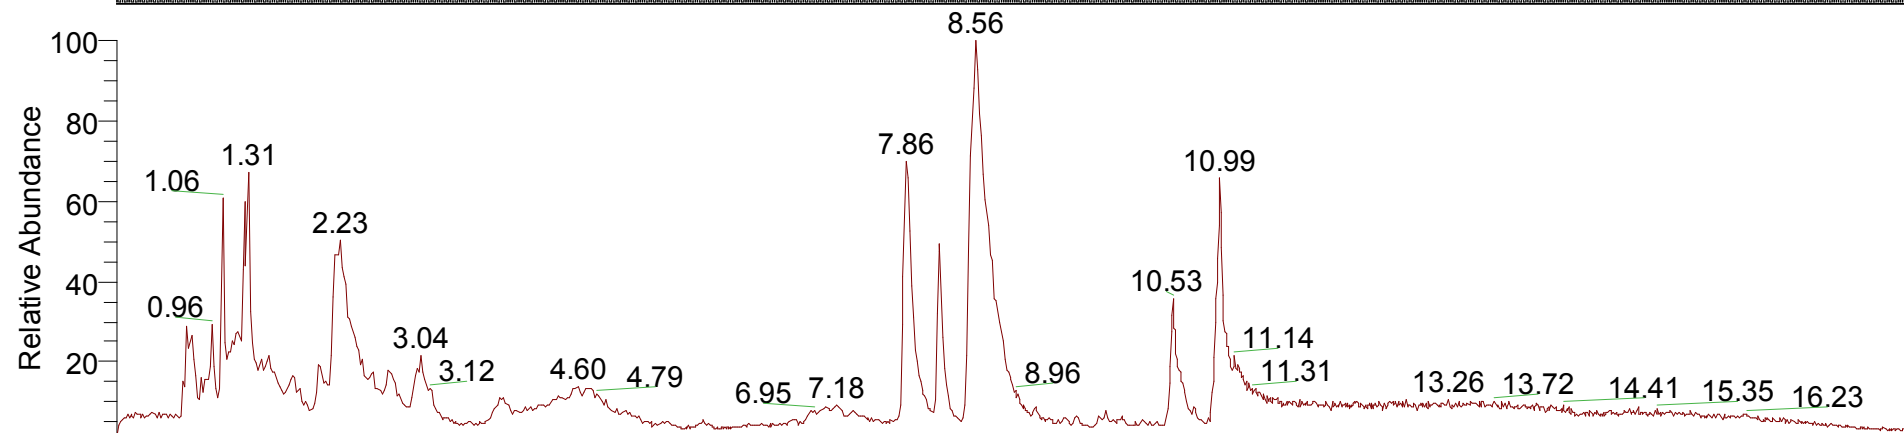

NL:  
3.09E9  
m/z=  
120.00-2000.00  
F: Full ms MS  
Hilic\_N\_202201  
18\_2per\_1\_500\_  
3

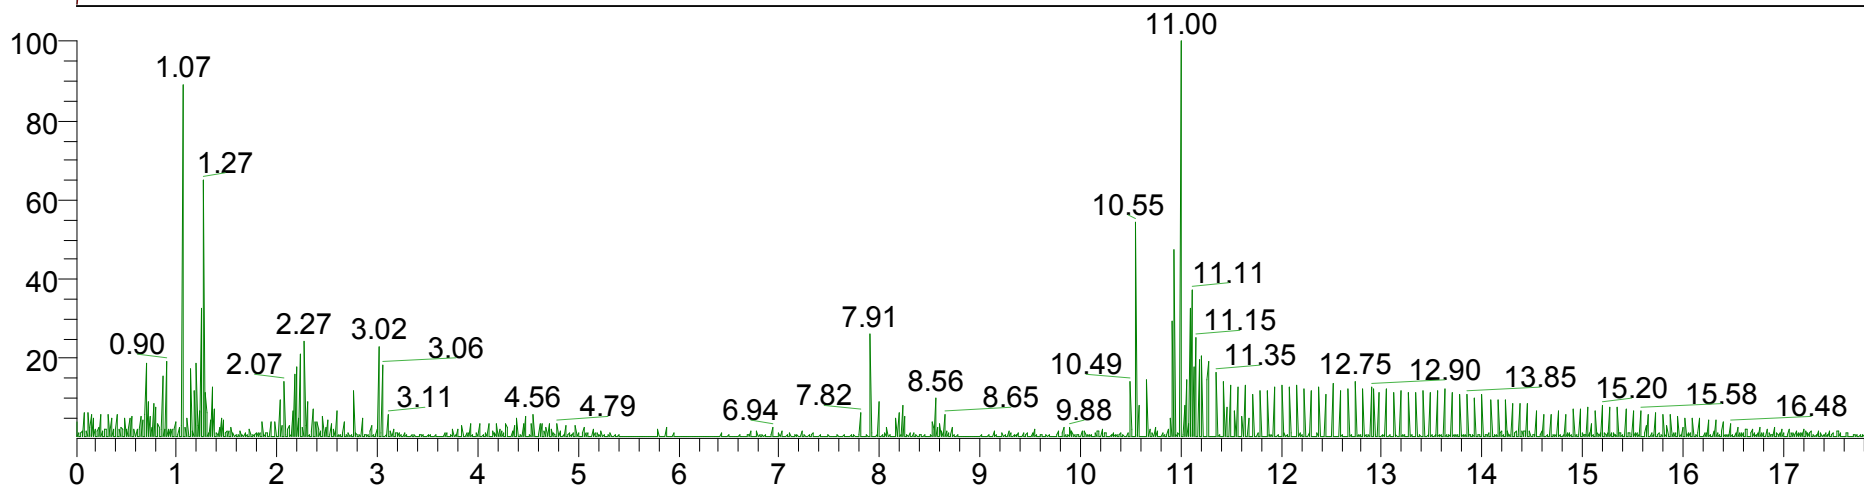

NL:  
8.32E8  
TIC F: Full ms2  
MS  
Hilic\_N\_202201  
18\_2per\_1\_500\_  
3

RT: 0.00 - 17.90

NL:  
4.30E9  
TIC MS  
Hilic\_N\_202201  
18\_2per\_1\_500\_  
4

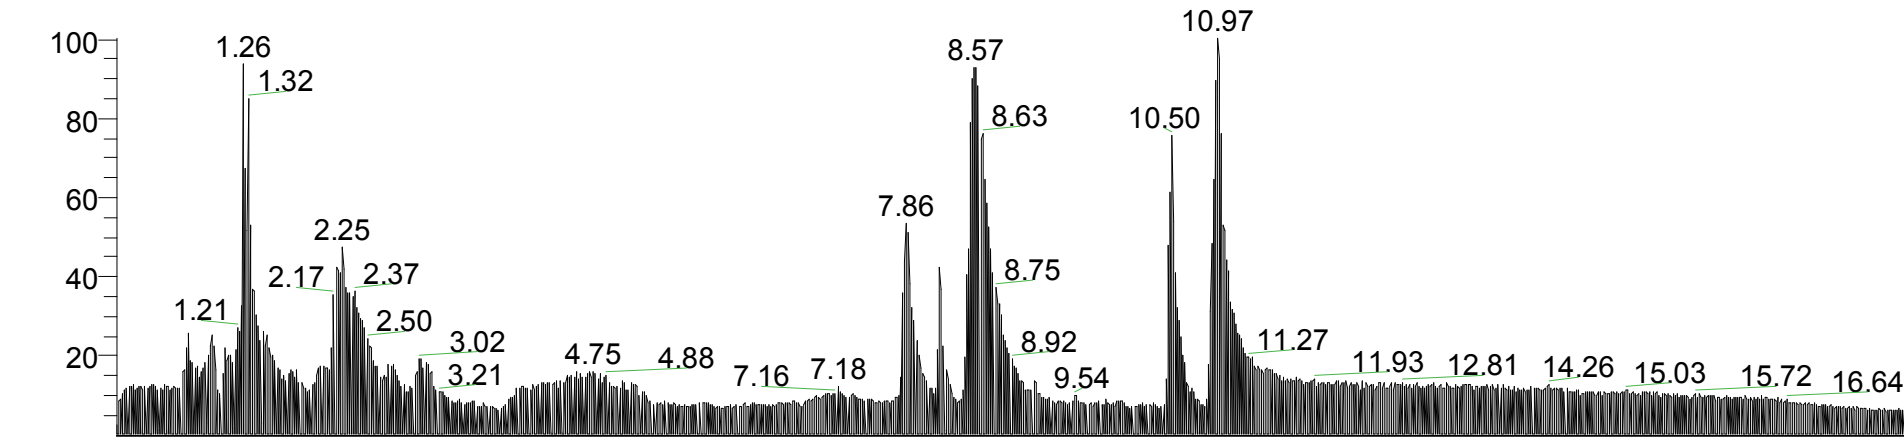

NL:  
3.72E9  
m/z=  
120.00-2000.00  
F: Full ms MS  
Hilic\_N\_202201  
18\_2per\_1\_500\_  
4

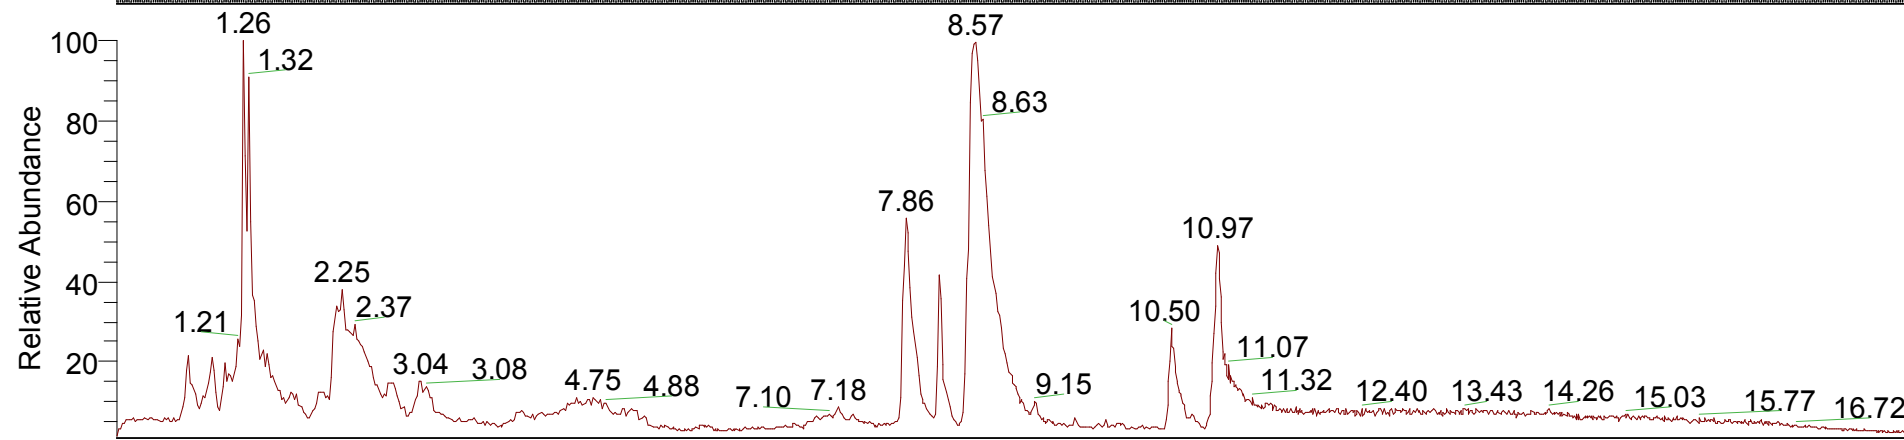

NL:  
9.29E8  
TIC F: Full ms2  
MS  
Hilic\_N\_202201  
18\_2per\_1\_500\_  
4

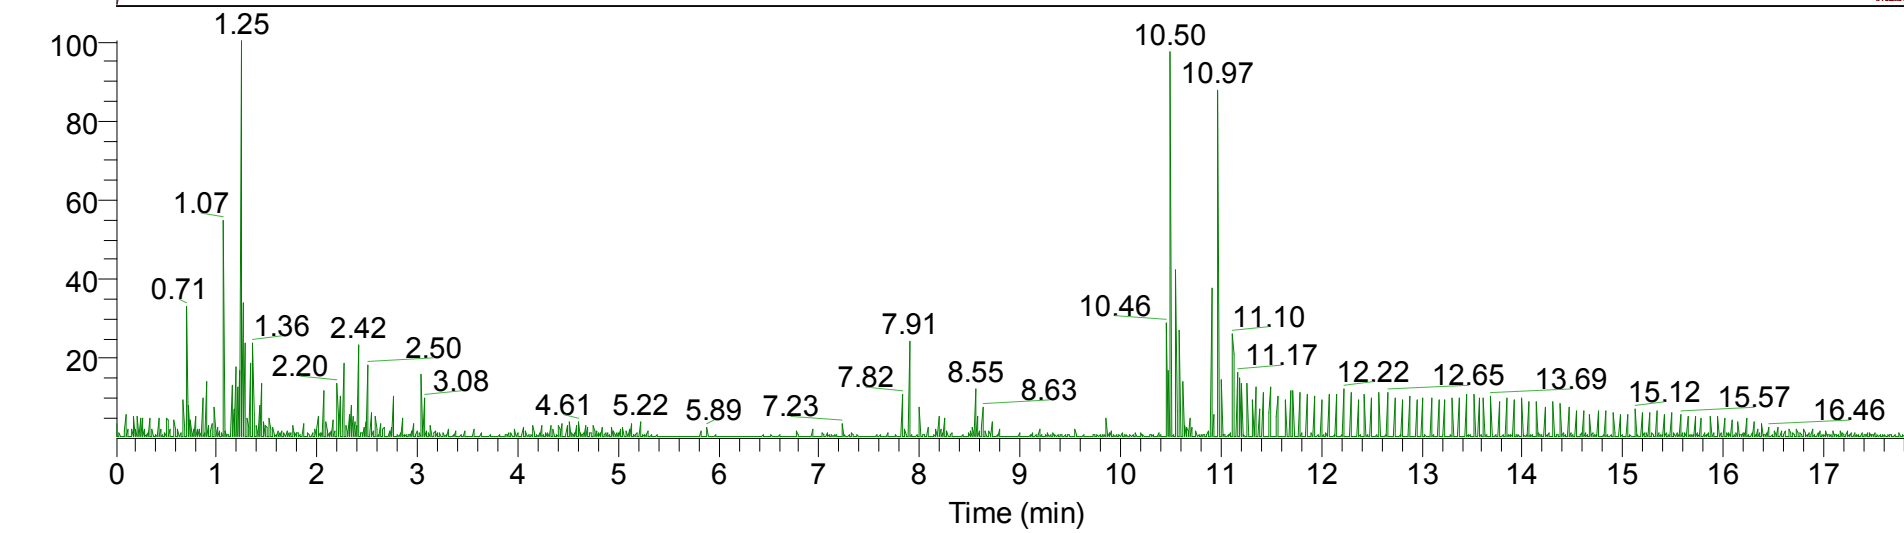



RT: 0.00 - 17.90

NL:  
4.83E9  
TIC MS  
Hilic\_N\_20220  
118\_2per\_M1

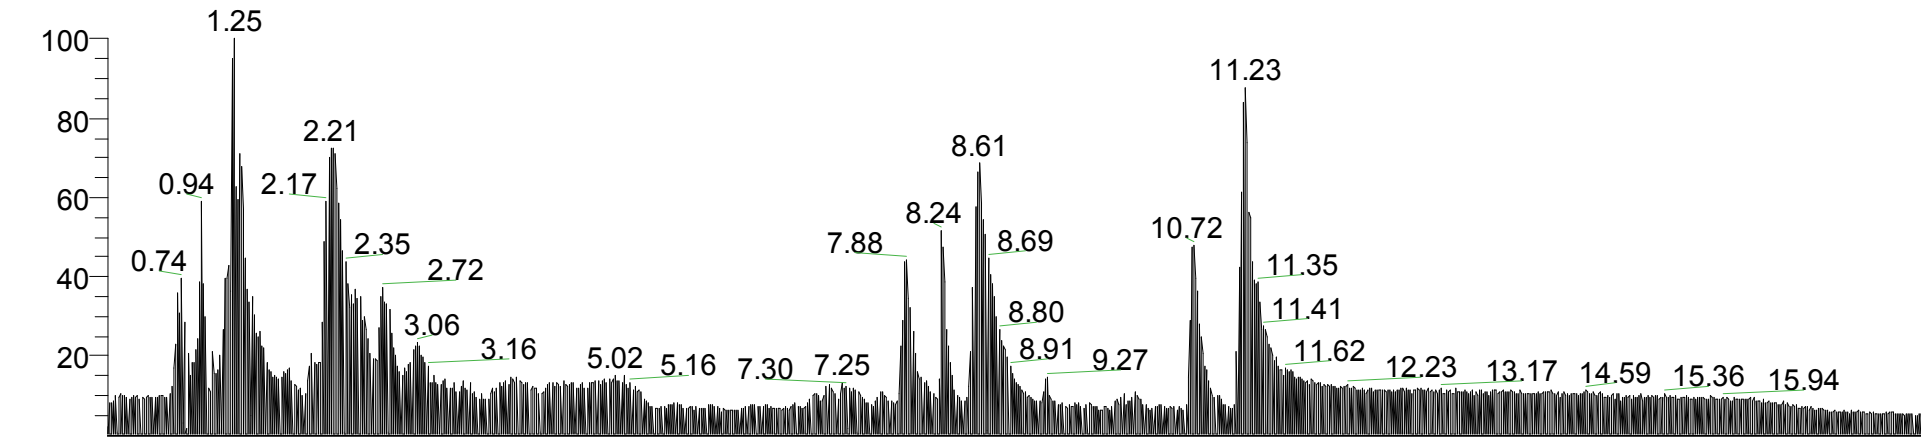

NL:  
4.54E9  
m/z=  
120.00-  
2000.00 F: Full  
ms MS  
Hilic\_N\_20220  
118\_2per\_M1

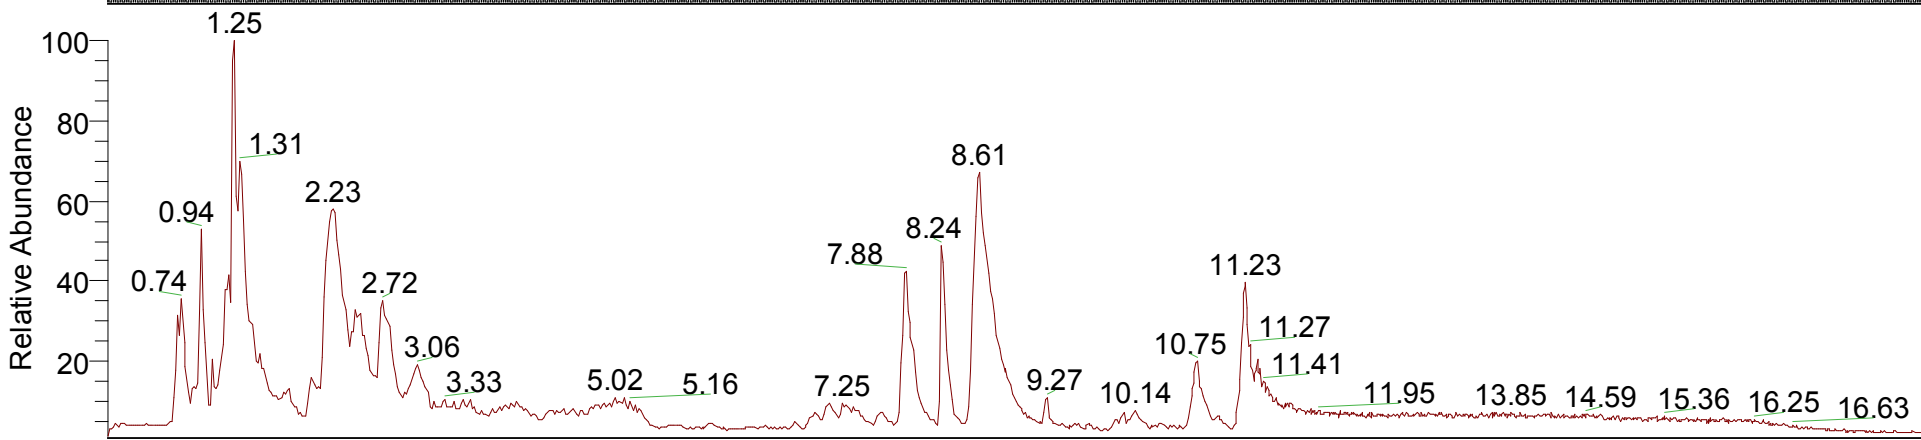

NL:  
1.97E9  
TIC F: Full ms2  
MS  
Hilic\_N\_20220  
118\_2per\_M1

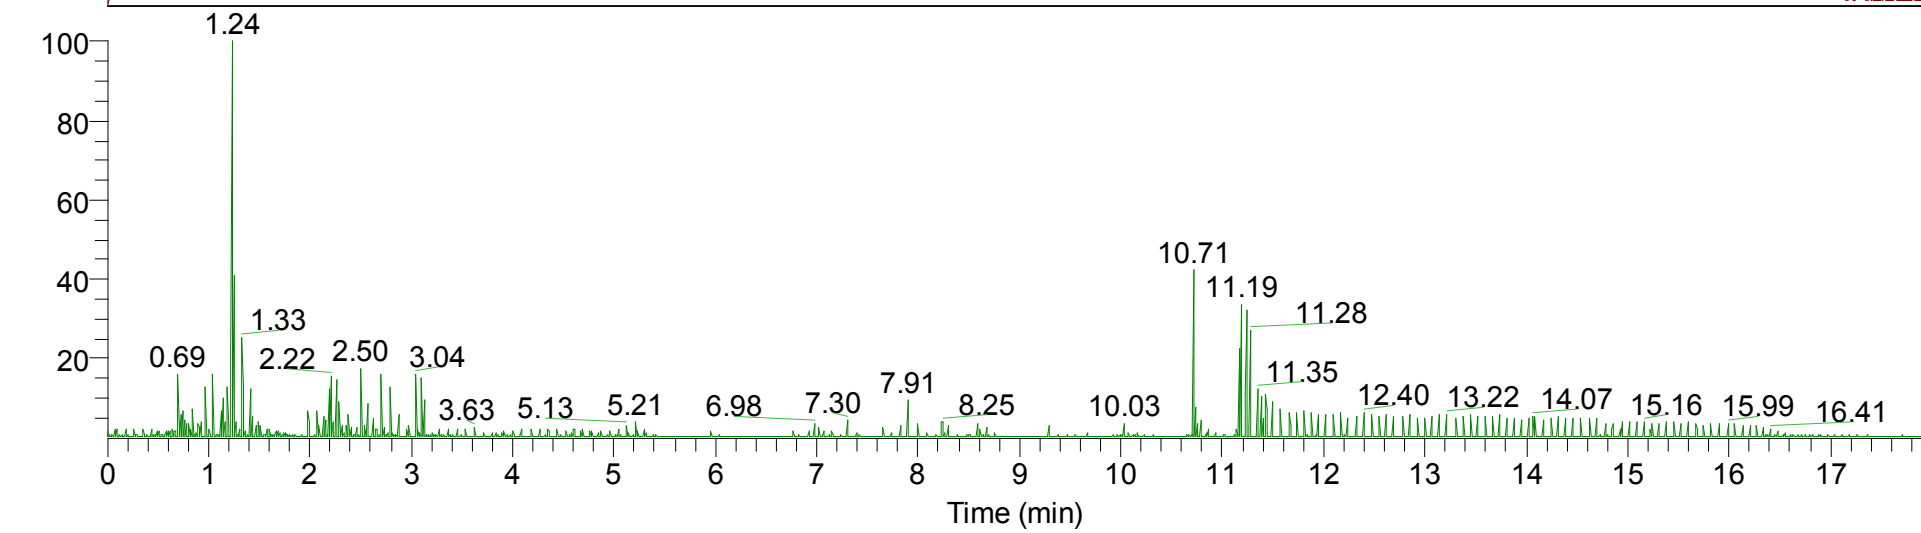

RT: 0.00 - 17.90

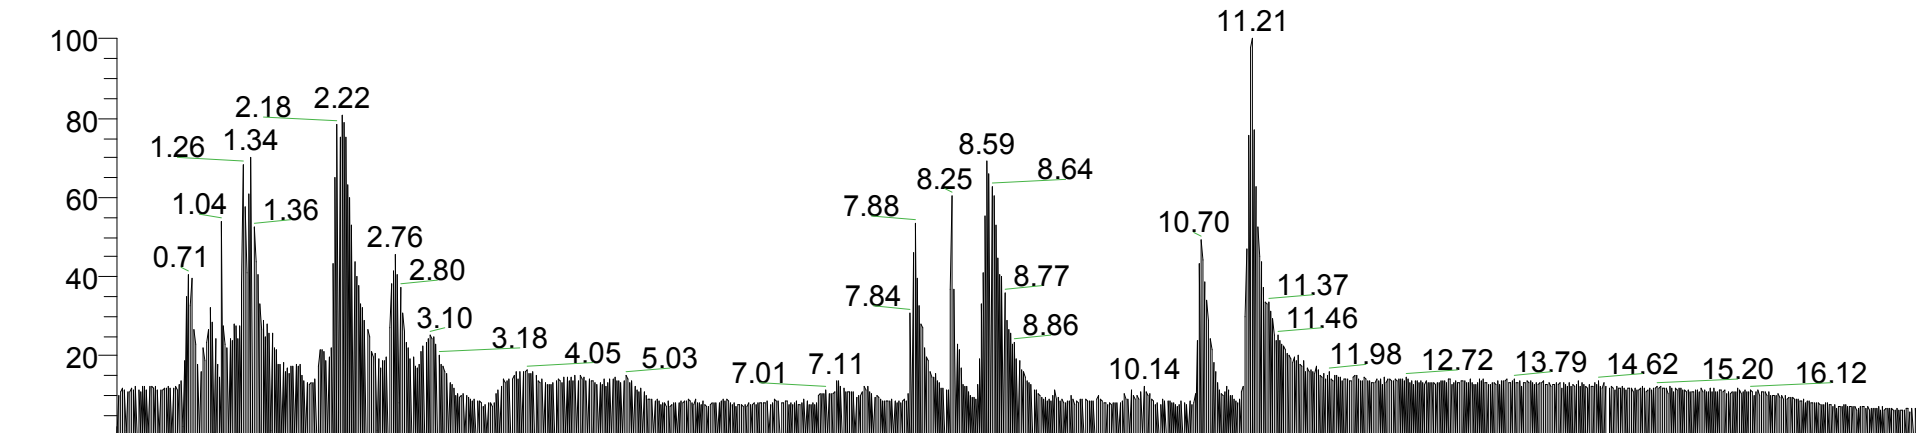

NL:  
4.02E9  
TIC MS  
Hilic\_N\_20220  
118\_2per\_M2

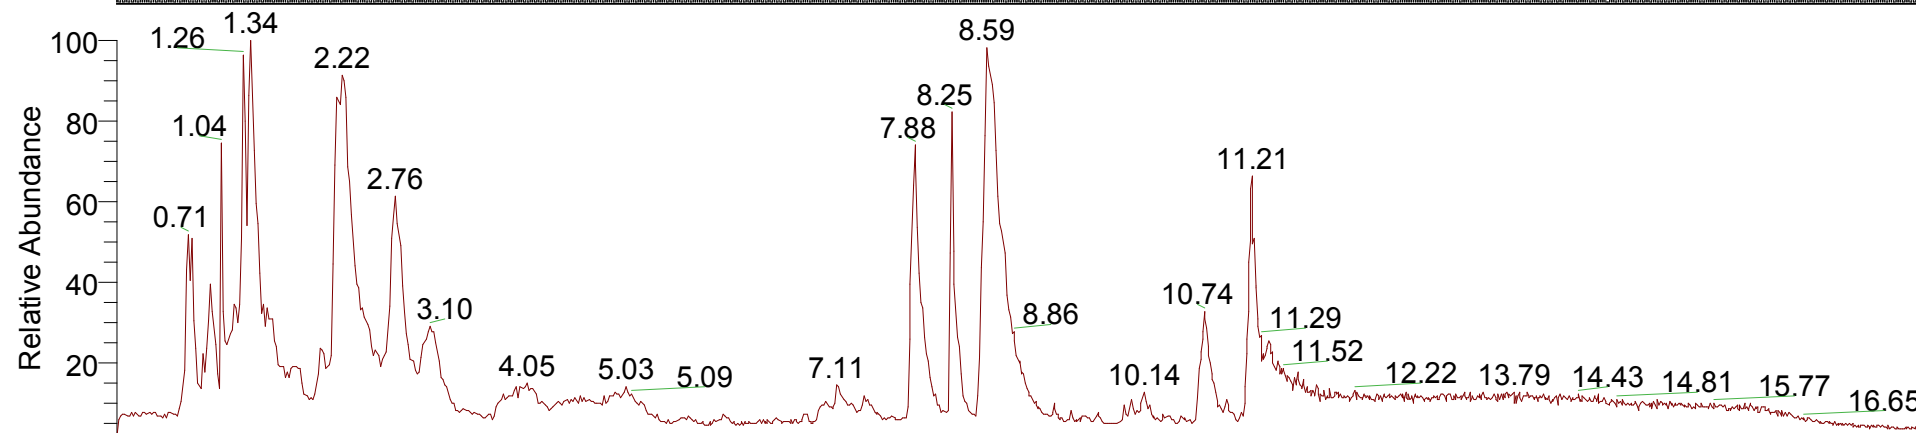

NL:  
2.57E9  
m/z=  
120.00-  
2000.00 F: Full  
ms MS  
Hilic\_N\_20220  
118\_2per\_M2

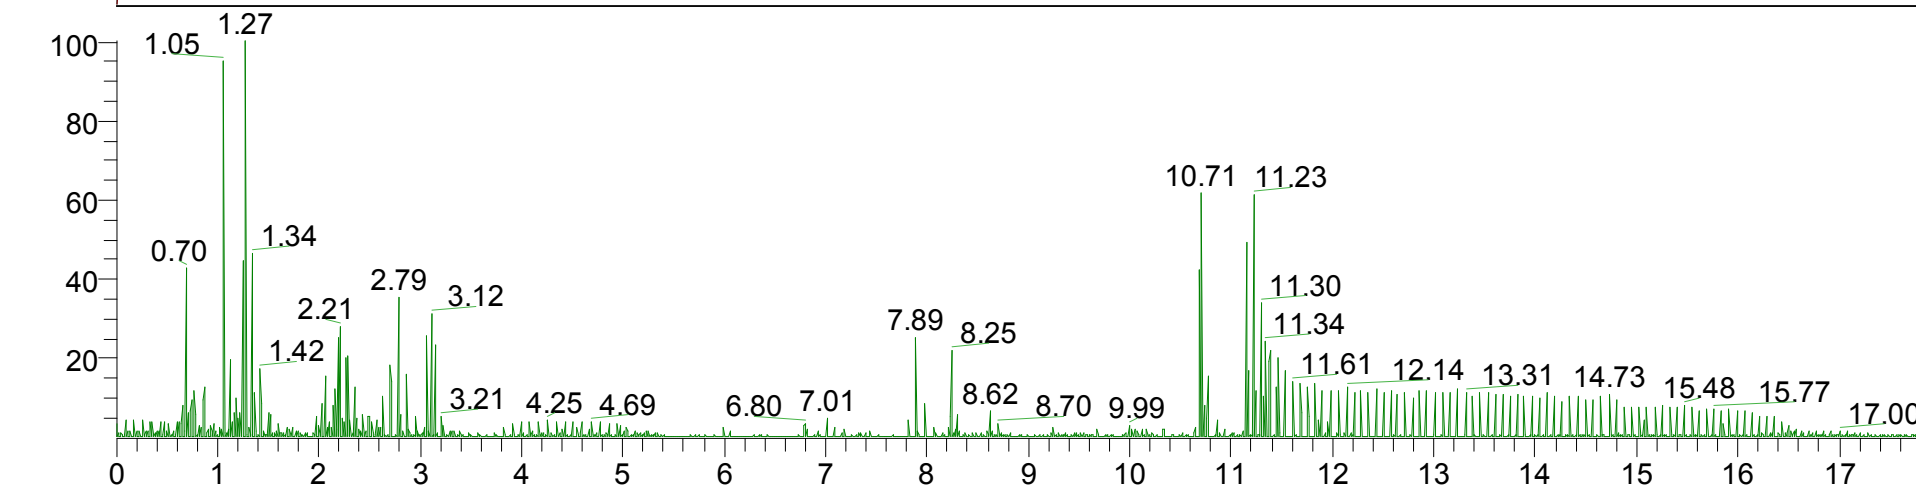

NL:  
9.43E8  
TIC F: Full ms2  
MS  
Hilic\_N\_20220  
118\_2per\_M2

Time (min)

RT: 0.00 - 17.90

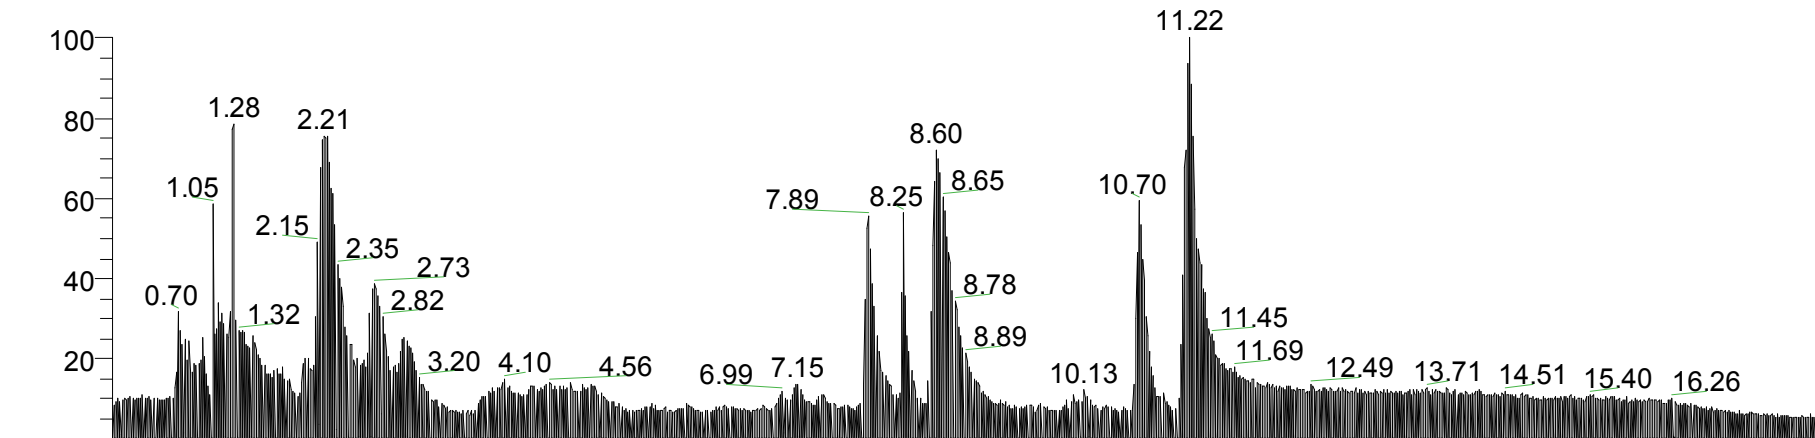

NL:  
4.59E9  
TIC MS  
Hilic\_N\_20220  
118\_2per\_M3

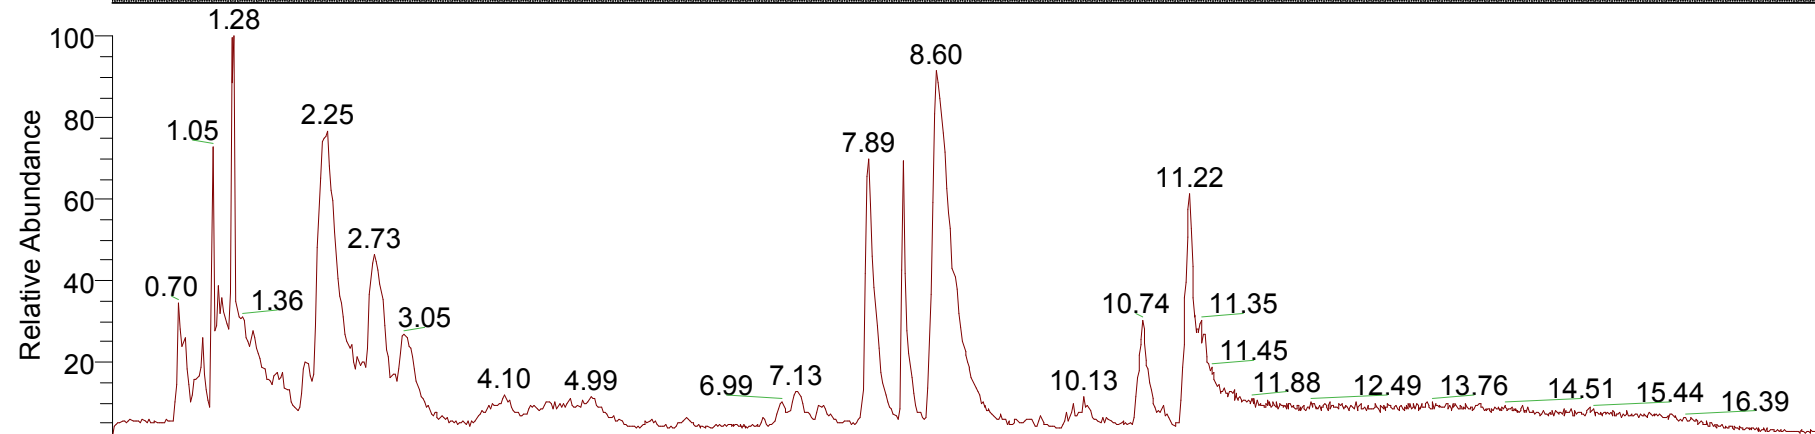

NL:  
3.34E9  
m/z=  
120.00-  
2000.00 F: Full  
ms MS  
Hilic\_N\_20220  
118\_2per\_M3

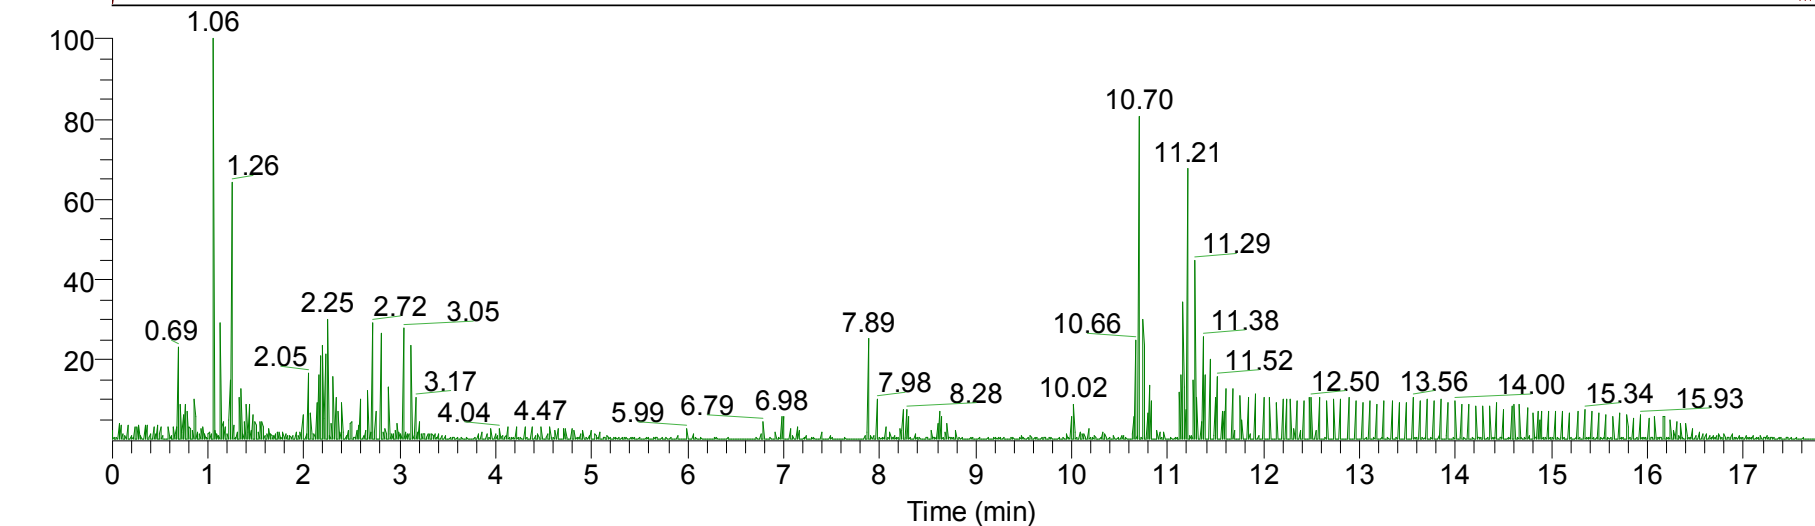

NL:  
1.10E9  
TIC F: Full ms2  
MS  
Hilic\_N\_20220  
118\_2per\_M3

RT: 0.00 - 17.90

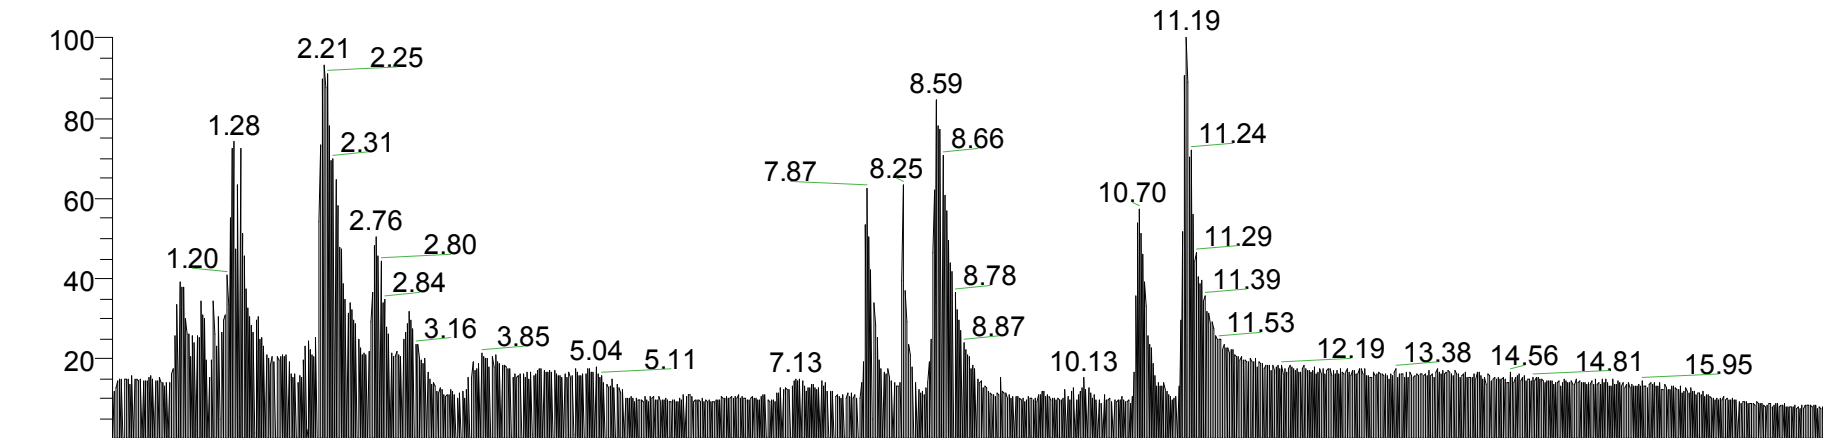

NL:  
3.18E9  
TIC MS  
Hilic\_N\_20220  
118\_2per\_M4

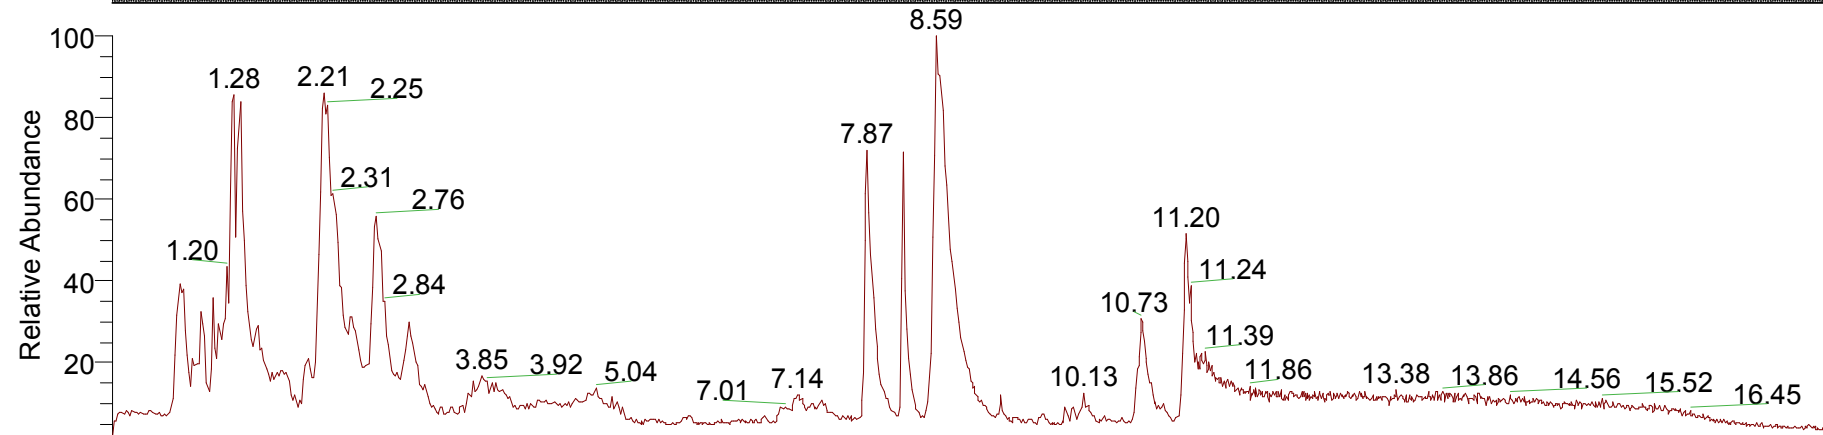

NL:  
2.47E9  
m/z=  
120.00-  
2000.00 F: Full  
ms MS  
Hilic\_N\_20220  
118\_2per\_M4

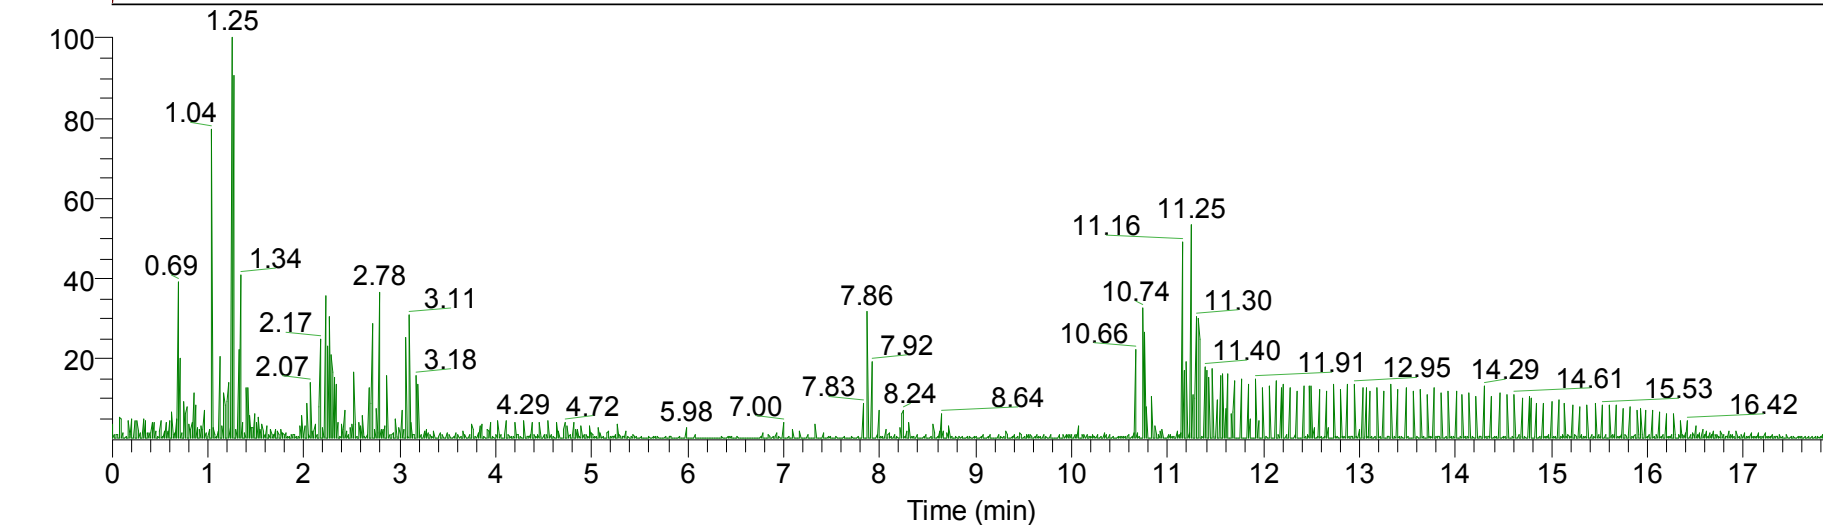

NL:  
8.02E8  
TIC F: Full ms2  
MS  
Hilic\_N\_20220  
118\_2per\_M4

RT: 0.00 - 17.90

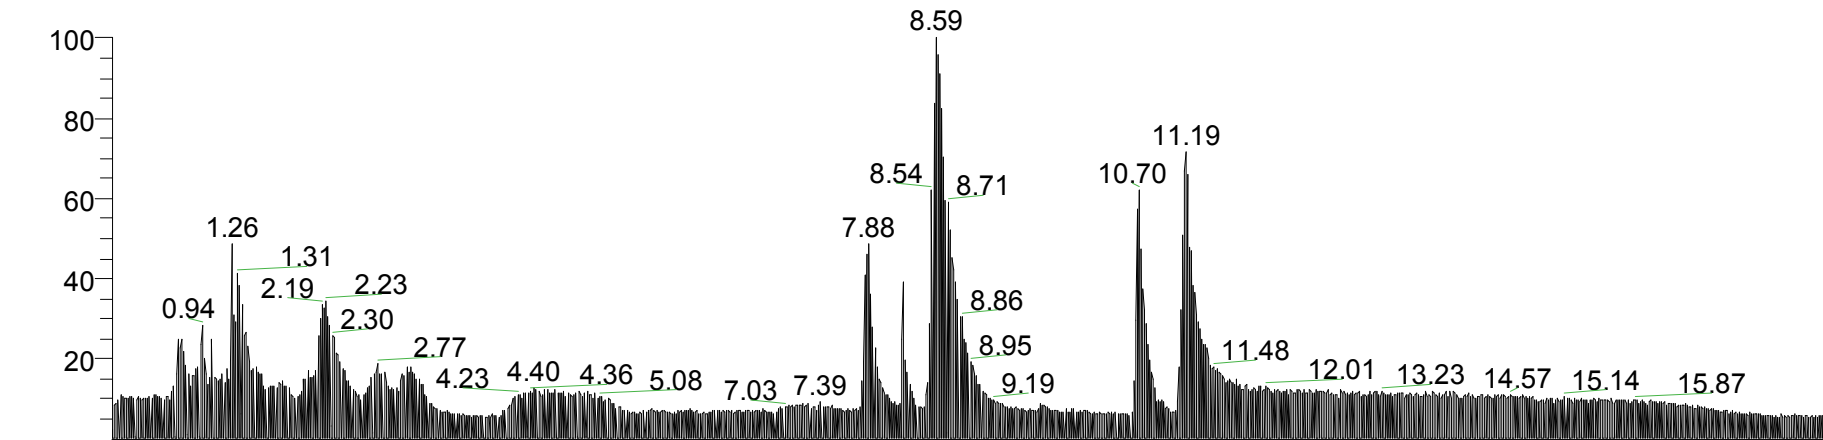

NL:  
4.43E9  
TIC MS  
Hilic\_N\_20220  
118\_2per\_S1

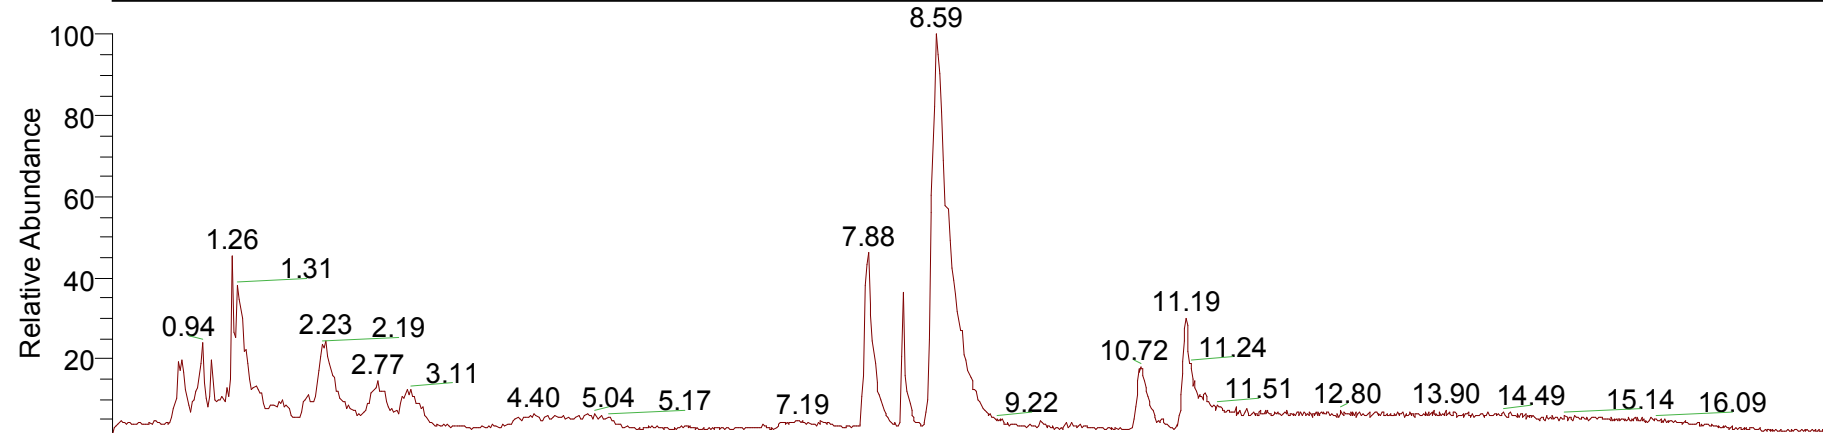

NL:  
4.21E9  
m/z=  
120.00-  
2000.00 F: Full  
ms MS  
Hilic\_N\_20220  
118\_2per\_S1

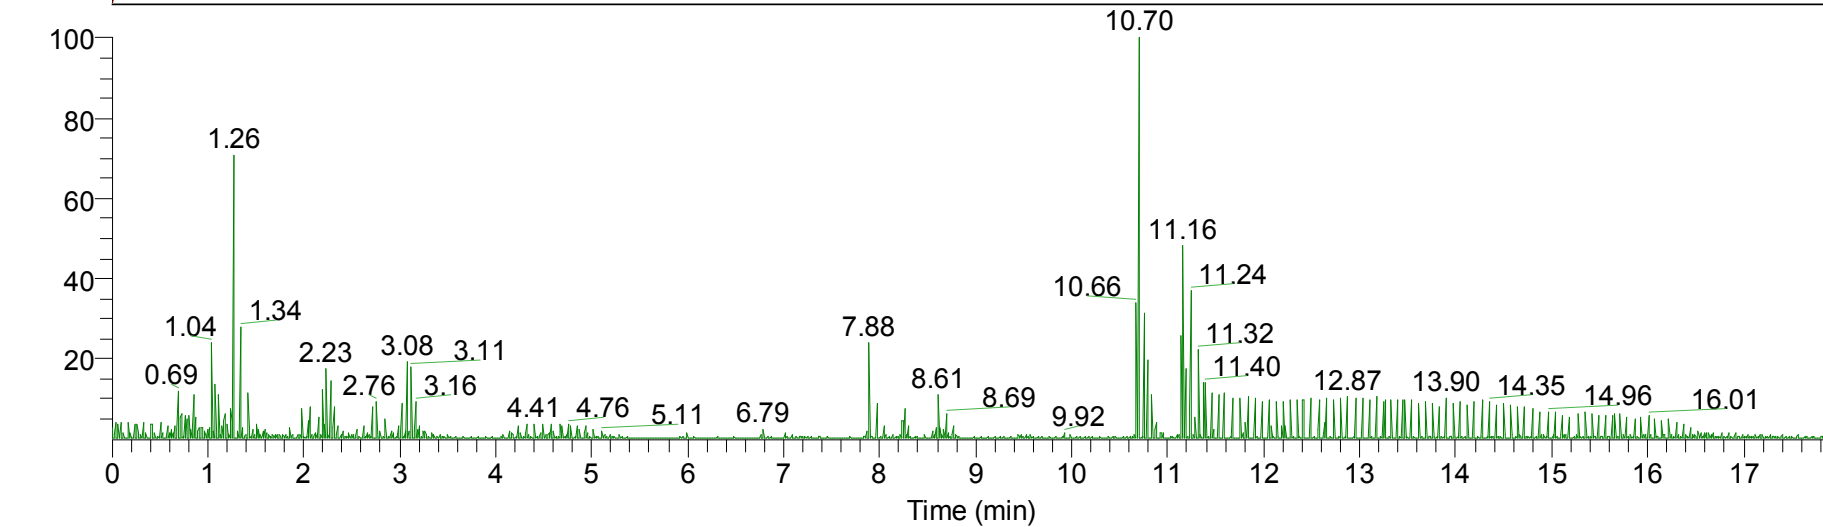

NL:  
9.61E8  
TIC F: Full ms2  
MS  
Hilic\_N\_20220  
118\_2per\_S1

RT: 0.00 - 17.90

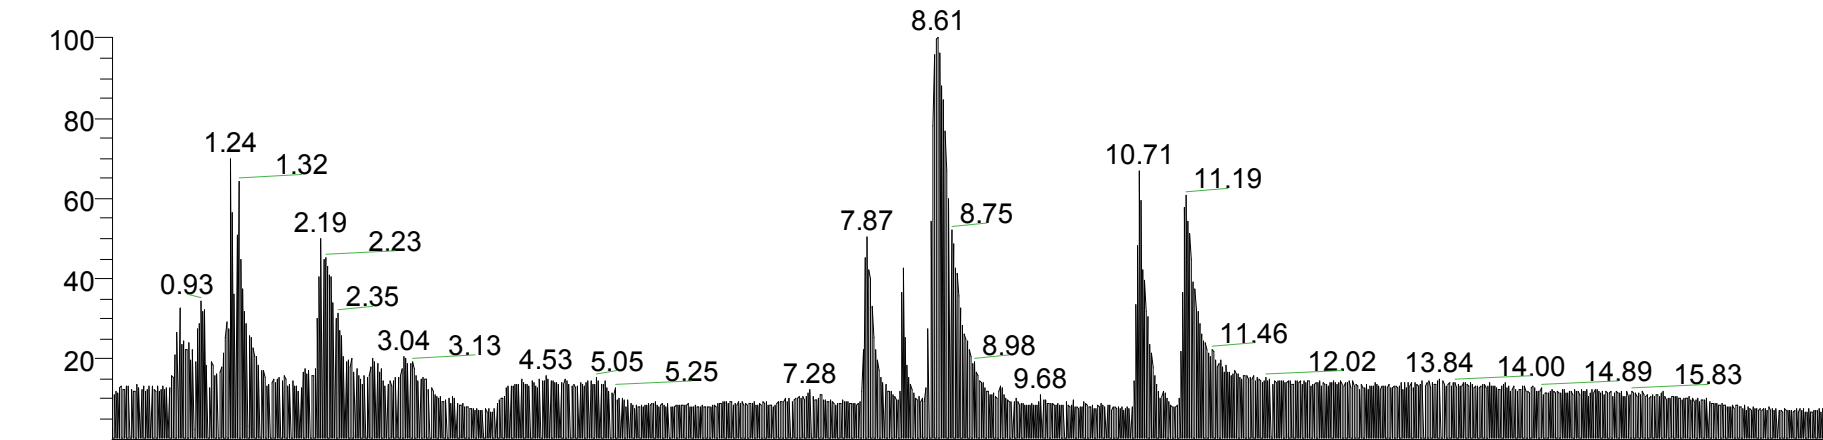

NL:  
3.55E9  
TIC MS  
Hilic\_N\_20220  
118\_2per\_S2

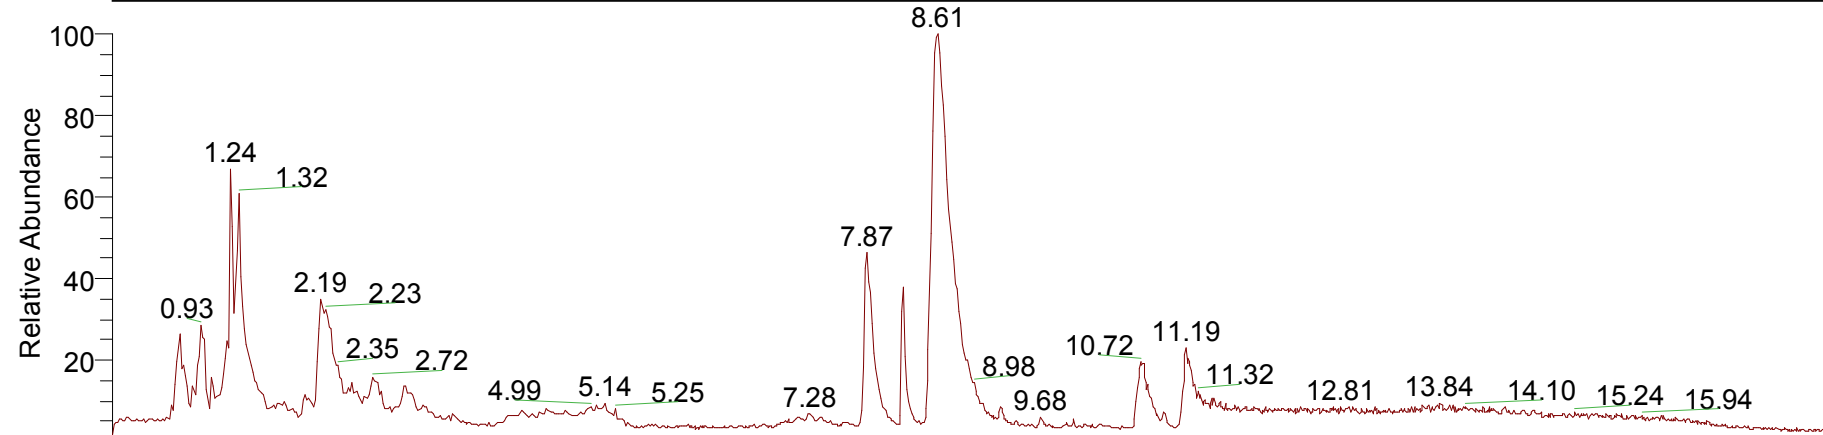

NL:  
3.34E9  
m/z=  
120.00-  
2000.00 F: Full  
ms MS  
Hilic\_N\_20220  
118\_2per\_S2

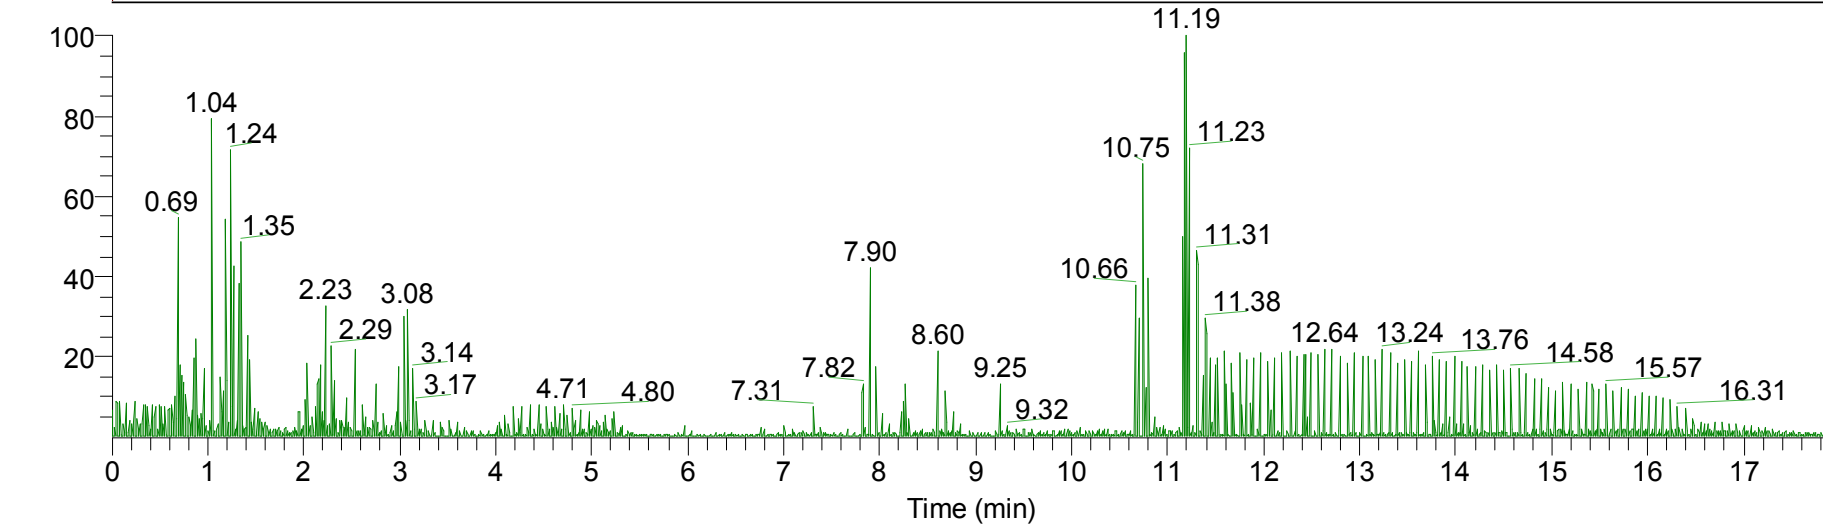

NL:  
4.37E8  
TIC F: Full ms2  
MS  
Hilic\_N\_20220  
118\_2per\_S2

RT: 0.00 - 17.90

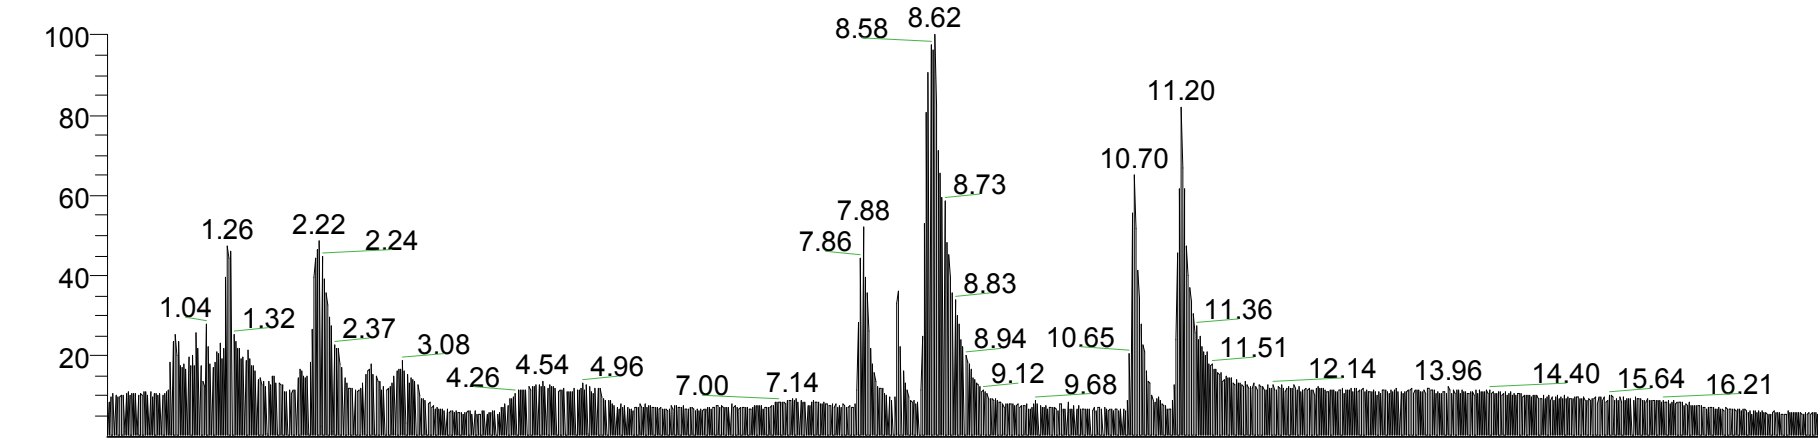

NL:  
4.36E9  
TIC MS  
Hilic\_N\_20220  
118\_2per\_S3

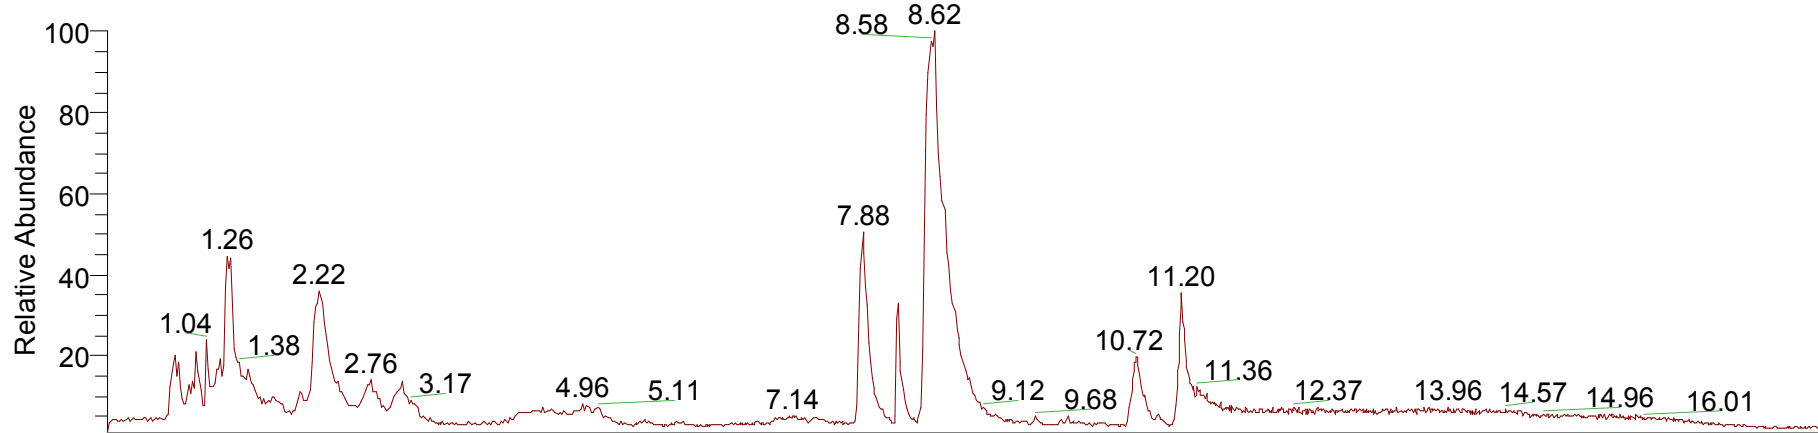

NL:  
4.12E9  
m/z=  
120.00-  
2000.00 F: Full  
ms MS  
Hilic\_N\_20220  
118\_2per\_S3

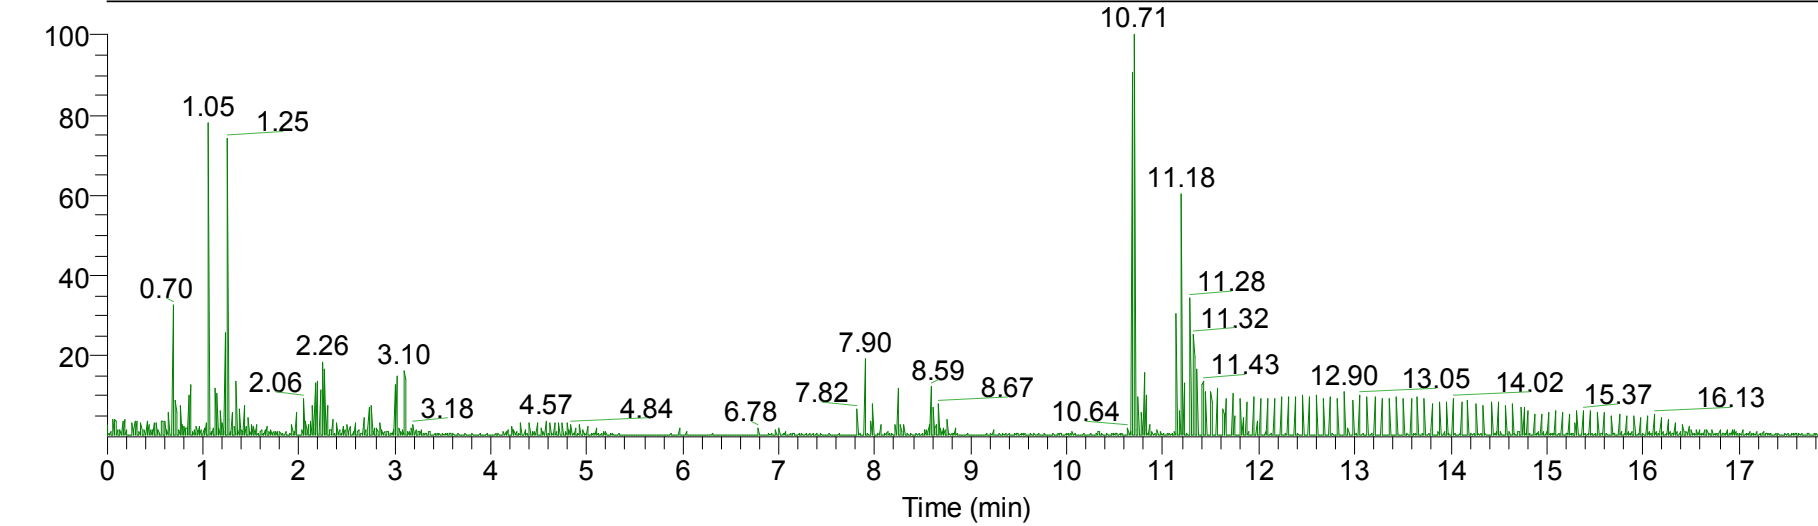

NL:  
9.63E8  
TIC F: Full ms2  
MS  
Hilic\_N\_20220  
118\_2per\_S3

RT: 0.00 - 17.90

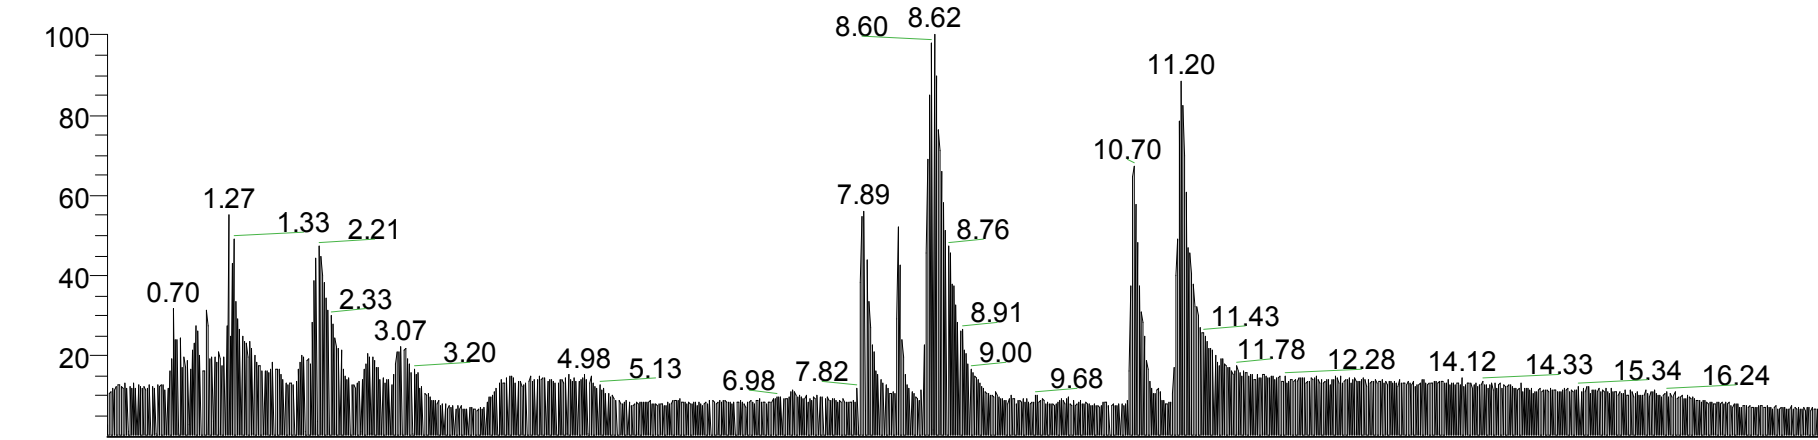

NL:  
3.61E9  
TIC MS  
Hilic\_N\_20220  
118\_2per\_S4

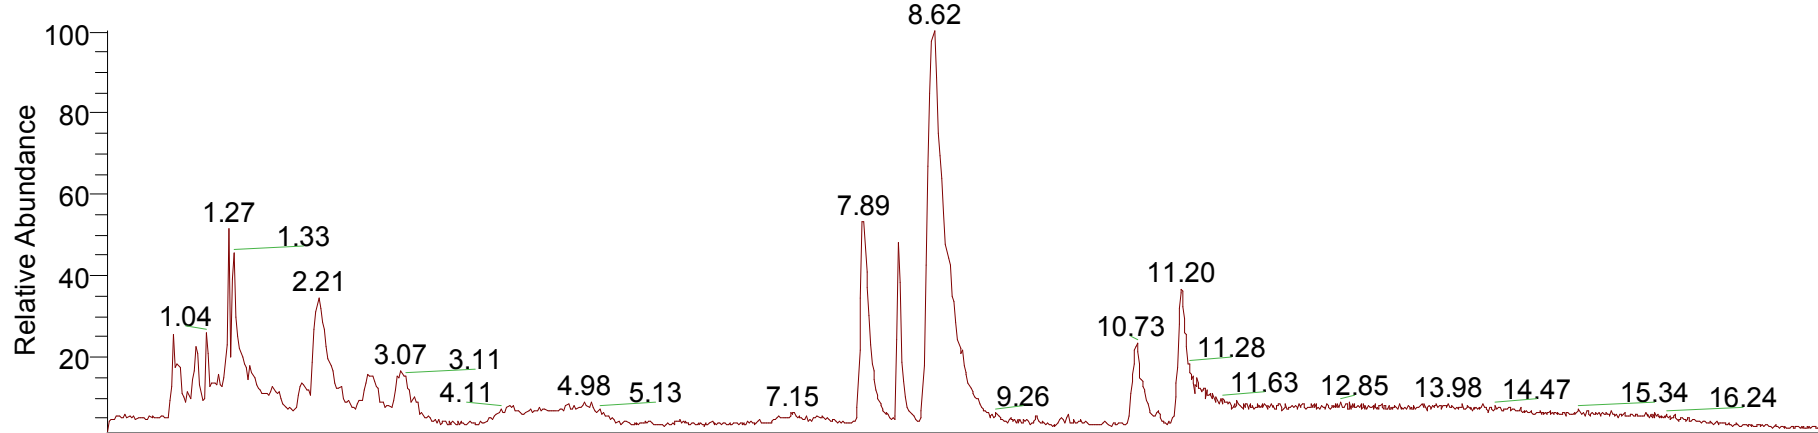

NL:  
3.39E9  
m/z=  
120.00-  
2000.00 F: Full  
ms MS  
Hilic\_N\_20220  
118\_2per\_S4

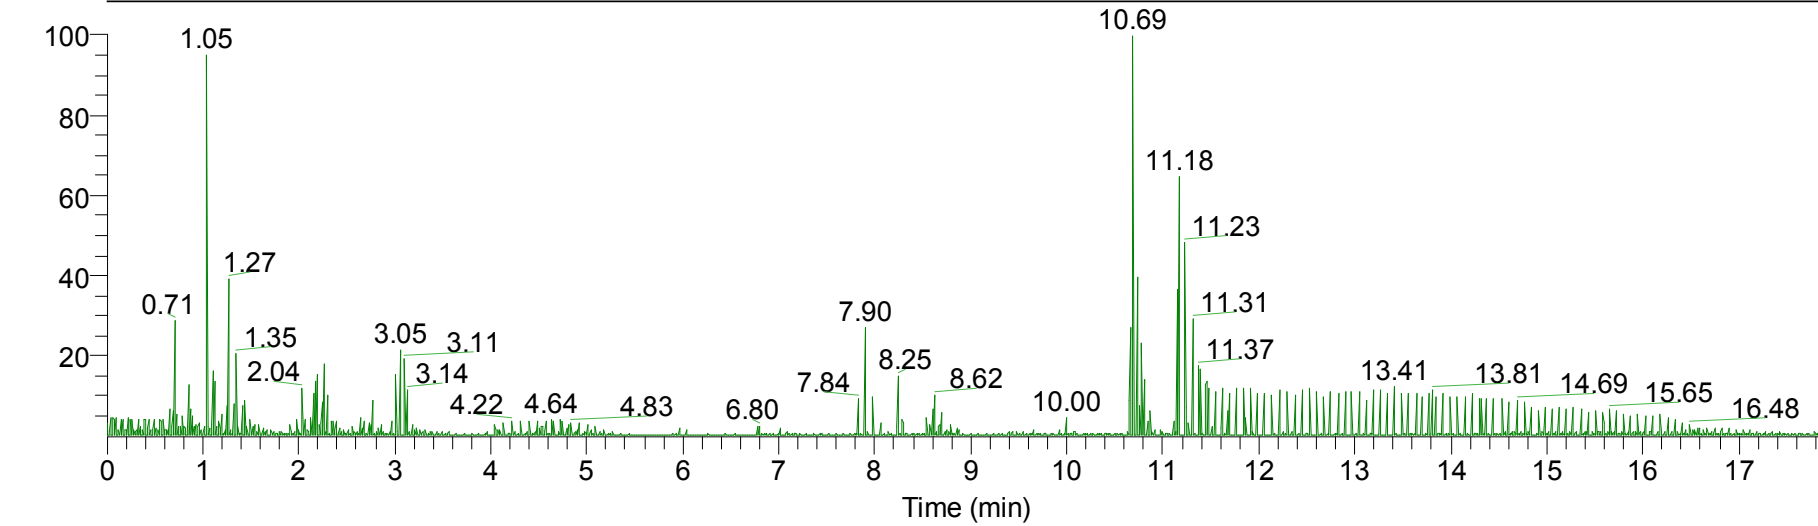

NL:  
8.45E8  
TIC F: Full ms2  
MS  
Hilic\_N\_20220  
118\_2per\_S4



RT: 0.00 - 17.90

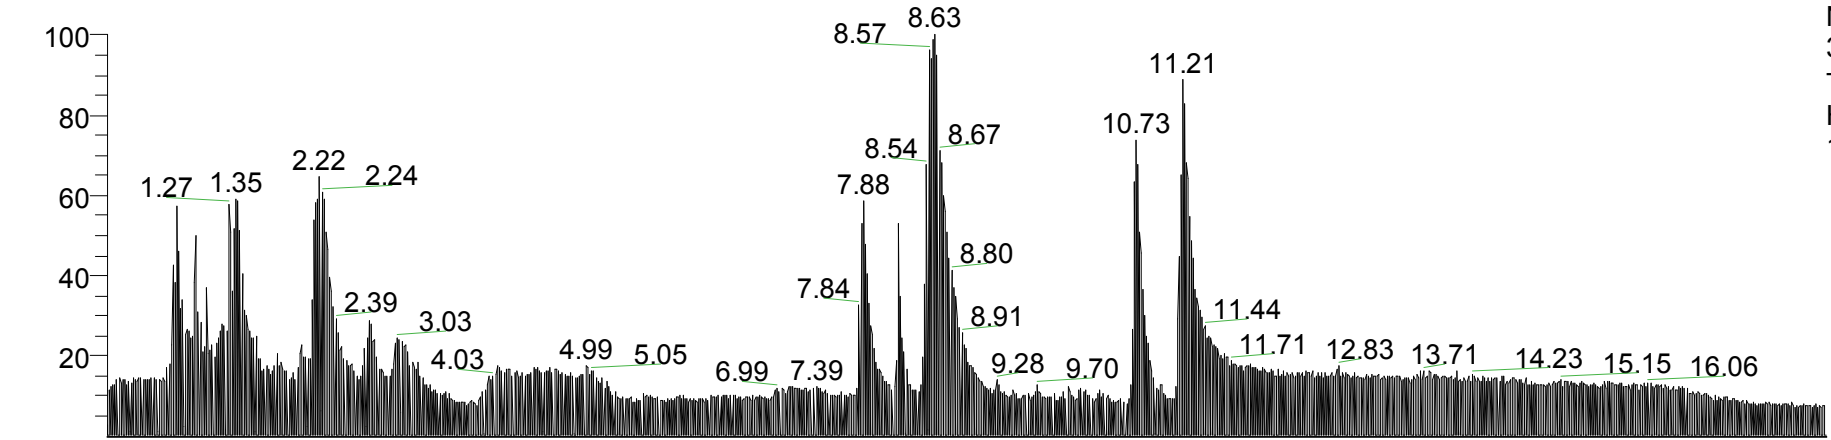

NL:  
3.33E9  
TIC MS  
Hilic\_N\_202201  
18\_2per\_QC1

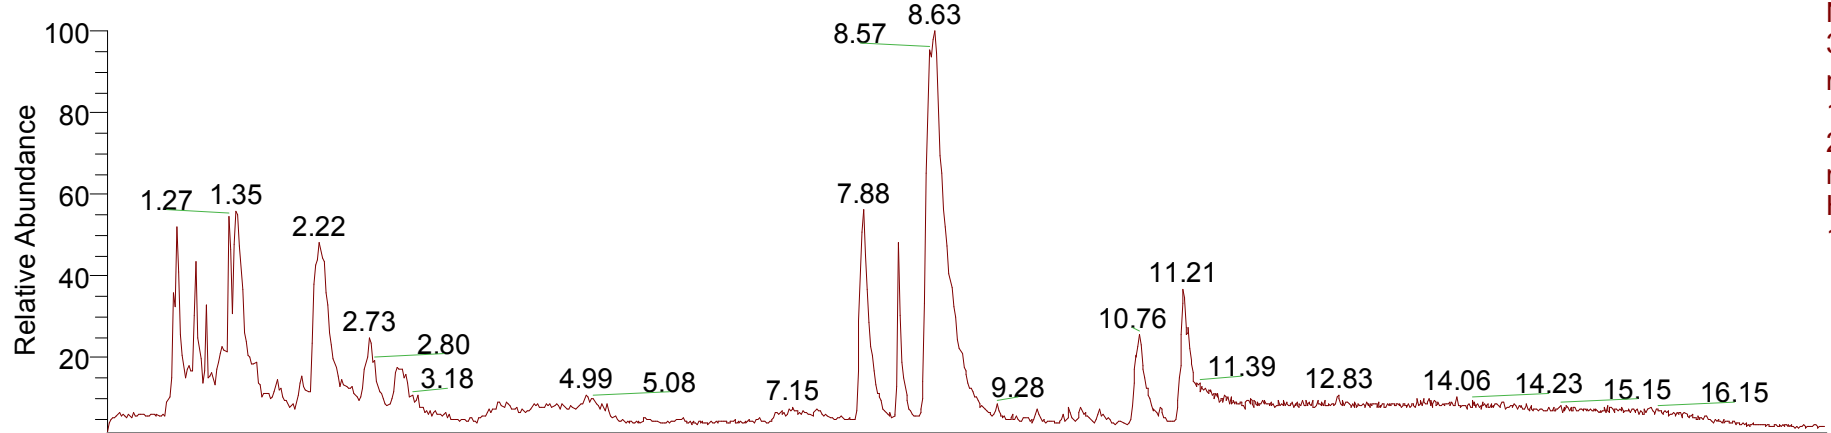

NL:  
3.11E9  
m/z=  
120.00-  
2000.00 F: Full  
ms MS  
Hilic\_N\_202201  
18\_2per\_QC1

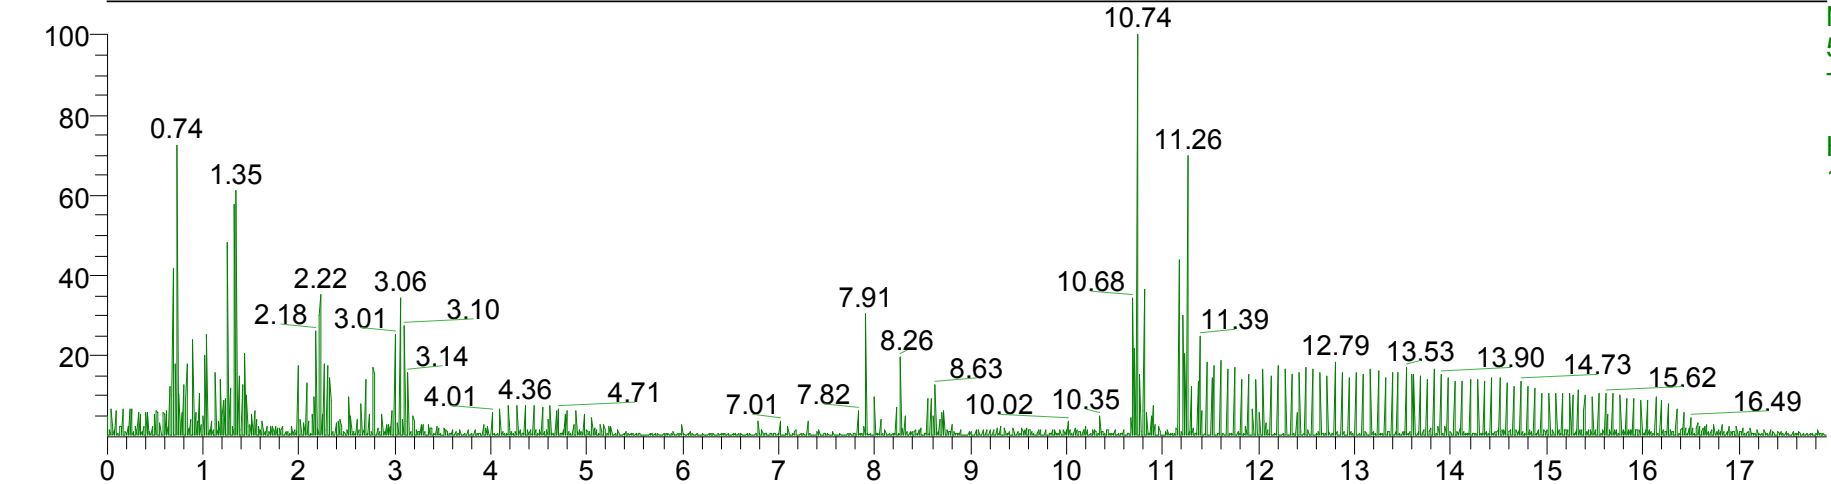

NL:  
5.76E8  
TIC F: Full ms2  
MS  
Hilic\_N\_202201  
18\_2per\_QC1

RT: 0.00 - 17.90

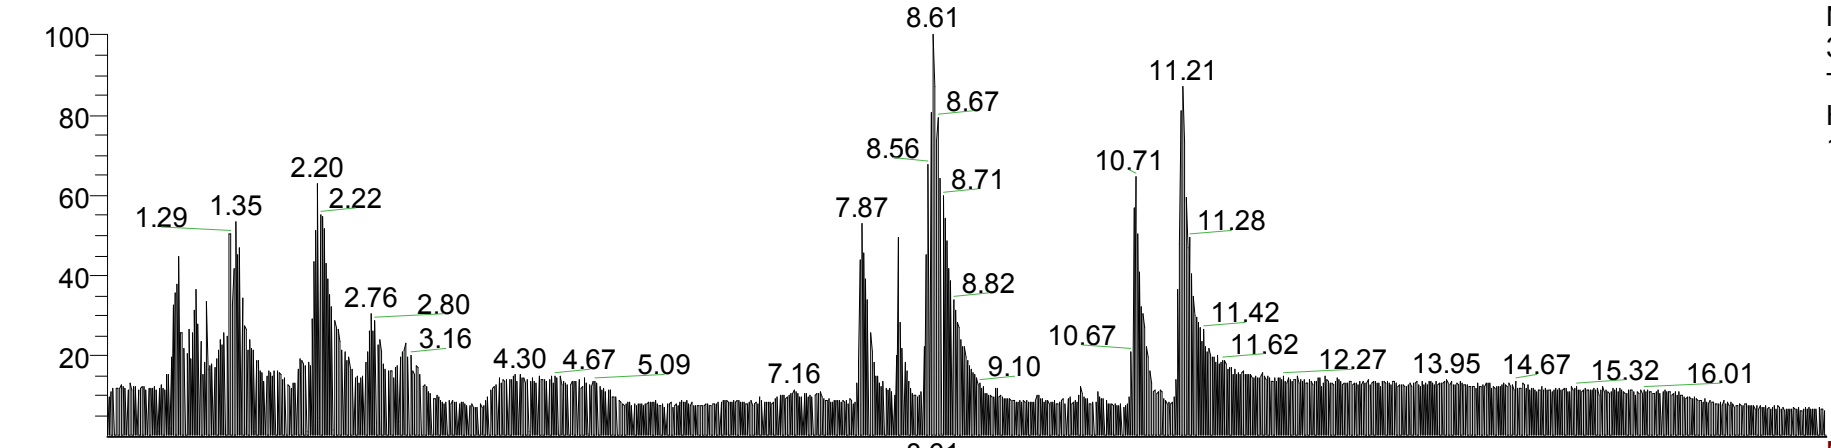

NL:  
3.78E9  
TIC MS  
Hilic\_N\_202201  
18\_2per\_QC2

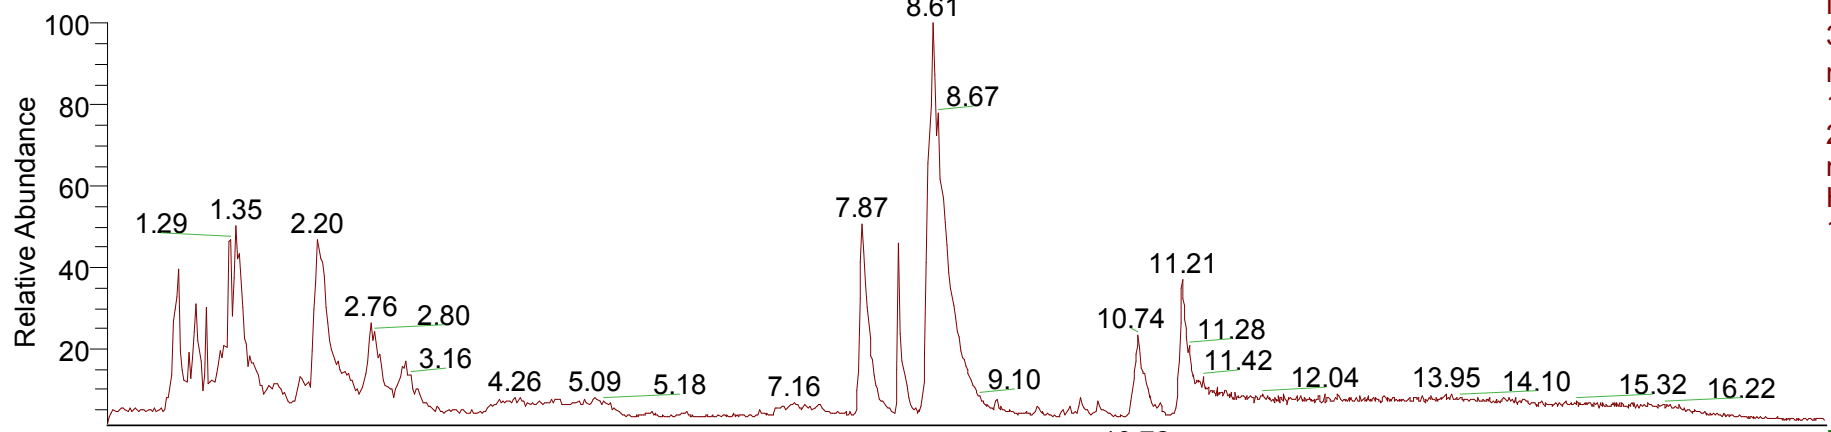

NL:  
3.54E9  
m/z=  
120.00-  
2000.00 F: Full  
ms MS  
Hilic\_N\_202201  
18\_2per\_QC2

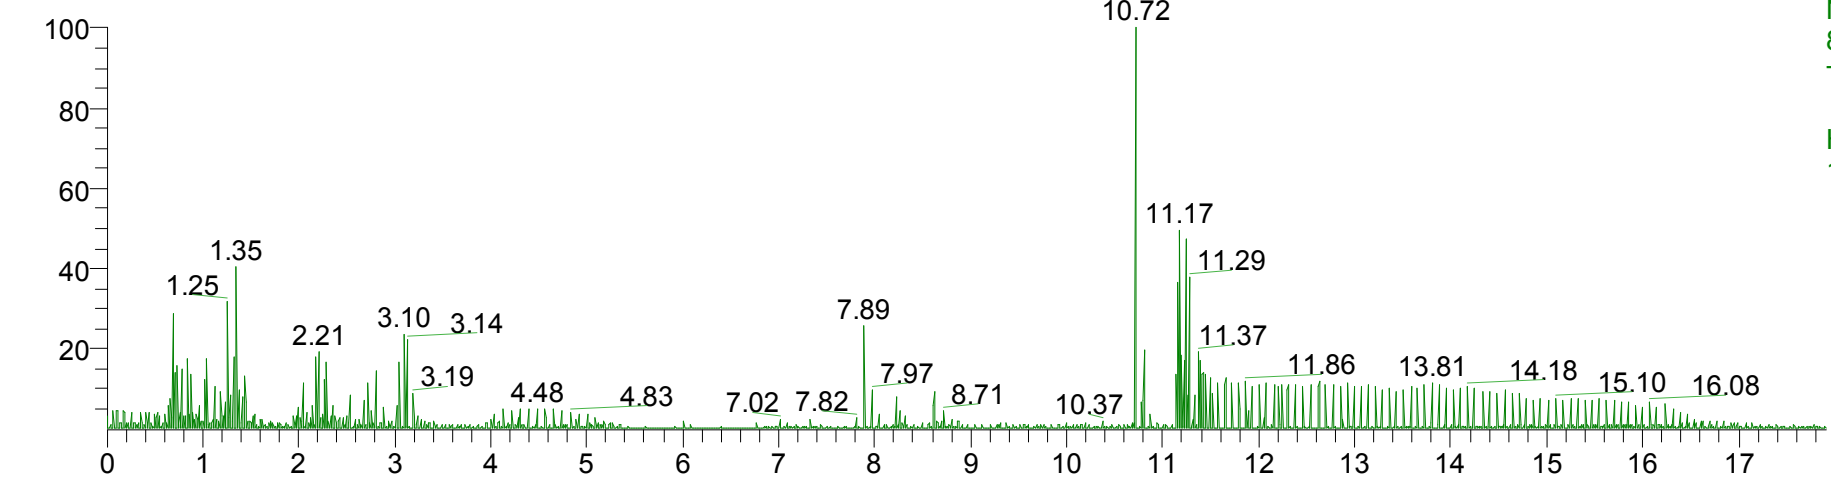

NL:  
8.68E8  
TIC F: Full ms2  
MS  
Hilic\_N\_202201  
18\_2per\_QC2

Time (min)

RT: 0.00 - 17.90

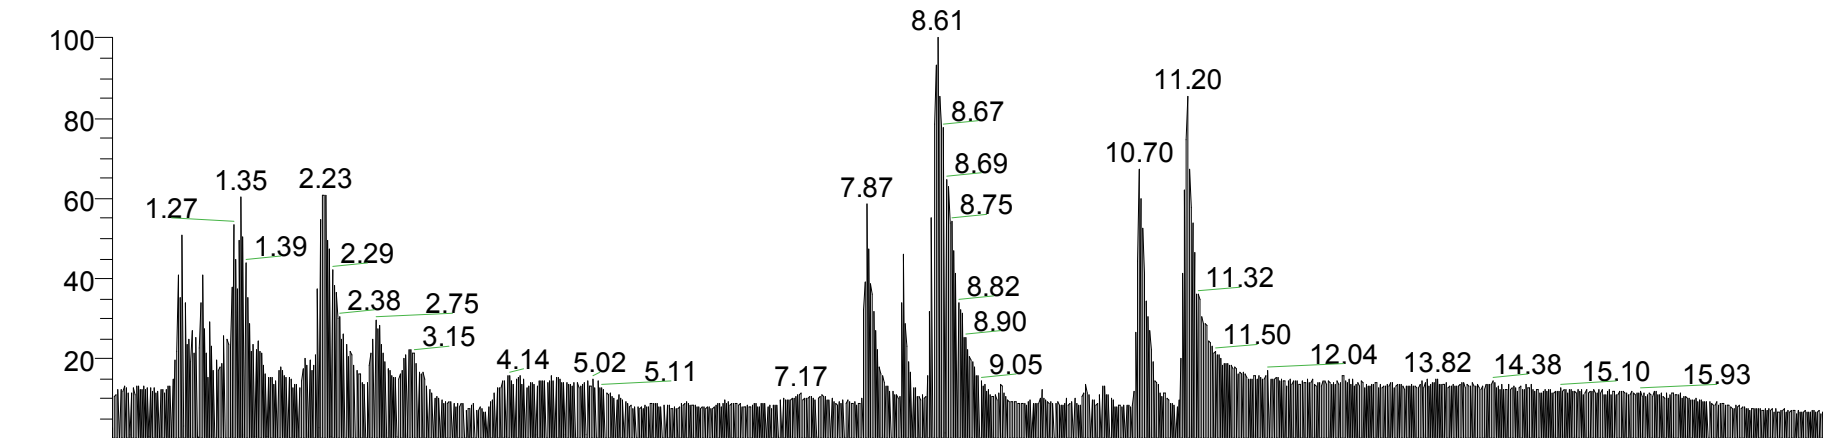

NL:  
3.72E9  
TIC MS  
Hilic\_N\_202201  
18\_2per\_QC3

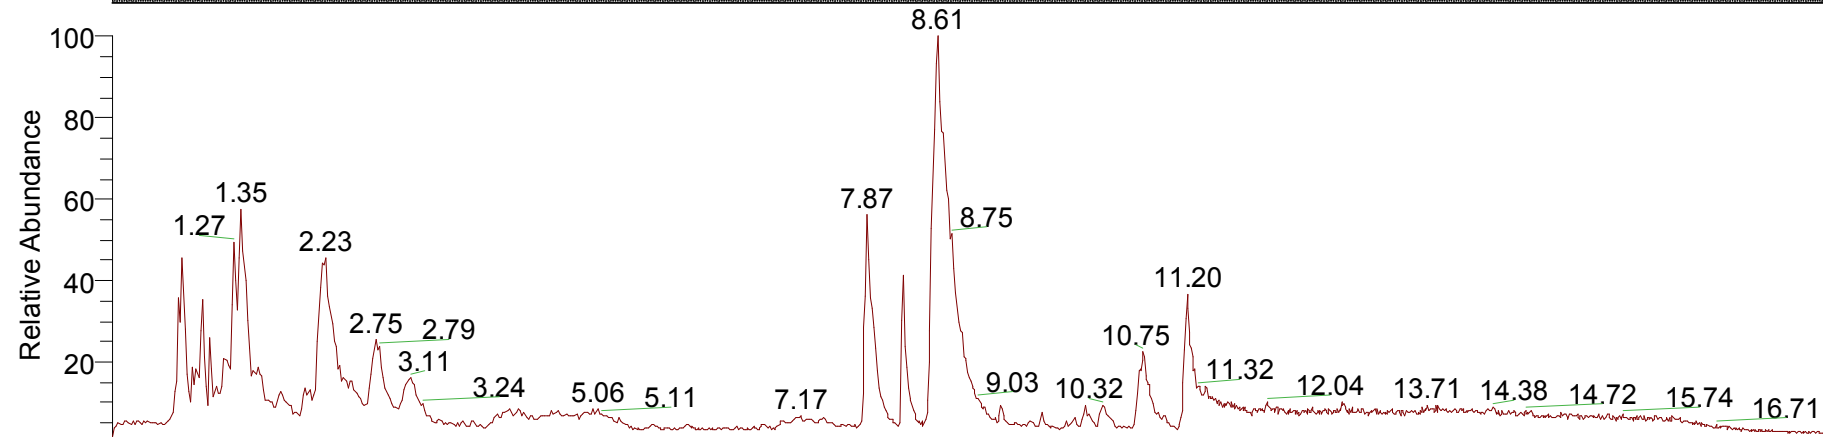

NL:  
3.49E9  
m/z=  
120.00-  
2000.00 F: Full  
ms MS  
Hilic\_N\_202201  
18\_2per\_QC3

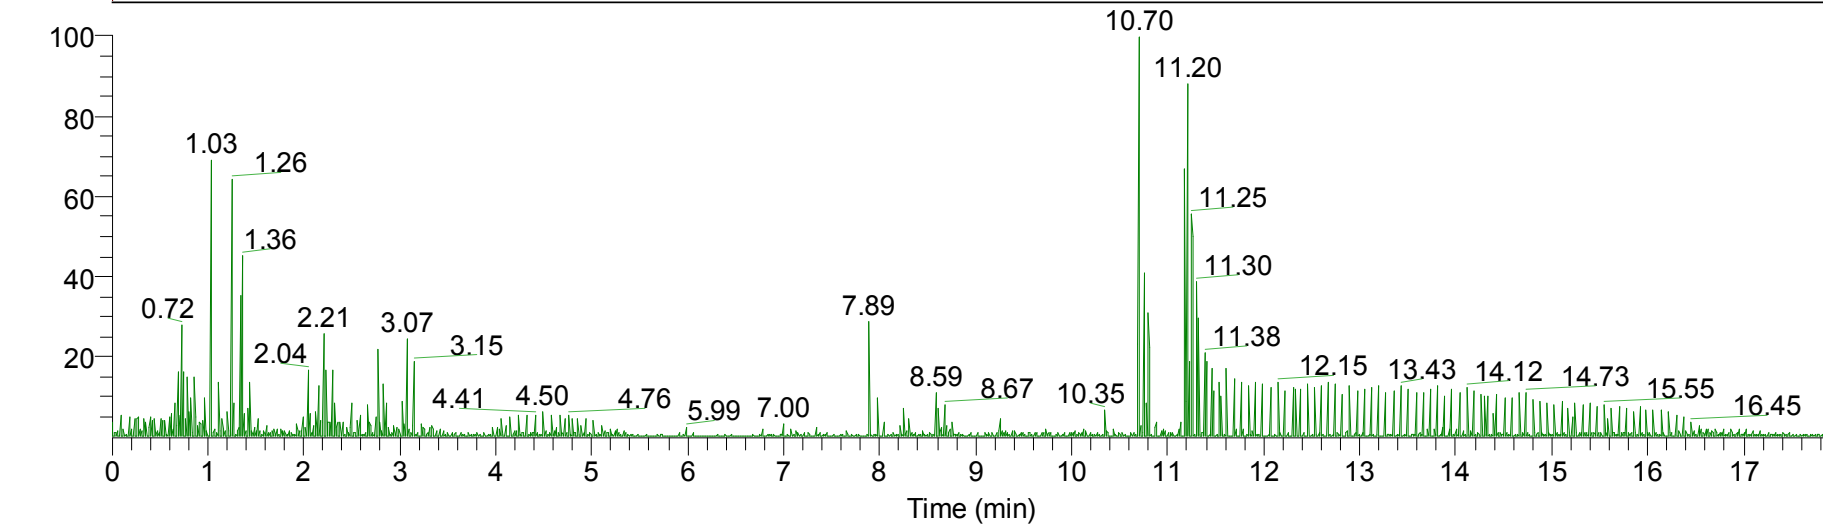

NL:  
7.64E8  
TIC F: Full ms2  
MS  
Hilic\_N\_202201  
18\_2per\_QC3

RT: 0.00 - 17.90

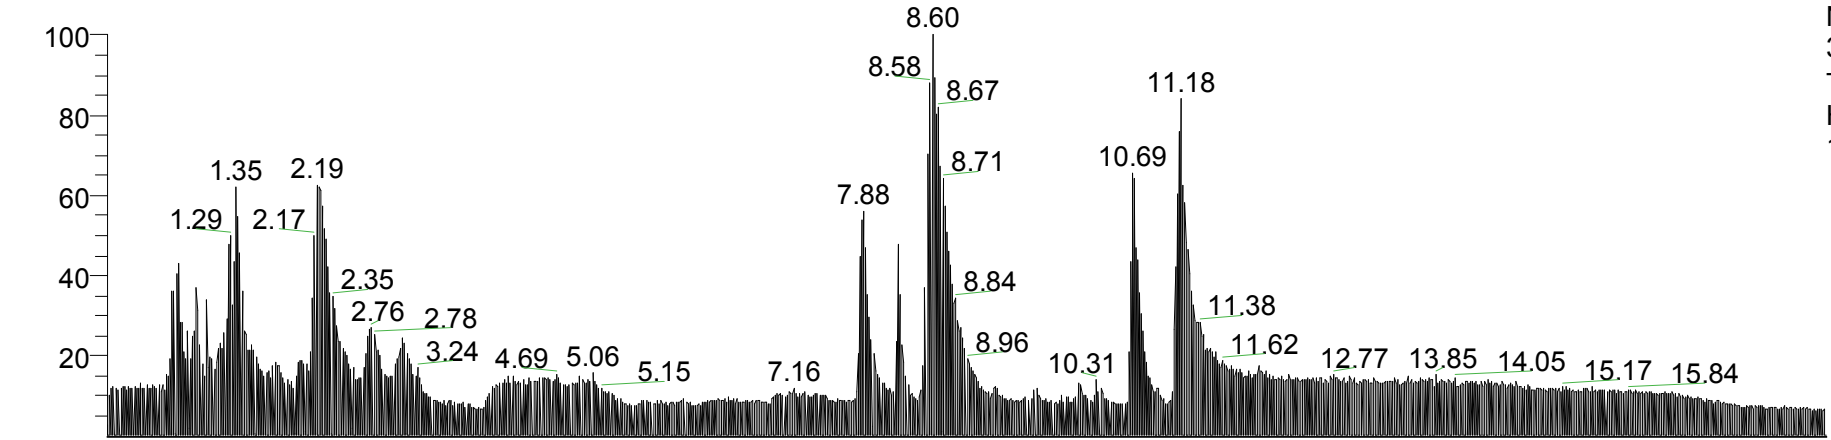

NL:  
3.63E9  
TIC MS  
Hilic\_N\_202201  
18\_2per\_QC4

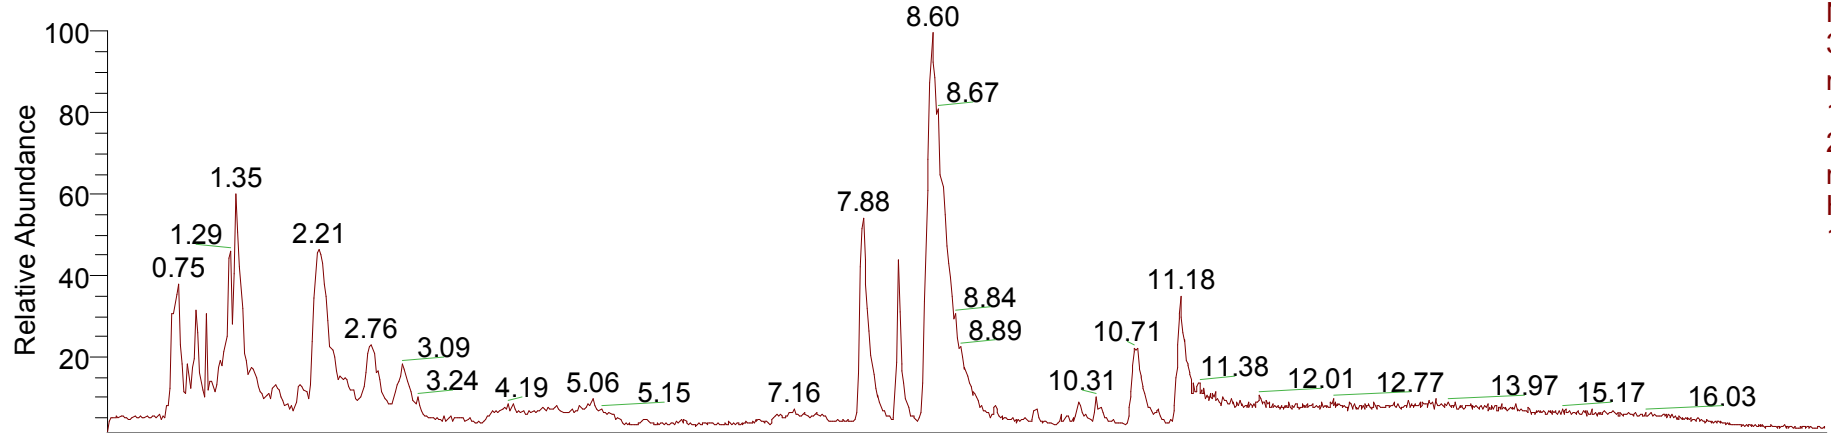

NL:  
3.40E9  
m/z=  
120.00-  
2000.00 F: Full  
ms MS  
Hilic\_N\_202201  
18\_2per\_QC4

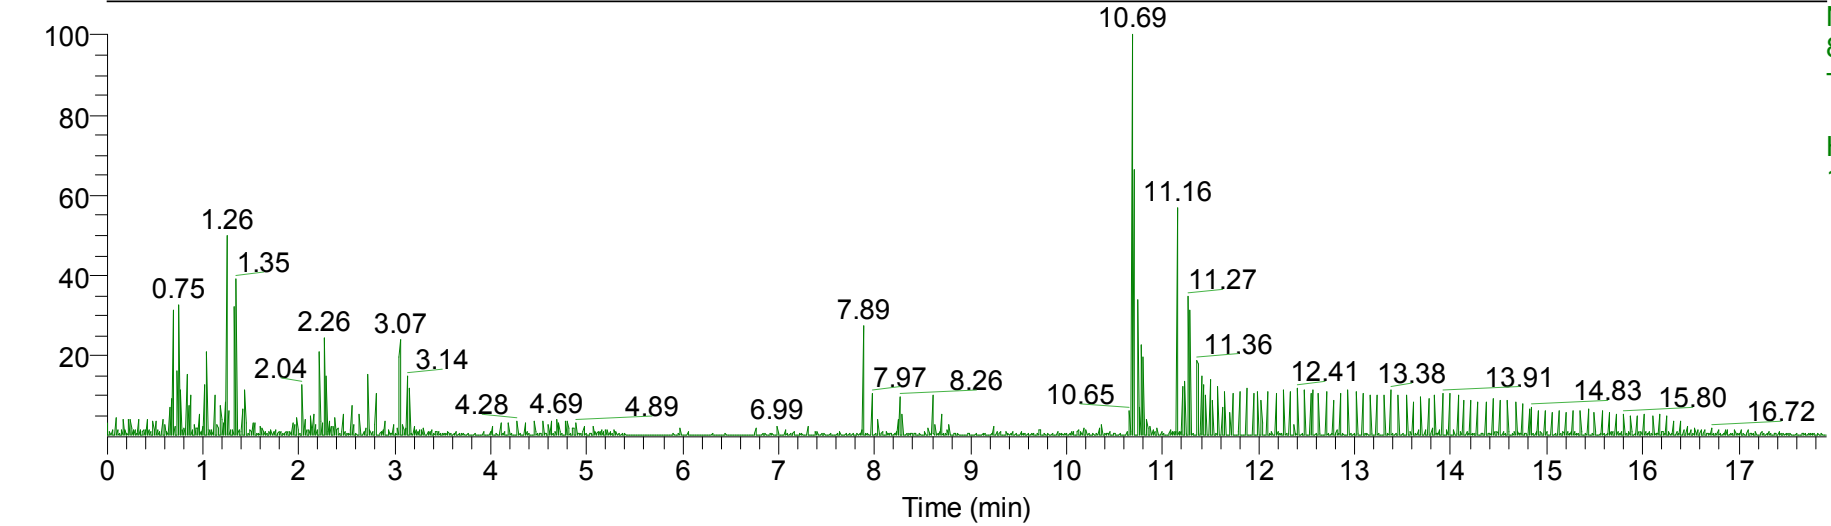

NL:  
8.74E8  
TIC F: Full ms2  
MS  
Hilic\_N\_202201  
18\_2per\_QC4

RT: 0.00 - 17.90

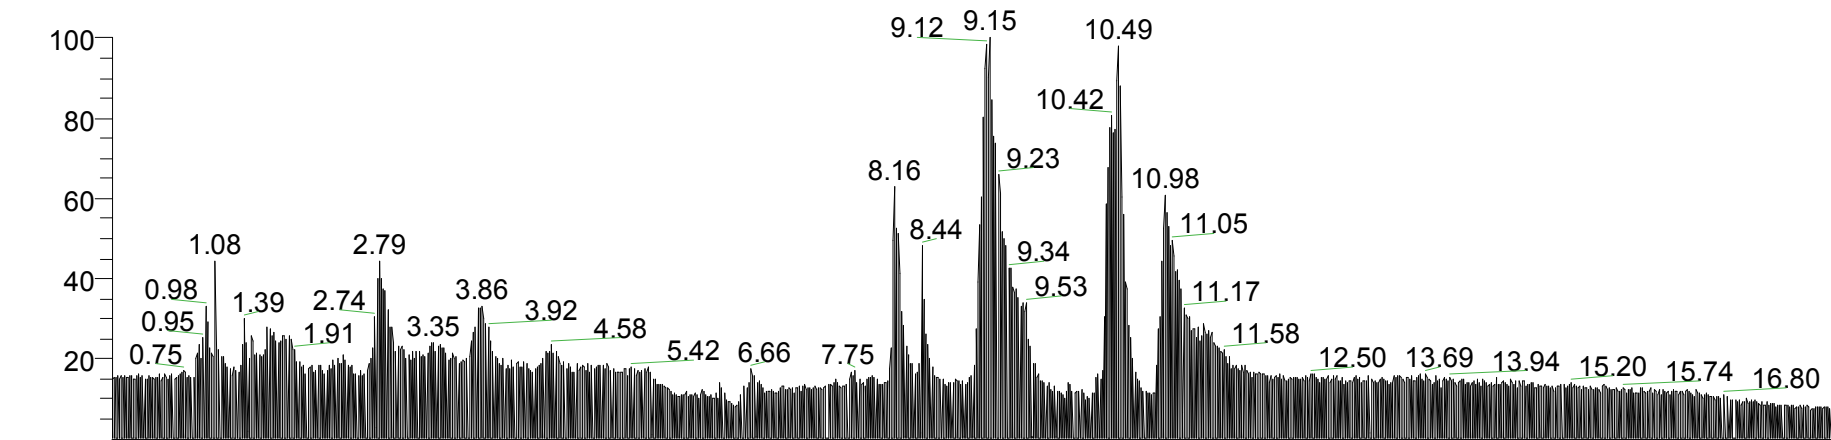

NL:  
3.69E9  
TIC MS  
Hilic\_N\_202201  
18\_2per\_QC5

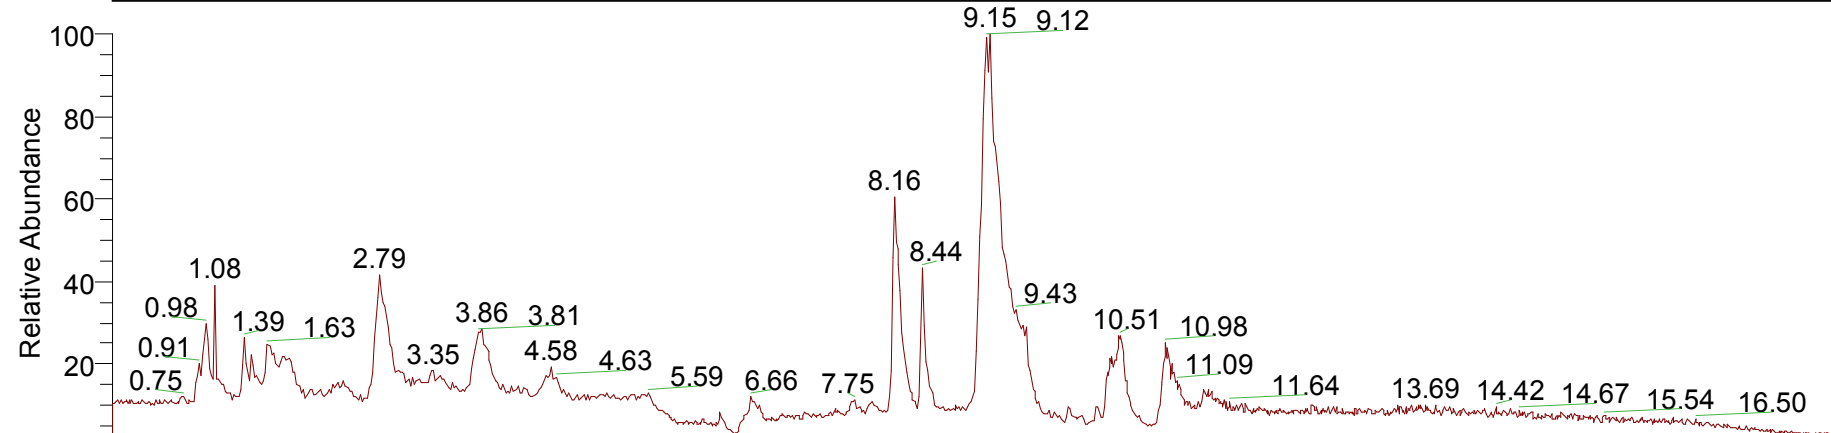

NL:  
3.43E9  
m/z=  
120.00-  
2000.00 F: Full  
ms MS  
Hilic\_N\_202201  
18\_2per\_QC5

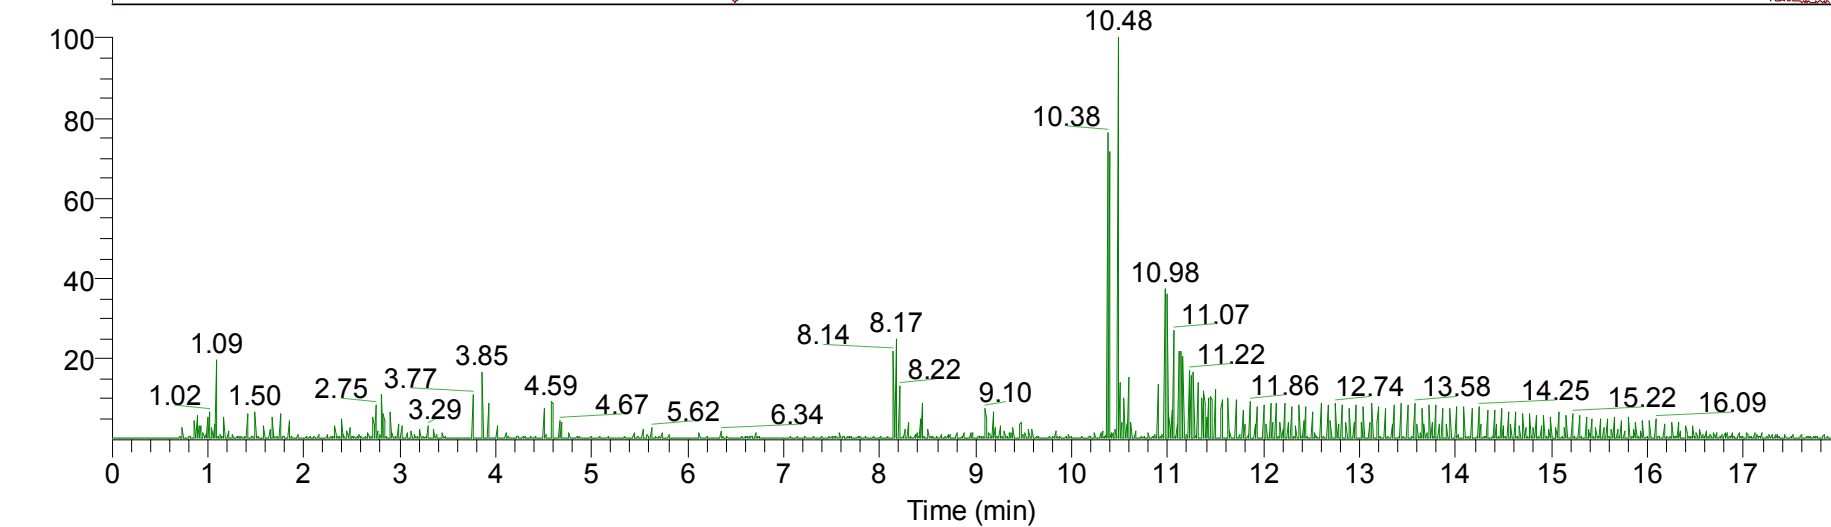

NL:  
1.21E9  
TIC F: Full ms2  
MS  
Hilic\_N\_202201  
18\_2per\_QC5

RT: 0.00 - 17.90

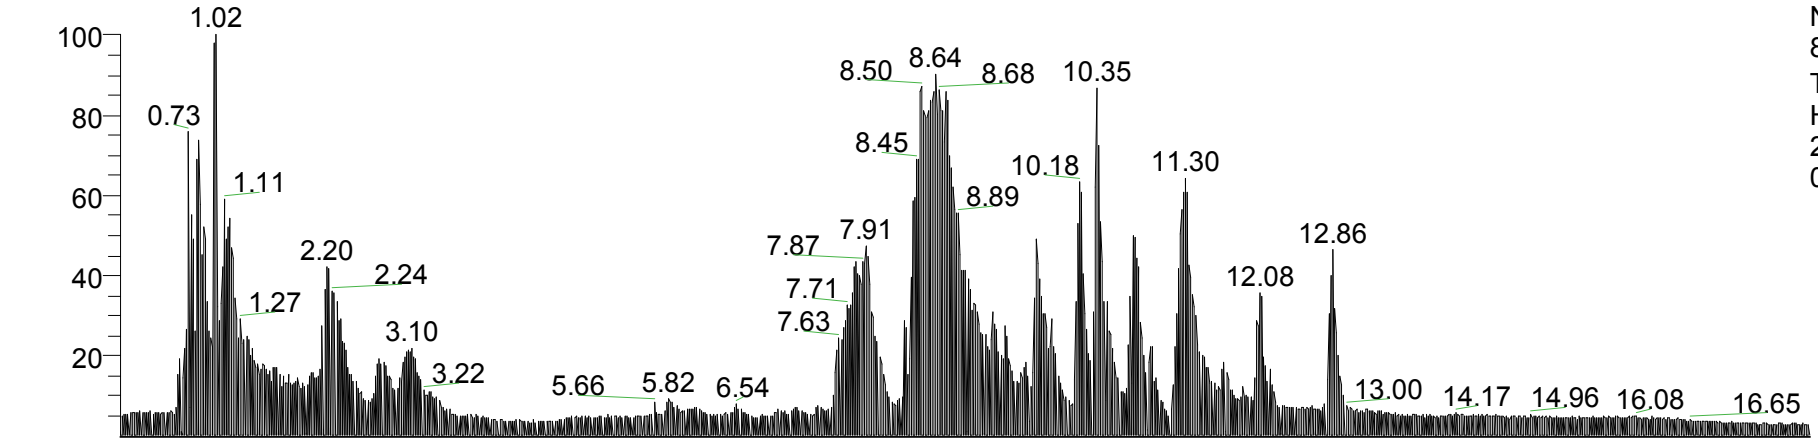

NL:  
8.70E9  
TIC MS  
Hilic\_N\_Junti\_202  
20118\_2per\_1\_5  
0\_1

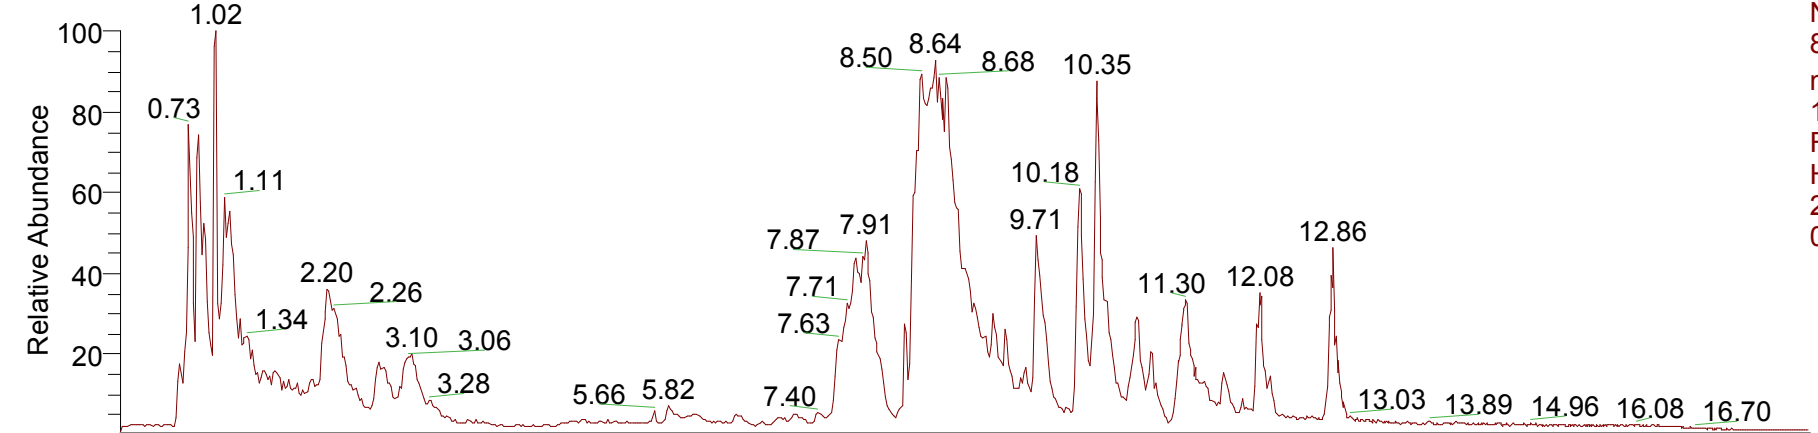

NL:  
8.11E9  
m/z=  
120.00-2000.00  
F: Full ms MS  
Hilic\_N\_Junti\_202  
20118\_2per\_1\_5  
0\_1

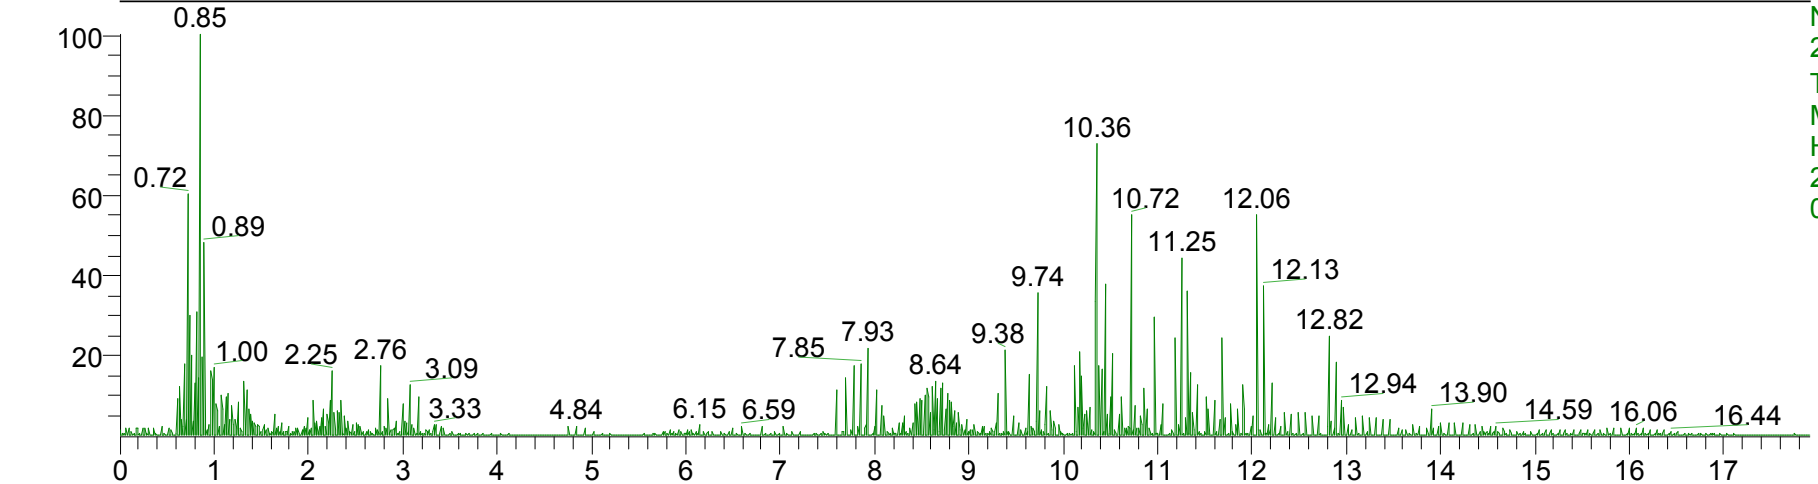

NL:  
2.04E9  
TIC F: Full ms2  
MS  
Hilic\_N\_Junti\_202  
20118\_2per\_1\_5  
0\_1

Time (min)

RT: 0.00 - 17.90

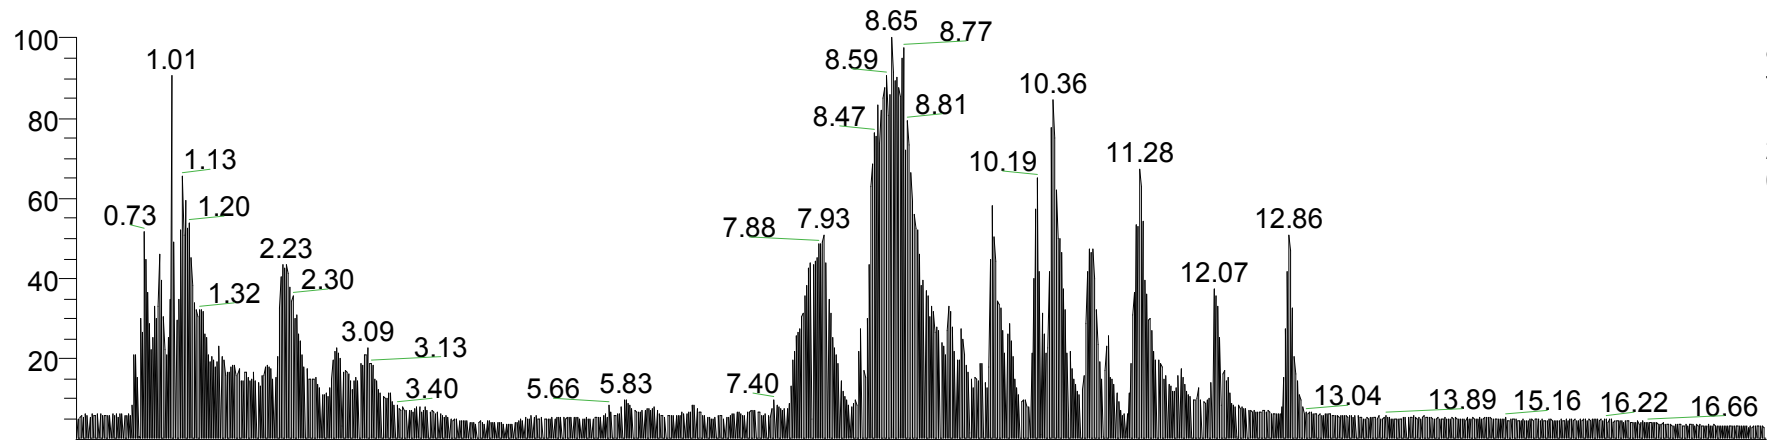

NL:  
8.23E9  
TIC MS  
Hilic\_N\_Junti\_202  
20118\_2per\_1\_5  
0\_2

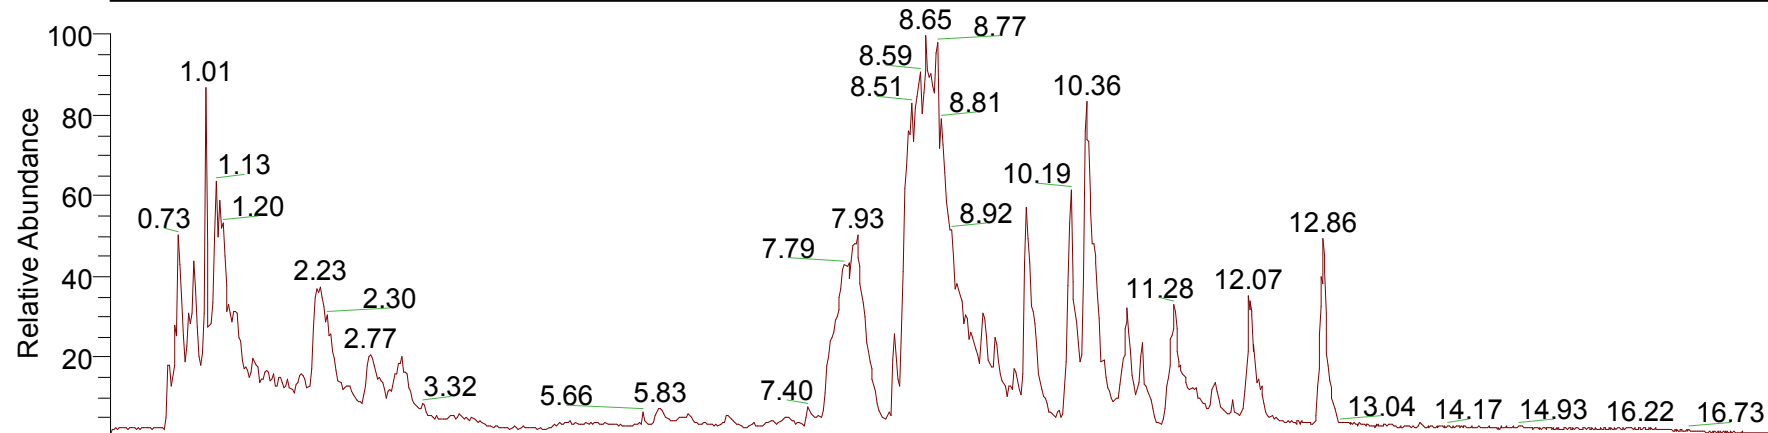

NL:  
7.90E9  
m/z=  
120.00-2000.00  
F: Full ms MS  
Hilic\_N\_Junti\_202  
20118\_2per\_1\_5  
0\_2

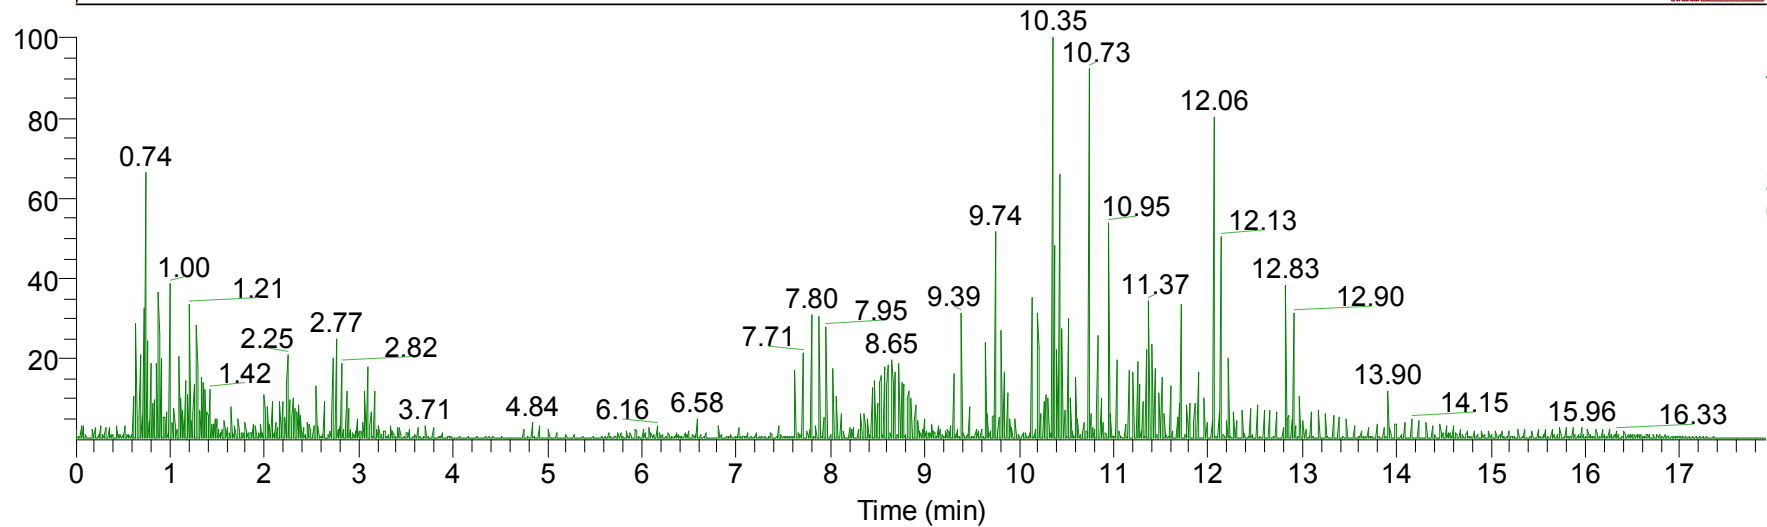

NL:  
1.35E9  
TIC F: Full ms2  
MS  
Hilic\_N\_Junti\_202  
20118\_2per\_1\_5  
0\_2

RT: 0.00 - 17.90

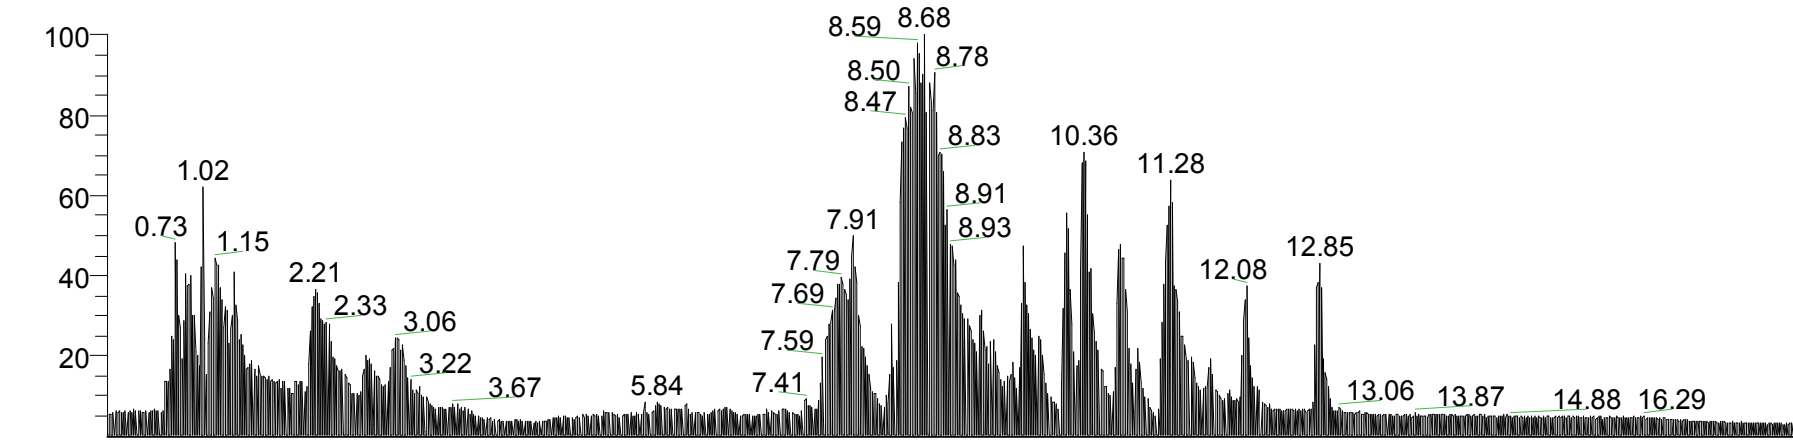

NL:  
8.17E9  
TIC MS  
Hilic\_N\_Junti\_202  
20118\_2per\_1\_5  
0\_3

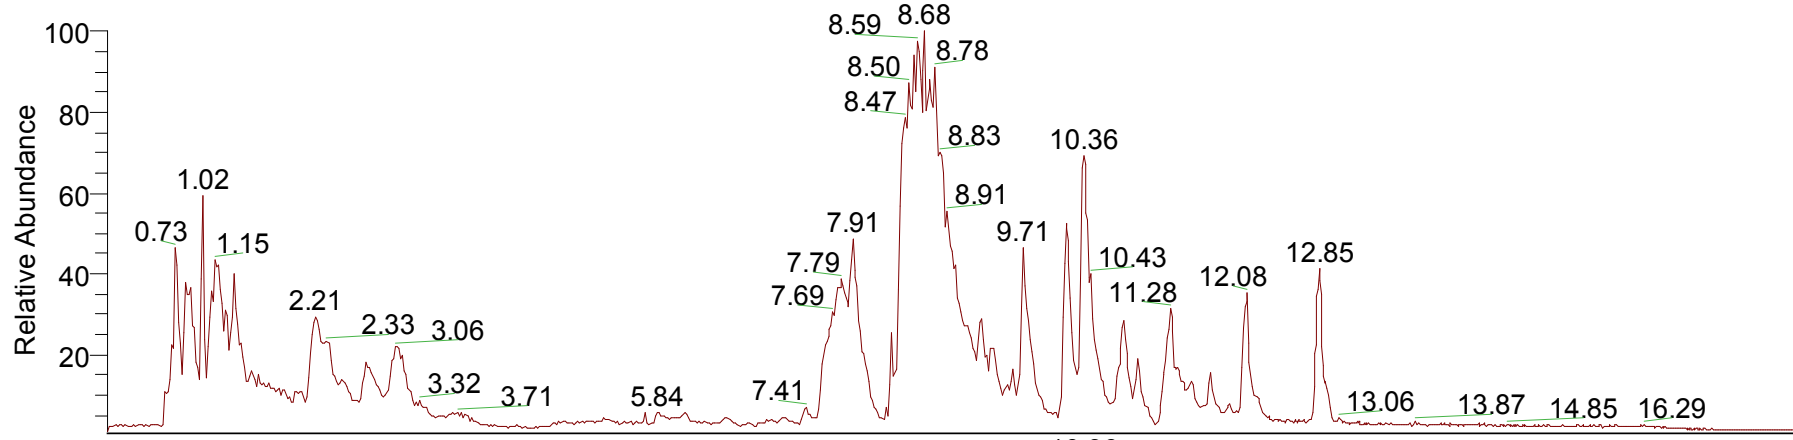

NL:  
7.86E9  
m/z=  
120.00-2000.00  
F: Full ms MS  
Hilic\_N\_Junti\_202  
20118\_2per\_1\_5  
0\_3

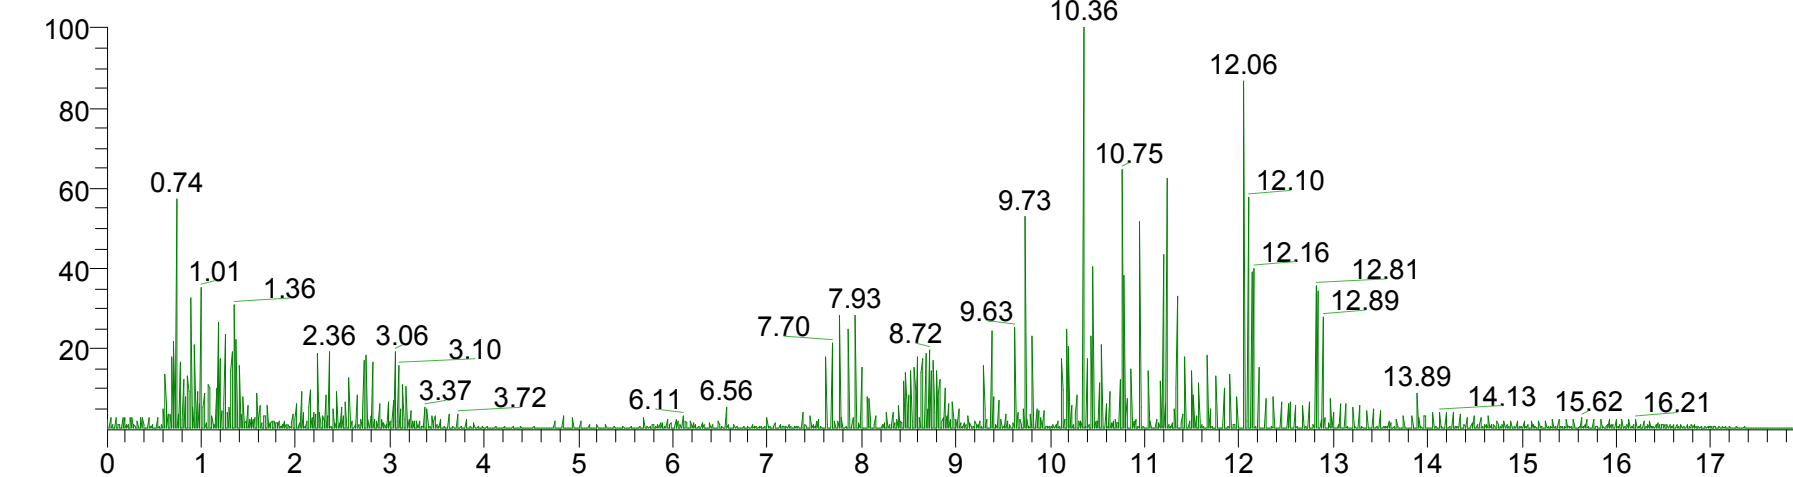

NL:  
1.35E9  
TIC F: Full ms2  
MS  
Hilic\_N\_Junti\_202  
20118\_2per\_1\_5  
0\_3

Time (min)



RT: 0.00 - 17.90

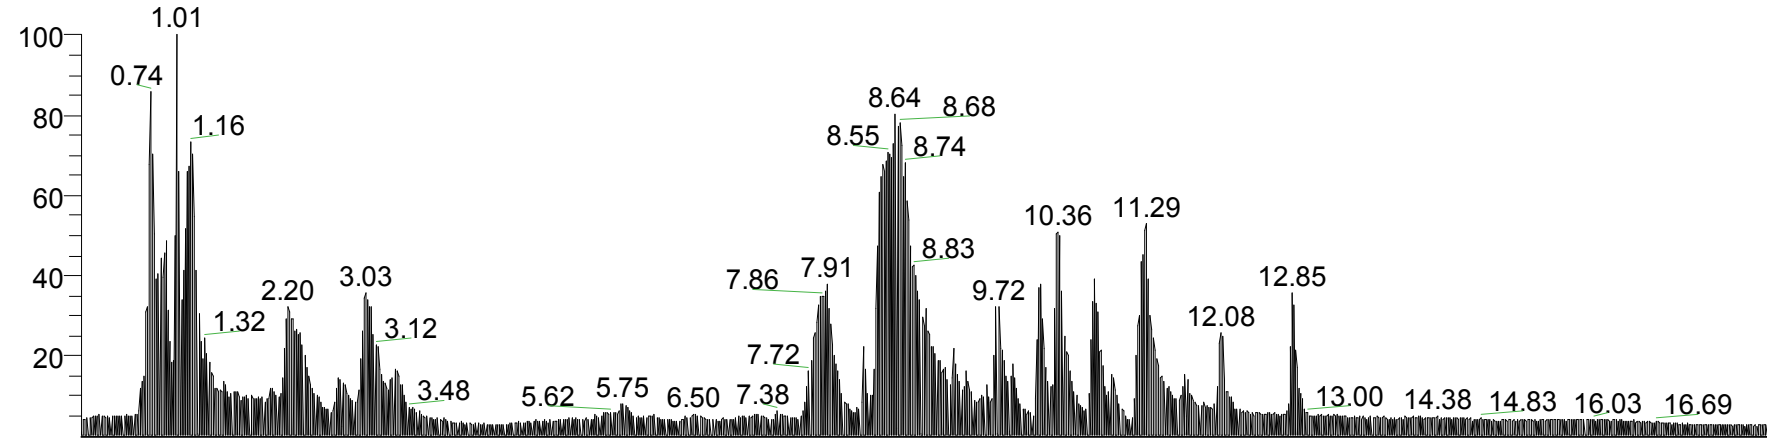

NL:  
9.86E9  
TIC MS  
Hilic\_N\_Junti\_202  
20118\_2per\_1\_5  
0\_4

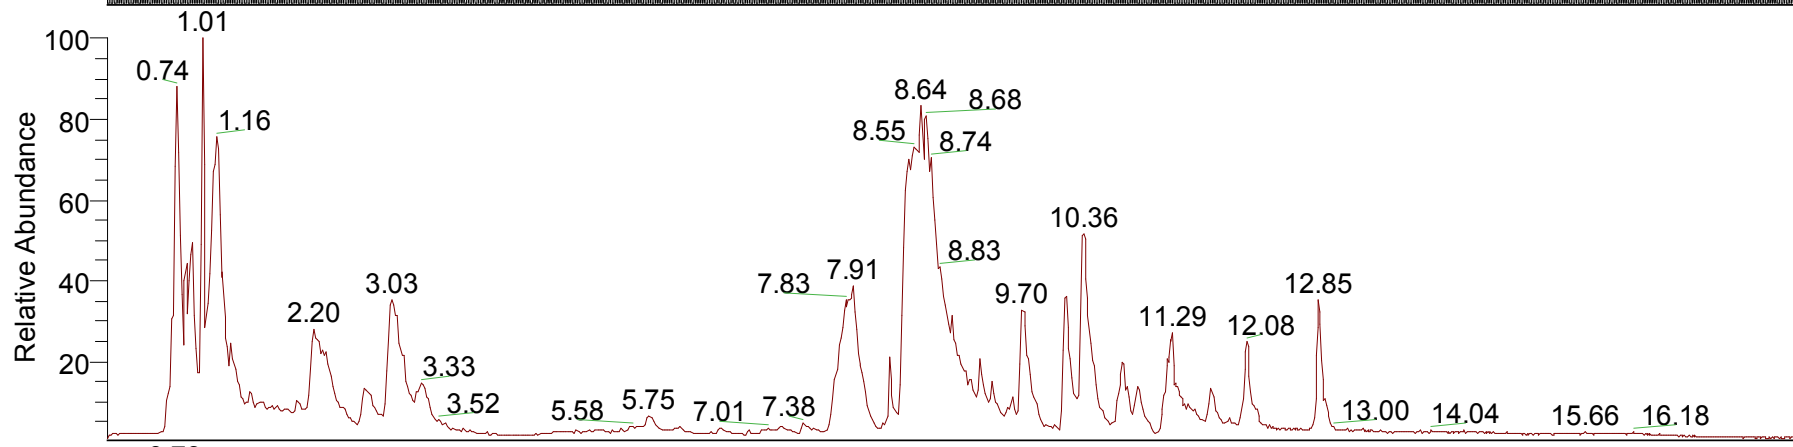

NL:  
9.15E9  
m/z=  
120.00-2000.00  
F: Full ms MS  
Hilic\_N\_Junti\_202  
20118\_2per\_1\_5  
0\_4

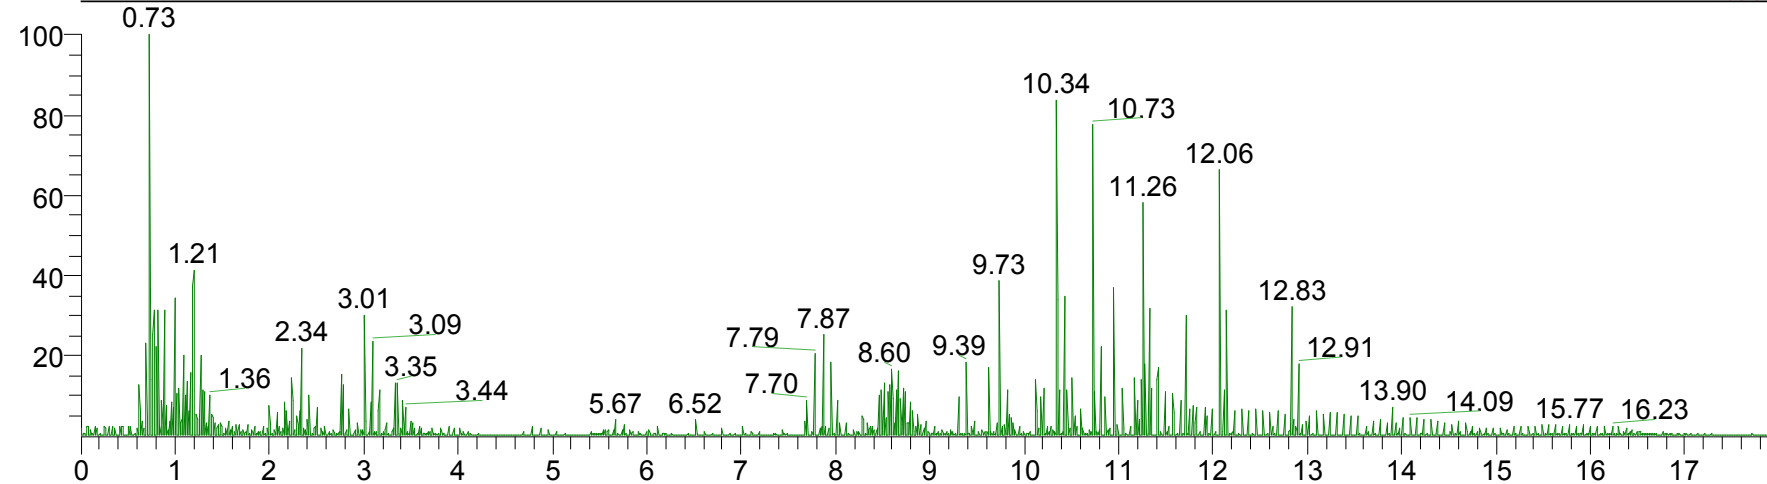

NL:  
1.59E9  
TIC F: Full ms2  
MS  
Hilic\_N\_Junti\_202  
20118\_2per\_1\_5  
0\_4

Time (min)

RT: 0.00 - 17.90

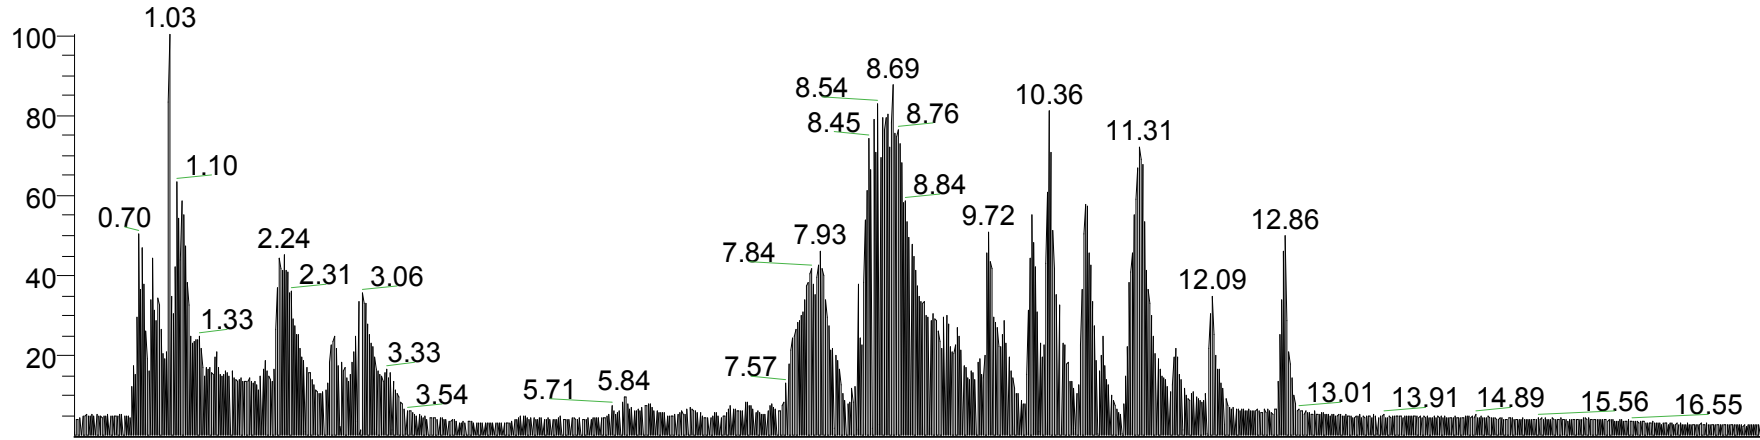

NL: 9.47E9  
TIC MS  
Hilic\_N\_Junti\_202  
20118\_2per\_1\_50  
0\_1

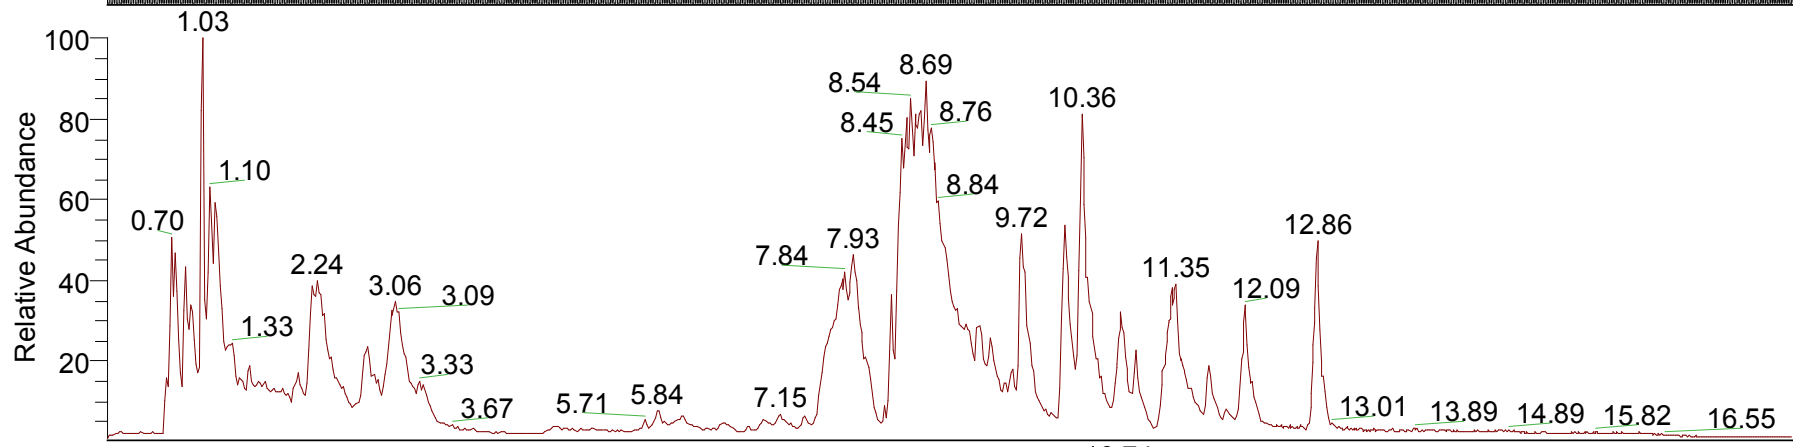

NL: 8.89E9  
m/z=  
120.00-2000.00  
F: Full ms MS  
Hilic\_N\_Junti\_202  
20118\_2per\_1\_50  
0\_1

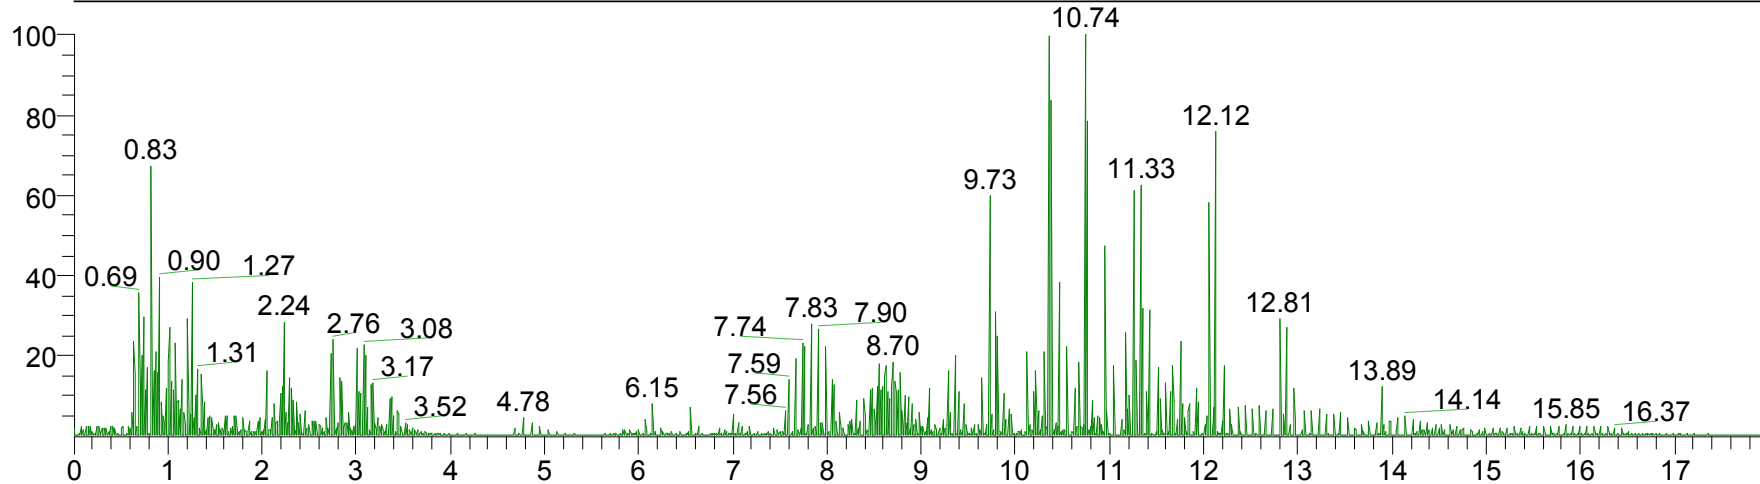

NL: 1.56E9  
TIC F: Full ms2  
MS  
Hilic\_N\_Junti\_202  
20118\_2per\_1\_50  
0\_1

Time (min)

RT: 0.00 - 17.90

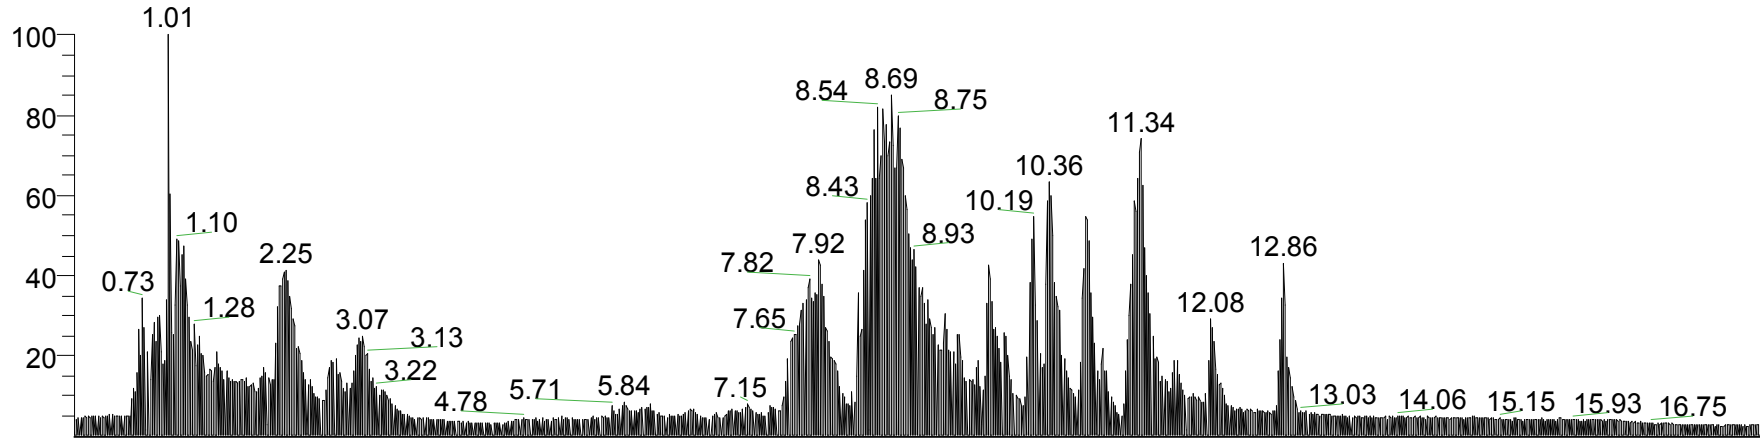

NL: 9.72E9  
TIC MS  
Hilic\_N\_Junti\_202  
20118\_2per\_1\_50  
0\_2

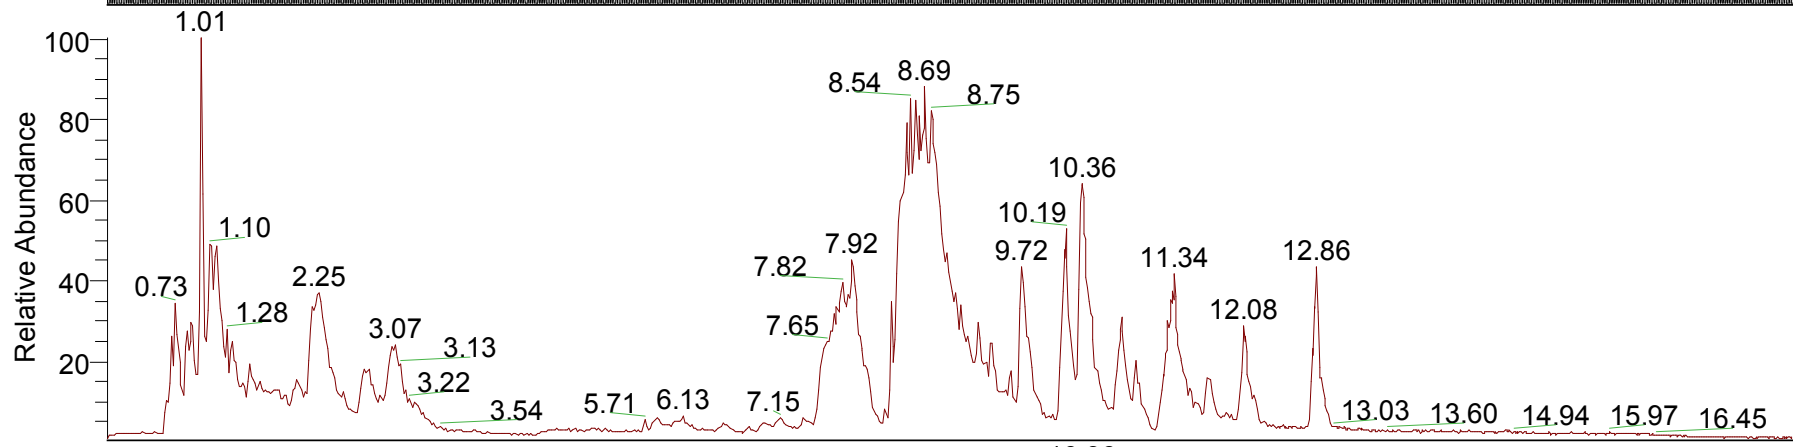

NL: 9.02E9  
m/z=  
120.00-2000.00  
F: Full ms MS  
Hilic\_N\_Junti\_202  
20118\_2per\_1\_50  
0\_2

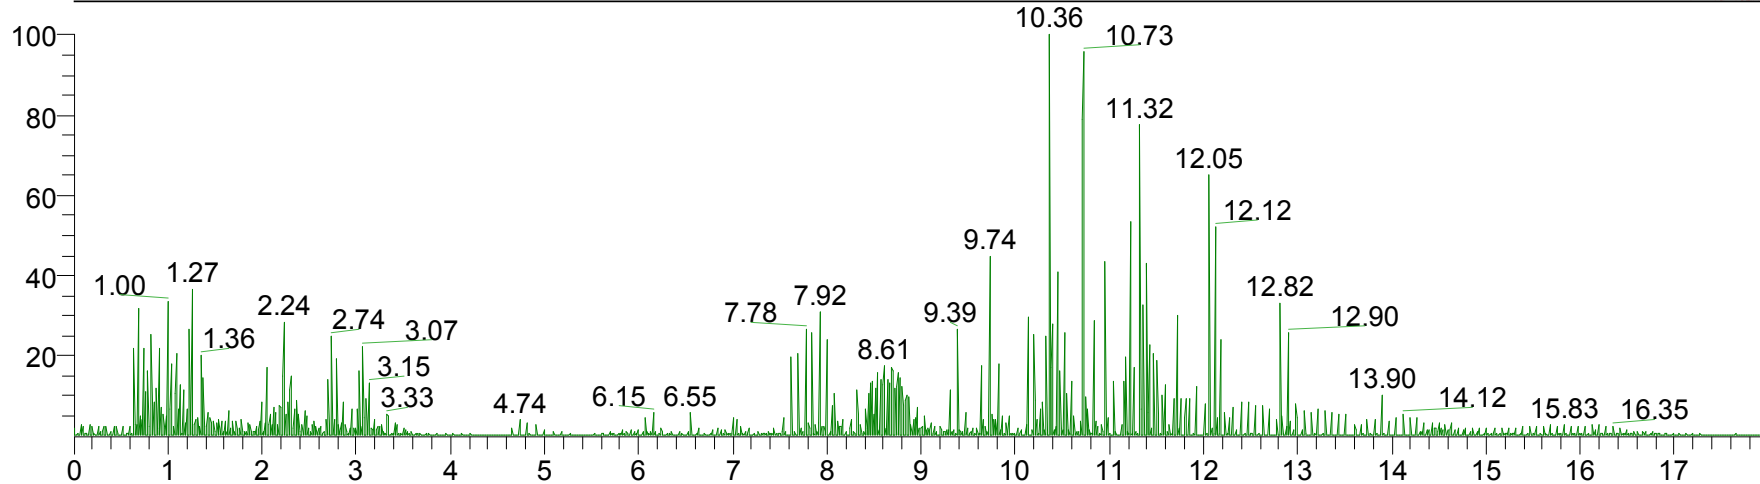

NL: 1.51E9  
TIC F: Full ms2  
MS  
Hilic\_N\_Junti\_202  
20118\_2per\_1\_50  
0\_2

Time (min)

RT: 0.00 - 17.90

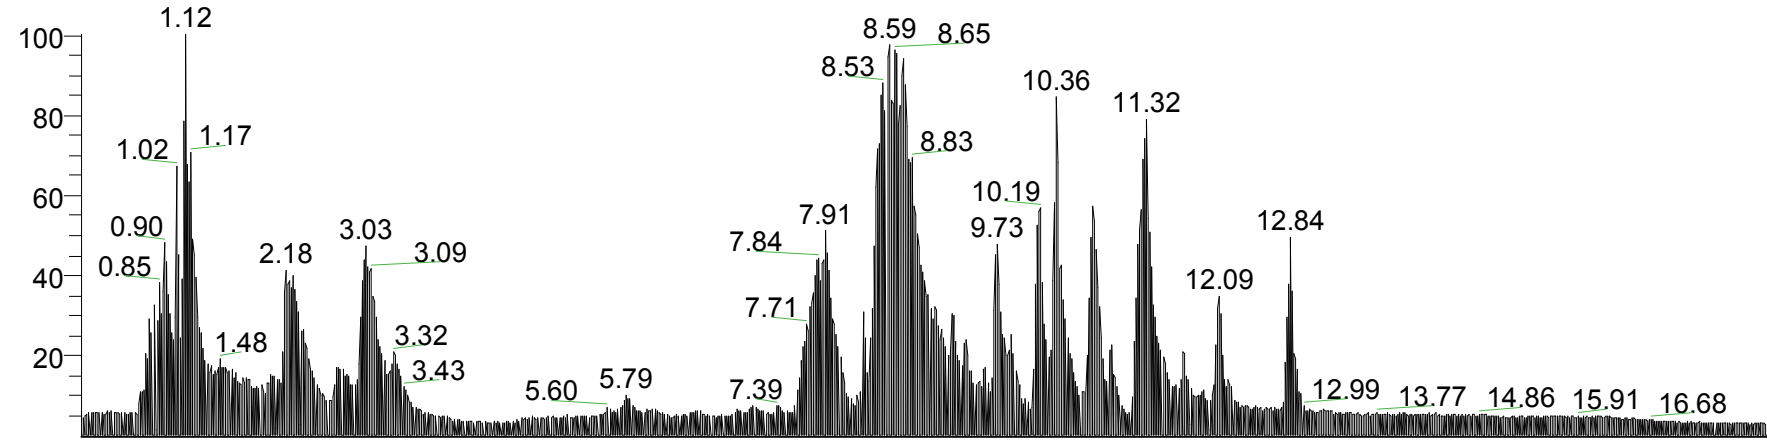

NL: 8.34E9  
TIC MS  
Hilic\_N\_Junti\_202  
20118\_2per\_1\_50  
0\_3

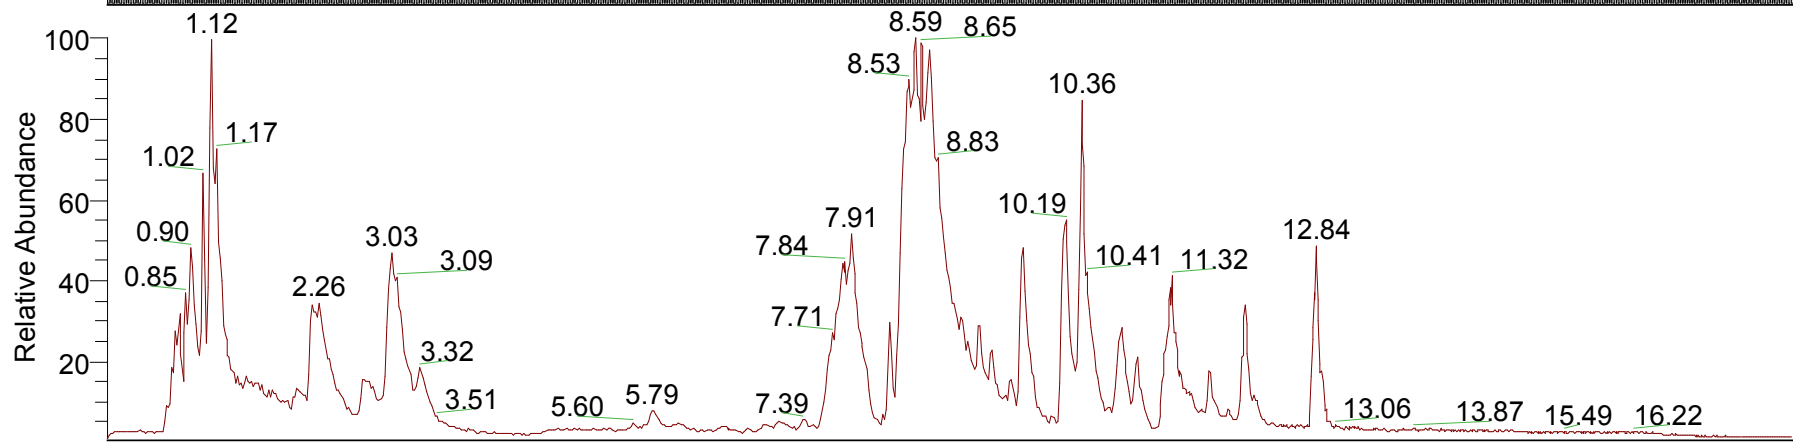

NL: 7.82E9  
m/z=  
120.00-2000.00  
F: Full ms MS  
Hilic\_N\_Junti\_202  
20118\_2per\_1\_50  
0\_3

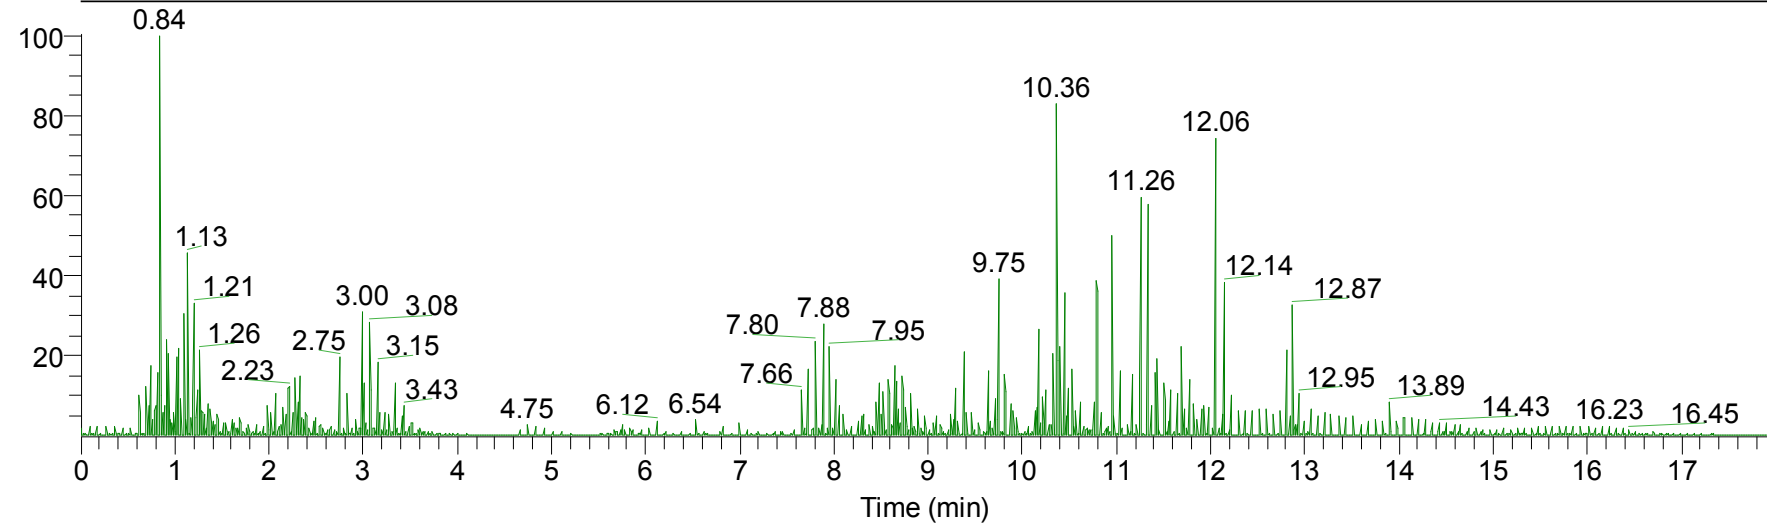

NL: 1.63E9  
TIC F: Full ms2  
MS  
Hilic\_N\_Junti\_202  
20118\_2per\_1\_50  
0\_3

RT: 0.00 - 17.90

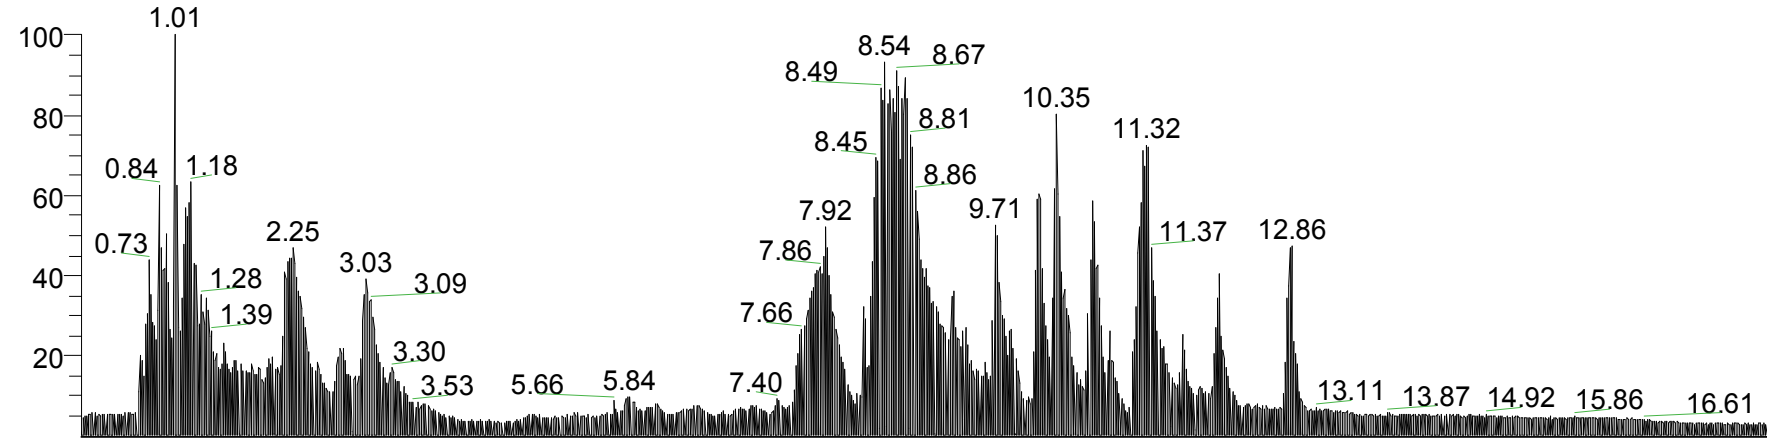

NL: 8.72E9  
TIC MS  
Hilic\_N\_Junti\_202  
20118\_2per\_1\_50  
0\_4

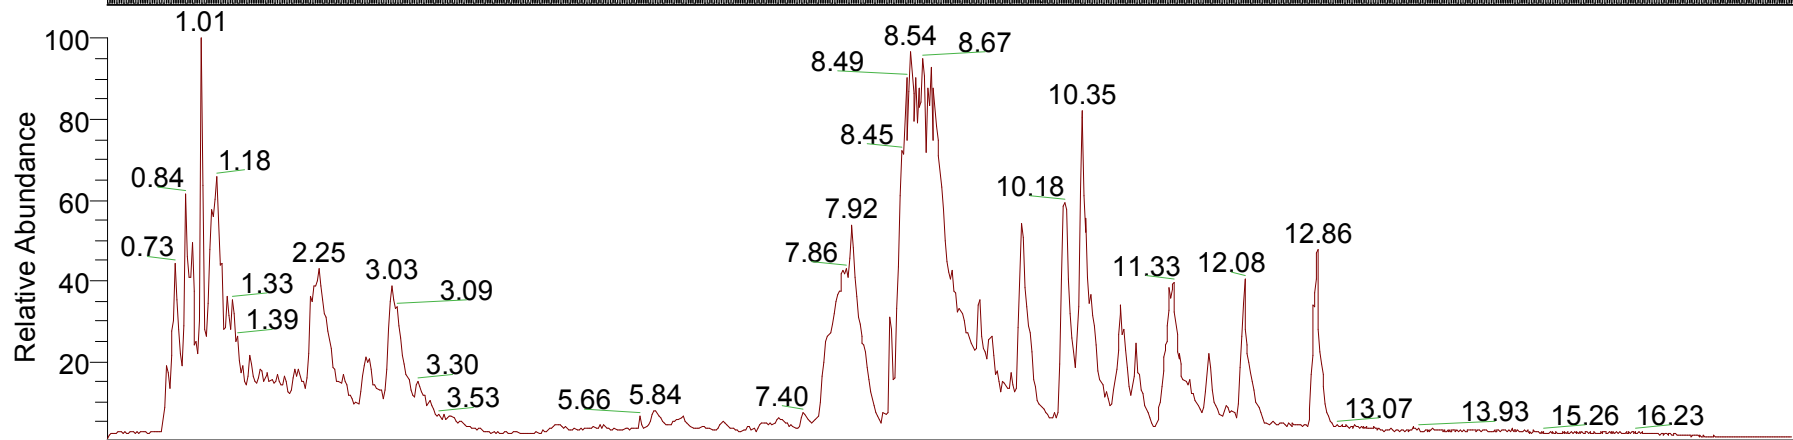

NL: 8.04E9  
m/z=  
120.00-2000.00  
F: Full ms MS  
Hilic\_N\_Junti\_202  
20118\_2per\_1\_50  
0\_4

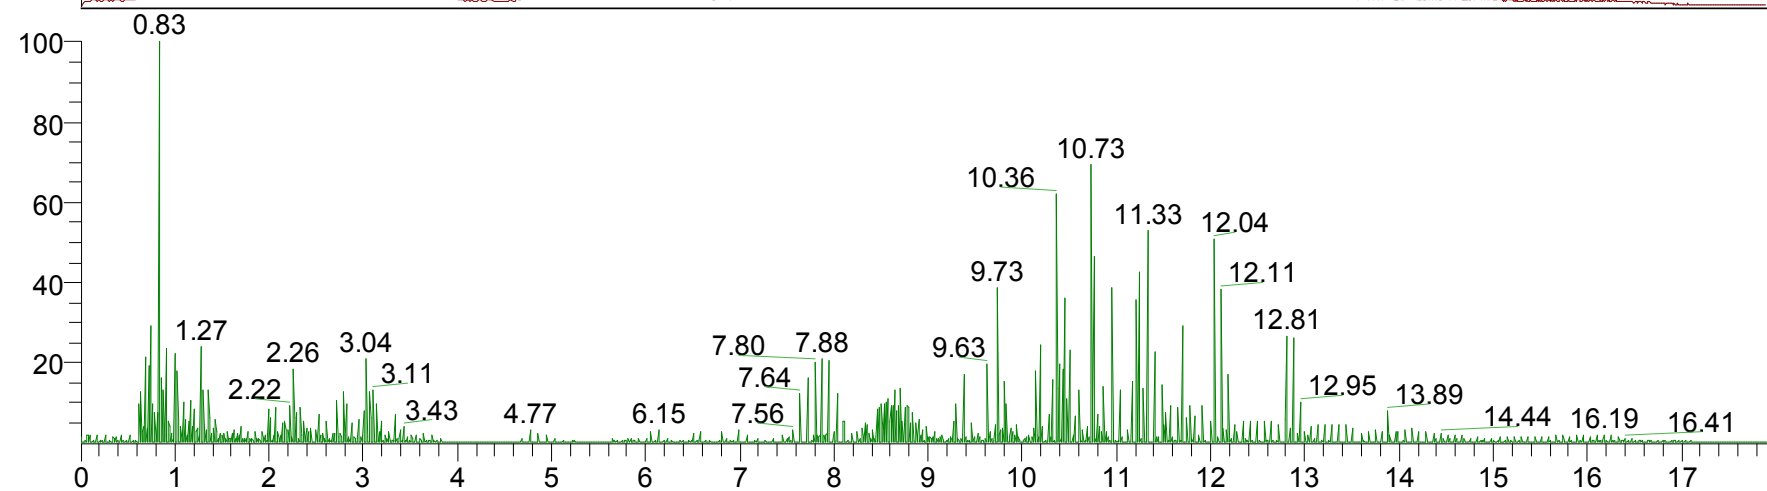

NL: 2.09E9  
TIC F: Full ms2  
MS  
Hilic\_N\_Junti\_202  
20118\_2per\_1\_50  
0\_4

Time (min)

RT: 0.00 - 17.90

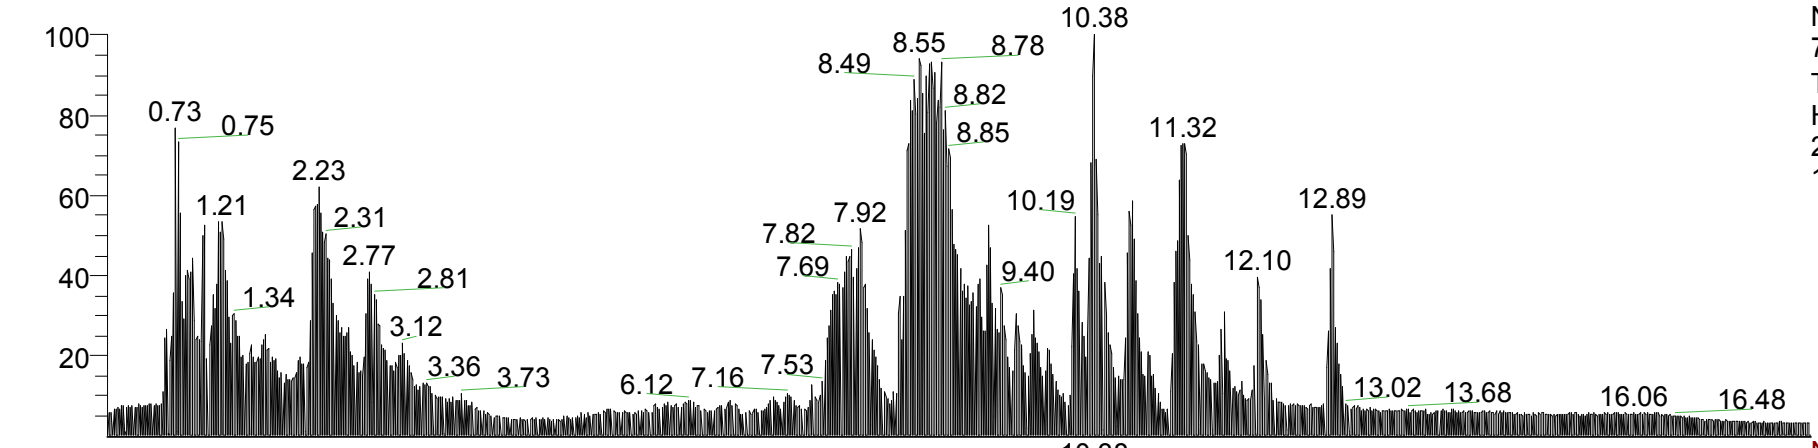

NL:  
7.98E9  
TIC MS  
Hilic\_N\_Junti\_20  
220118\_2per\_M  
1

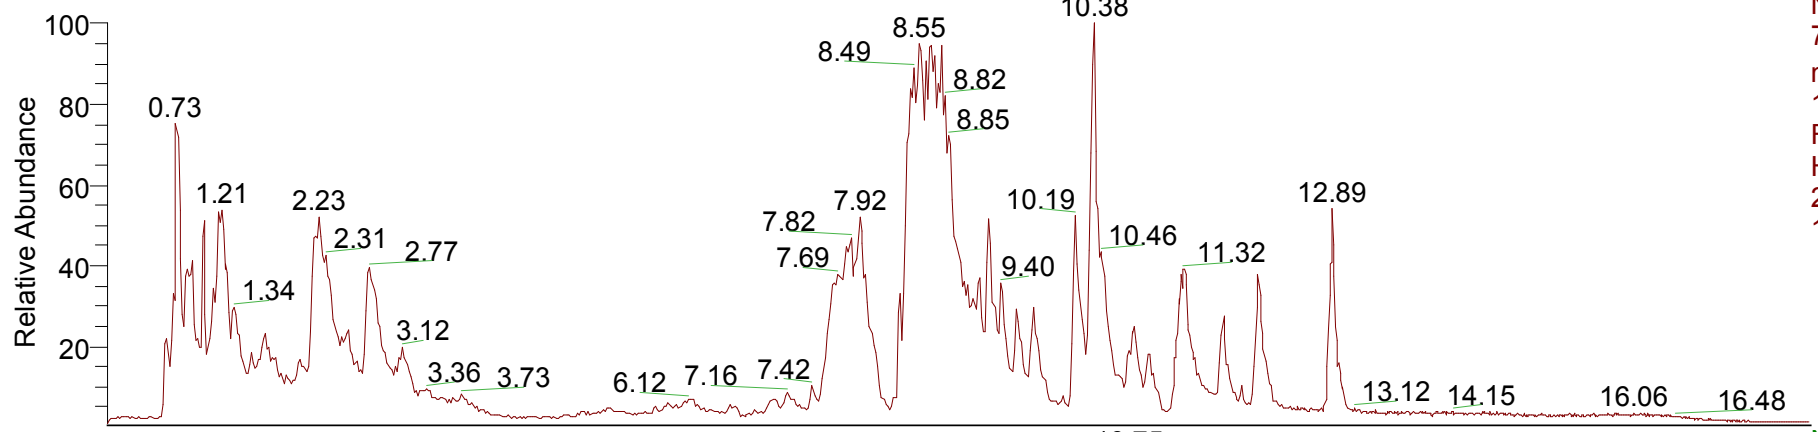

NL:  
7.55E9  
m/z=  
120.00-2000.00  
F: Full ms MS  
Hilic\_N\_Junti\_20  
220118\_2per\_M  
1

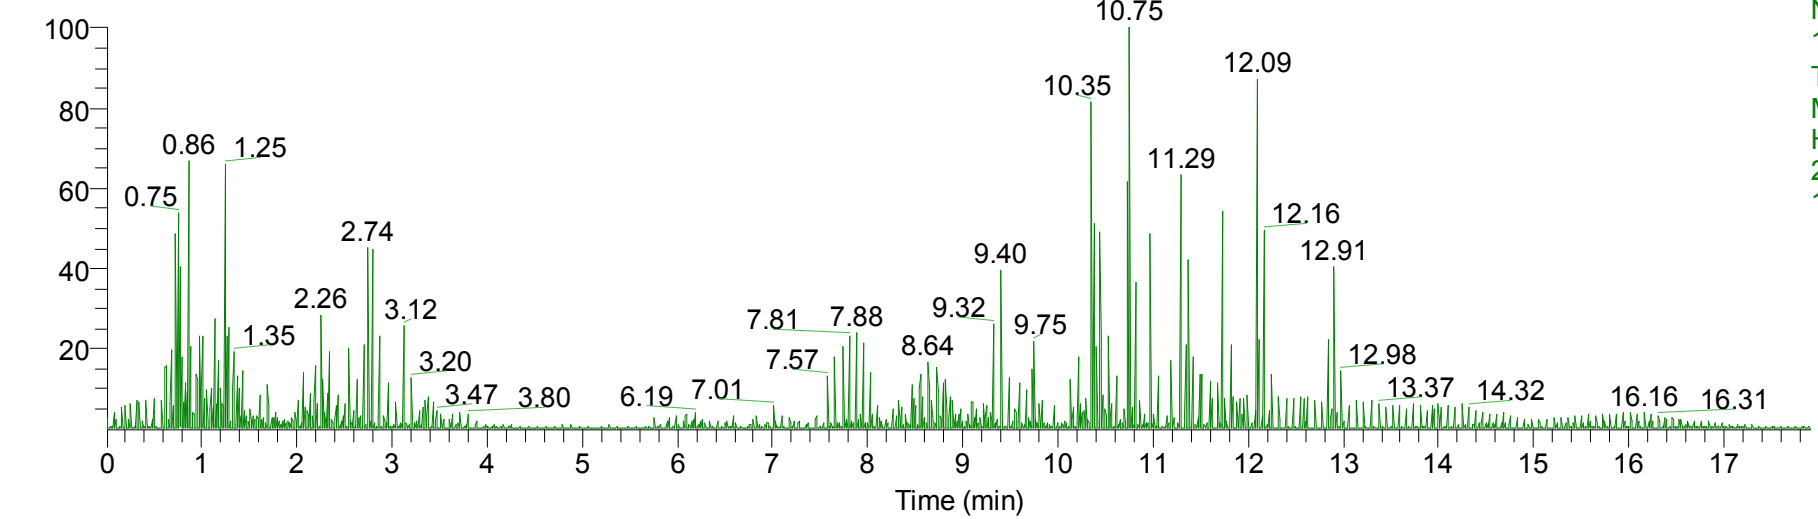

NL:  
1.53E9  
TIC F: Full ms2  
MS  
Hilic\_N\_Junti\_20  
220118\_2per\_M  
1

RT: 0.00 - 17.91

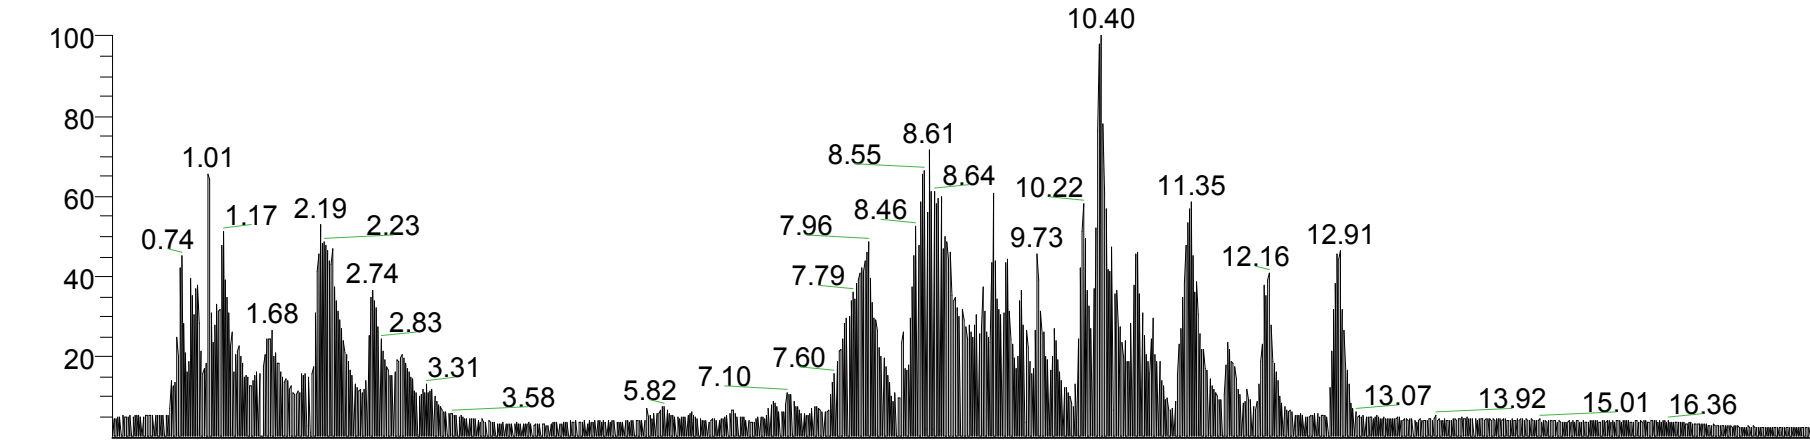

NL:  
1.12E10  
TIC MS  
Hilic\_N\_Junti\_20  
220118\_2per\_M  
2

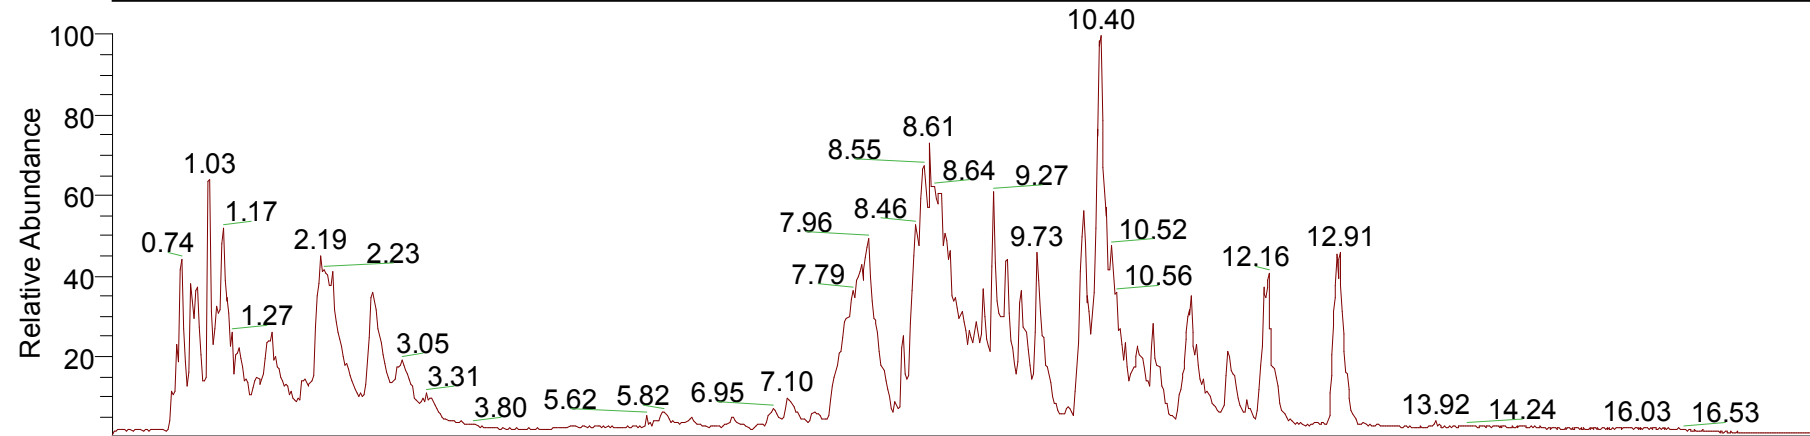

NL:  
1.06E10  
m/z=  
120.00-2000.00  
F: Full ms MS  
Hilic\_N\_Junti\_20  
220118\_2per\_M  
2

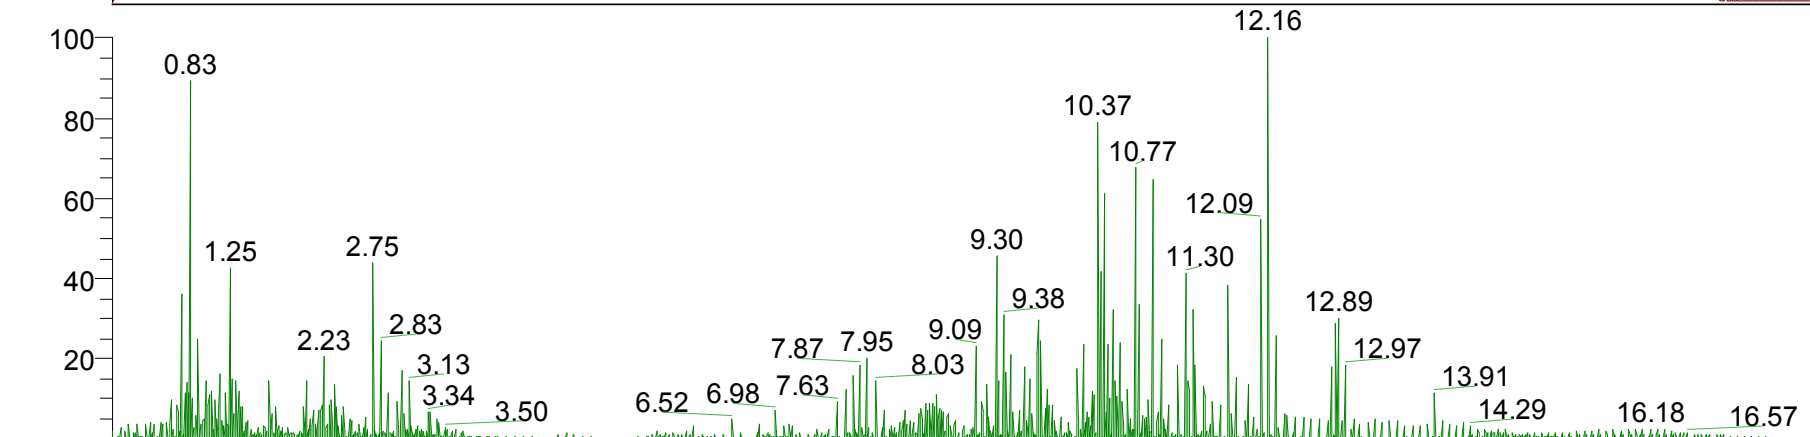

NL:  
2.36E9  
TIC F: Full ms2  
MS  
Hilic\_N\_Junti\_20  
220118\_2per\_M  
2

Time (min)

RT: 0.00 - 17.90

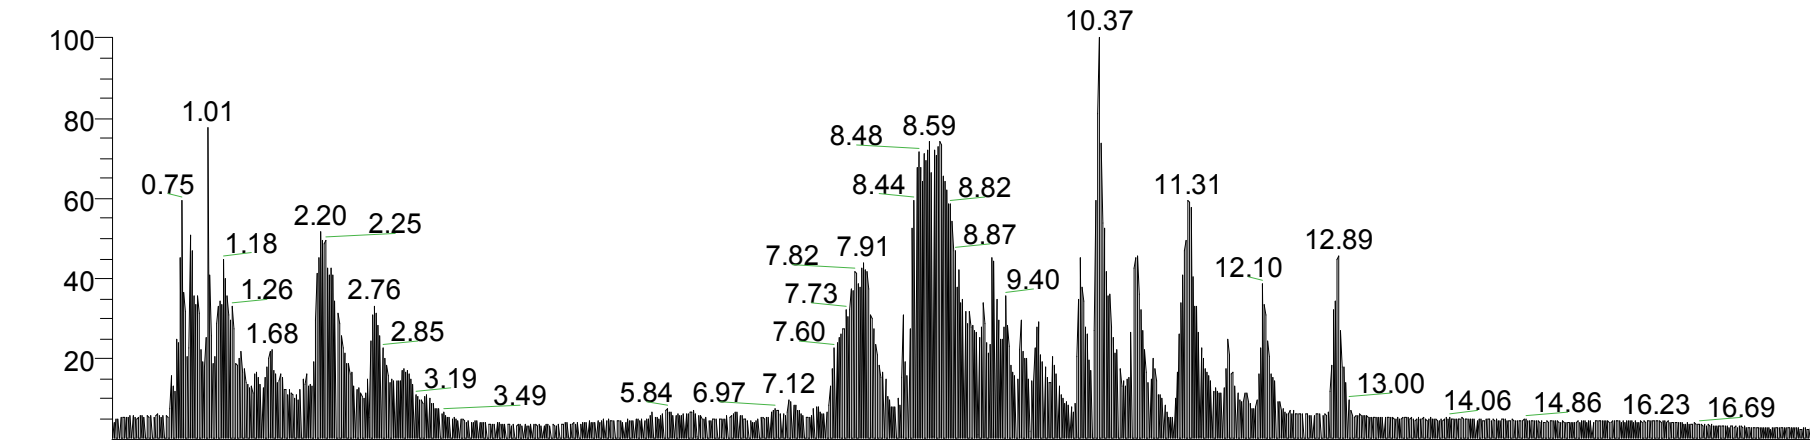

NL:  
9.92E9  
TIC MS  
Hilic\_N\_Junti\_20  
220118\_2per\_M  
3

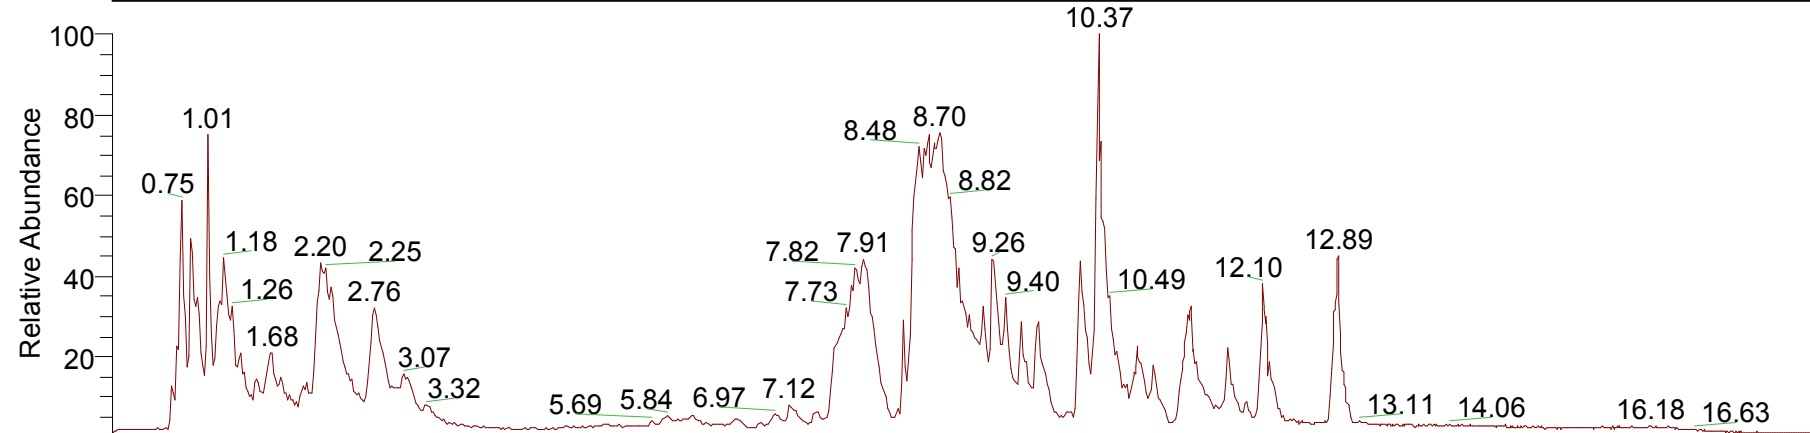

NL:  
9.40E9  
m/z=  
120.00-2000.00  
F: Full ms MS  
Hilic\_N\_Junti\_20  
220118\_2per\_M  
3

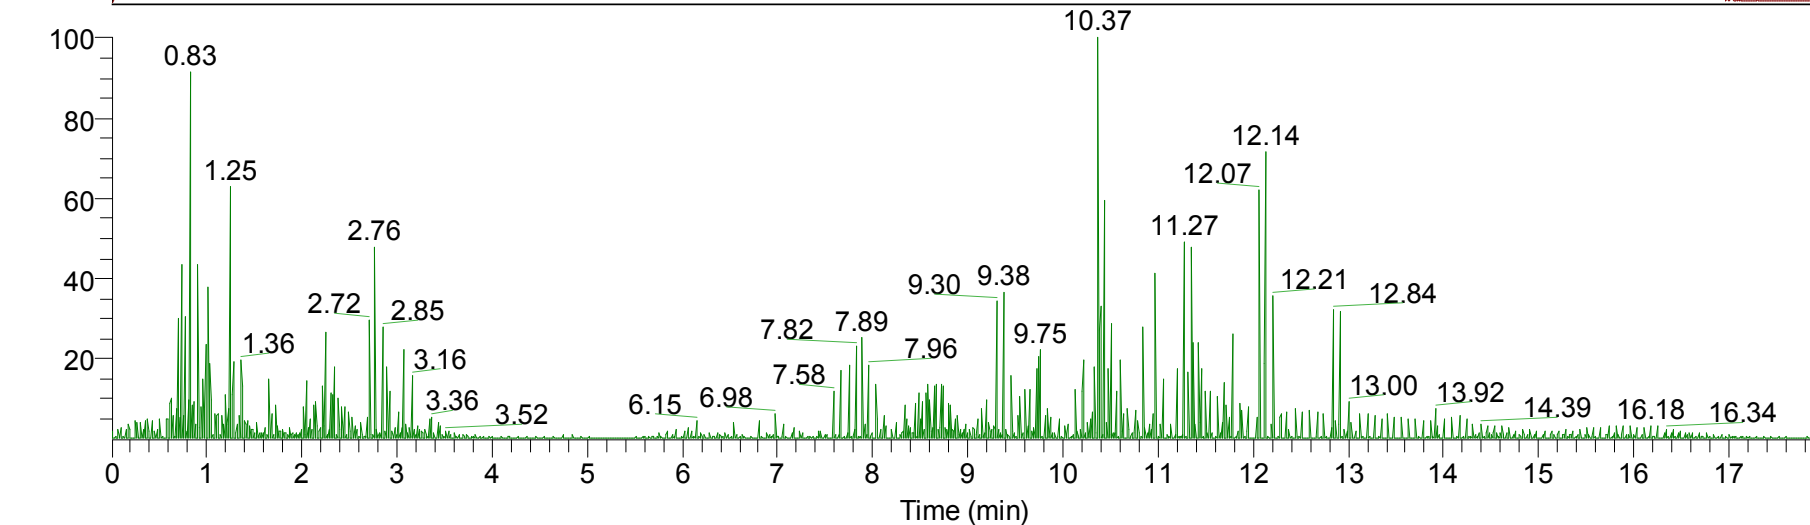

NL:  
1.74E9  
TIC F: Full ms2  
MS  
Hilic\_N\_Junti\_20  
220118\_2per\_M  
3



RT: 0.00 - 17.90

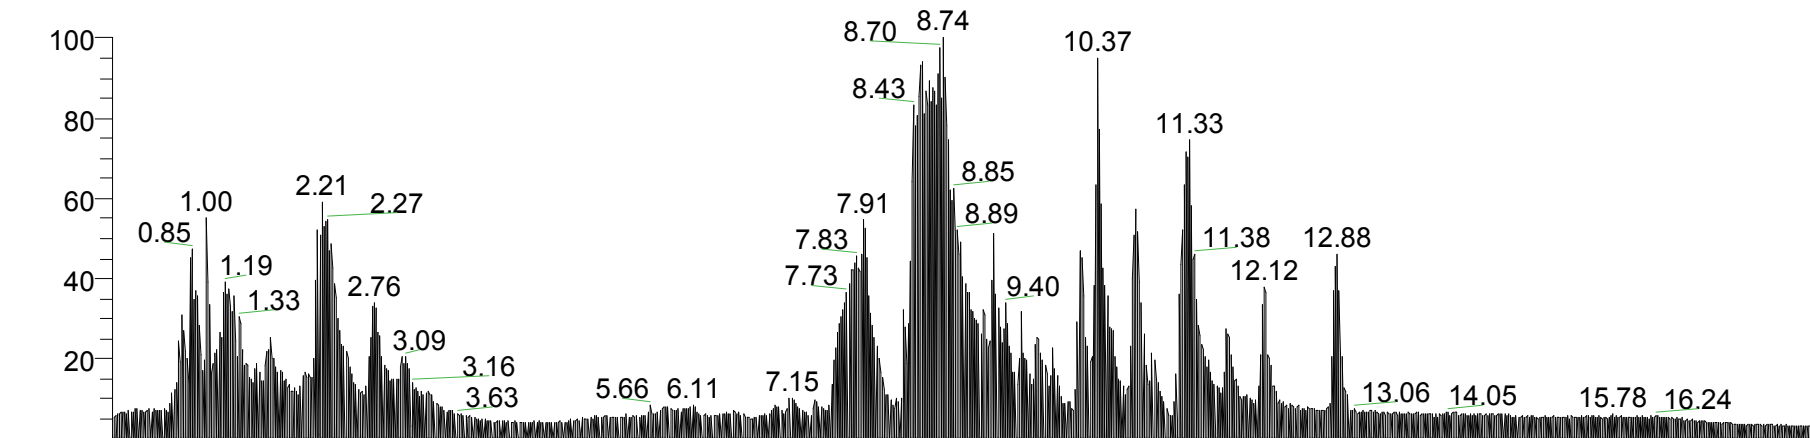

NL:  
7.89E9  
TIC MS  
Hilic\_N\_Junti\_20  
220118\_2per\_M  
4

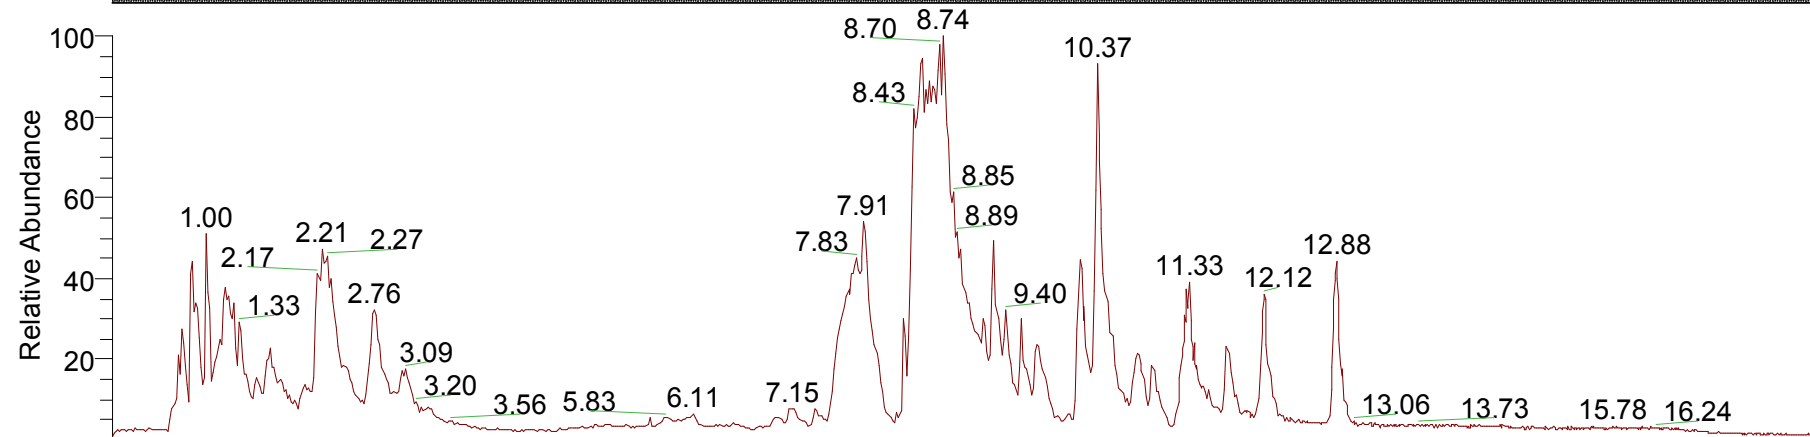

NL:  
7.57E9  
m/z=  
120.00-2000.00  
F: Full ms MS  
Hilic\_N\_Junti\_20  
220118\_2per\_M  
4

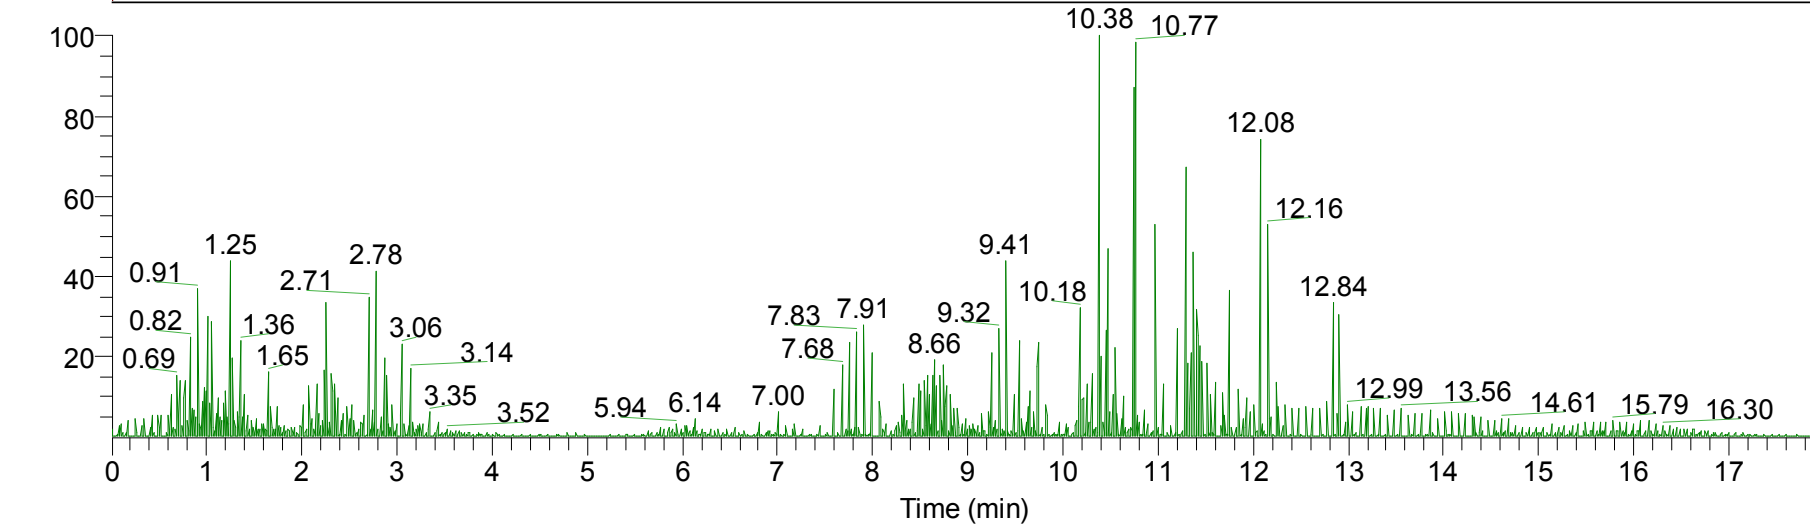

NL:  
1.43E9  
TIC F: Full ms2  
MS  
Hilic\_N\_Junti\_20  
220118\_2per\_M  
4

RT: 0.00 - 17.90

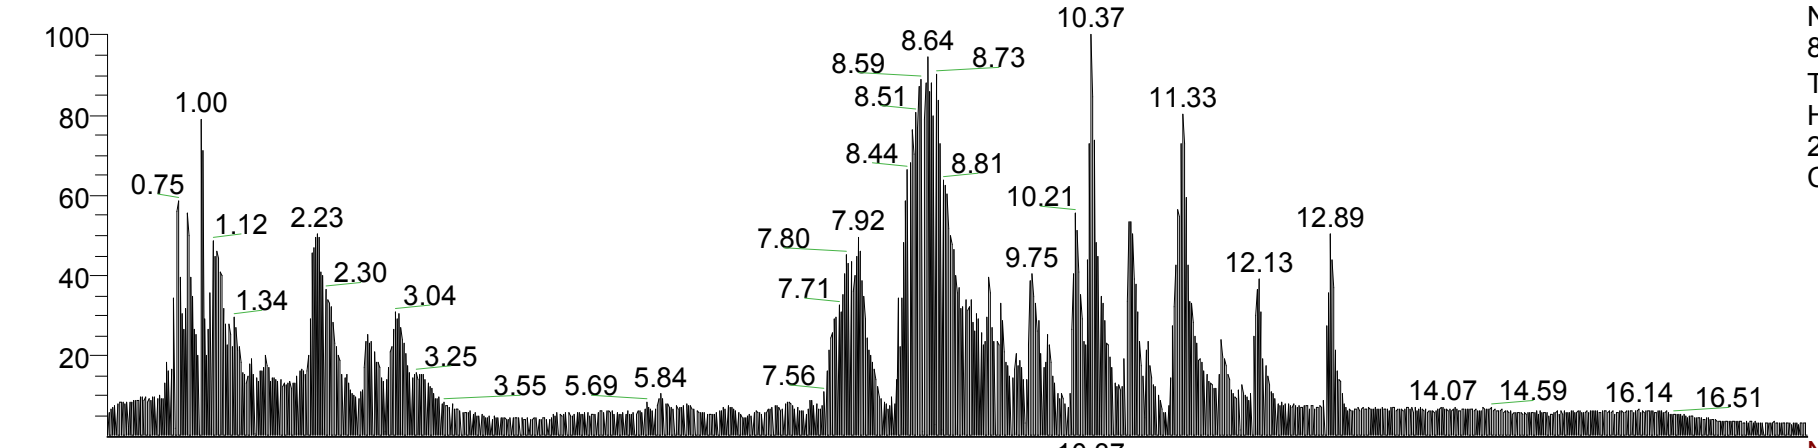

NL:  
8.04E9  
TIC MS  
Hilic\_N\_Junti\_20  
220118\_2per\_Q  
C1

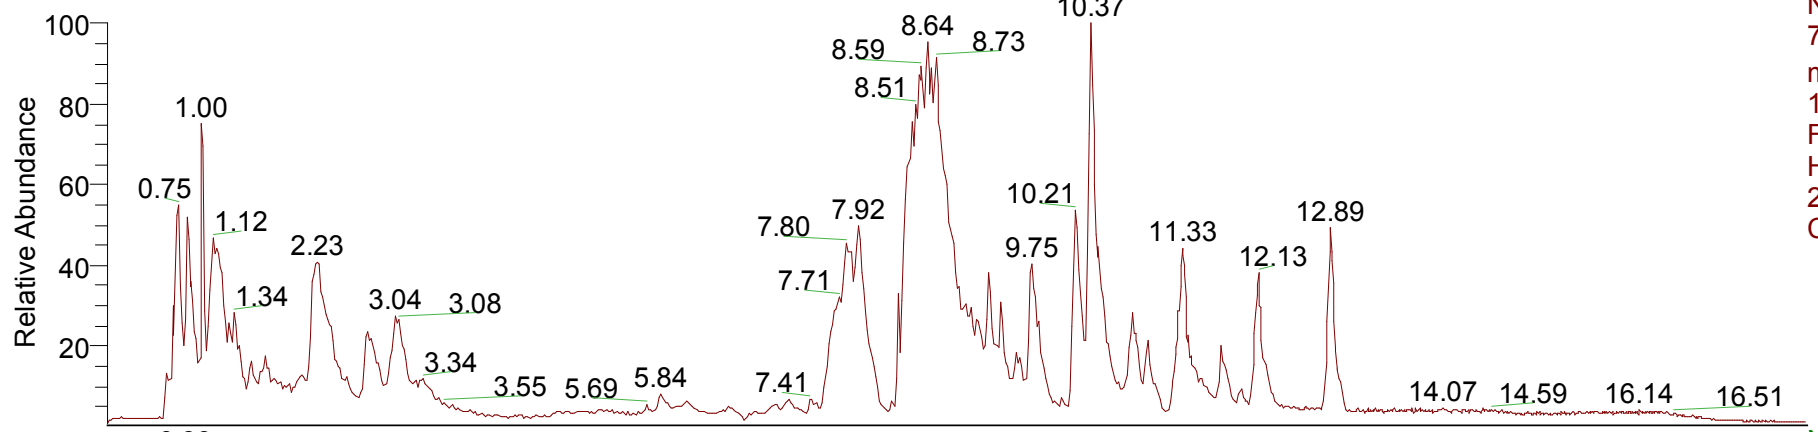

NL:  
7.59E9  
m/z=  
120.00-2000.00  
F: Full ms MS  
Hilic\_N\_Junti\_20  
220118\_2per\_Q  
C1

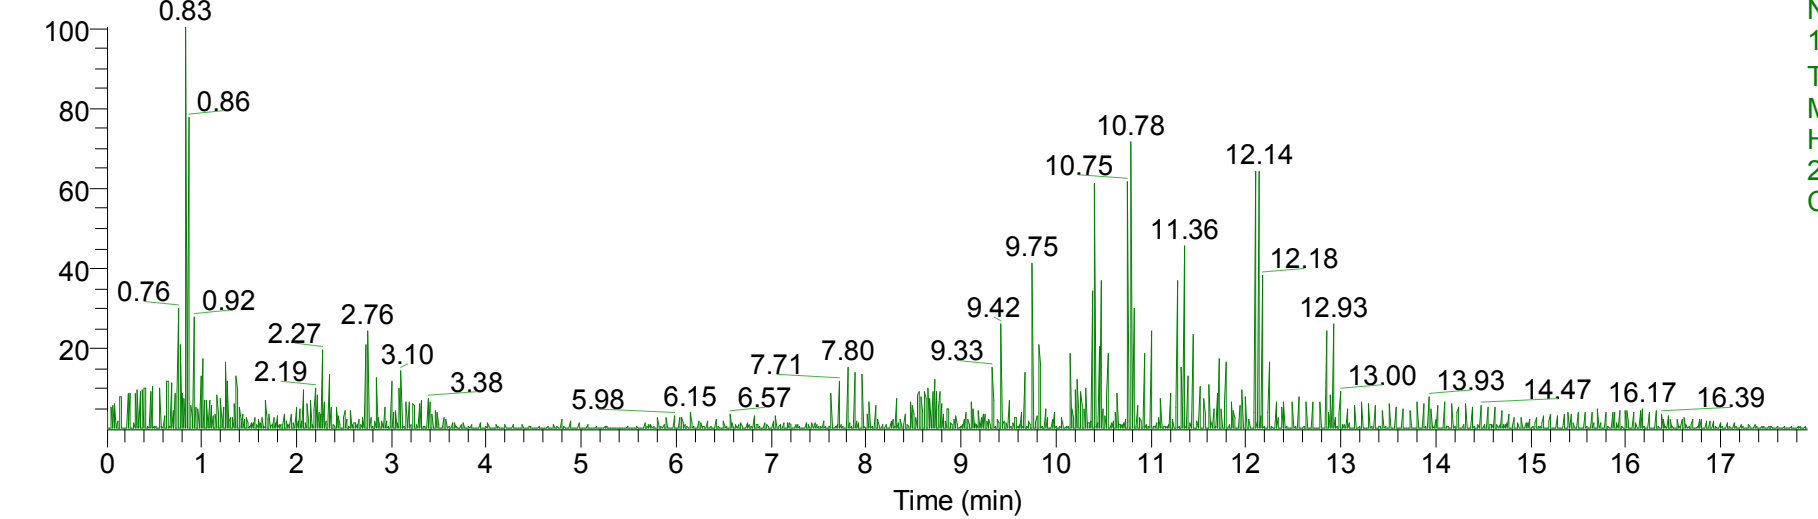

NL:  
1.93E9  
TIC F: Full ms2  
MS  
Hilic\_N\_Junti\_20  
220118\_2per\_Q  
C1

RT: 0.00 - 17.90

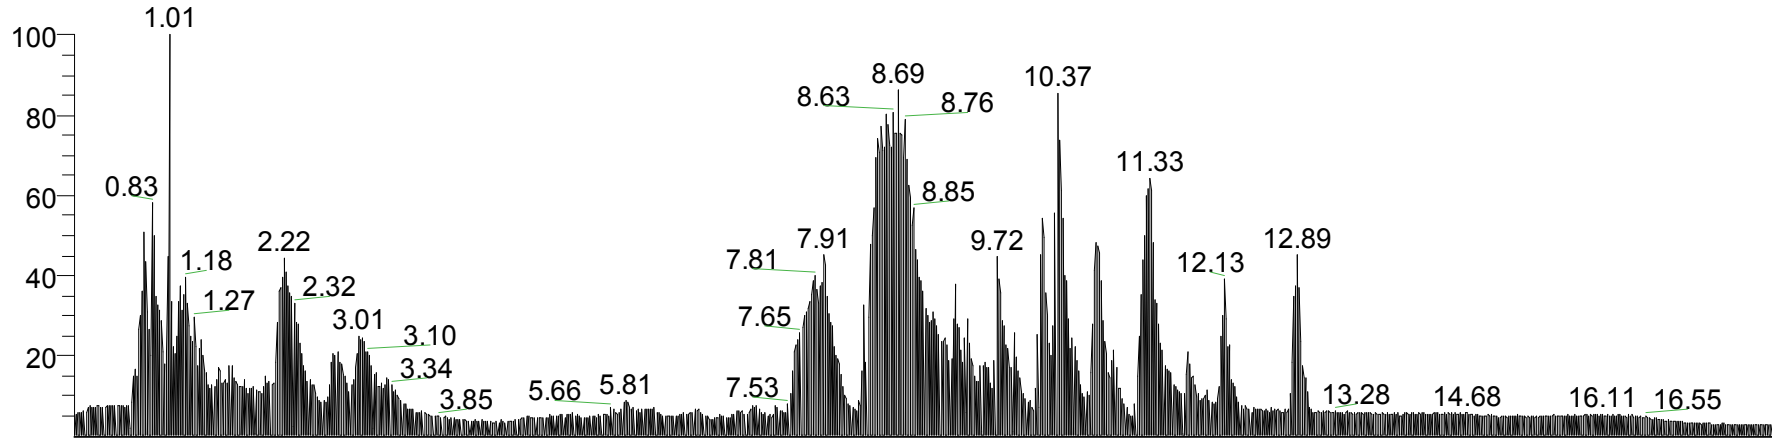

NL:  
9.00E9  
TIC MS  
Hilic\_N\_Junti\_20  
220118\_2per\_Q  
C2

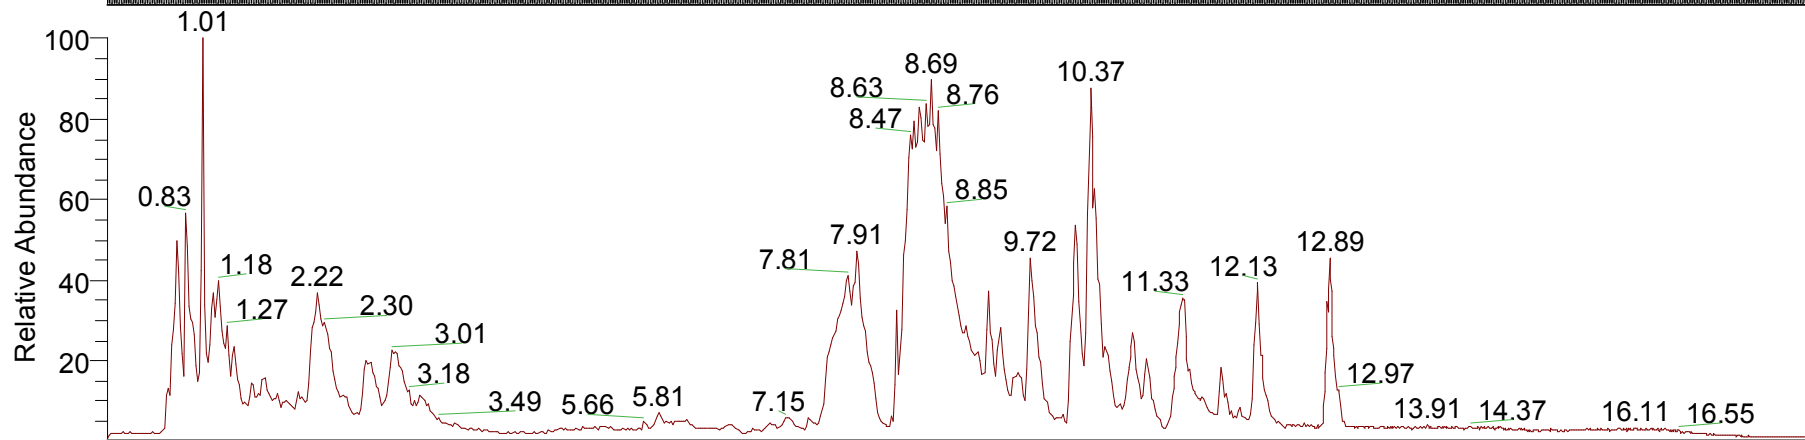

NL:  
8.28E9  
m/z=  
120.00-2000.00  
F: Full ms MS  
Hilic\_N\_Junti\_20  
220118\_2per\_Q  
C2

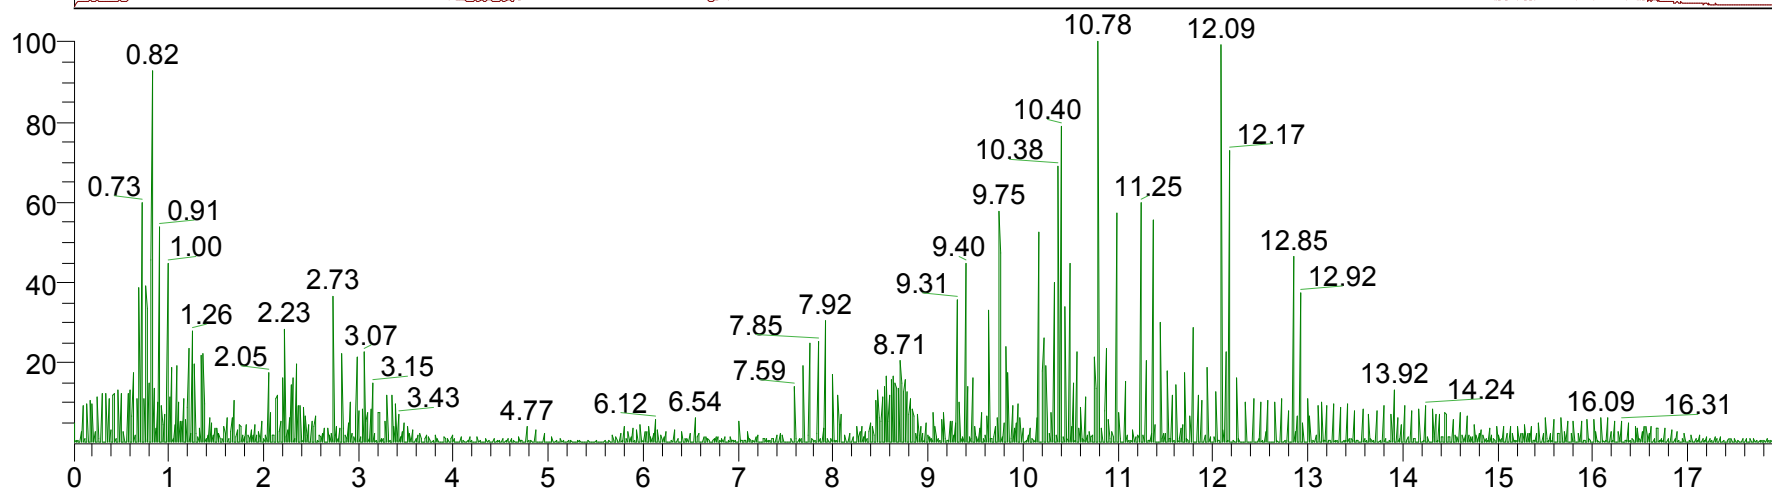

NL:  
1.19E9  
TIC F: Full ms2  
MS  
Hilic\_N\_Junti\_20  
220118\_2per\_Q  
C2

Time (min)

RT: 0.00 - 17.90

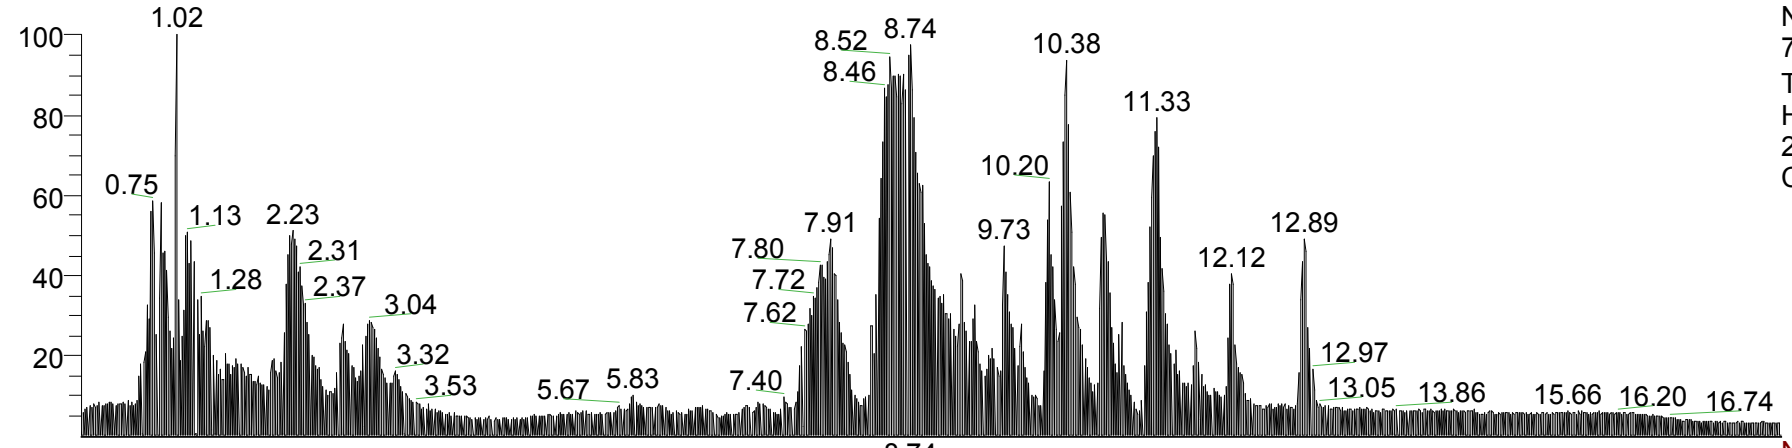

NL:  
7.85E9  
TIC MS  
Hilic\_N\_Junti\_20  
220118\_2per\_Q  
C3

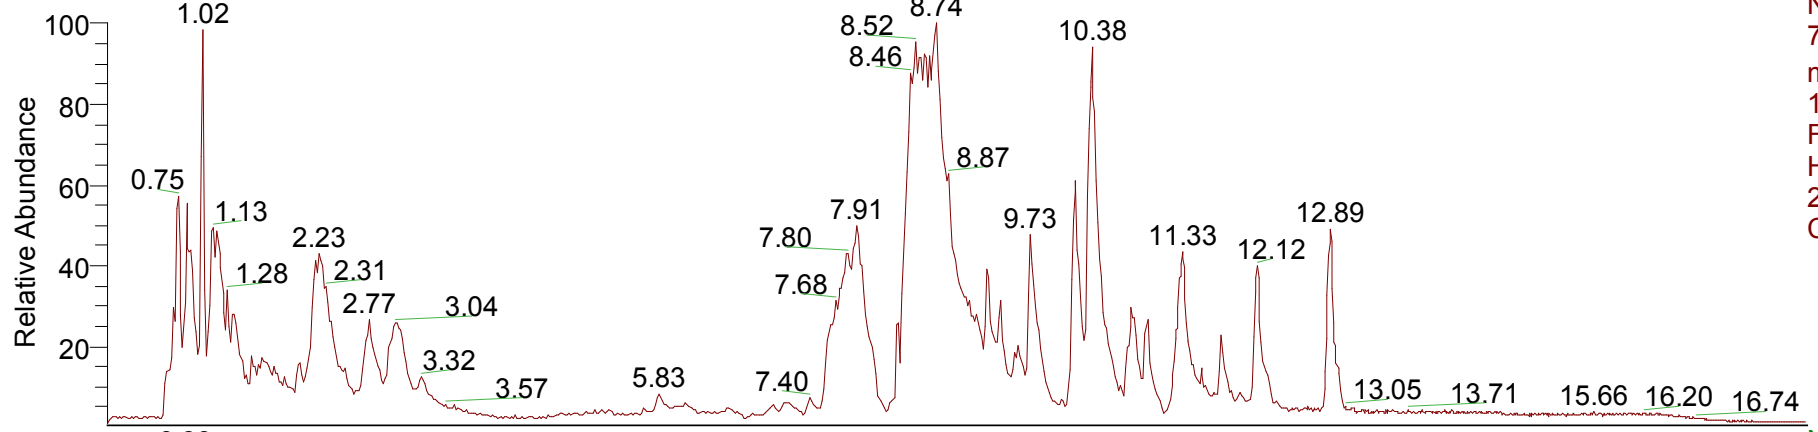

NL:  
7.36E9  
m/z=  
120.00-2000.00  
F: Full ms MS  
Hilic\_N\_Junti\_20  
220118\_2per\_Q  
C3

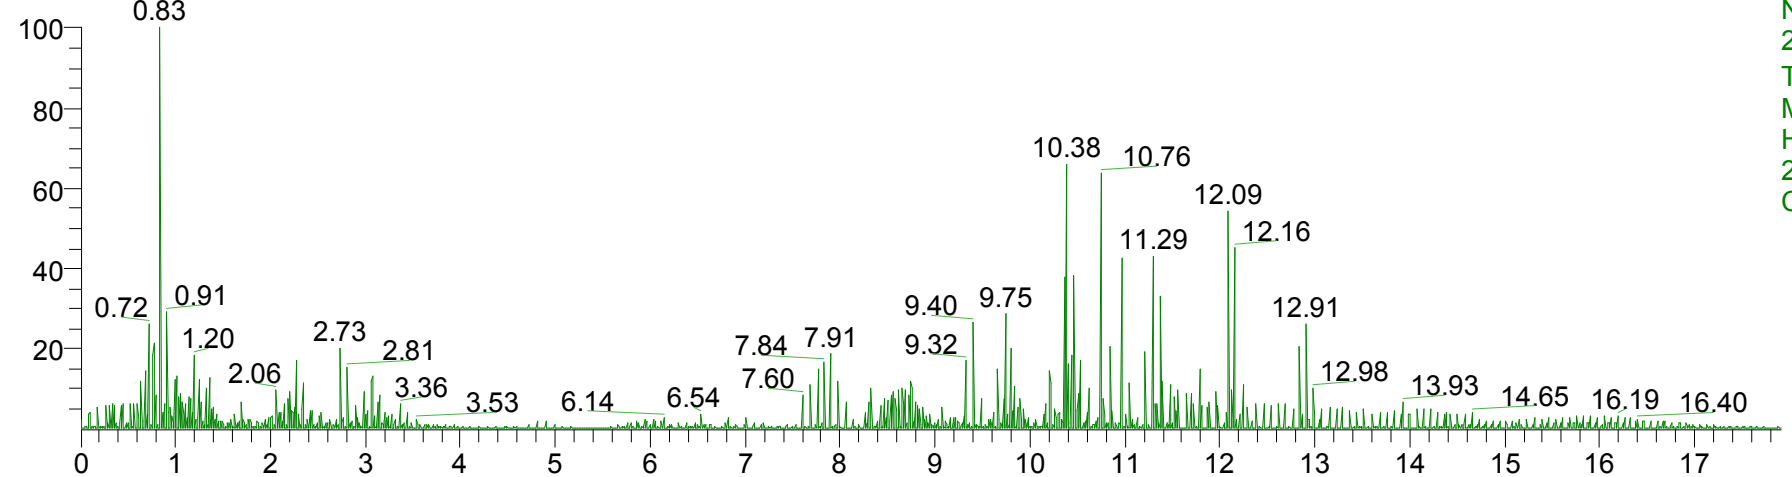

NL:  
2.09E9  
TIC F: Full ms2  
MS  
Hilic\_N\_Junti\_20  
220118\_2per\_Q  
C3

Time (min)

RT: 0.00 - 17.90

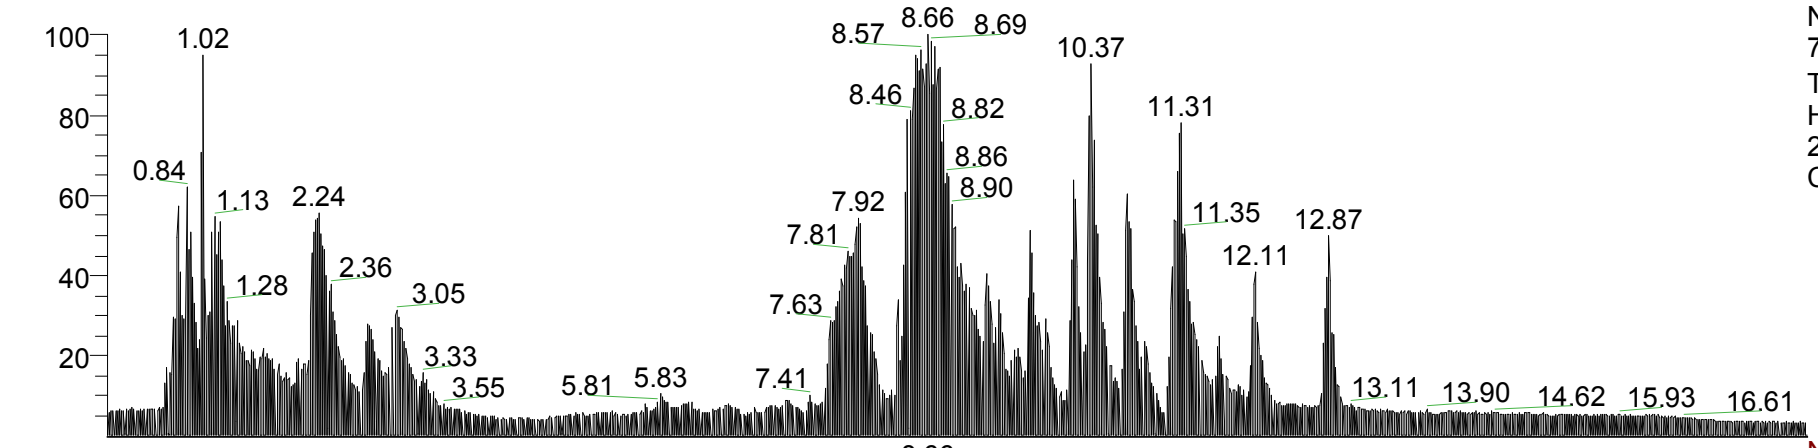

NL:  
7.79E9  
TIC MS  
Hilic\_N\_Junti\_20  
220118\_2per\_Q  
C4

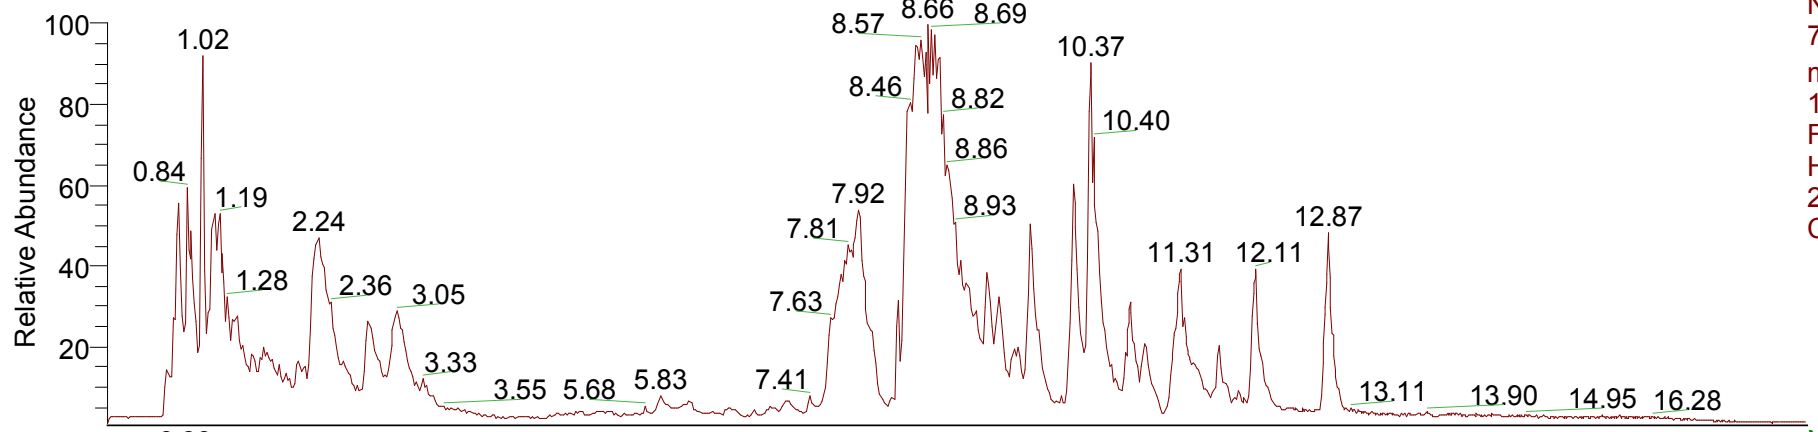

NL:  
7.48E9  
m/z=  
120.00-2000.00  
F: Full ms MS  
Hilic\_N\_Junti\_20  
220118\_2per\_Q  
C4

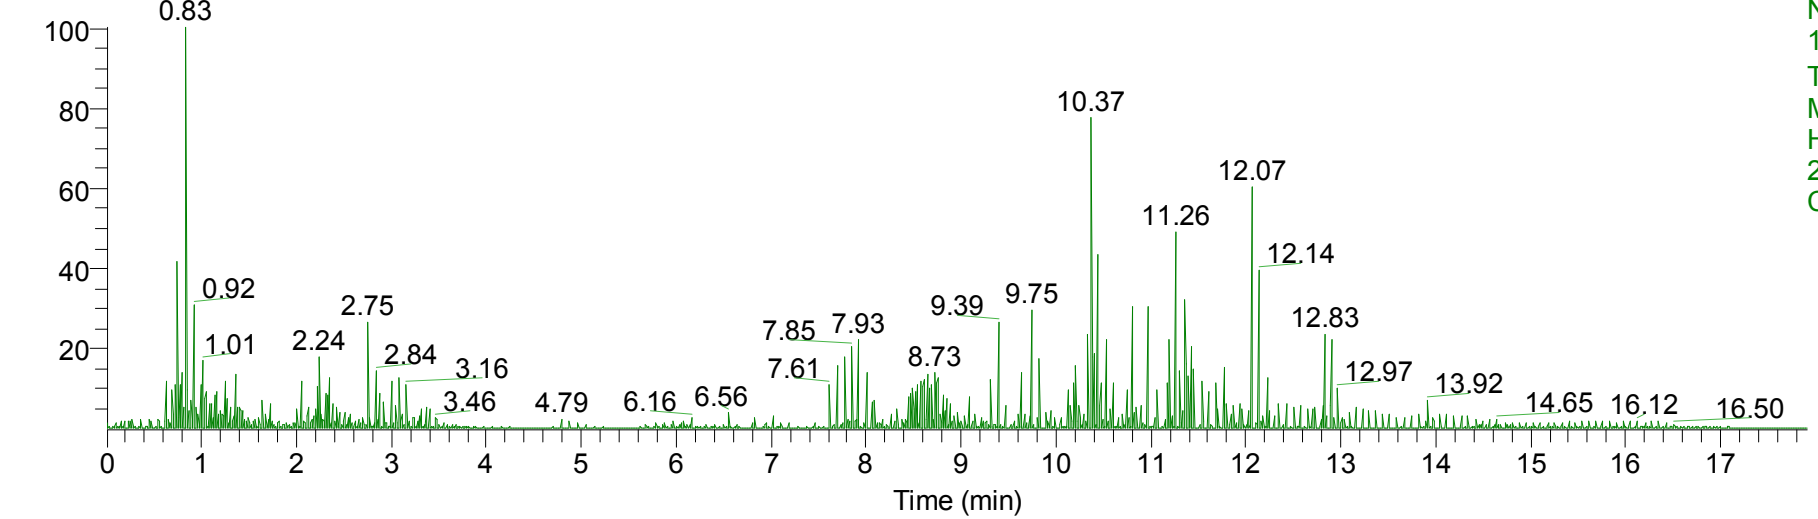

NL:  
1.98E9  
TIC F: Full ms2  
MS  
Hilic\_N\_Junti\_20  
220118\_2per\_Q  
C4

RT: 0.00 - 17.90

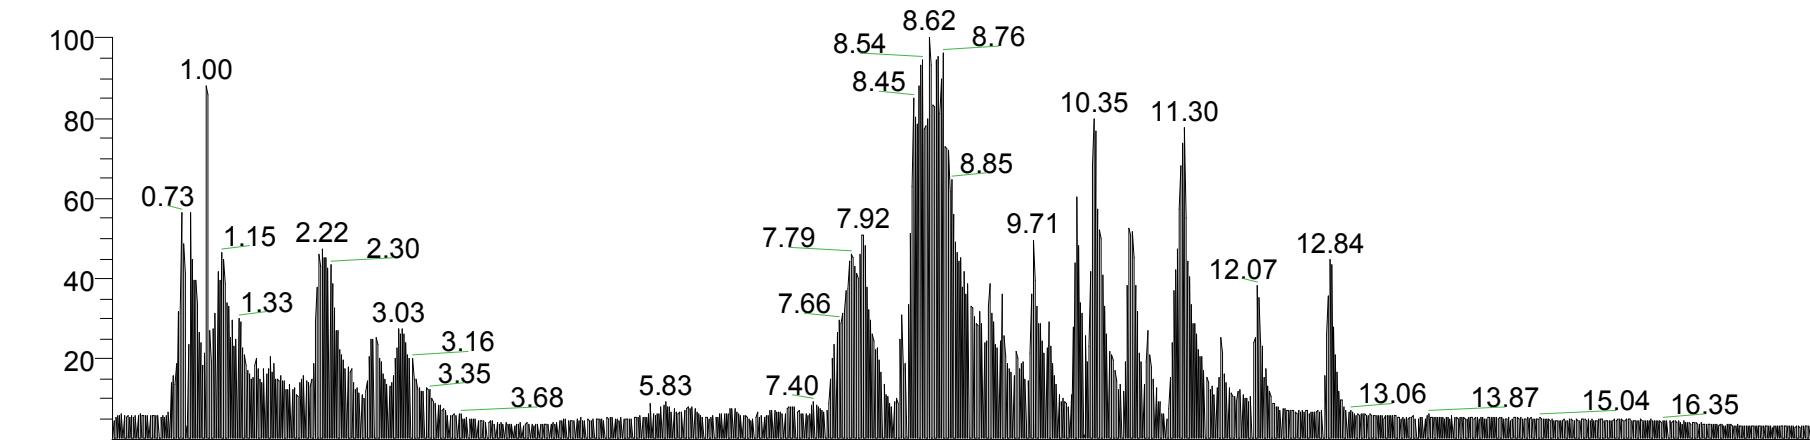

NL:  
8.29E9  
TIC MS  
Hilic\_N\_Junti\_20  
220118\_2per\_Q  
C5

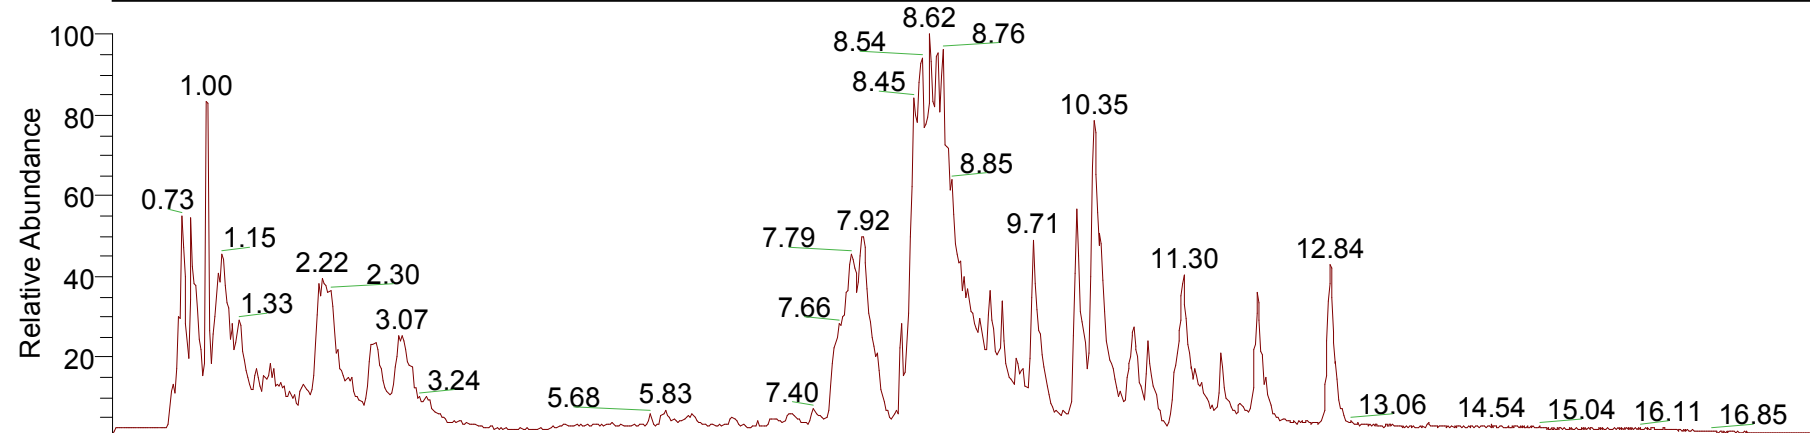

NL:  
7.96E9  
m/z=  
120.00-2000.00  
F: Full ms MS  
Hilic\_N\_Junti\_20  
220118\_2per\_Q  
C5

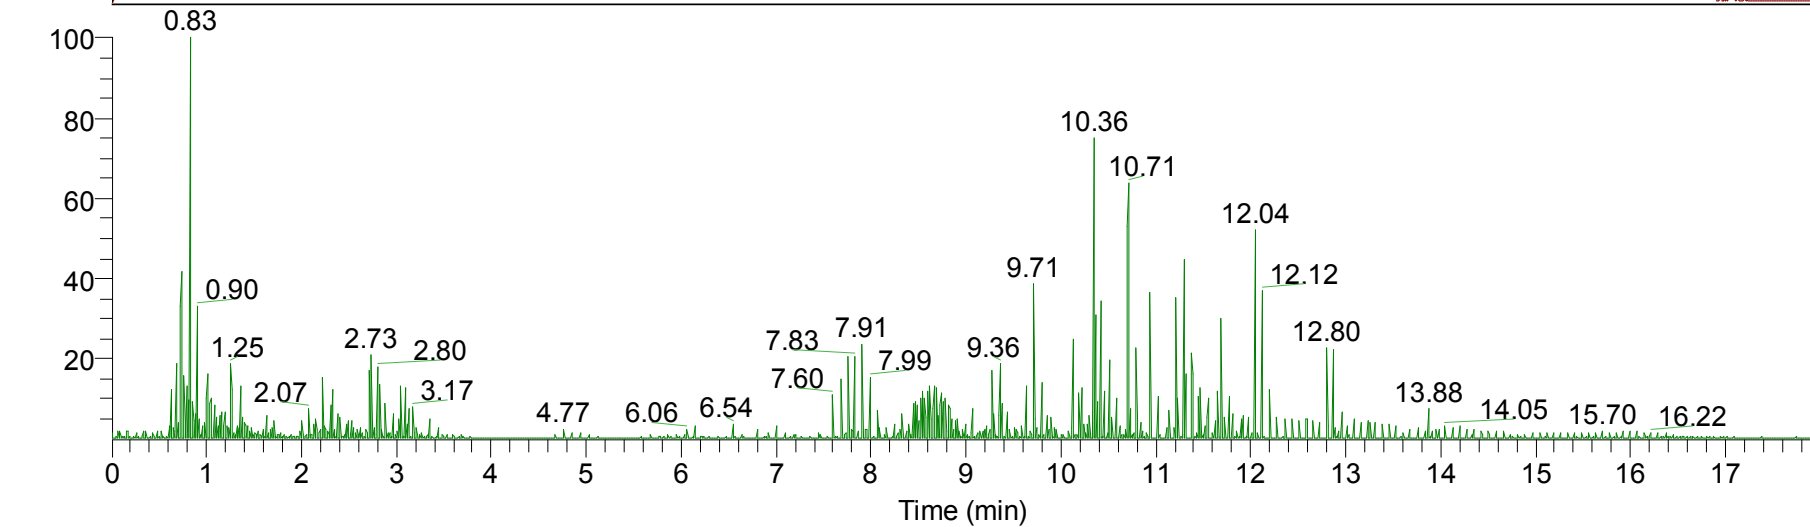

NL:  
2.06E9  
TIC F: Full ms2  
MS  
Hilic\_N\_Junti\_20  
220118\_2per\_Q  
C5

RT: 0.00 - 17.90

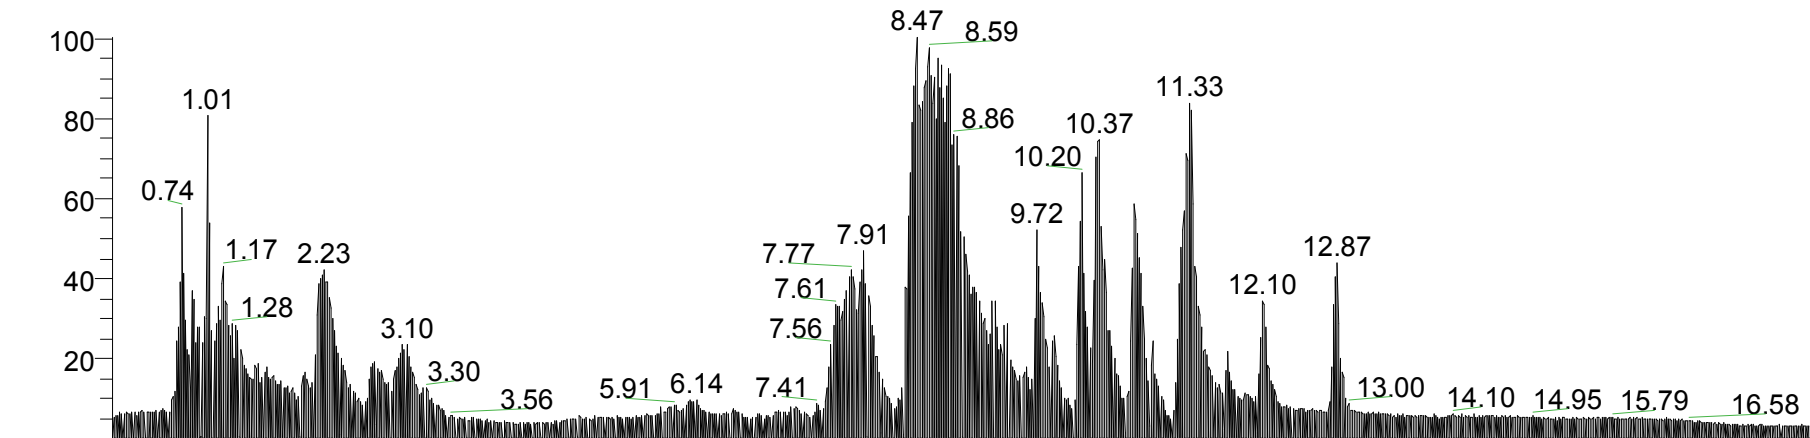

NL:  
7.99E9  
TIC MS  
Hilic\_N\_Junti\_20  
220118\_2per\_S  
1

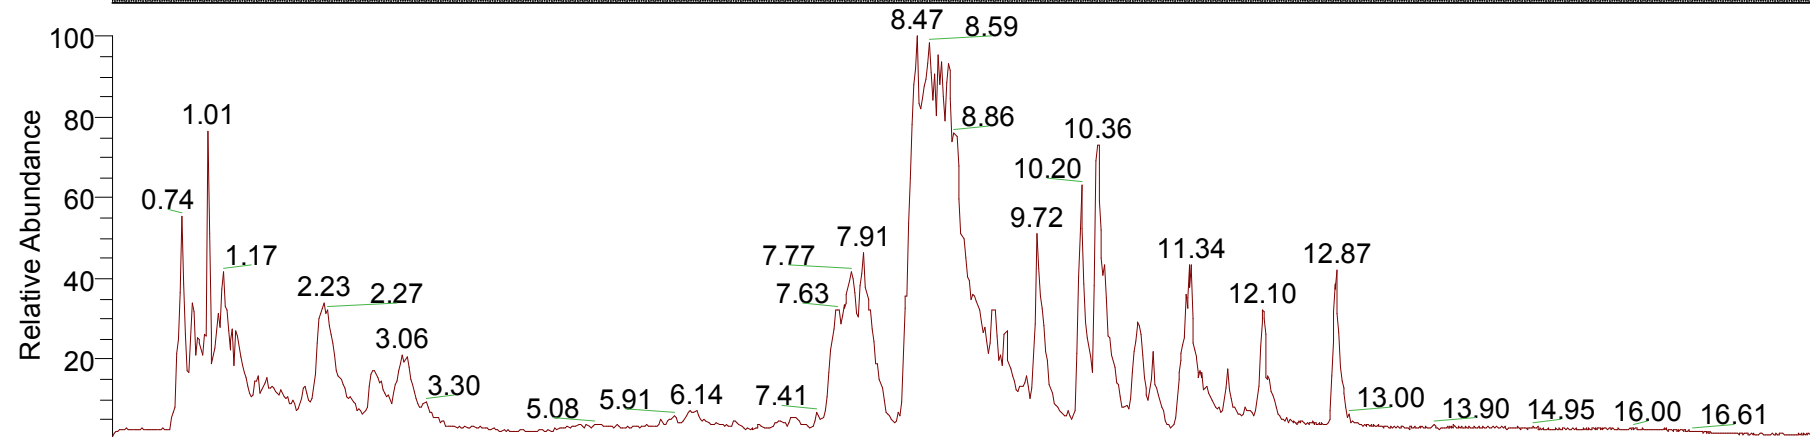

NL:  
7.63E9  
m/z=  
120.00-2000.00  
F: Full ms MS  
Hilic\_N\_Junti\_20  
220118\_2per\_S  
1

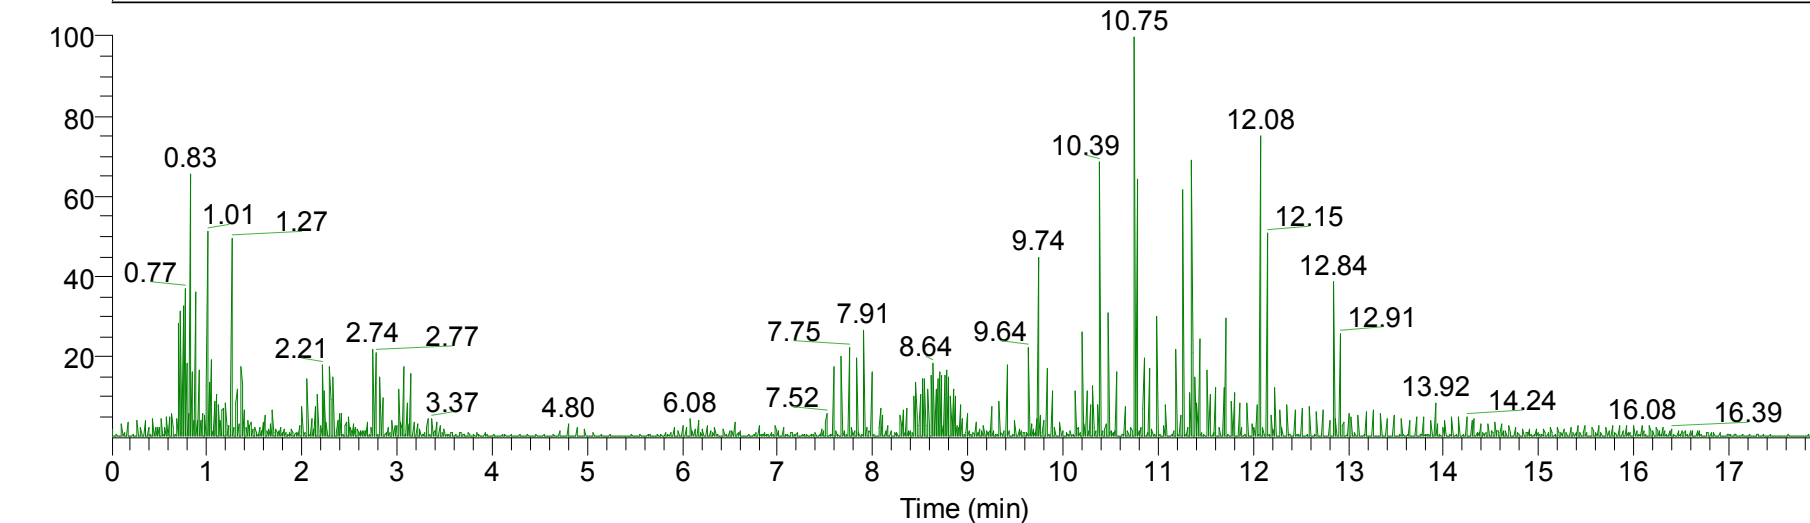

NL:  
1.49E9  
TIC F: Full ms2  
MS  
Hilic\_N\_Junti\_20  
220118\_2per\_S  
1

RT: 0.00 - 17.90

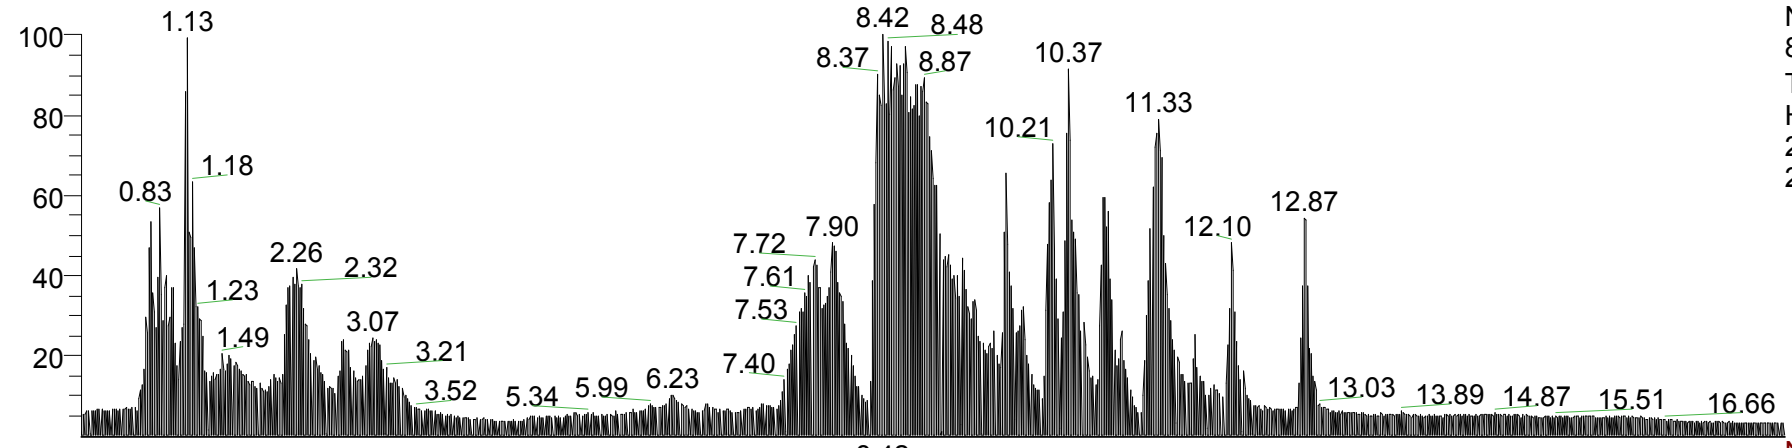

NL:  
8.19E9  
TIC MS  
Hilic\_N\_Junti\_20  
220118\_2per\_S  
2

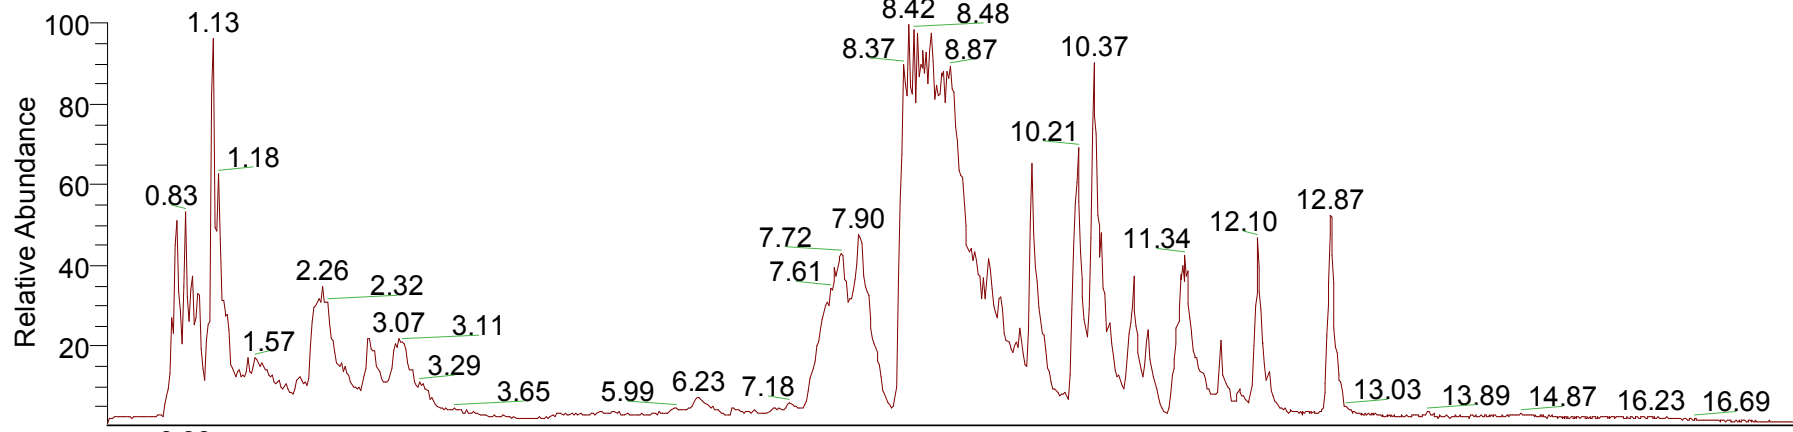

NL:  
7.83E9  
m/z=  
120.00-2000.00  
F: Full ms MS  
Hilic\_N\_Junti\_20  
220118\_2per\_S  
2

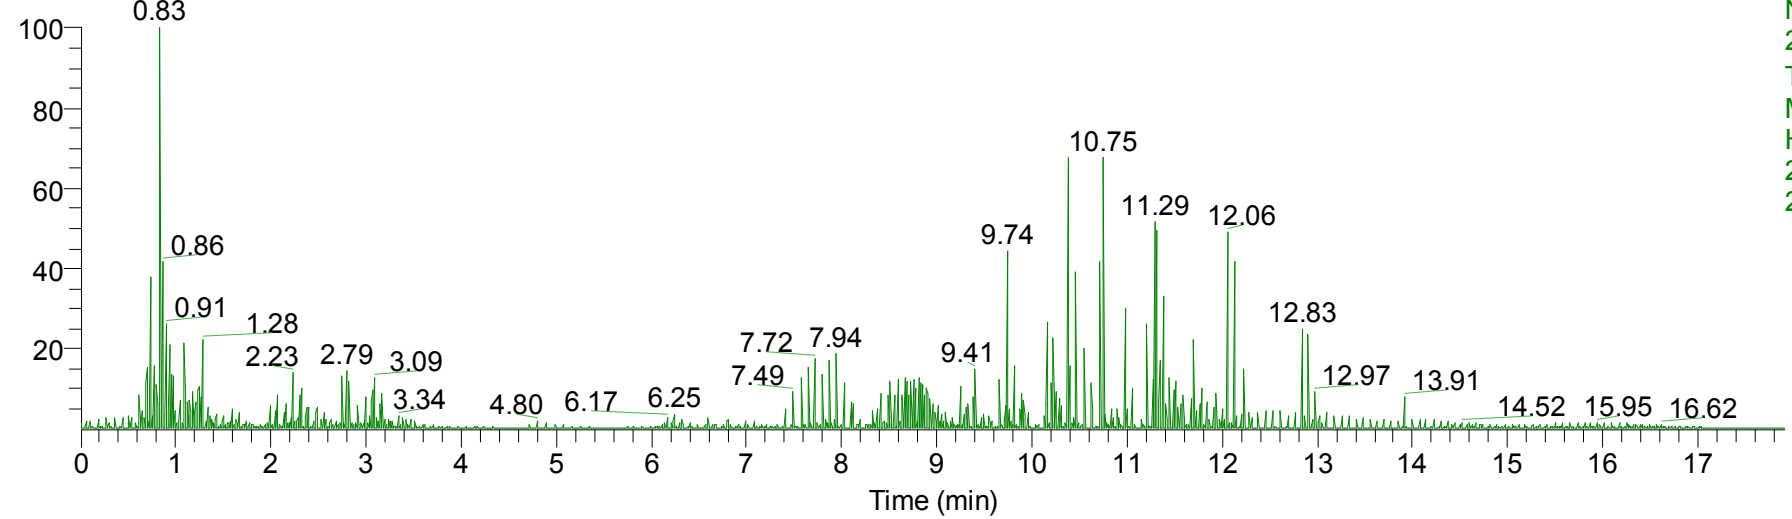

NL:  
2.16E9  
TIC F: Full ms2  
MS  
Hilic\_N\_Junti\_20  
220118\_2per\_S  
2



RT: 0.00 - 17.90

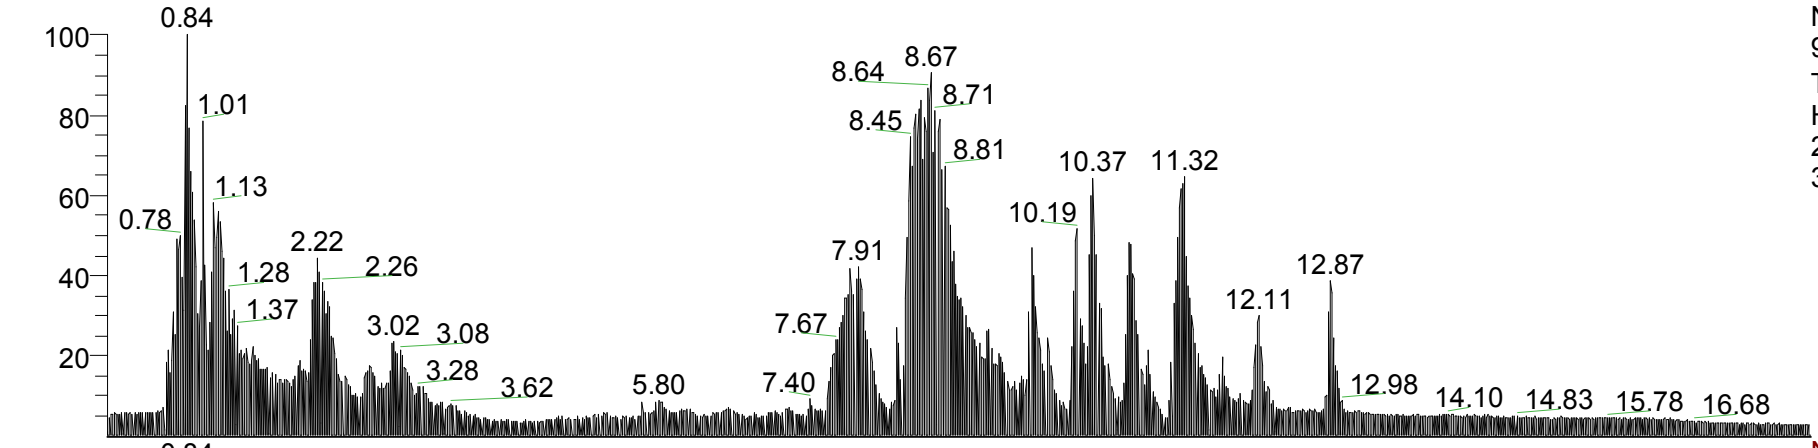

NL:  
9.11E9  
TIC MS  
Hilic\_N\_Junti\_20  
220118\_2per\_S  
3

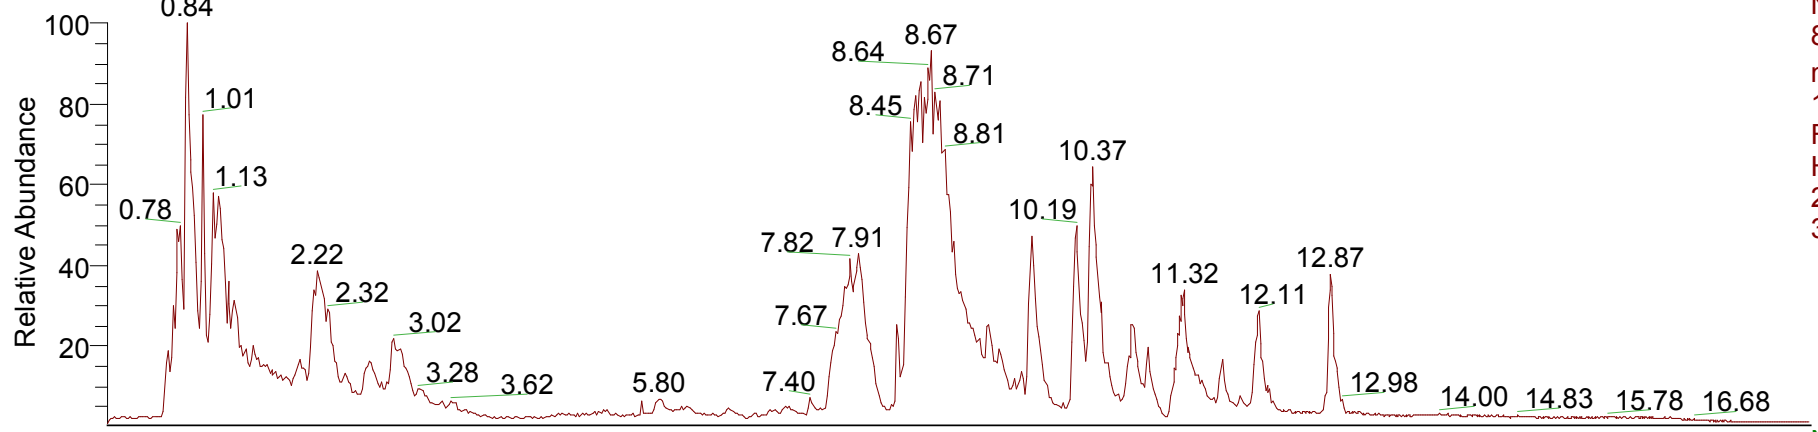

NL:  
8.54E9  
m/z=  
120.00-2000.00  
F: Full ms MS  
Hilic\_N\_Junti\_20  
220118\_2per\_S  
3

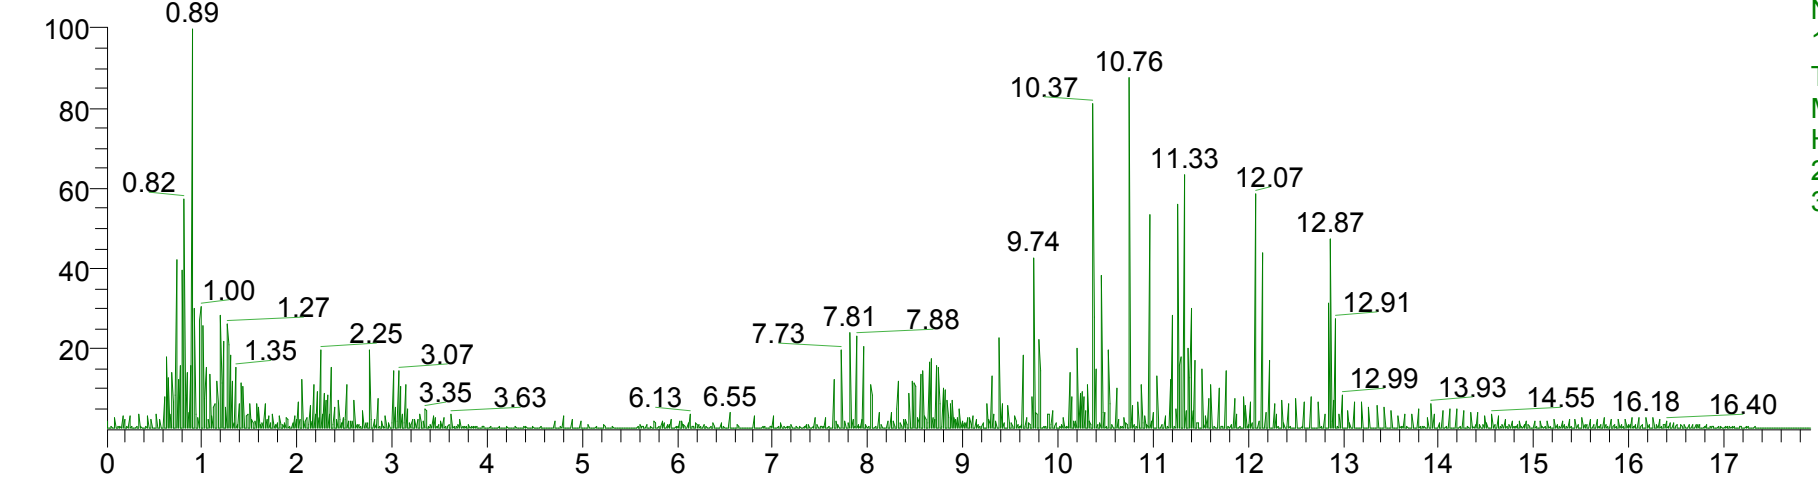

NL:  
1.56E9  
TIC F: Full ms2  
MS  
Hilic\_N\_Junti\_20  
220118\_2per\_S  
3

Time (min)

RT: 0.00 - 17.91

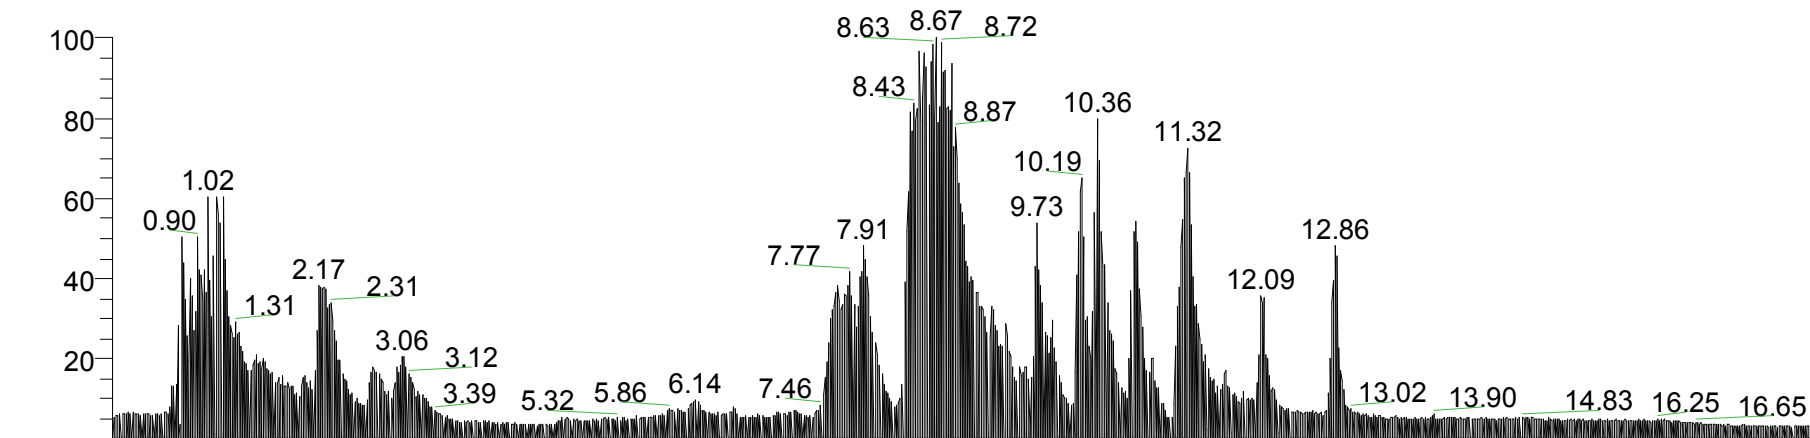

NL:  
8.32E9  
TIC MS  
Hilic\_N\_Junti\_20  
220118\_2per\_S  
4

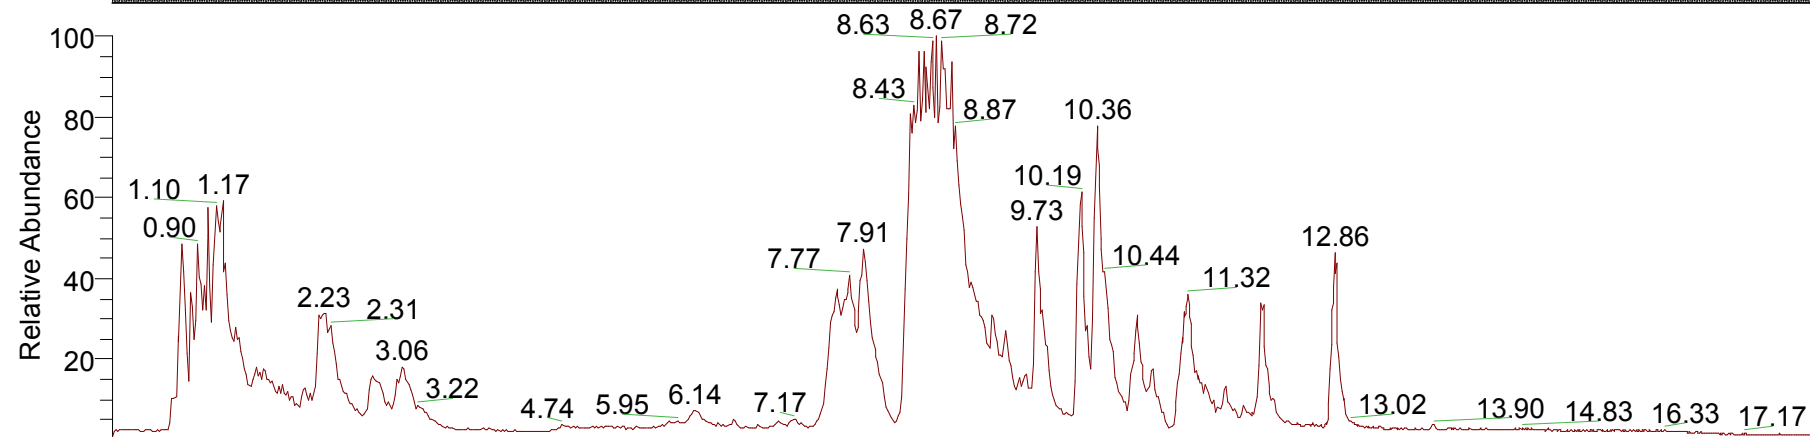

NL:  
8.00E9  
m/z=  
120.00-2000.00  
F: Full ms MS  
Hilic\_N\_Junti\_20  
220118\_2per\_S  
4

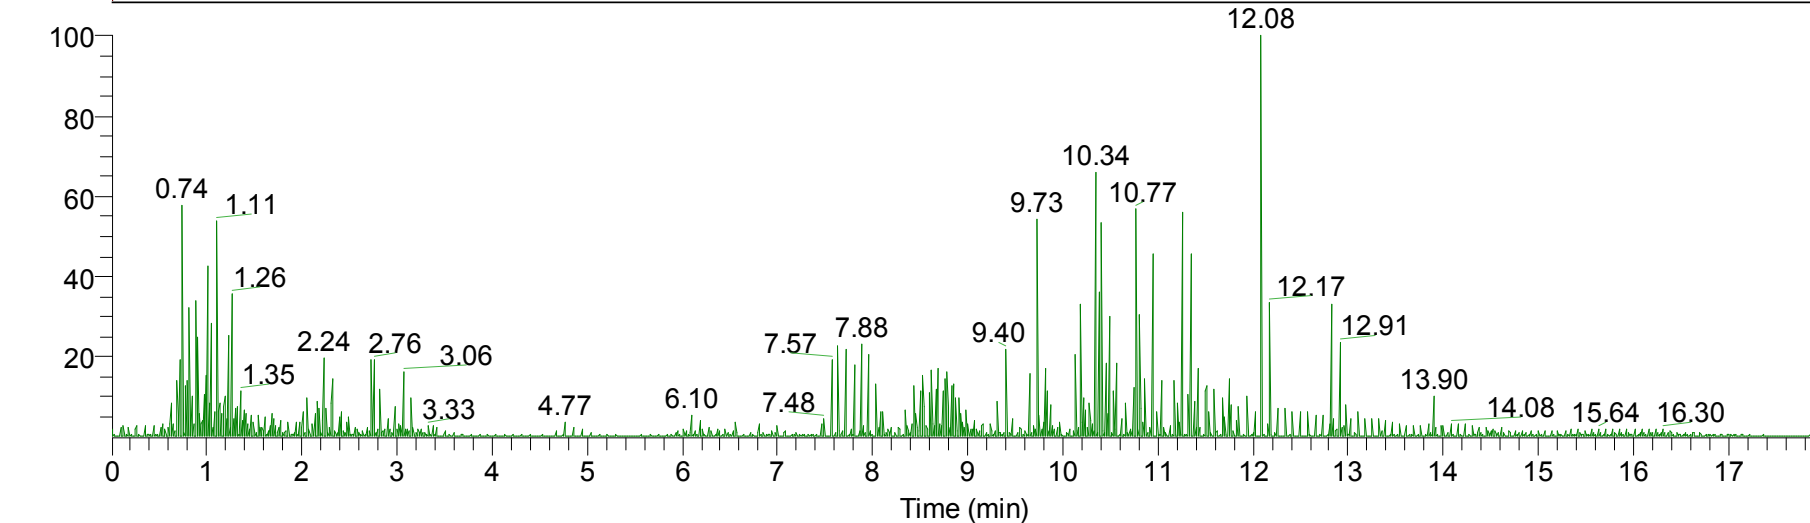

NL:  
1.64E9  
TIC F: Full ms2  
MS  
Hilic\_N\_Junti\_20  
220118\_2per\_S  
4

RT: 0.00 - 17.90

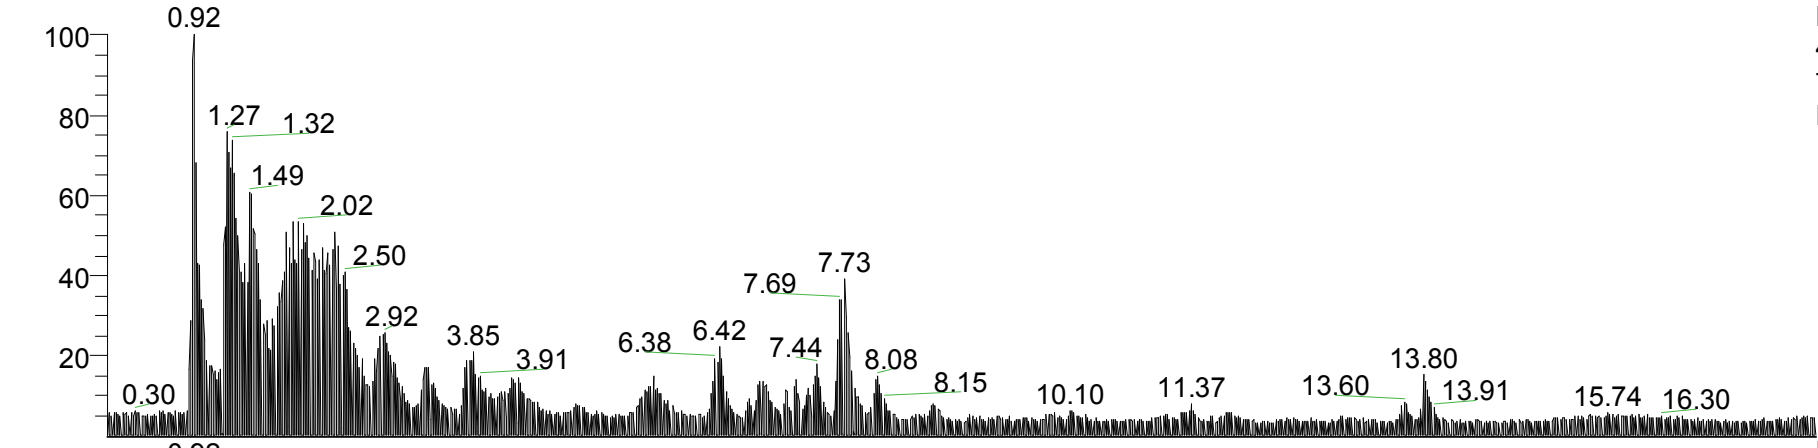

NL:  
4.35E9  
TIC MS  
Hilic\_P\_202201  
18\_2per\_1\_50\_  
1

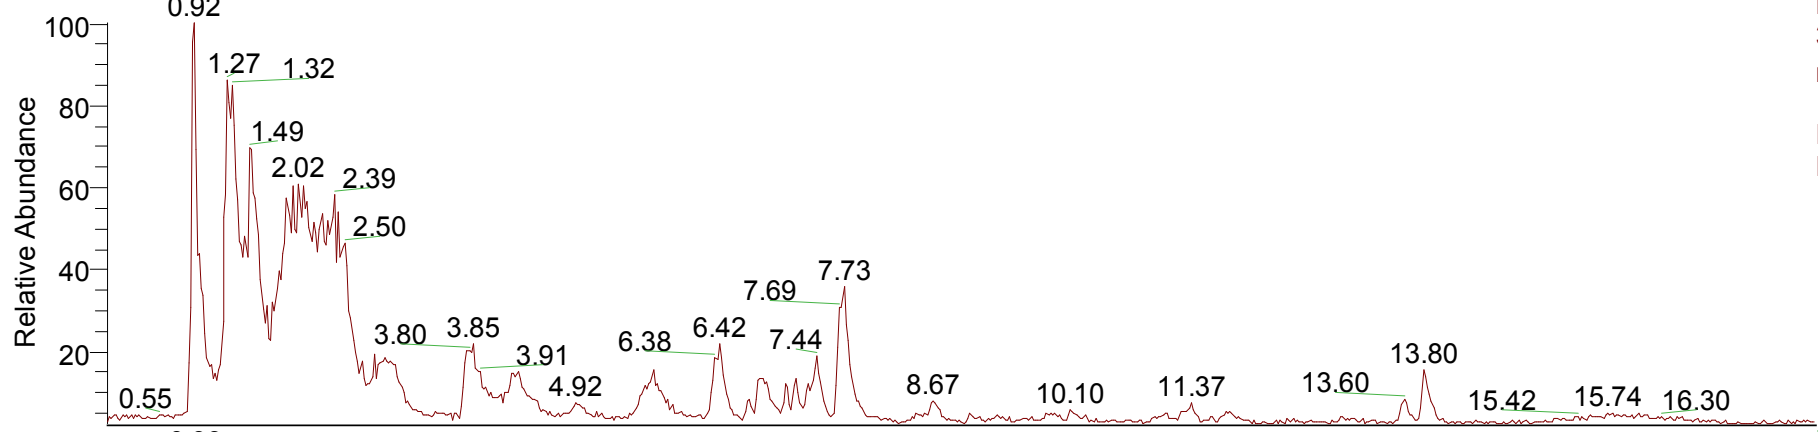

NL:  
3.59E9  
m/z=  
120.00-2000.00  
F: Full ms MS  
Hilic\_P\_202201  
18\_2per\_1\_50\_  
1

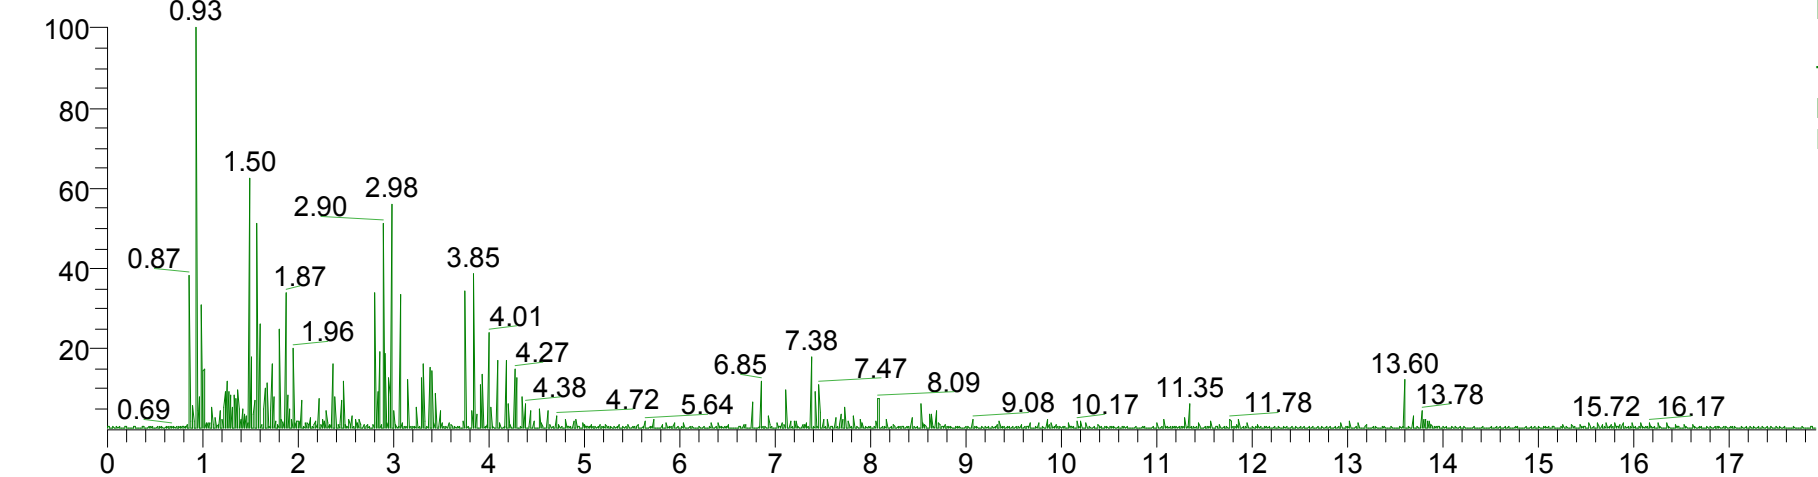

NL:  
1.16E9  
TIC F: Full ms2  
MS  
Hilic\_P\_202201  
18\_2per\_1\_50\_  
1

Time (min)

RT: 0.00 - 17.91

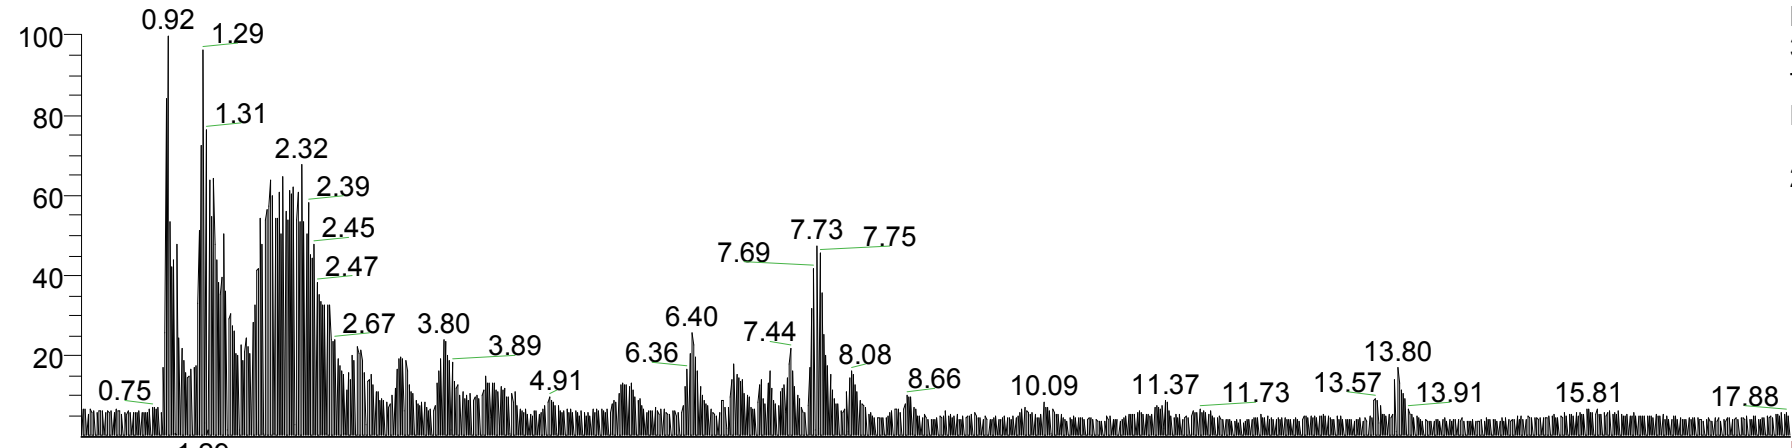

NL:  
3.86E9  
TIC MS  
Hilic\_P\_202201  
18\_2per\_1\_50\_  
2

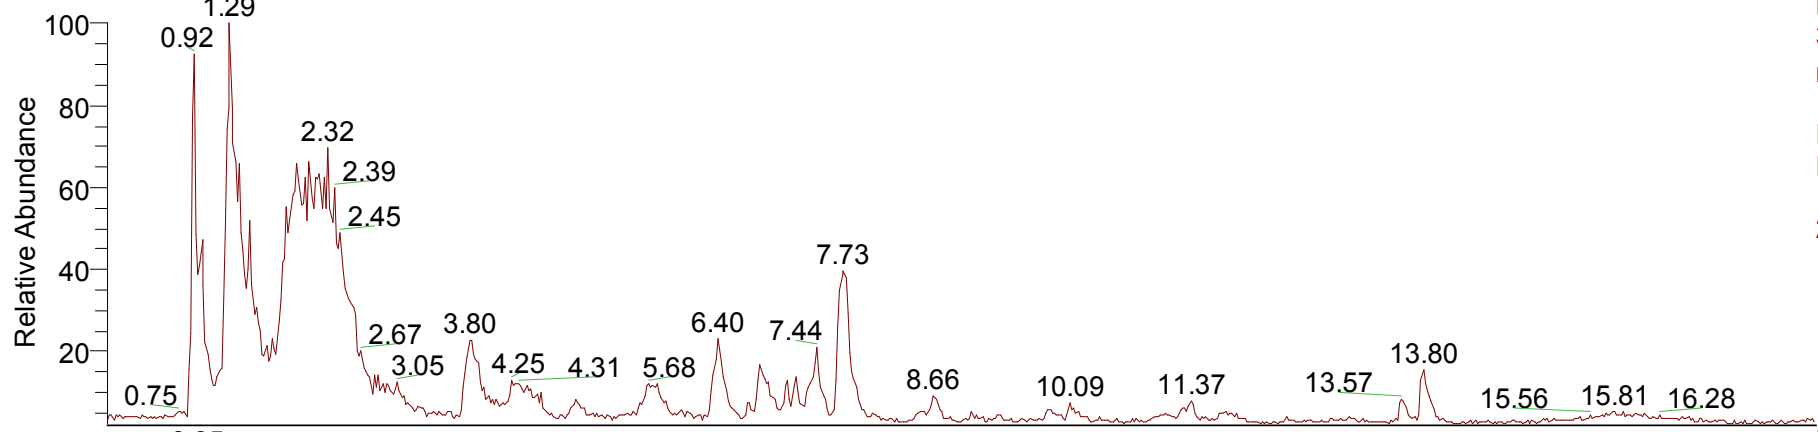

NL:  
3.53E9  
m/z=  
120.00-2000.00  
F: Full ms MS  
Hilic\_P\_202201  
18\_2per\_1\_50\_  
2

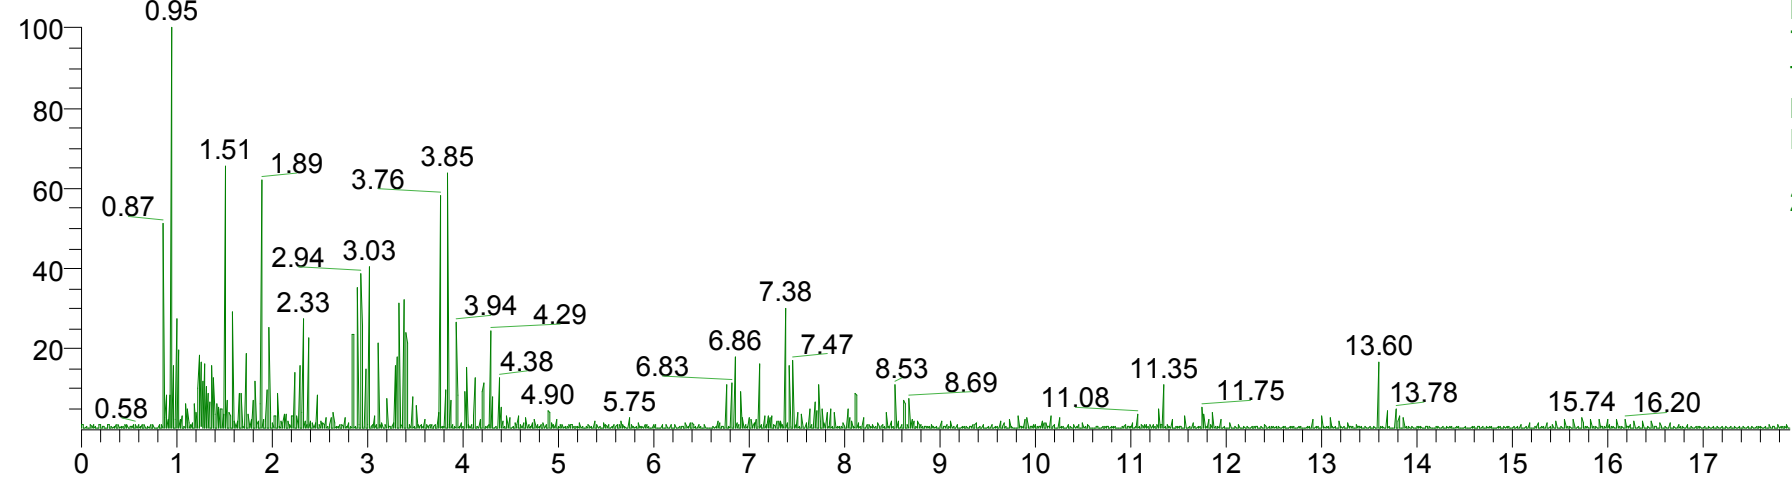

NL:  
7.32E8  
TIC F: Full ms2  
MS  
Hilic\_P\_202201  
18\_2per\_1\_50\_  
2

Time (min)

RT: 0.00 - 17.90

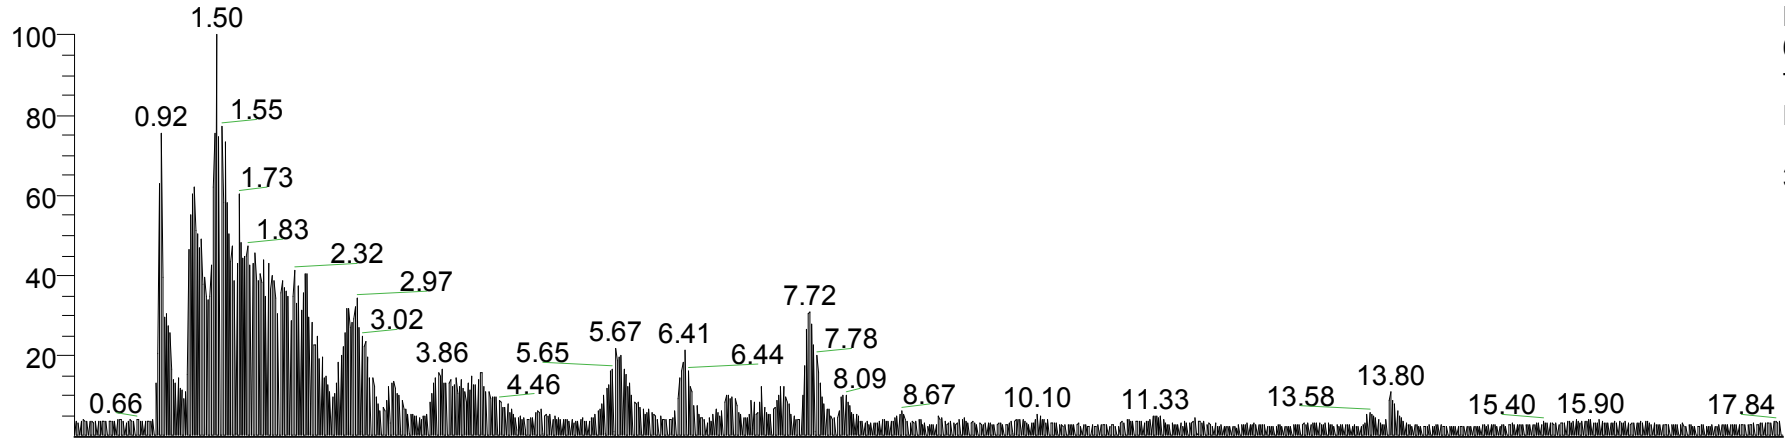

NL:  
6.22E9  
TIC MS  
Hilic\_P\_202201  
18\_2per\_1\_50\_  
3

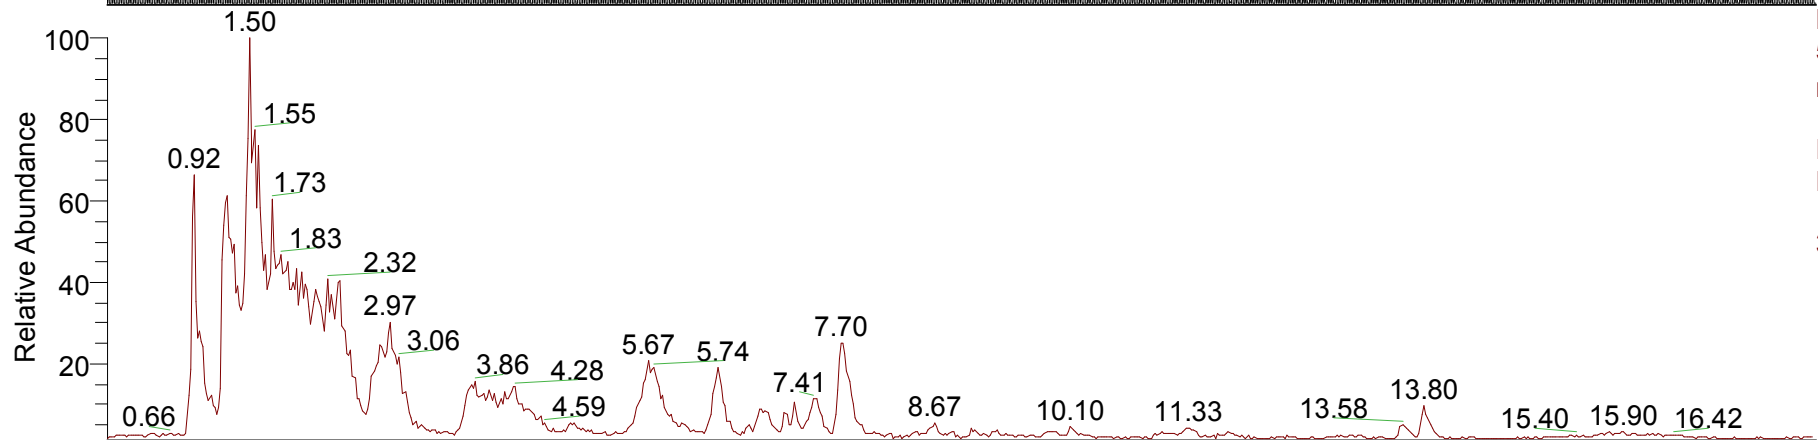

NL:  
5.94E9  
m/z=  
120.00-2000.00  
F: Full ms MS  
Hilic\_P\_202201  
18\_2per\_1\_50\_  
3

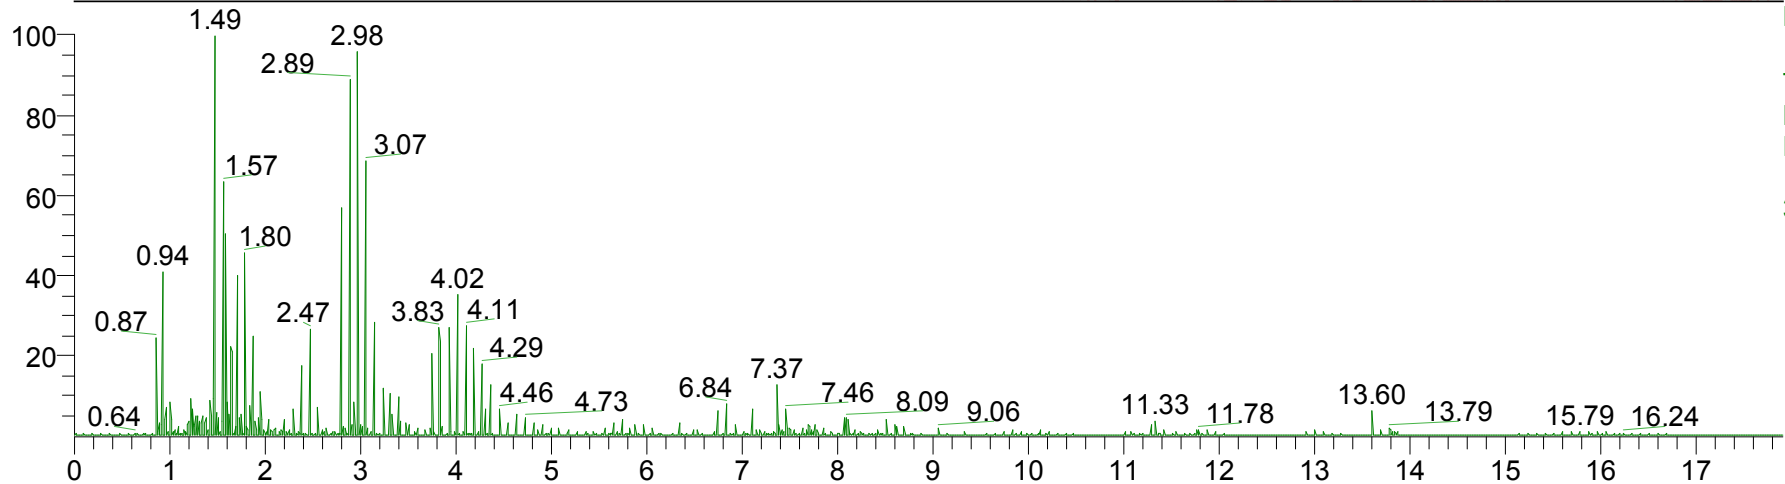

NL:  
1.90E9  
TIC F: Full ms2  
MS  
Hilic\_P\_202201  
18\_2per\_1\_50\_  
3

Time (min)

RT: 0.00 - 17.90

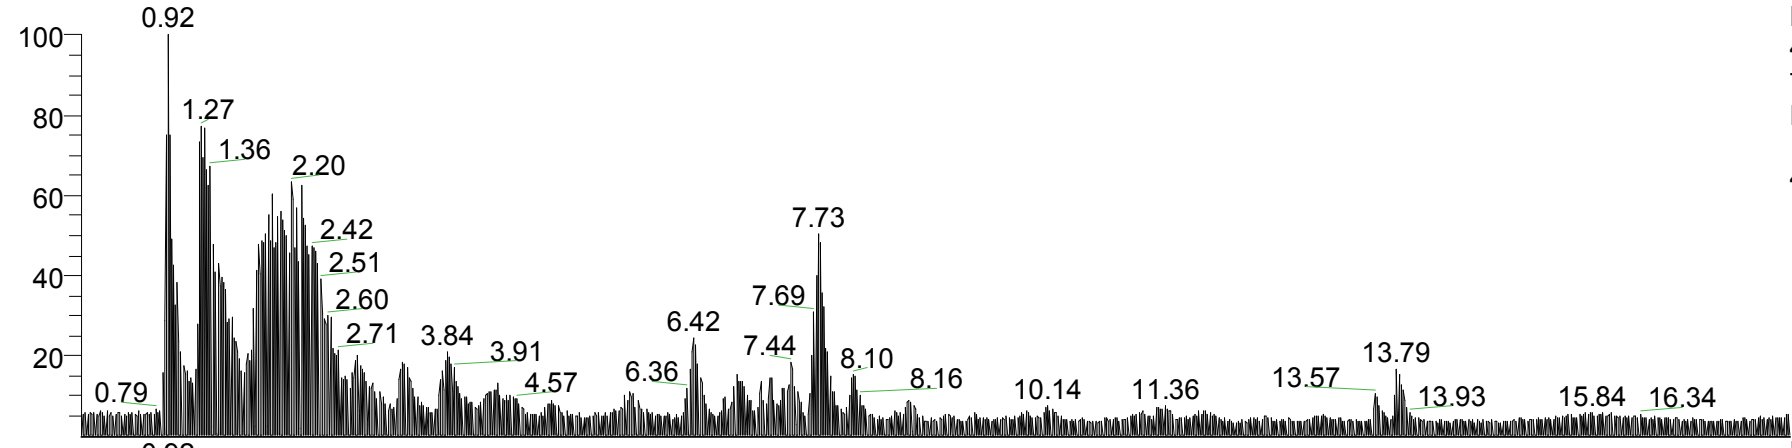

NL:  
4.28E9  
TIC MS  
Hilic\_P\_202201  
18\_2per\_1\_50\_  
4

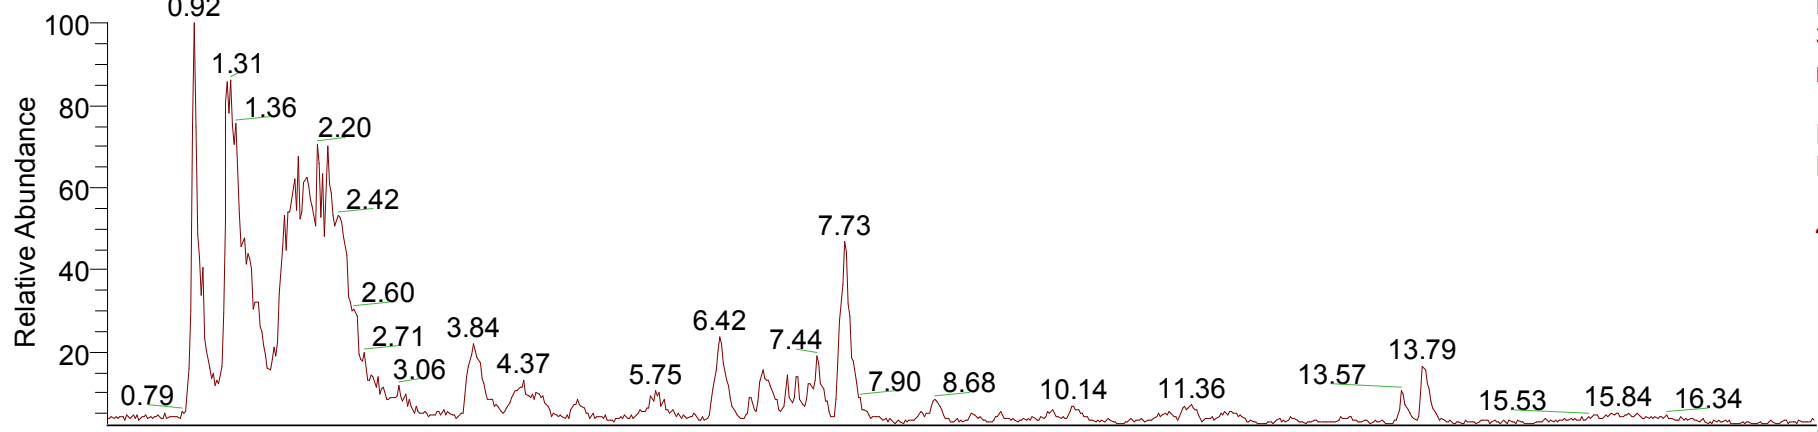

NL:  
3.60E9  
m/z=  
120.00-2000.00  
F: Full ms MS  
Hilic\_P\_202201  
18\_2per\_1\_50\_  
4

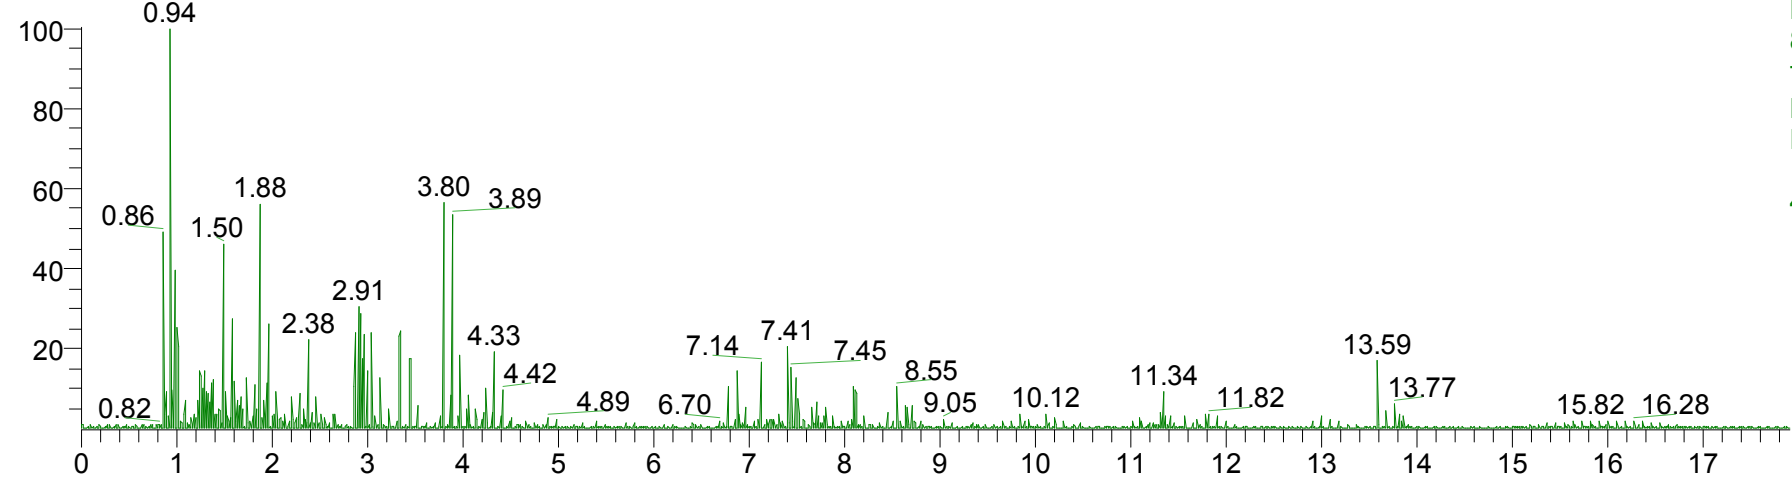

NL:  
8.76E8  
TIC F: Full ms2  
MS  
Hilic\_P\_202201  
18\_2per\_1\_50\_  
4

RT: 0.00 - 17.90

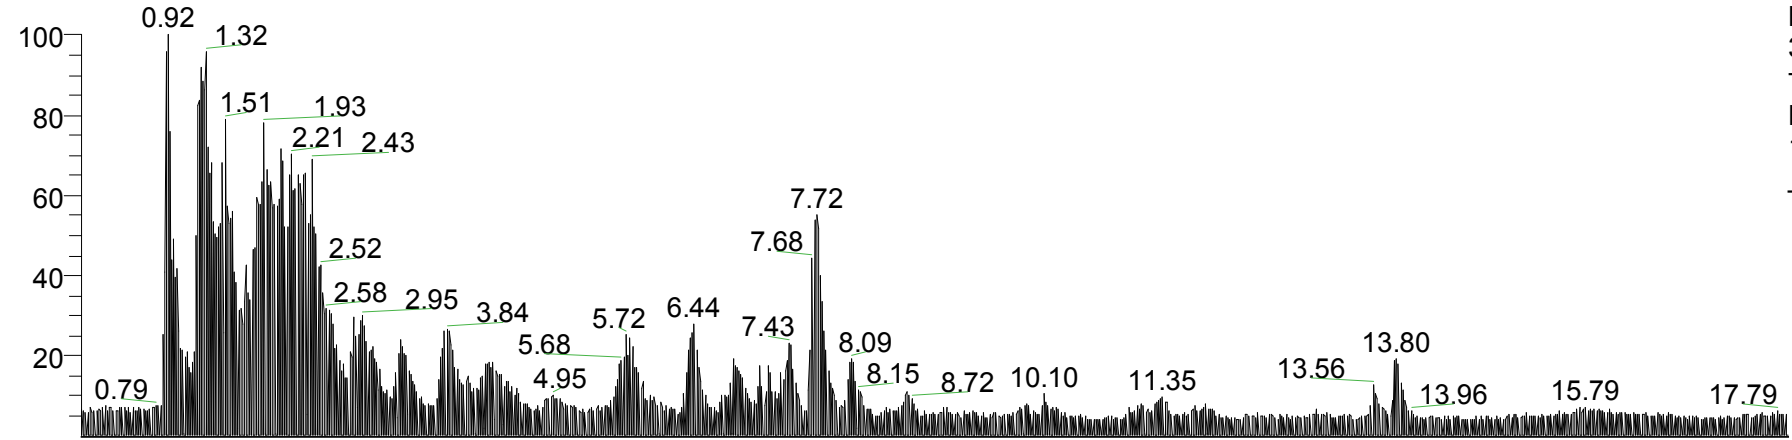

NL:  
3.59E9  
TIC MS  
Hilic\_P\_202201  
18\_2per\_1\_500  
\_1

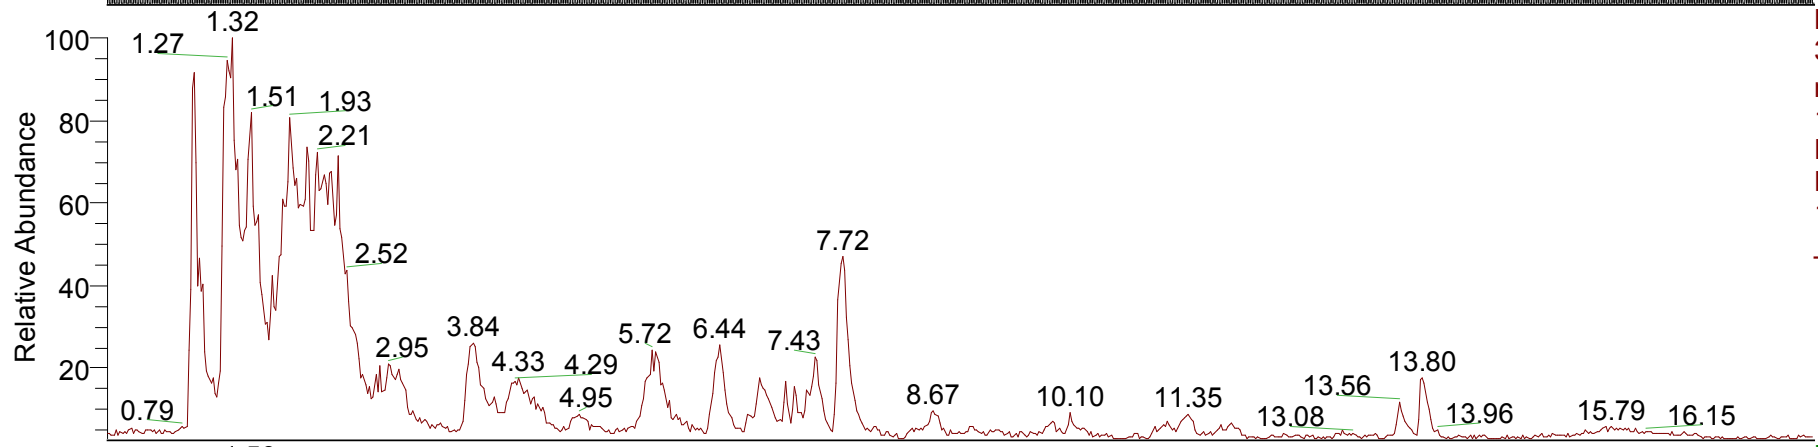

NL:  
3.28E9  
m/z=  
120.00-2000.00  
F: Full ms MS  
Hilic\_P\_202201  
18\_2per\_1\_500  
\_1

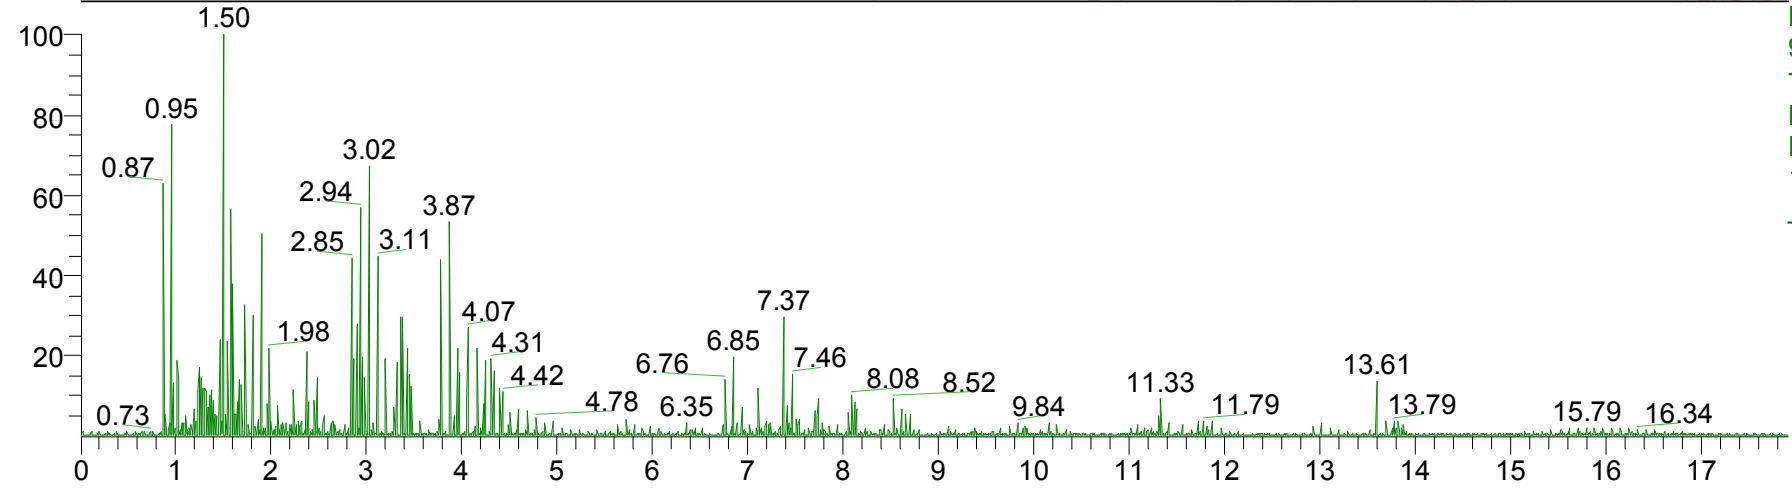

NL:  
9.20E8  
TIC F: Full ms2  
MS  
Hilic\_P\_202201  
18\_2per\_1\_500  
\_1

Time (min)

RT: 0.00 - 17.90

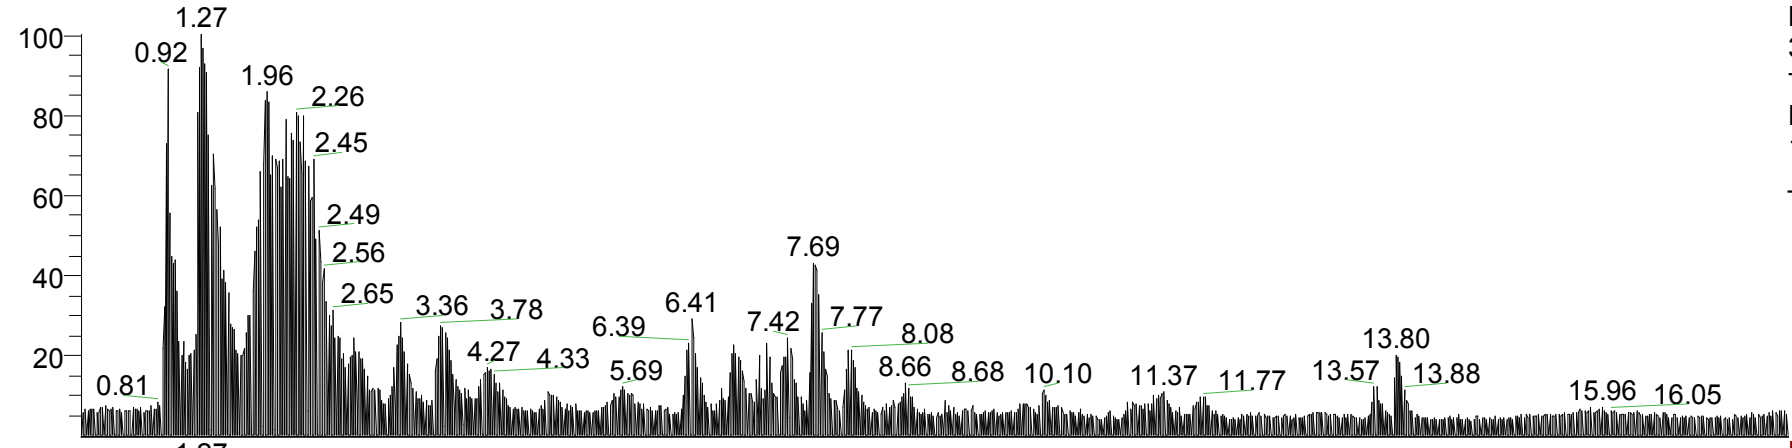

NL:  
3.60E9  
TIC MS  
Hilic\_P\_202201  
18\_2per\_1\_500  
\_2

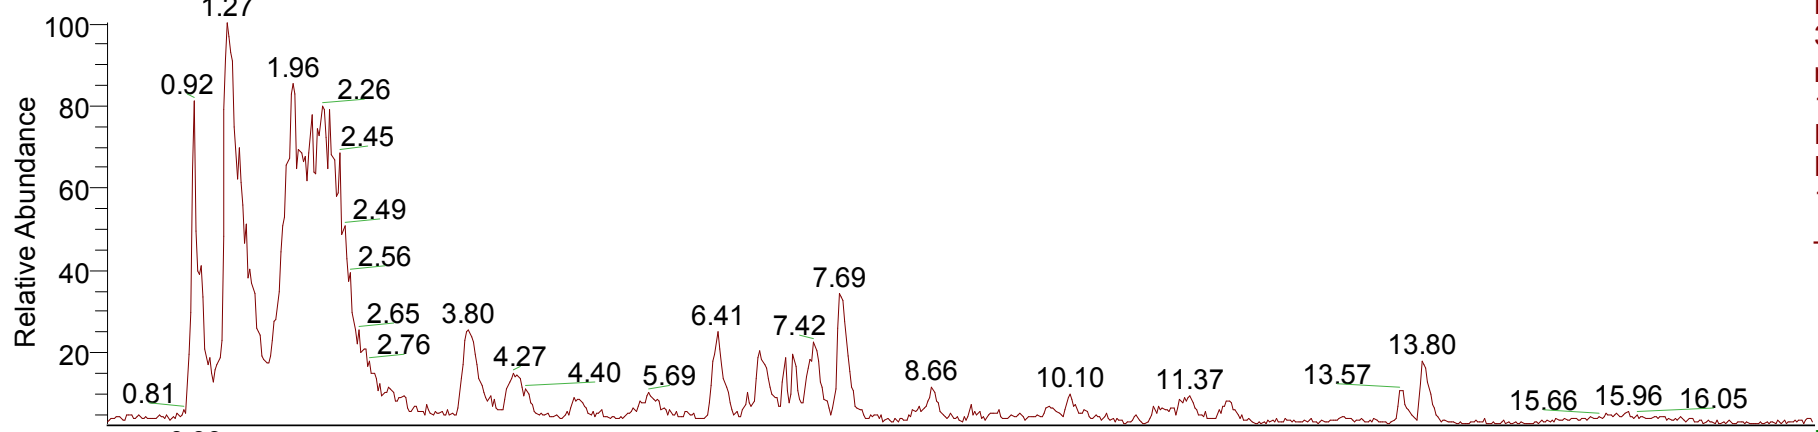

NL:  
3.44E9  
m/z=  
120.00-2000.00  
F: Full ms MS  
Hilic\_P\_202201  
18\_2per\_1\_500  
\_2

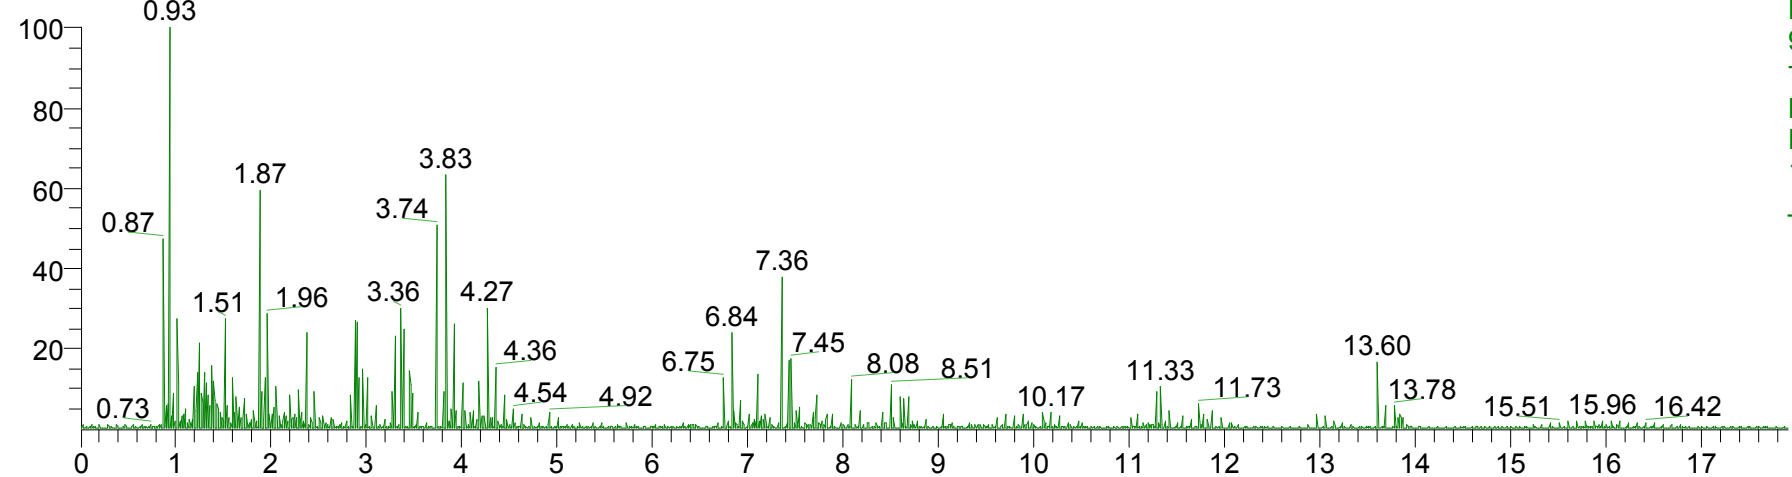

NL:  
9.47E8  
TIC F: Full ms2  
MS  
Hilic\_P\_202201  
18\_2per\_1\_500  
\_2

Time (min)



RT: 0.00 - 17.90

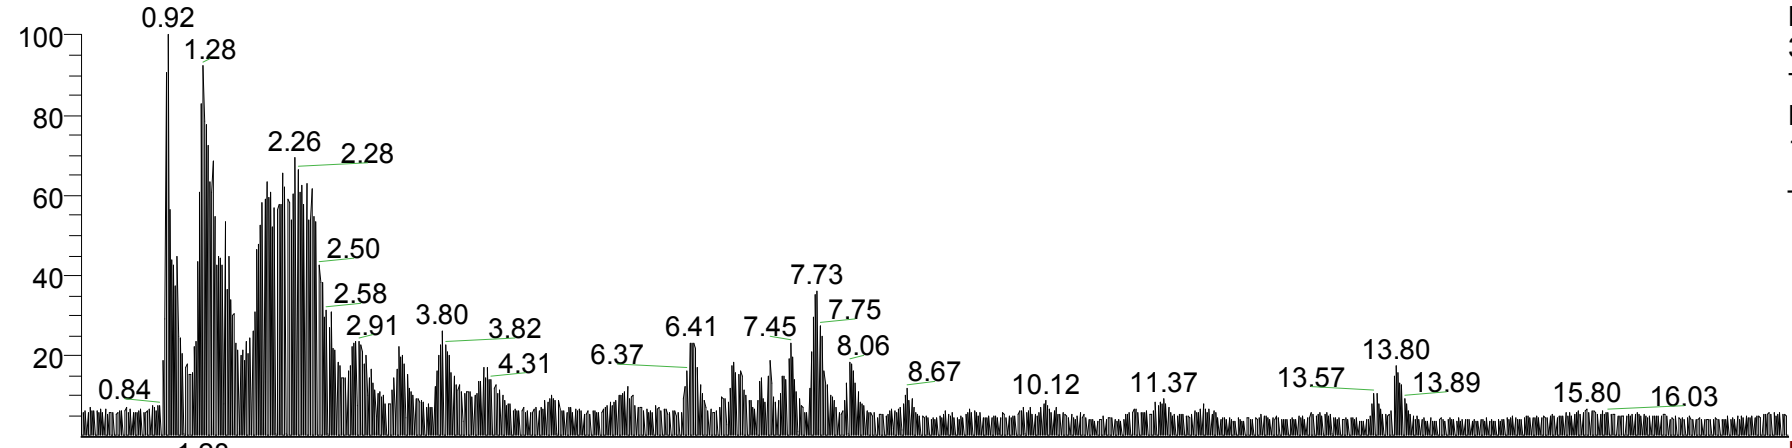

NL:  
3.83E9  
TIC MS  
Hilic\_P\_202201  
18\_2per\_1\_500  
\_3

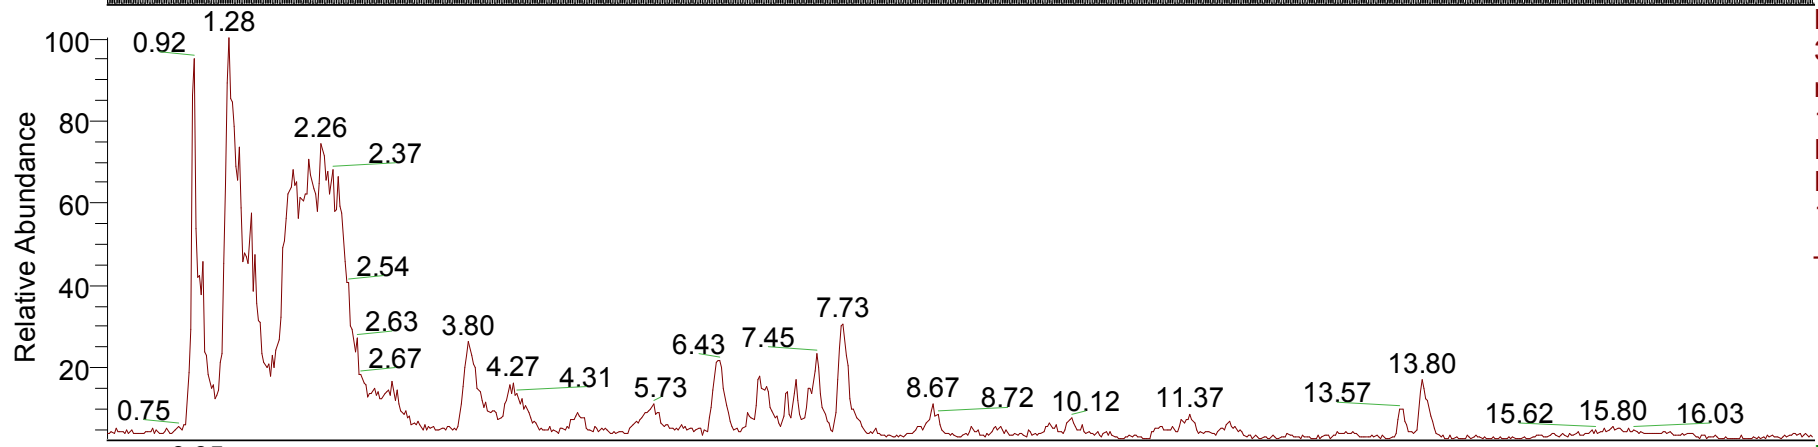

NL:  
3.36E9  
m/z=  
120.00-2000.00  
F: Full ms MS  
Hilic\_P\_202201  
18\_2per\_1\_500  
\_3

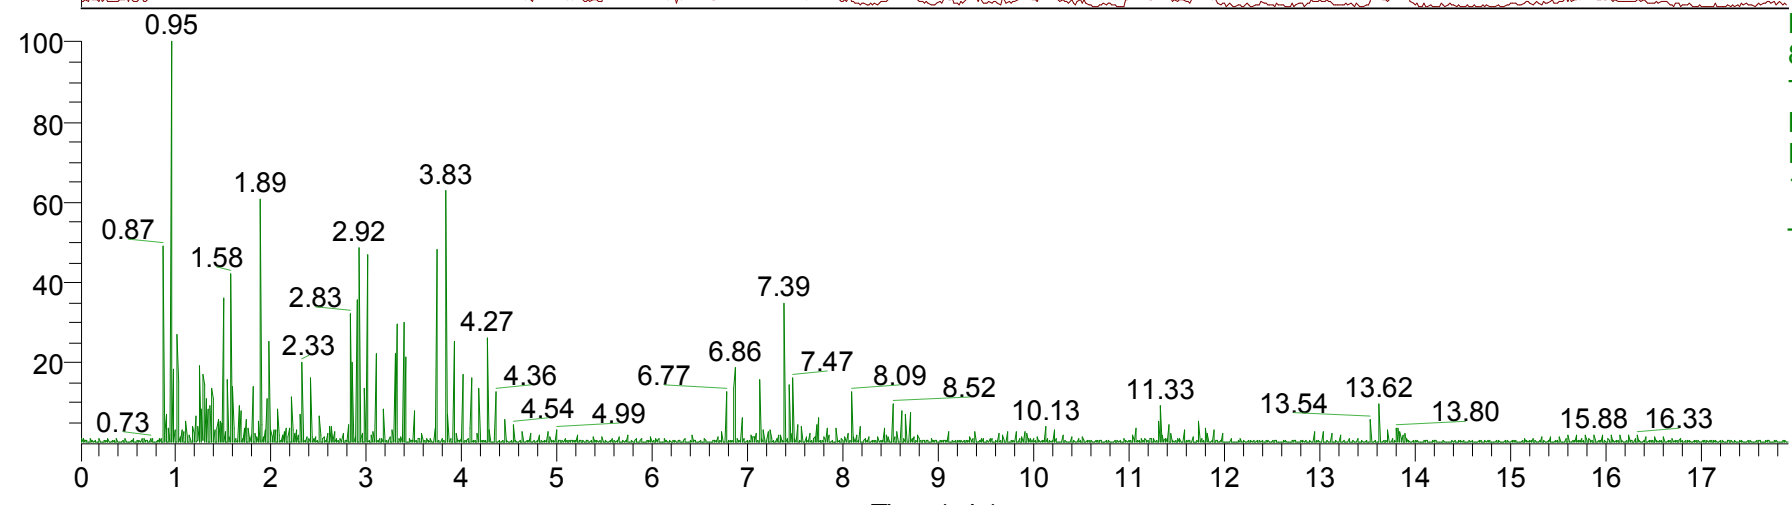

NL:  
8.31E8  
TIC F: Full ms2  
MS  
Hilic\_P\_202201  
18\_2per\_1\_500  
\_3

RT: 0.00 - 17.90

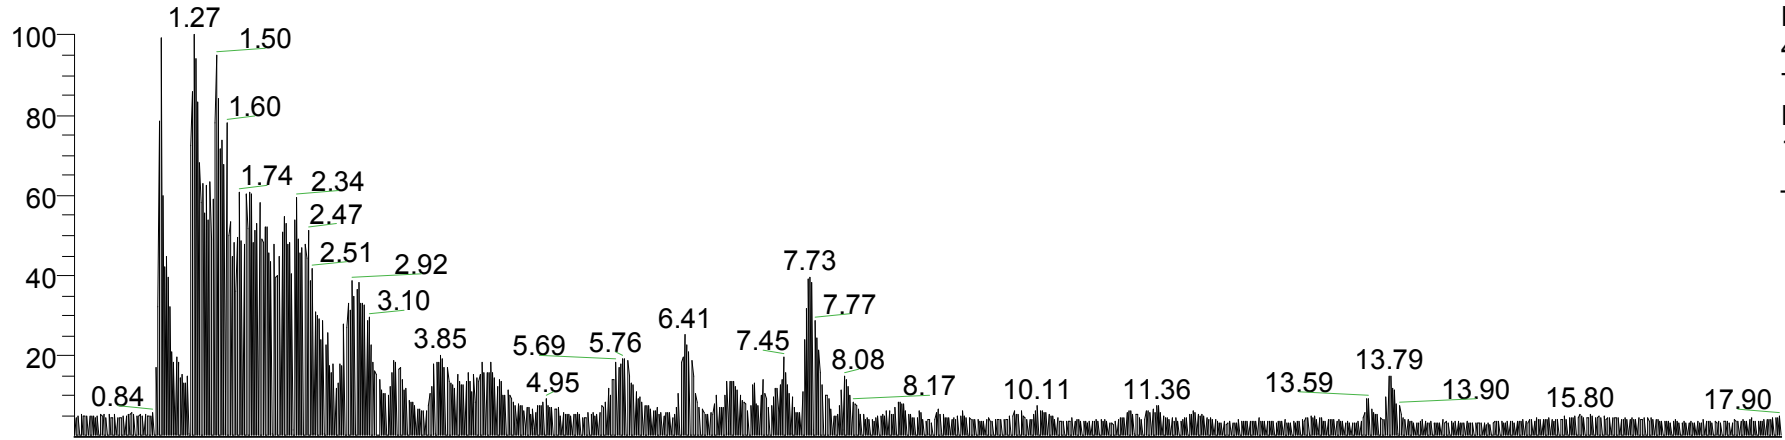

NL:  
4.66E9  
TIC MS  
Hilic\_P\_202201  
18\_2per\_1\_500  
\_4

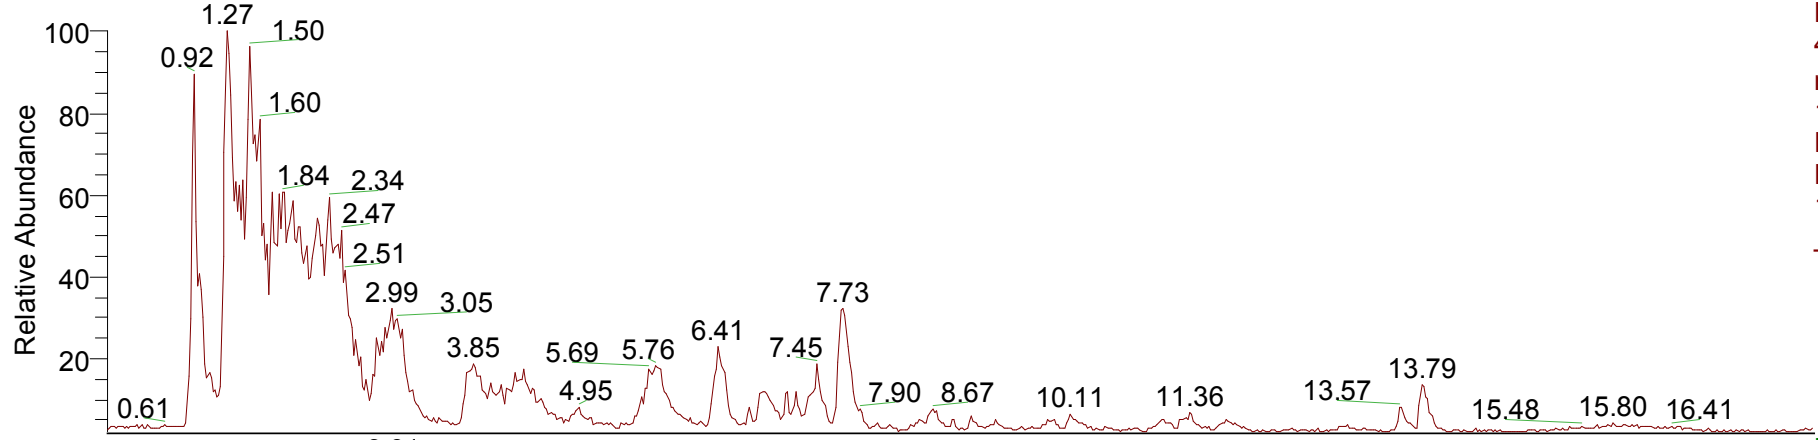

NL:  
4.40E9  
m/z=  
120.00-2000.00  
F: Full ms MS  
Hilic\_P\_202201  
18\_2per\_1\_500  
\_4

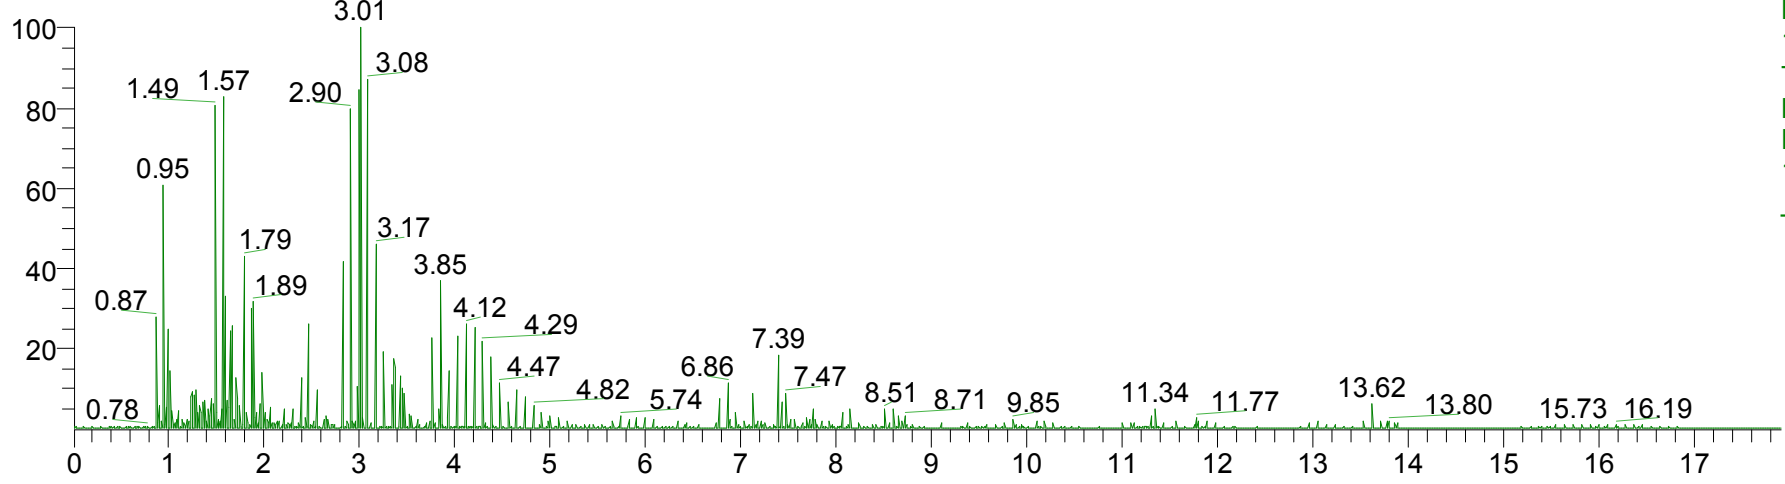

NL:  
1.53E9  
TIC F: Full ms2  
MS  
Hilic\_P\_202201  
18\_2per\_1\_500  
\_4

Time (min)

RT: 0.00 - 17.91

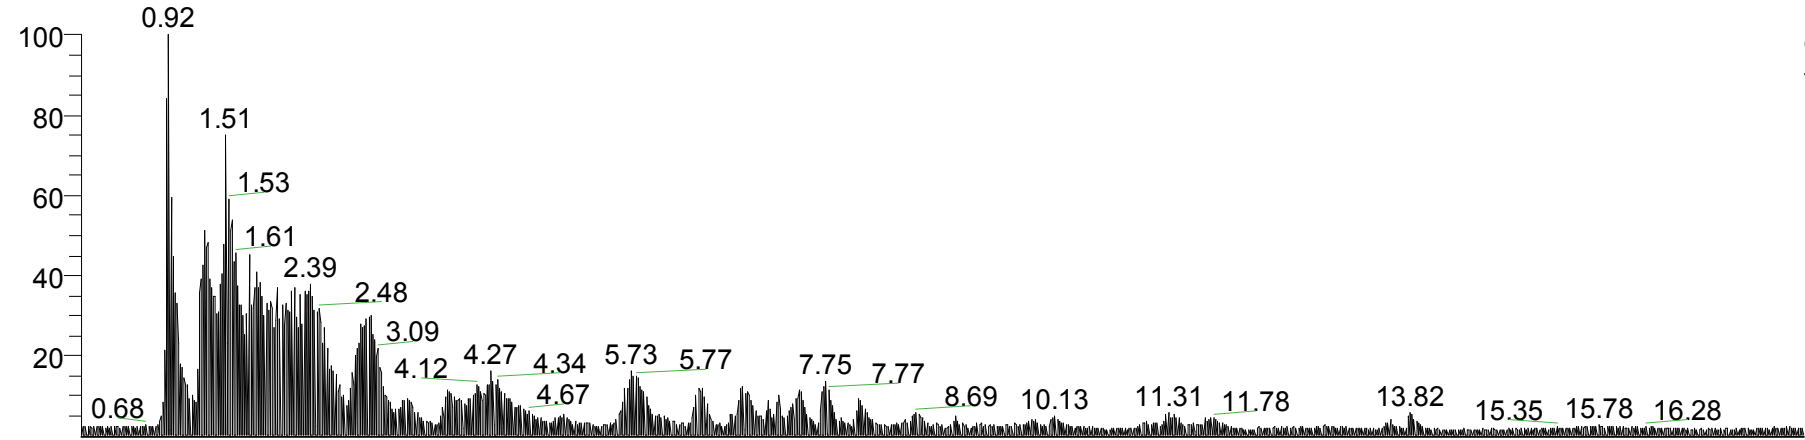

NL:  
9.89E9  
TIC MS  
Hilic\_P\_20220  
118\_2per\_M1

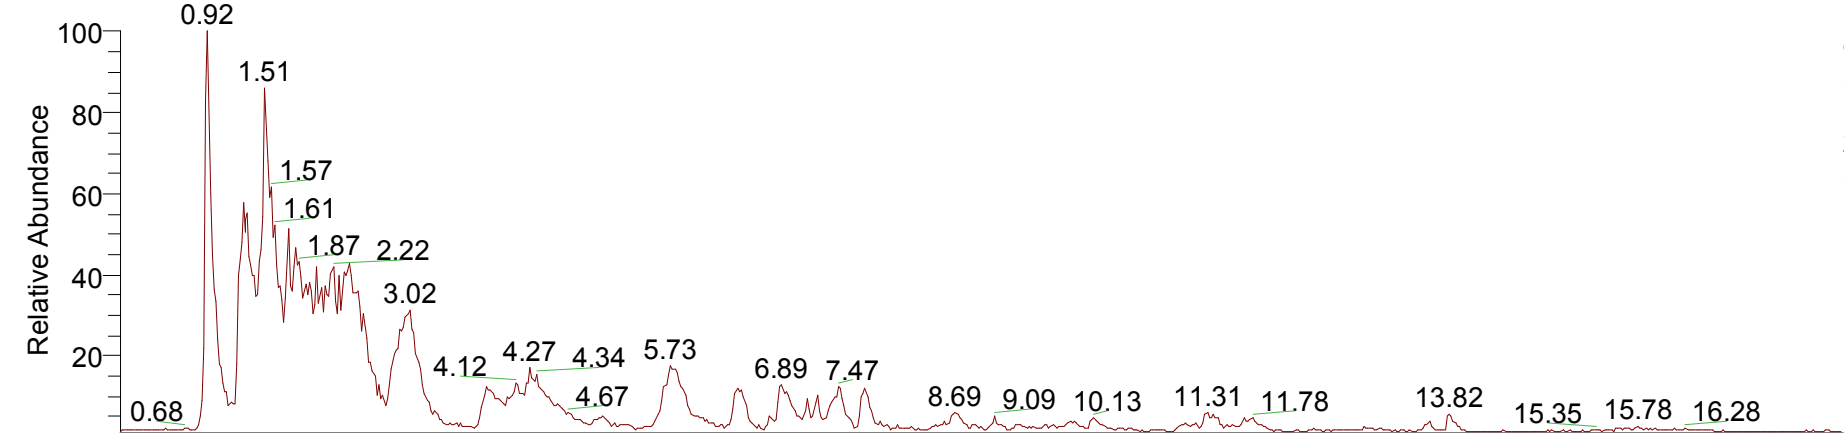

NL:  
8.33E9  
m/z=  
120.00-  
2000.00 F: Full  
ms MS  
Hilic\_P\_20220  
118\_2per\_M1

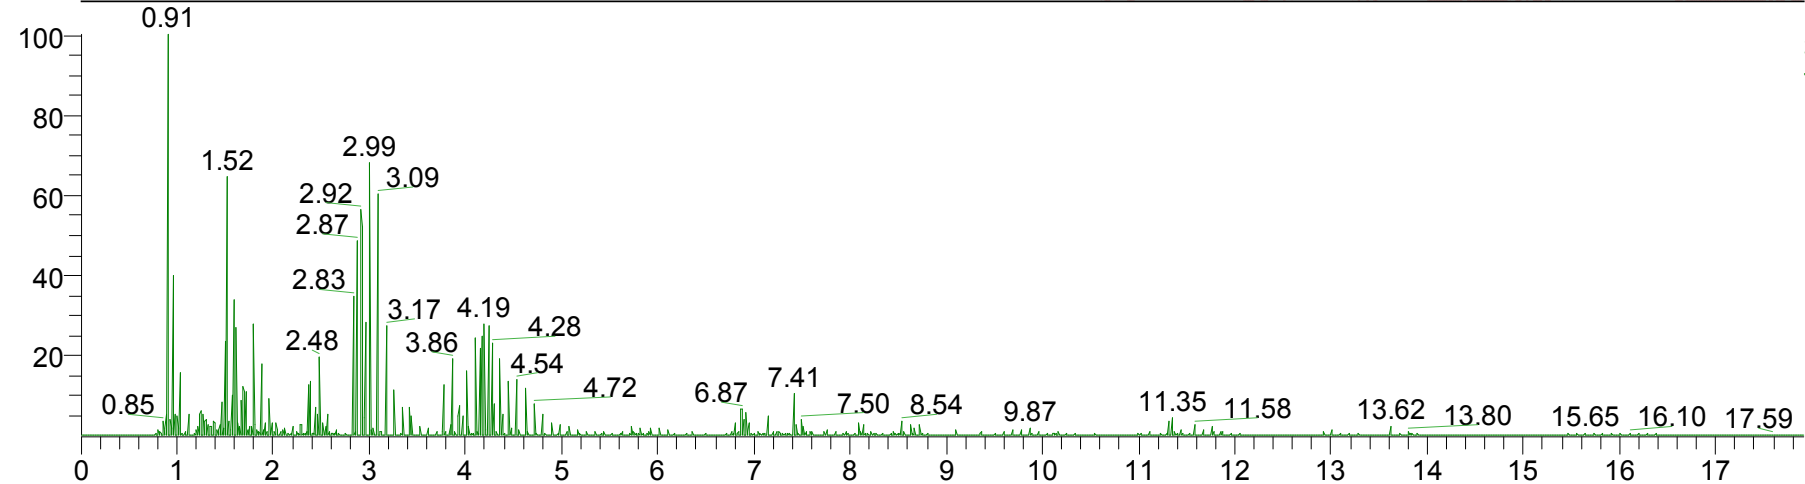

NL:  
3.57E9  
TIC F: Full ms2  
MS  
Hilic\_P\_20220  
118\_2per\_M1

Time (min)

RT: 0.00 - 17.90

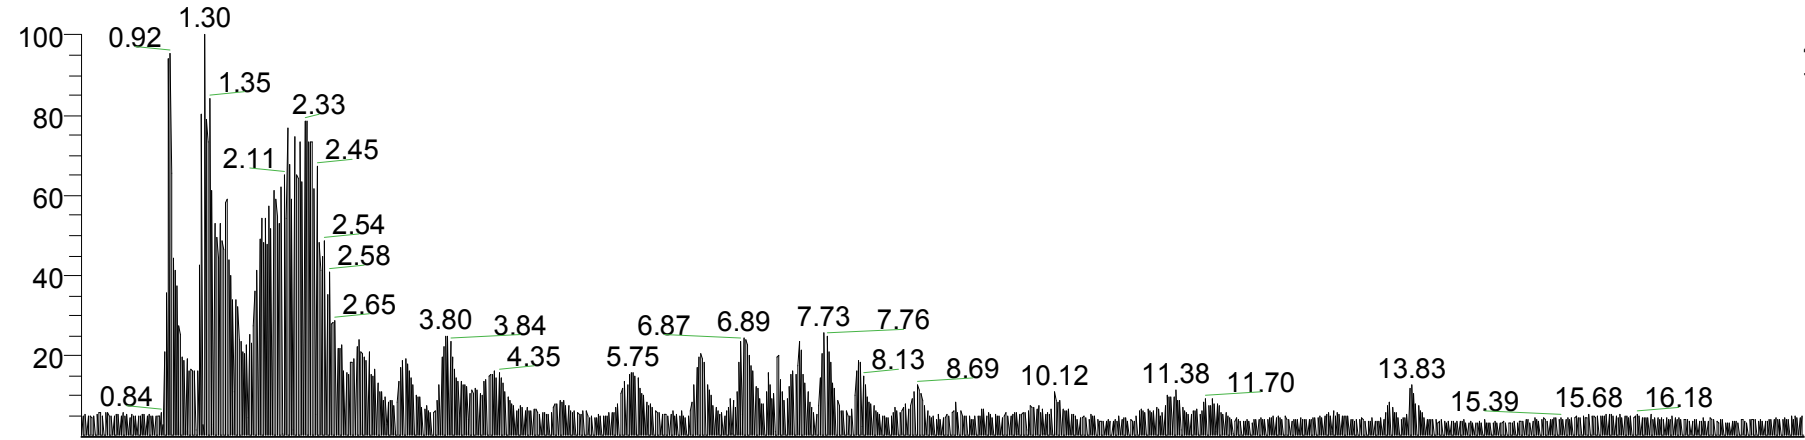

NL:  
4.48E9  
TIC MS  
Hilic\_P\_20220  
118\_2per\_M2

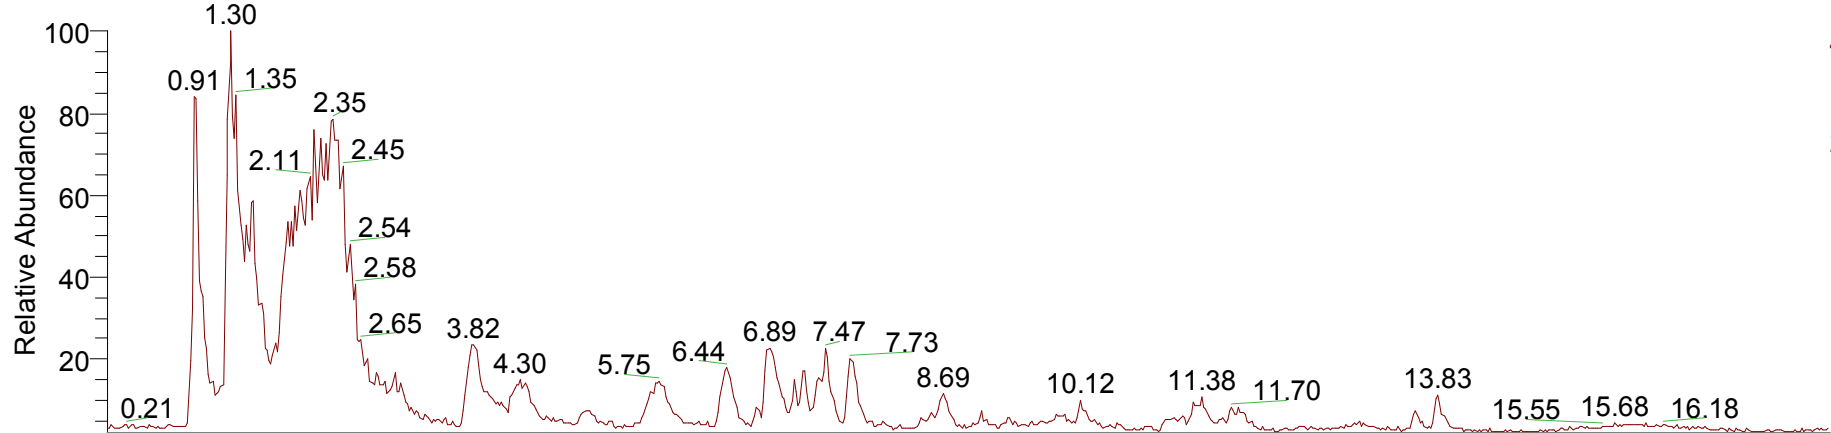

NL:  
4.27E9  
m/z=  
120.00-  
2000.00 F: Full  
ms MS  
Hilic\_P\_20220  
118\_2per\_M2

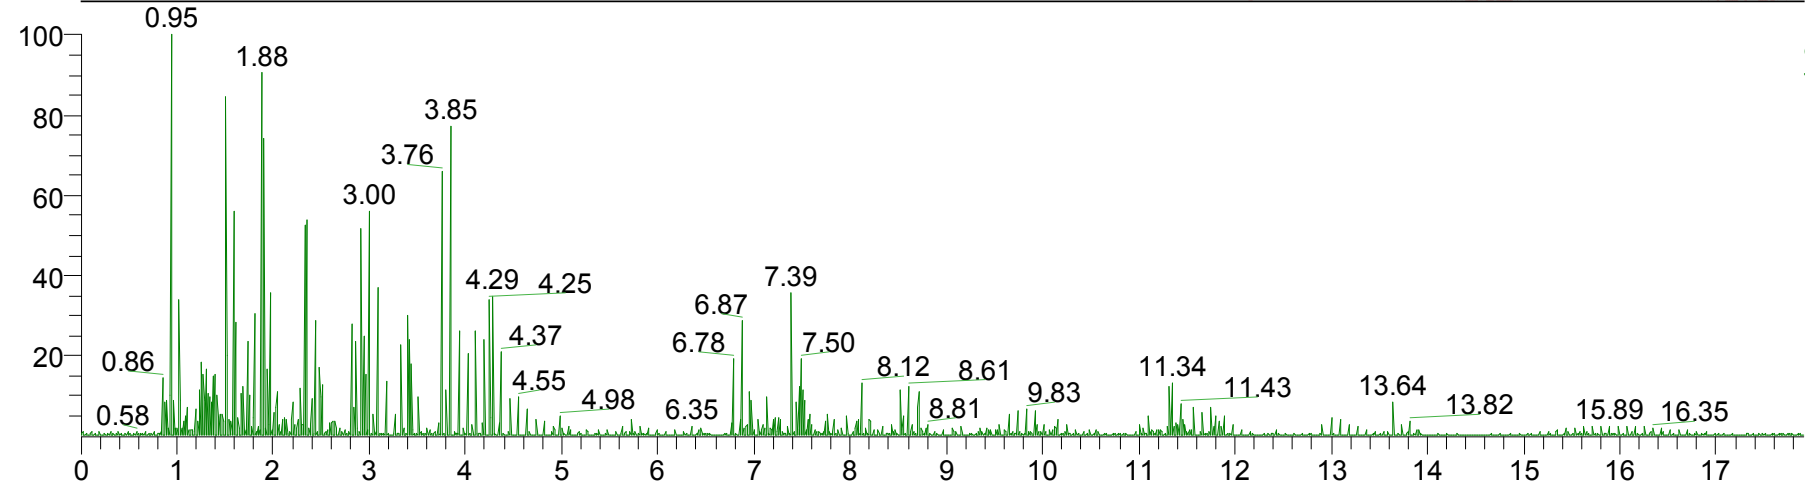

NL:  
8.61E8  
TIC F: Full ms2  
MS  
Hilic\_P\_20220  
118\_2per\_M2

Time (min)

RT: 0.00 - 17.90

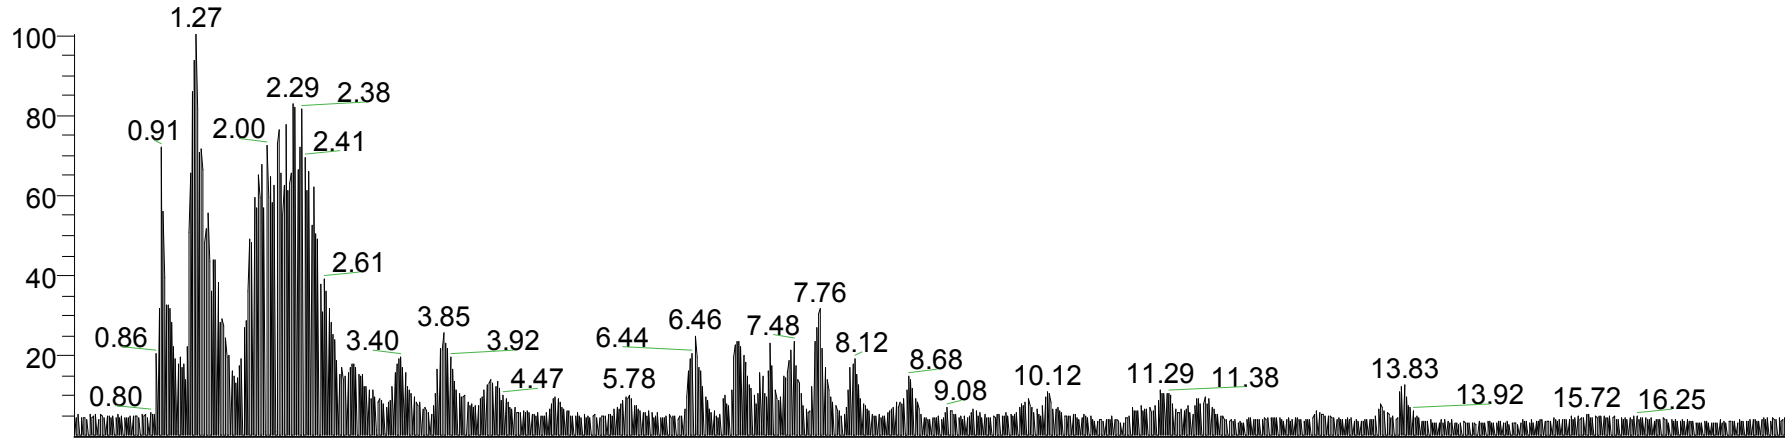

NL:  
4.81E9  
TIC MS  
Hilic\_P\_20220  
118\_2per\_M3

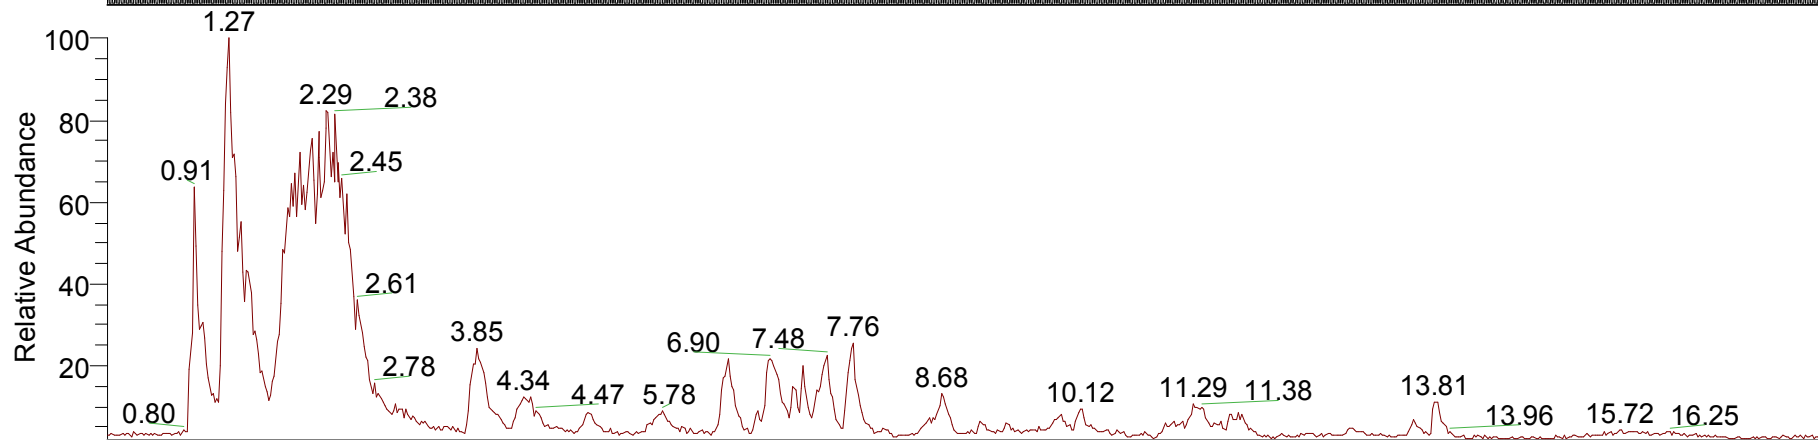

NL:  
4.60E9  
m/z=  
120.00-  
2000.00 F: Full  
ms MS  
Hilic\_P\_20220  
118\_2per\_M3

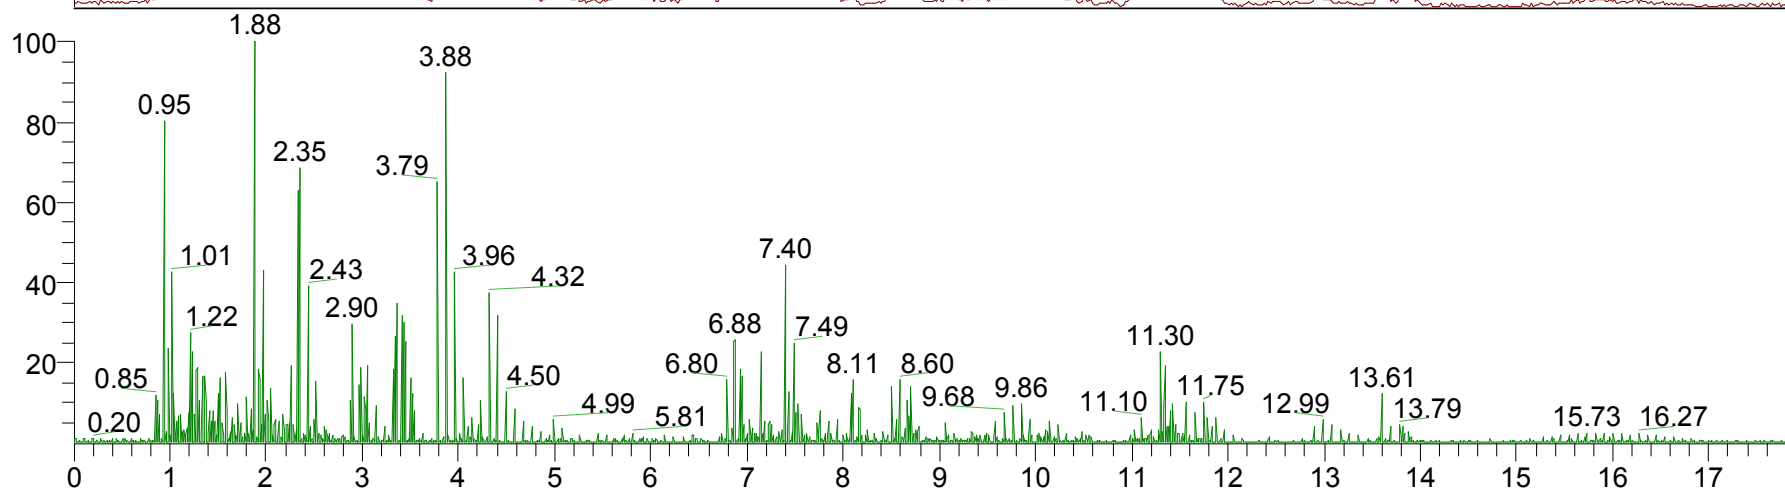

NL:  
8.06E8  
TIC F: Full ms2  
MS  
Hilic\_P\_20220  
118\_2per\_M3

Time (min)

RT: 0.00 - 17.90

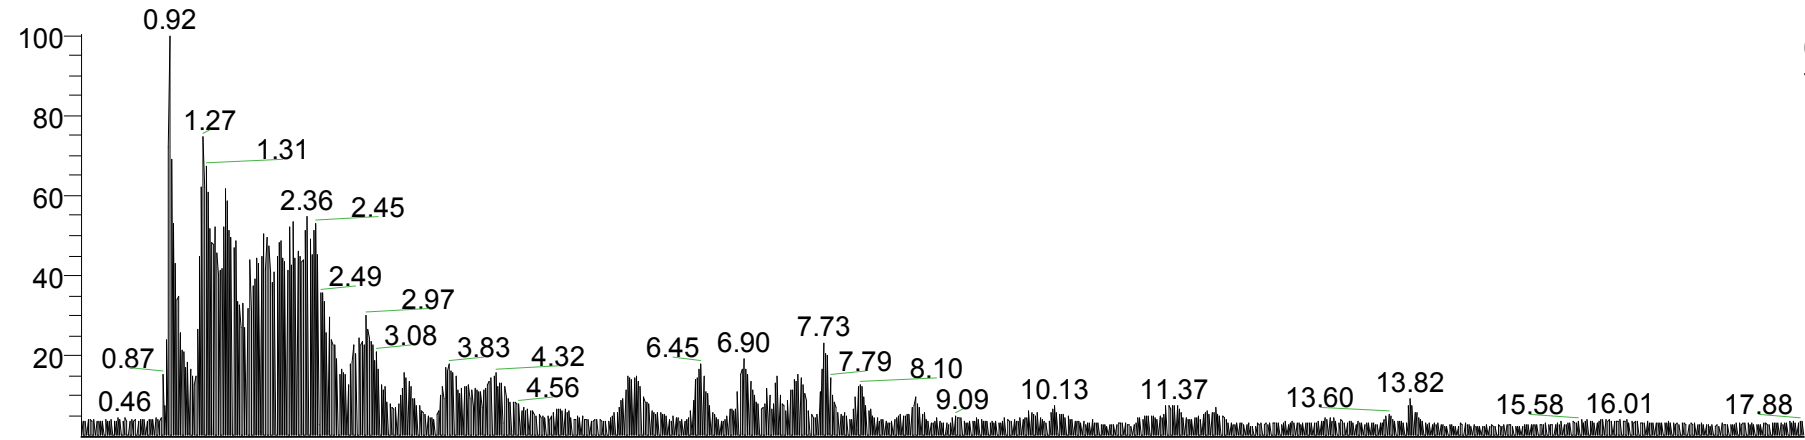

NL:  
6.05E9  
TIC MS  
Hilic\_P\_20220  
118\_2per\_M4

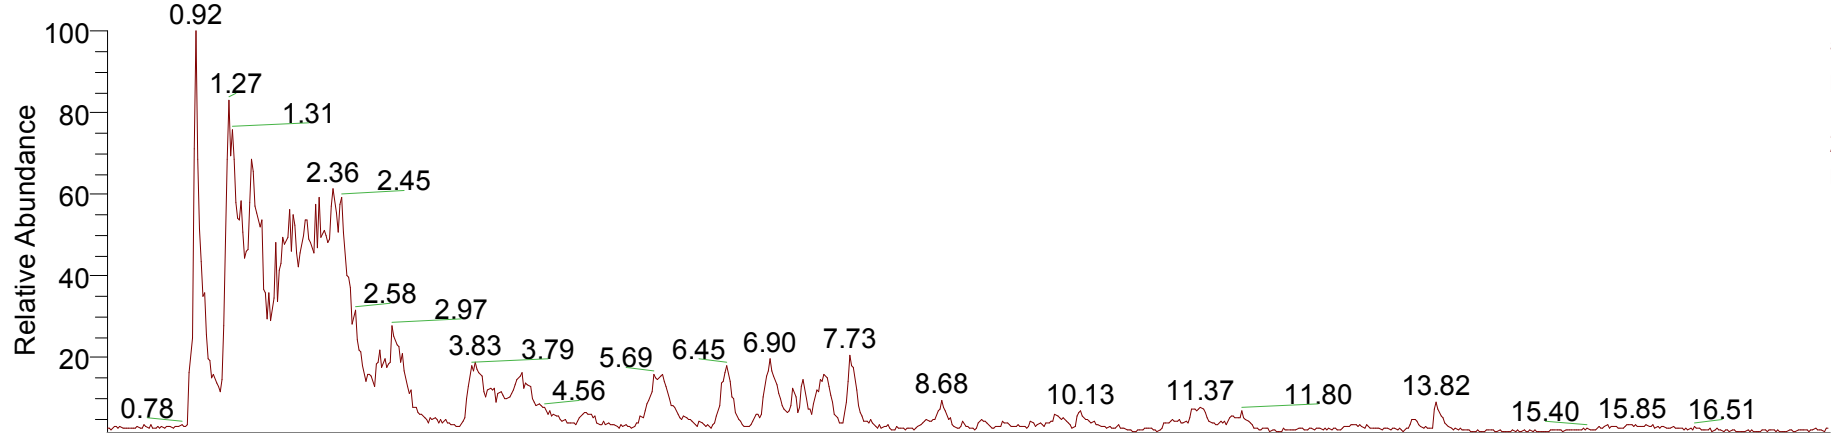

NL:  
5.17E9  
m/z=  
120.00-  
2000.00 F: Full  
ms MS  
Hilic\_P\_20220  
118\_2per\_M4

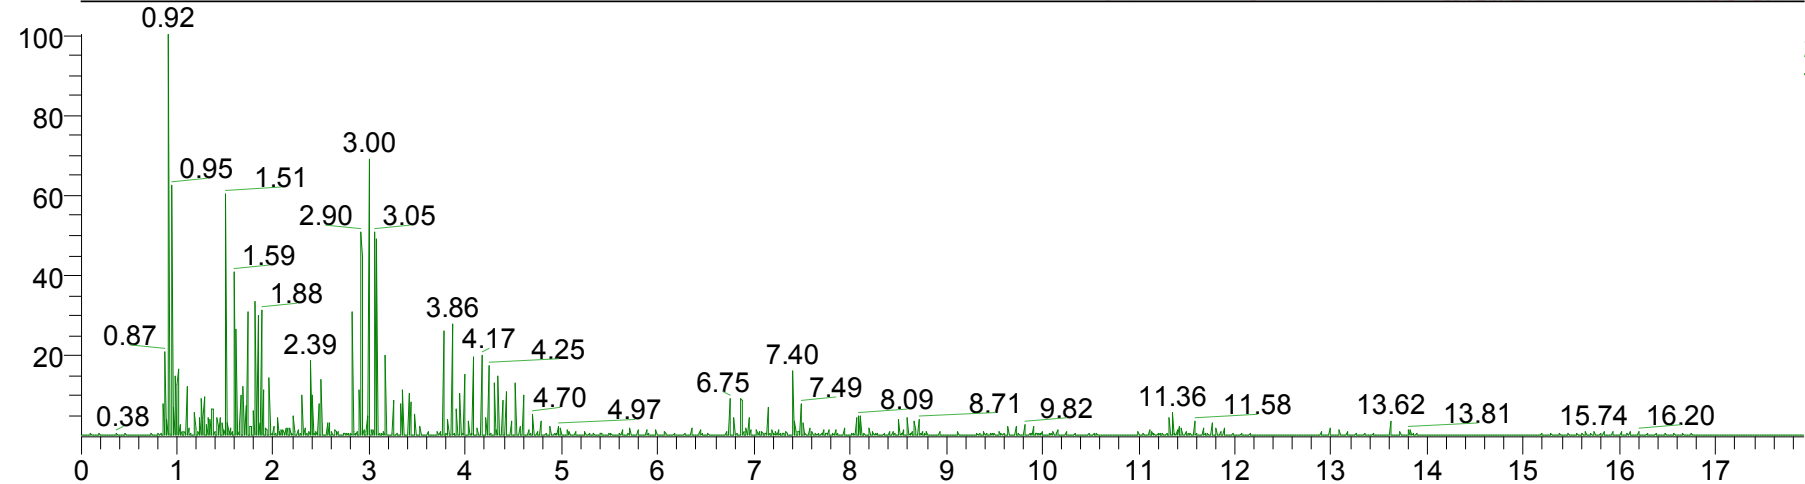

NL:  
2.13E9  
TIC F: Full ms2  
MS  
Hilic\_P\_20220  
118\_2per\_M4

Time (min)

RT: 0.00 - 17.90

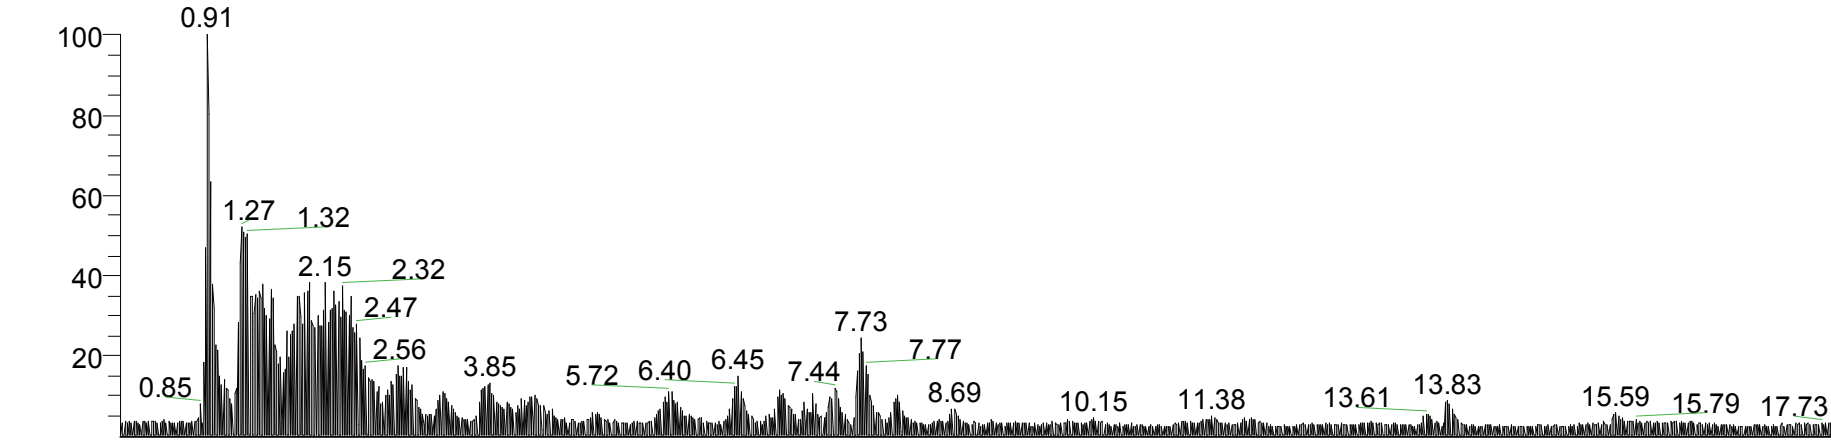

NL:  
6.62E9  
TIC MS  
Hilic\_P\_202201  
18\_2per\_QC1

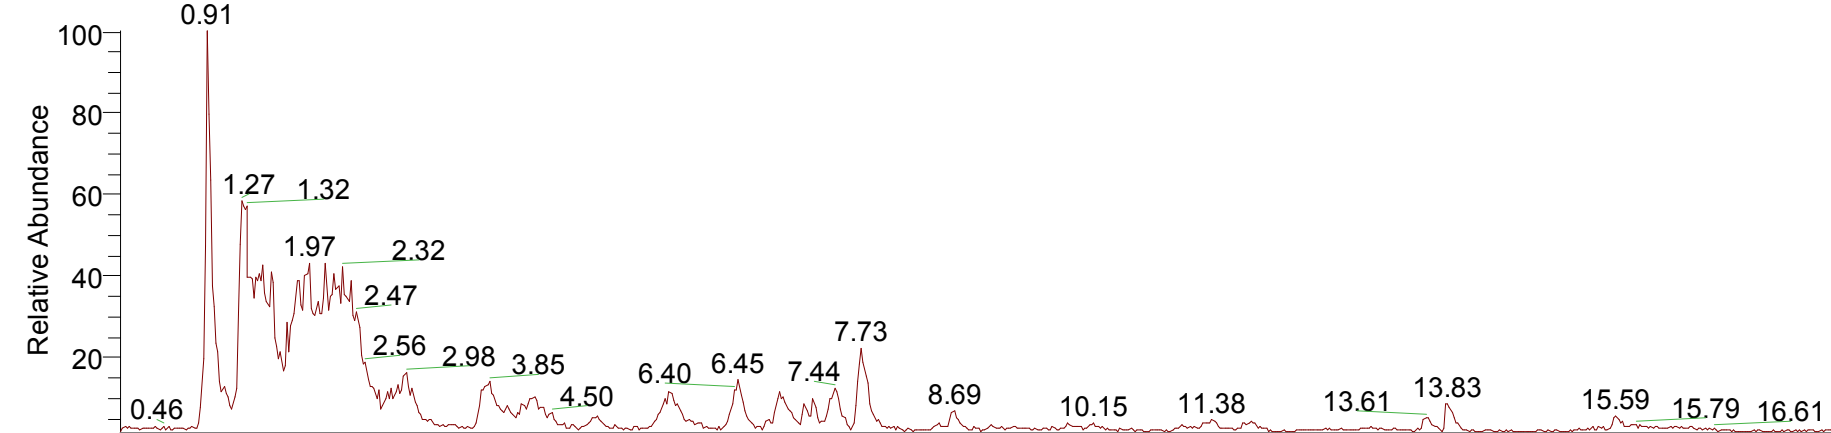

NL:  
5.57E9  
m/z=  
120.00-  
2000.00 F: Full  
ms MS  
Hilic\_P\_202201  
18\_2per\_QC1

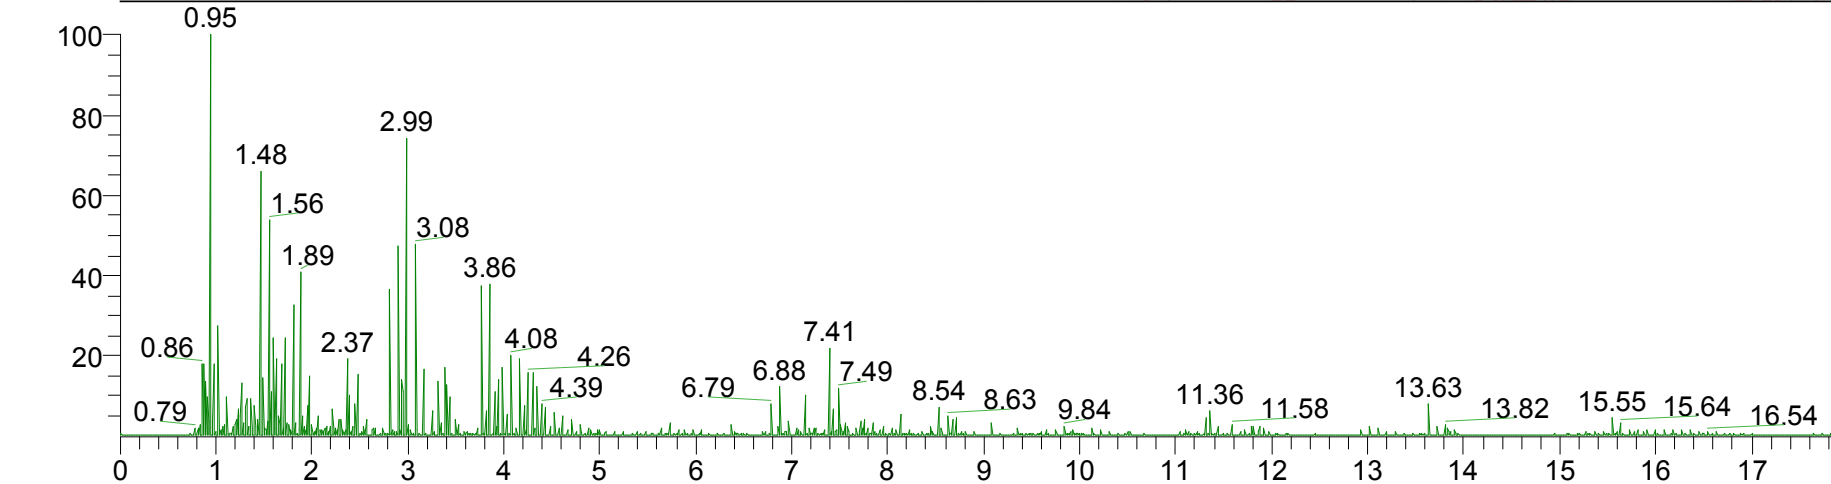

NL:  
1.17E9  
TIC F: Full ms2  
MS  
Hilic\_P\_202201  
18\_2per\_QC1

Time (min)

RT: 0.00 - 17.90

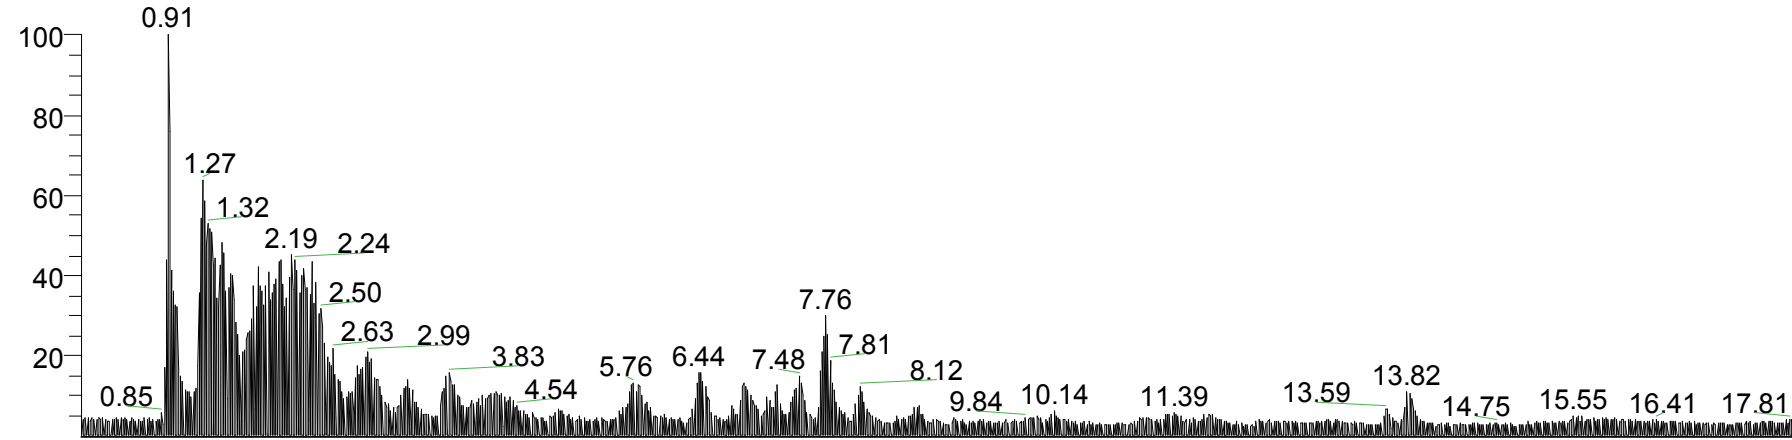

NL:  
5.59E9  
TIC MS  
Hilic\_P\_202201  
18\_2per\_QC2

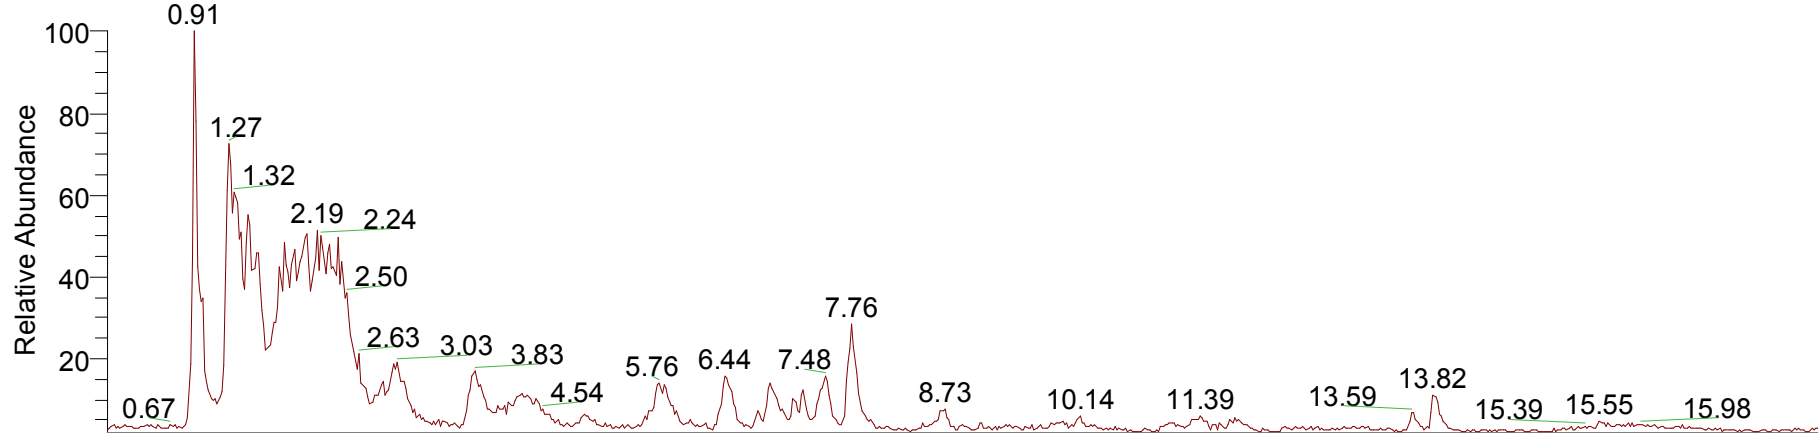

NL:  
4.63E9  
m/z=  
120.00-  
2000.00 F: Full  
ms MS  
Hilic\_P\_202201  
18\_2per\_QC2

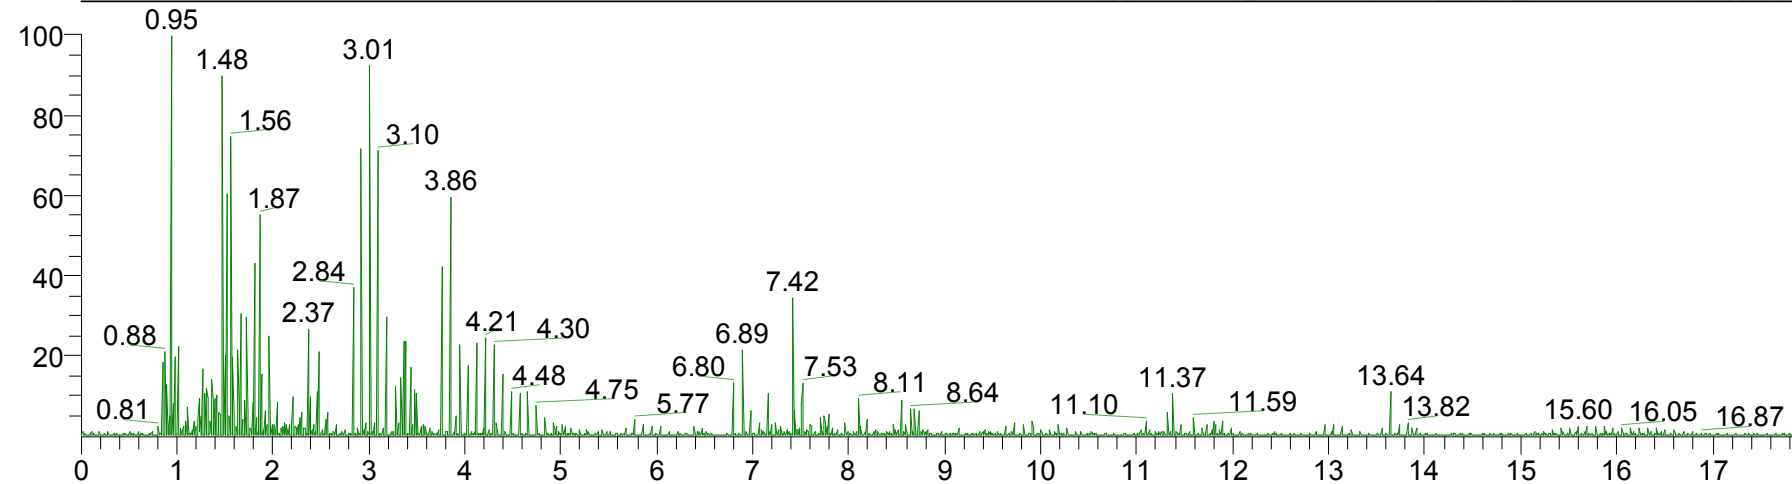

NL:  
8.82E8  
TIC F: Full ms2  
MS  
Hilic\_P\_202201  
18\_2per\_QC2

Time (min)



RT: 0.00 - 17.90

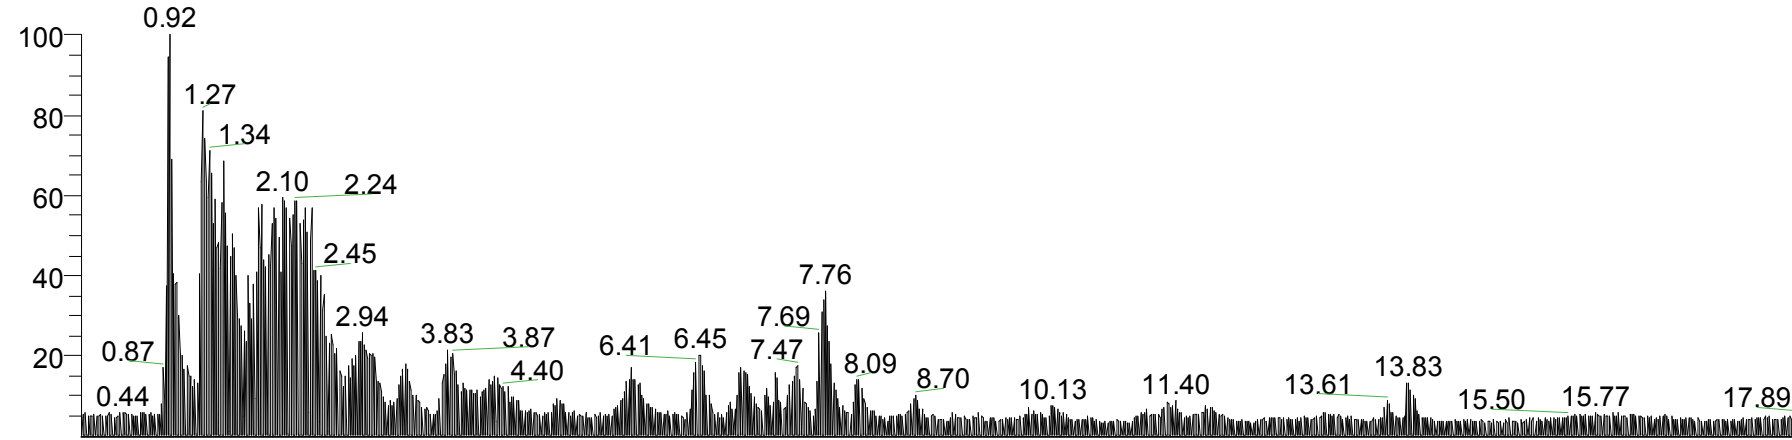

NL:  
4.39E9  
TIC MS  
Hilic\_P\_202201  
18\_2per\_QC3

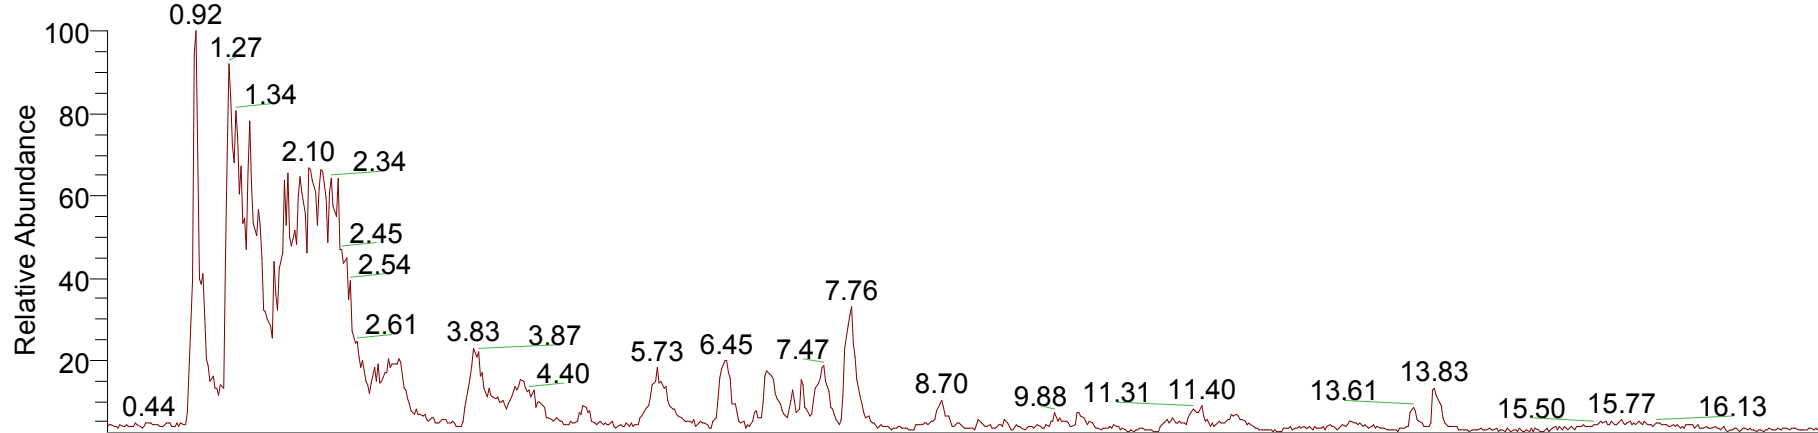

NL:  
3.68E9  
m/z=  
120.00-  
2000.00 F: Full  
ms MS  
Hilic\_P\_202201  
18\_2per\_QC3

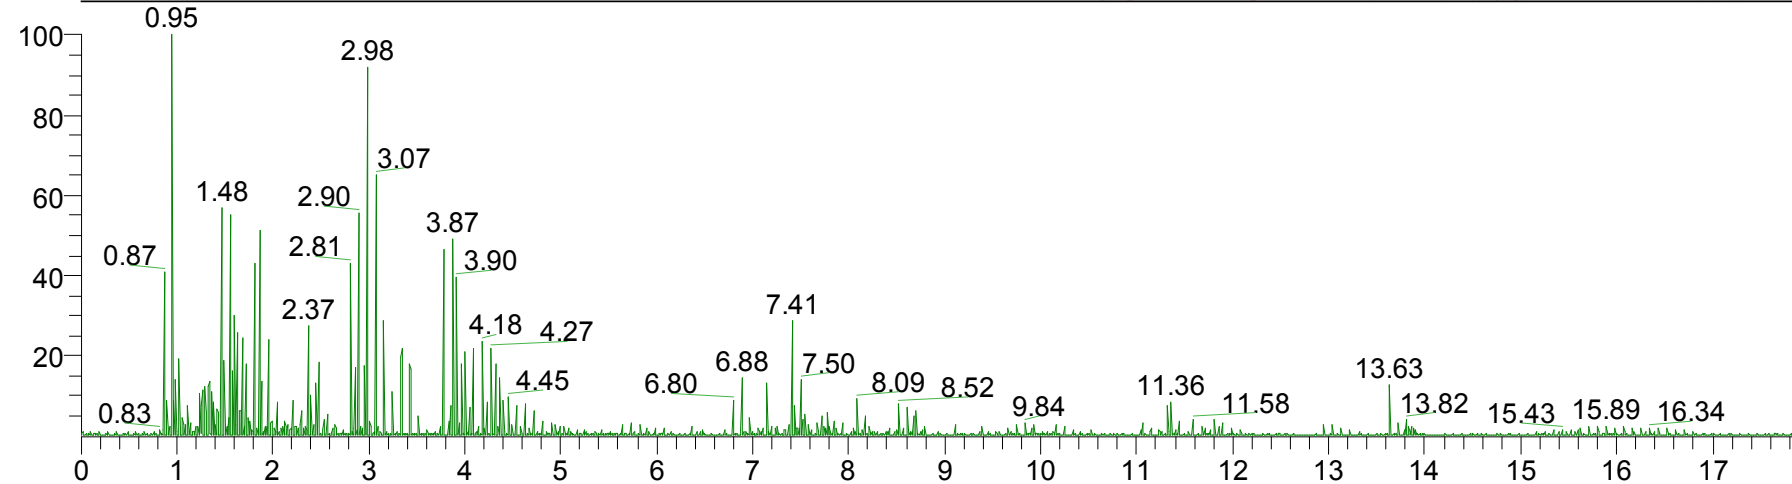

NL:  
9.28E8  
TIC F: Full ms2  
MS  
Hilic\_P\_202201  
18\_2per\_QC3

Time (min)

RT: 0.00 - 17.00

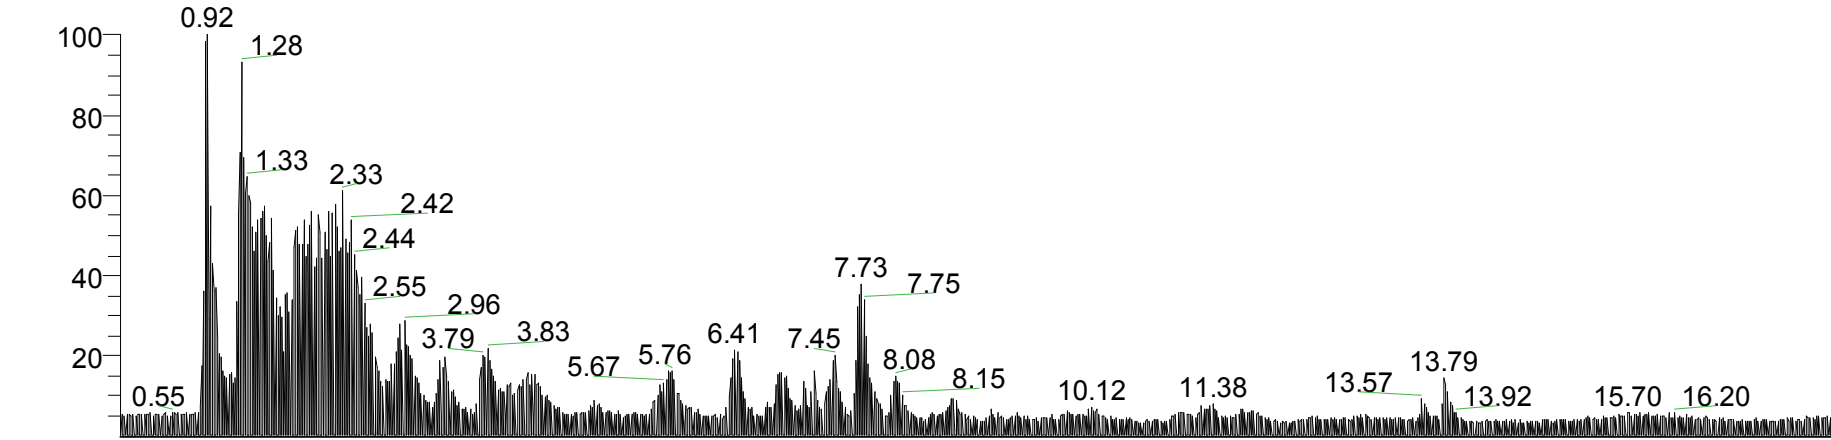

NL:  
4.34E9  
TIC MS  
Hilic\_P\_202201  
18\_2per\_QC4

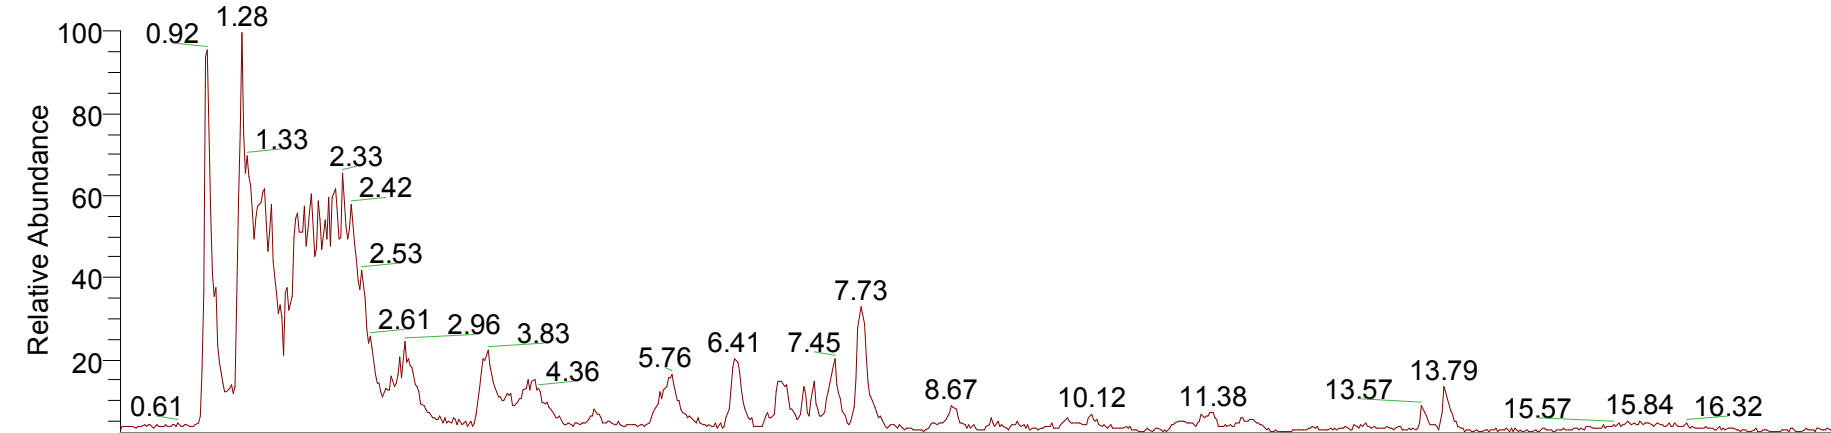

NL:  
3.83E9  
m/z=  
120.00-  
2000.00 F: Full  
ms MS  
Hilic\_P\_202201  
18\_2per\_QC4

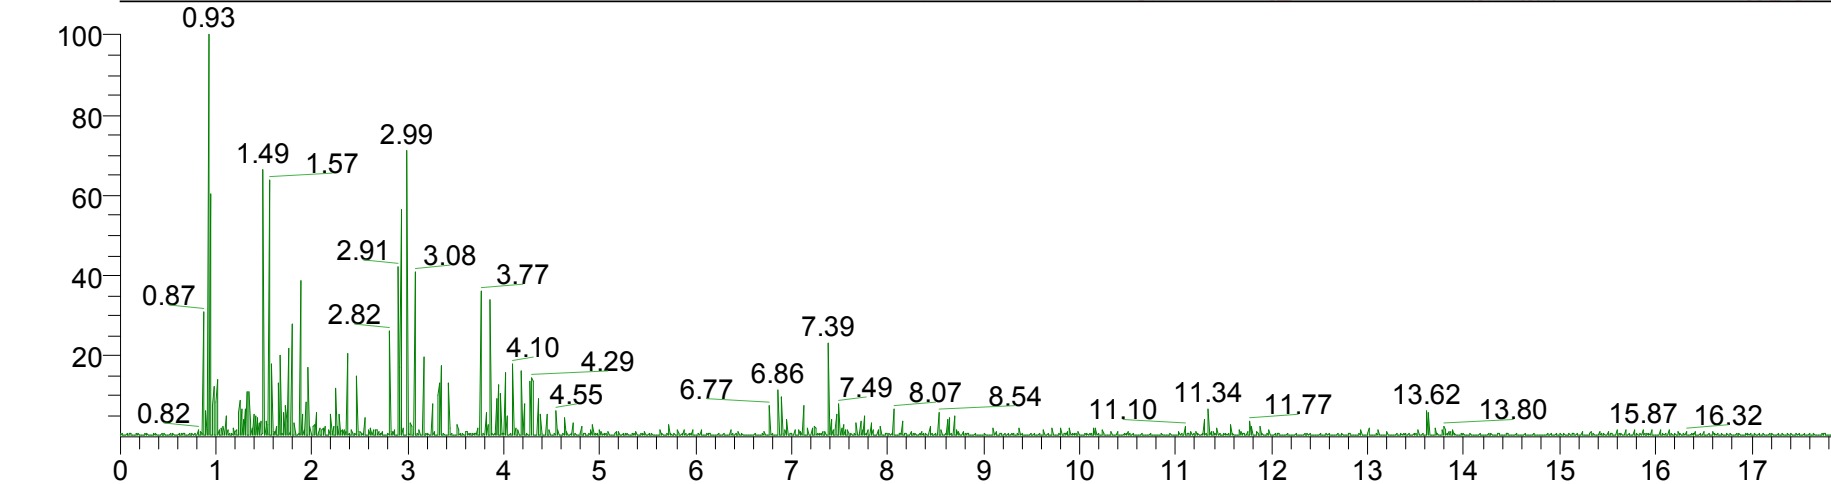

NL:  
1.27E9  
TIC F: Full ms2  
MS  
Hilic\_P\_202201  
18\_2per\_QC4

RT: 0.00 - 17.90

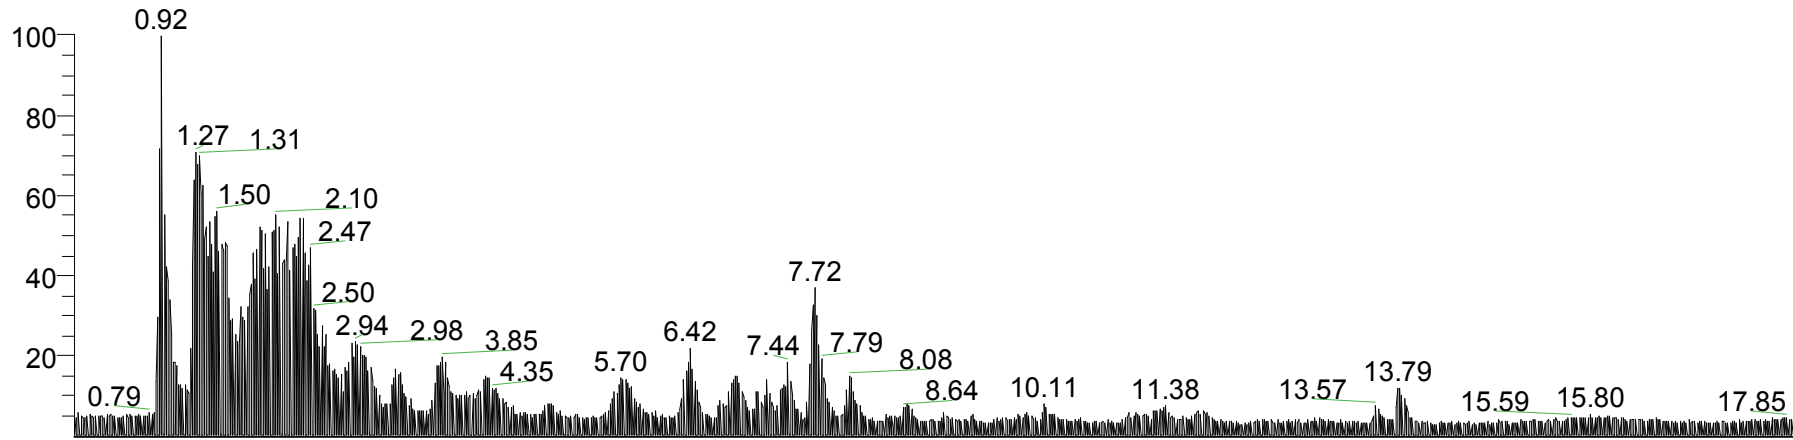

NL:  
4.74E9  
TIC MS  
Hilic\_P\_202201  
18\_2per\_QC5

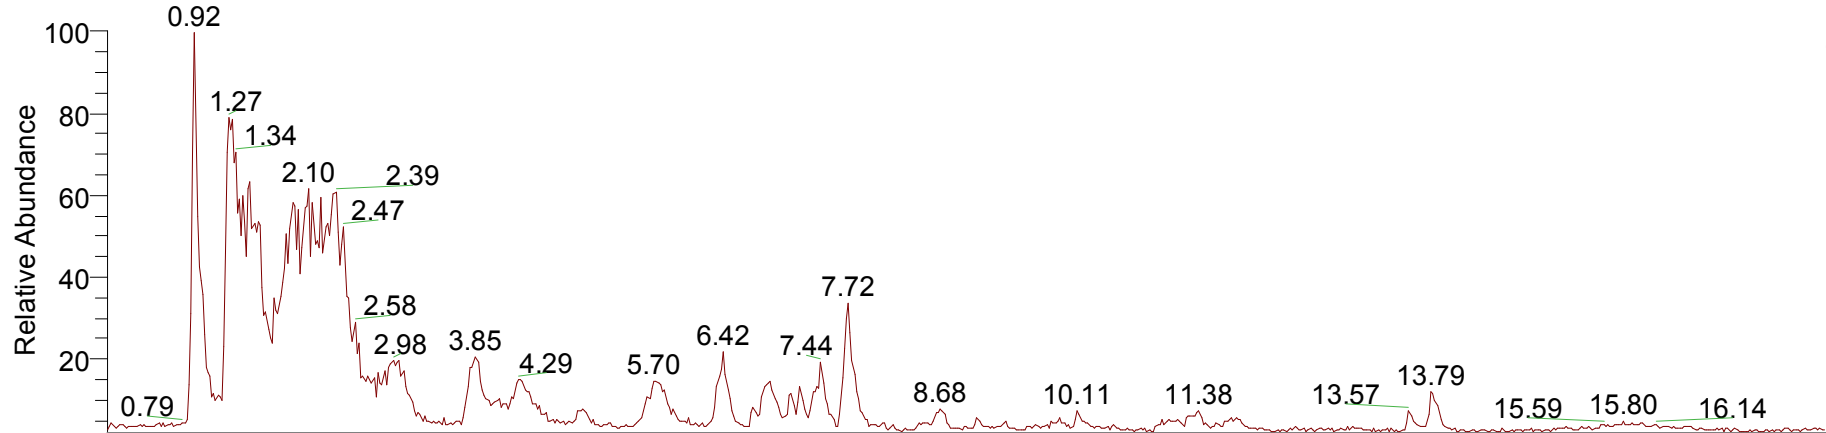

NL:  
4.01E9  
m/z=  
120.00-  
2000.00 F: Full  
ms MS  
Hilic\_P\_202201  
18\_2per\_QC5

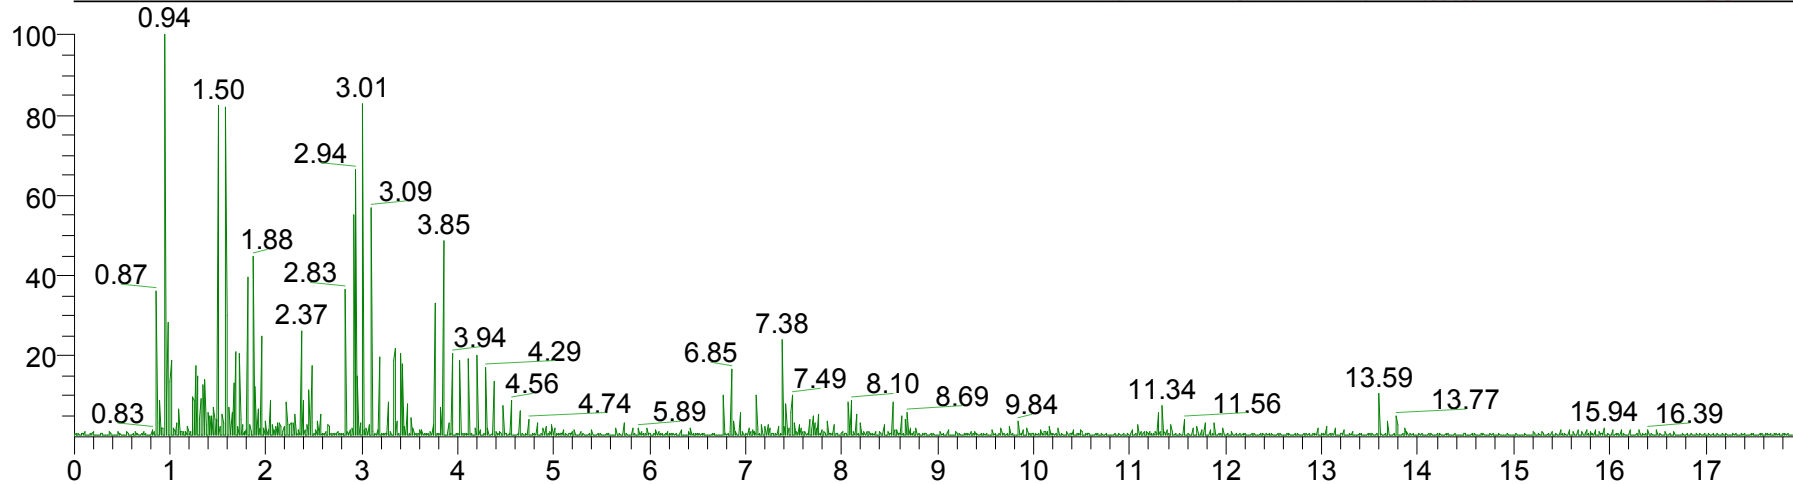

NL:  
1.02E9  
TIC F: Full ms2  
MS  
Hilic\_P\_202201  
18\_2per\_QC5

Time (min)

RT: 0.00 - 17.90

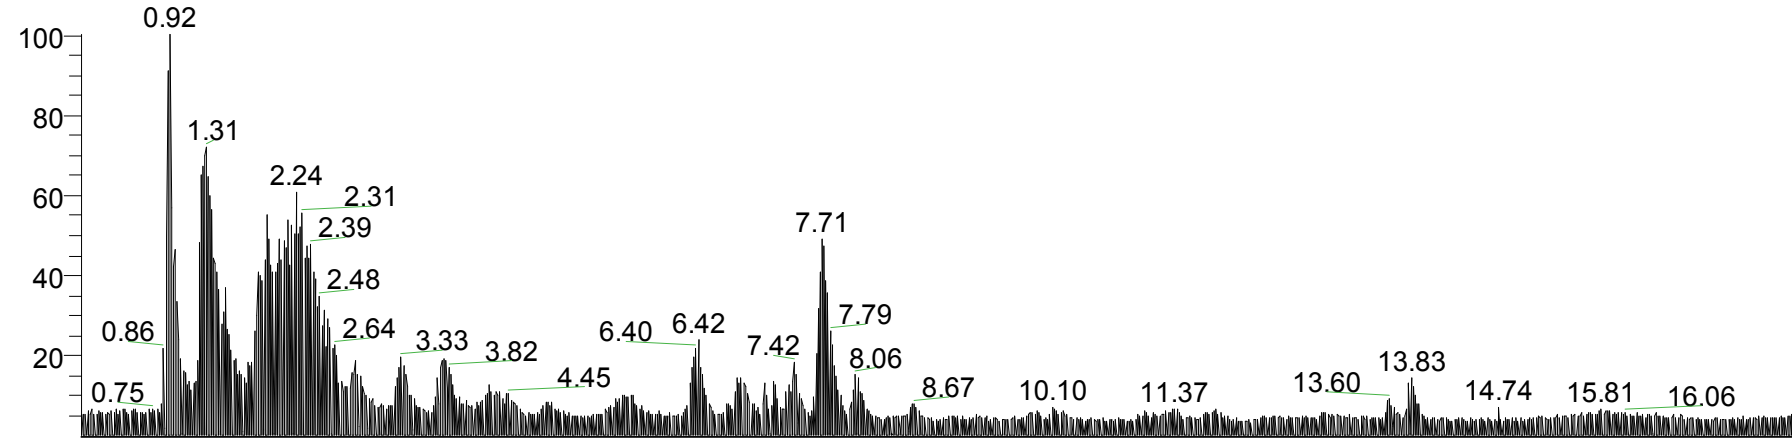

NL:  
3.97E9  
TIC MS  
Hilic\_P\_20220  
118\_2per\_S1

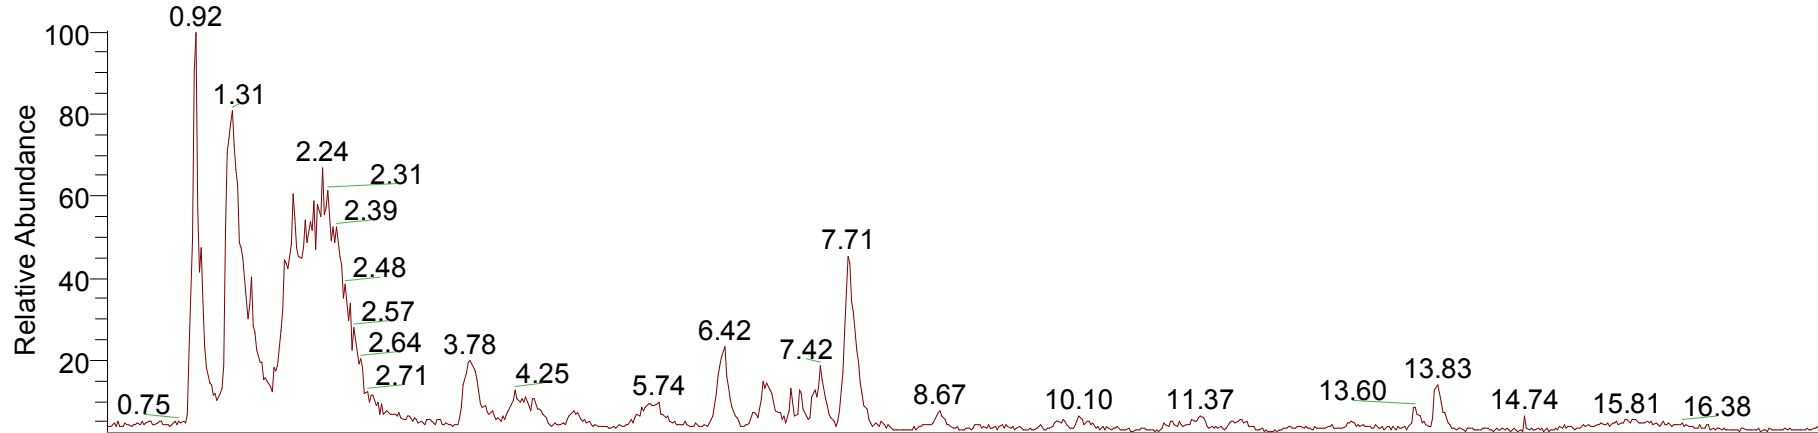

NL:  
3.38E9  
m/z=  
120.00-  
2000.00 F: Full  
ms MS  
Hilic\_P\_20220  
118\_2per\_S1

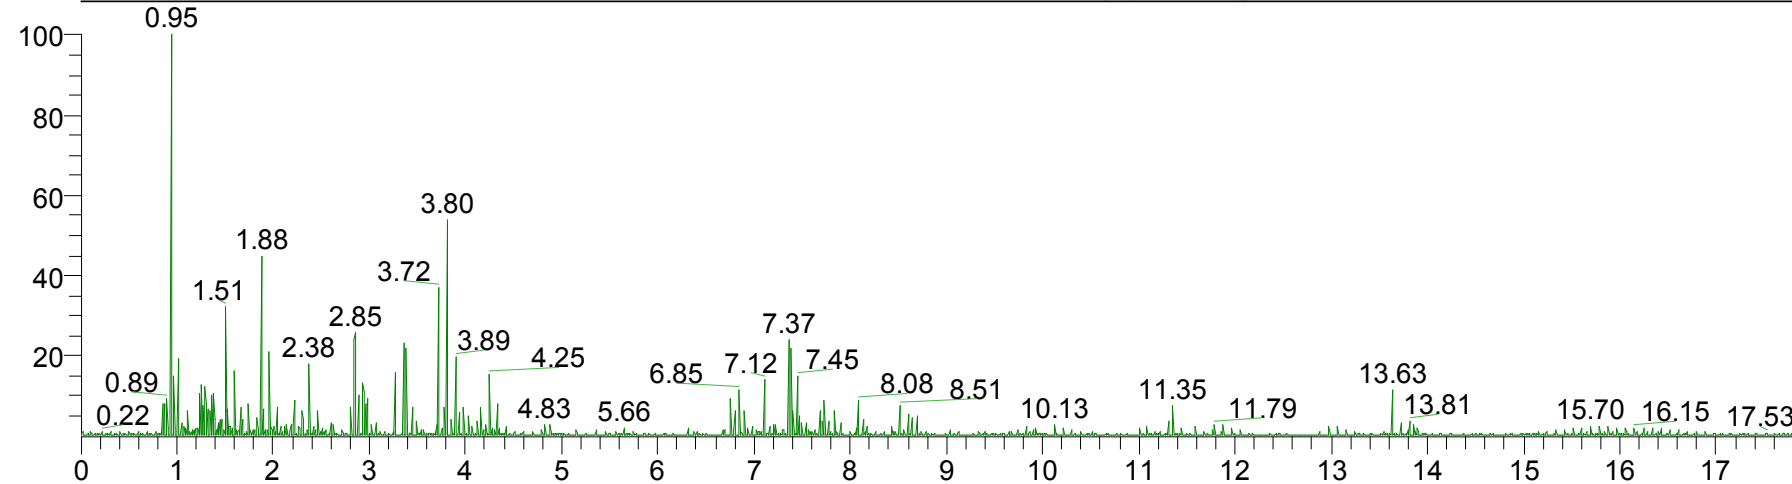

NL:  
8.77E8  
TIC F: Full ms2  
MS  
Hilic\_P\_20220  
118\_2per\_S1

Time (min)

RT: 0.00 - 17.90

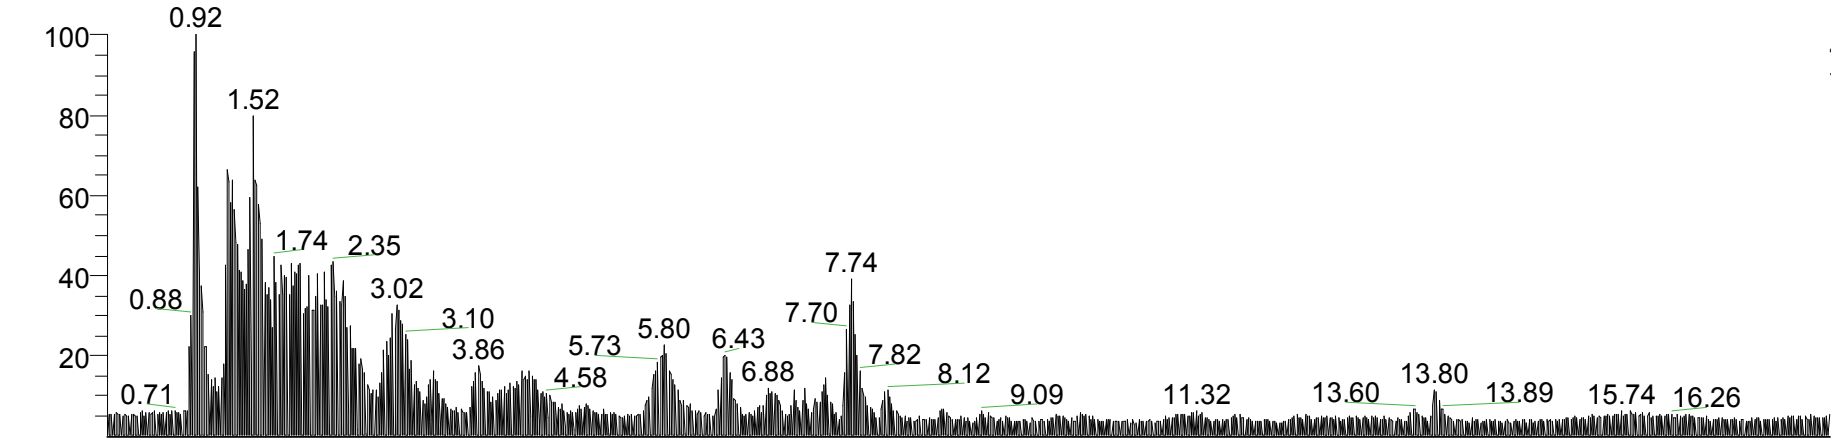

NL:  
4.16E9  
TIC MS  
Hilic\_P\_20220  
118\_2per\_S2

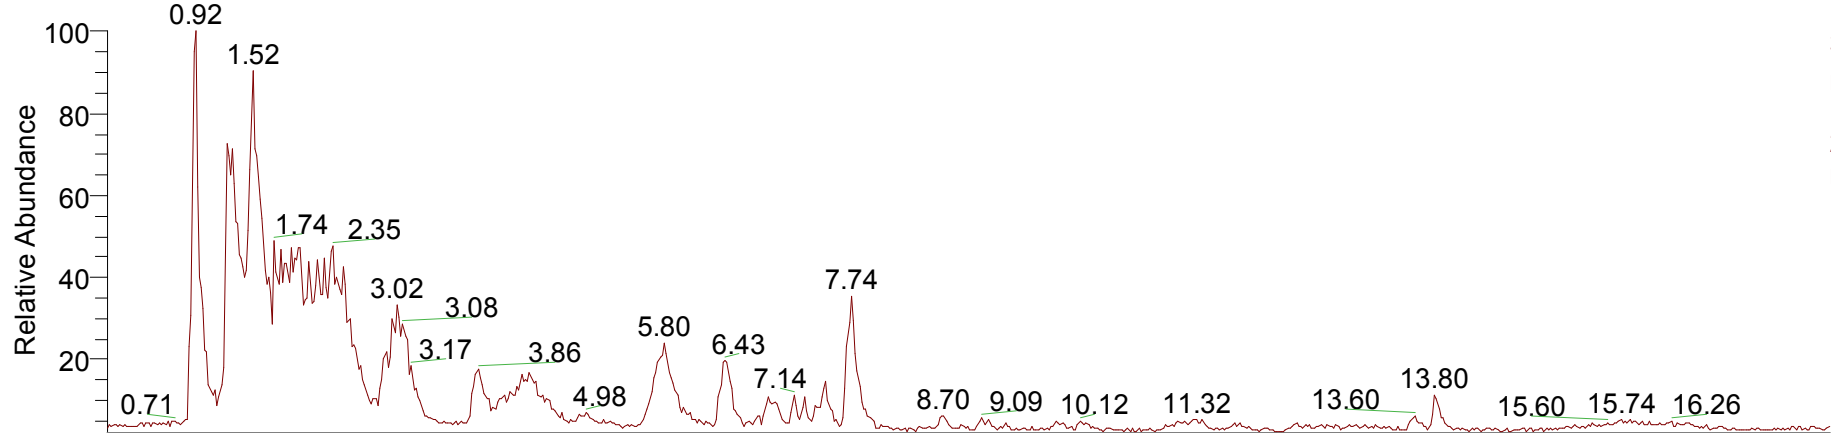

NL:  
3.52E9  
m/z=  
120.00-  
2000.00 F: Full  
ms MS  
Hilic\_P\_20220  
118\_2per\_S2

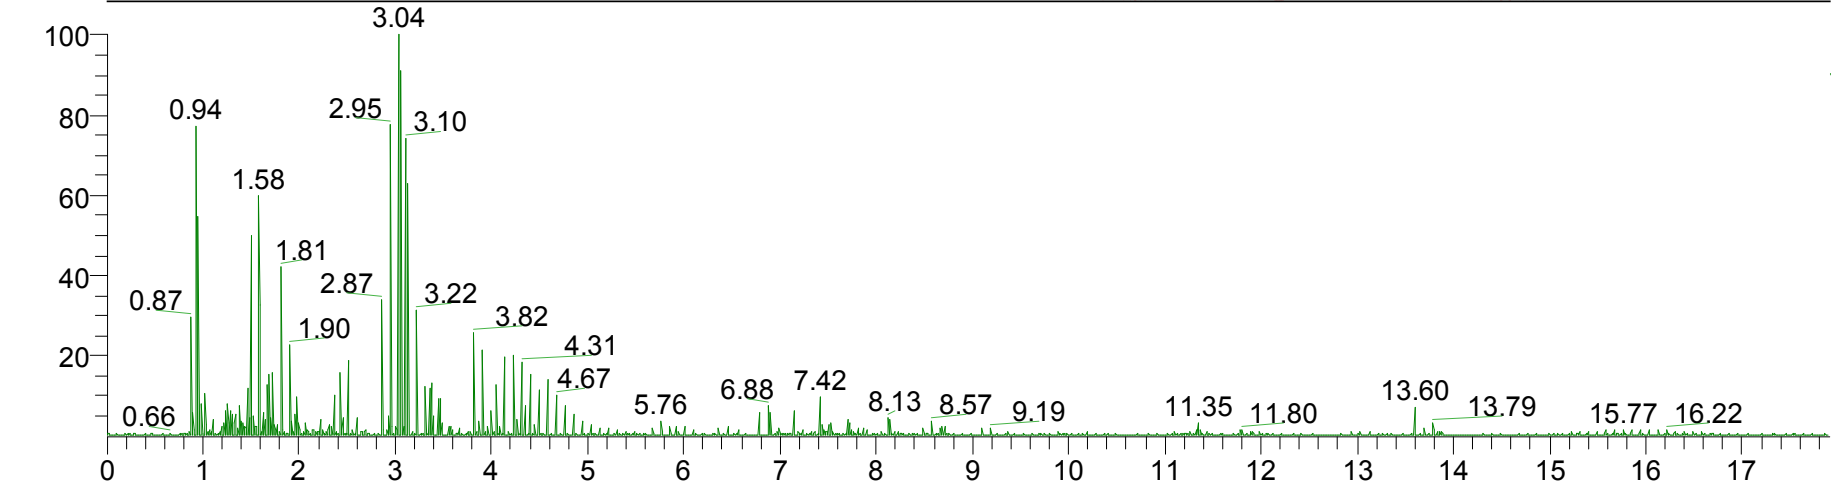

NL:  
1.31E9  
TIC F: Full ms2  
MS  
Hilic\_P\_20220  
118\_2per\_S2

Time (min)

RT: 0.00 - 17.91

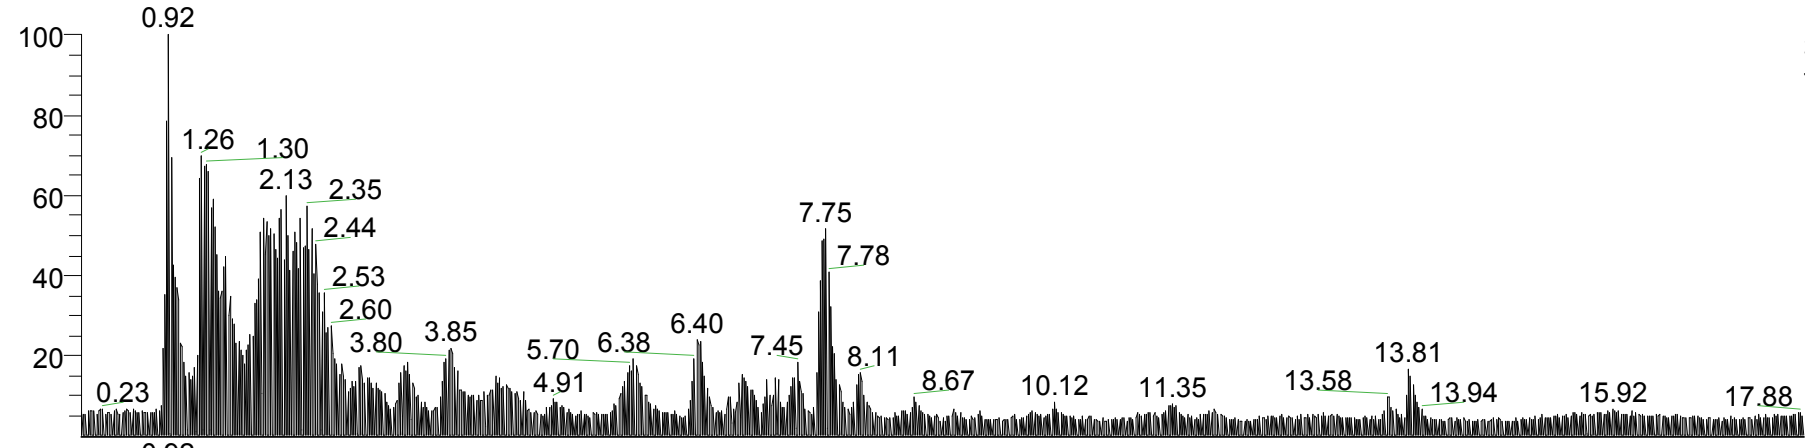

NL:  
3.92E9  
TIC MS  
Hilic\_P\_20220  
118\_2per\_S3

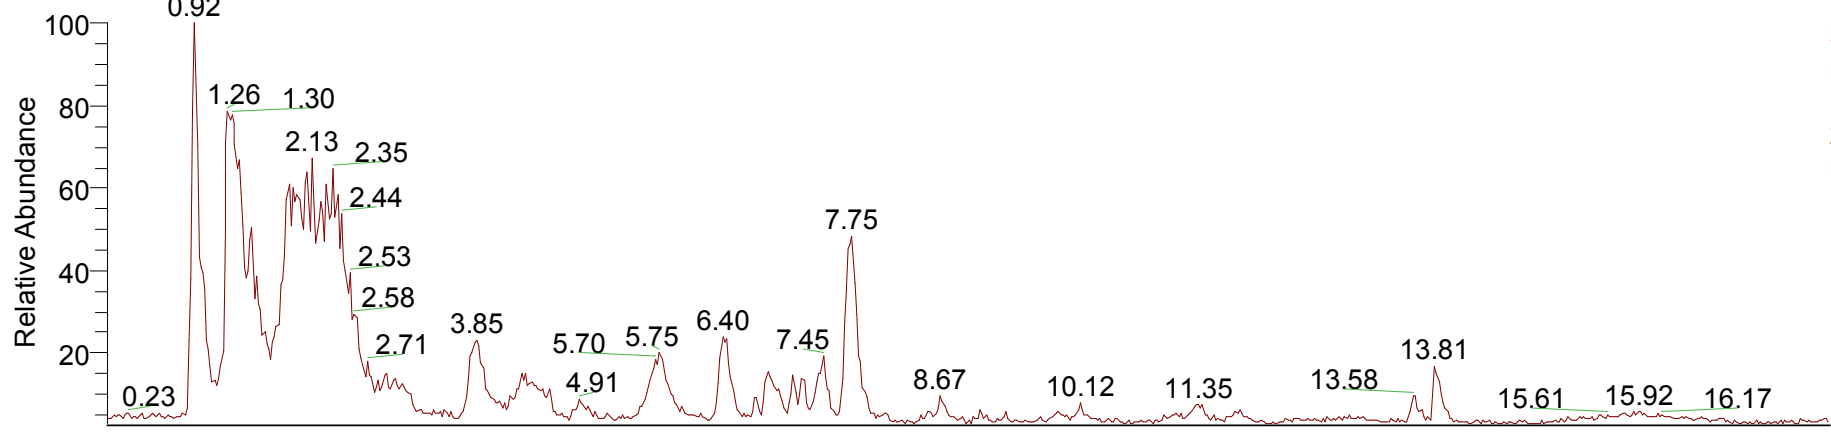

NL:  
3.25E9  
m/z=  
120.00-  
2000.00 F: Full  
ms MS  
Hilic\_P\_20220  
118\_2per\_S3

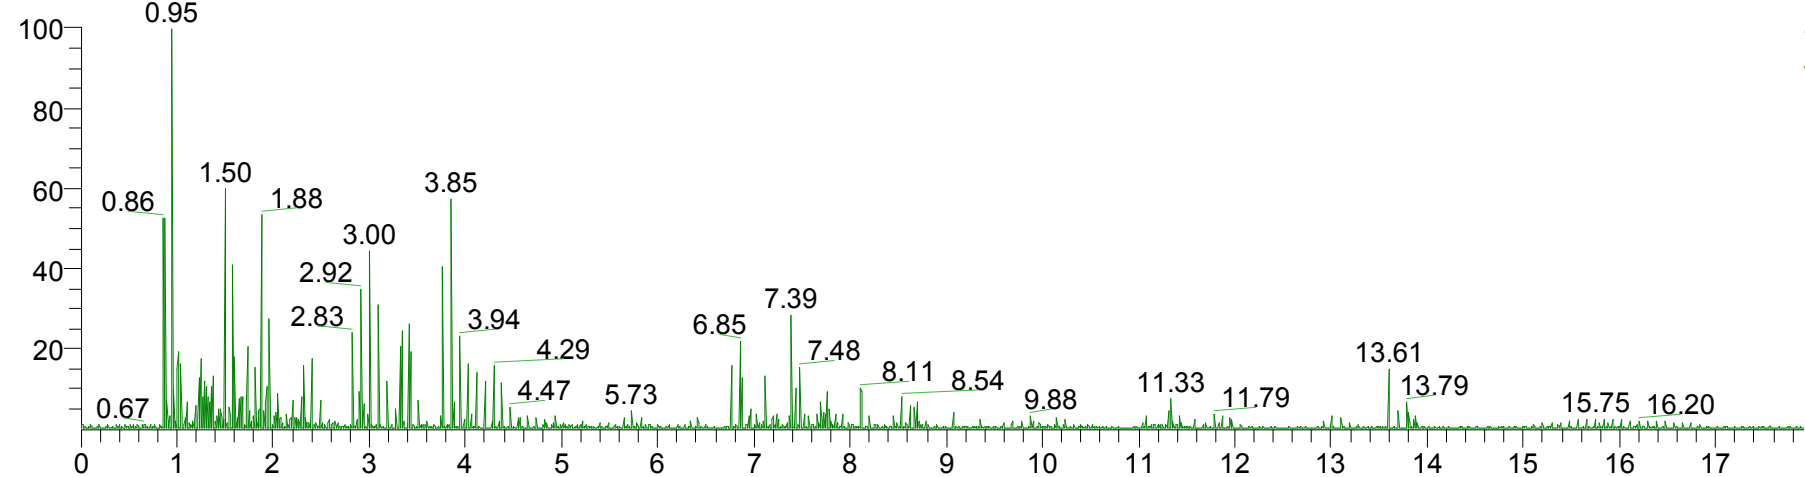

NL:  
7.91E8  
TIC F: Full ms2  
MS  
Hilic\_P\_20220  
118\_2per\_S3

Time (min)

RT: 0.00 - 17.90

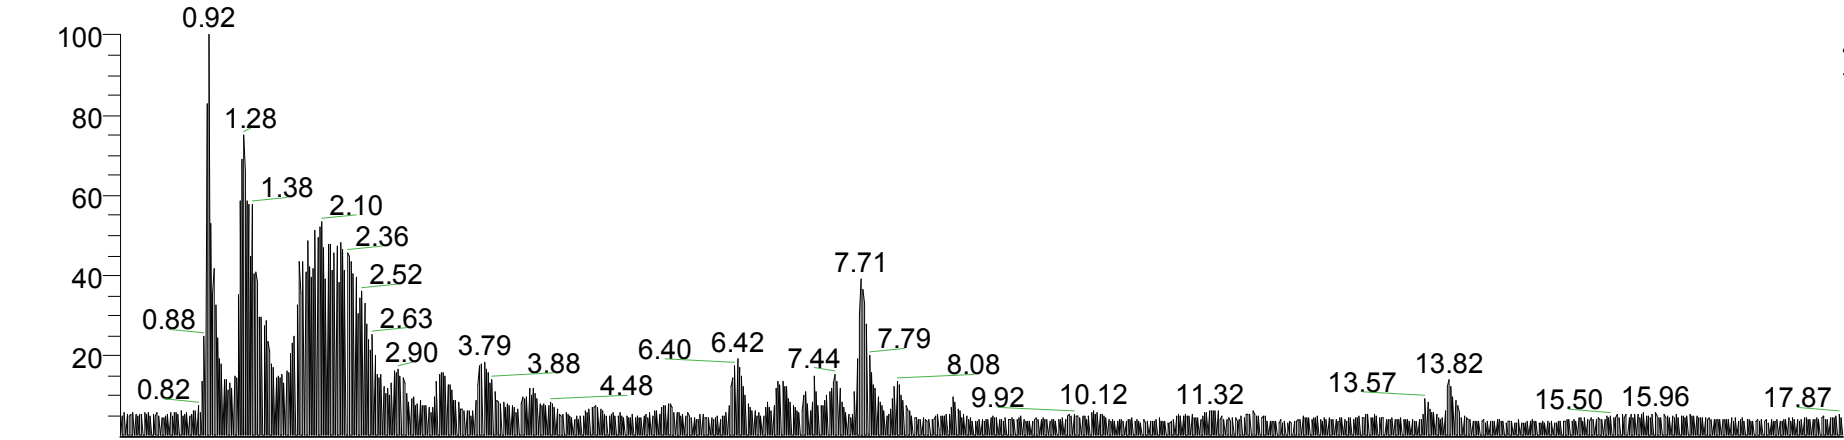

NL:  
4.38E9  
TIC MS  
Hilic\_P\_20220  
118\_2per\_S4

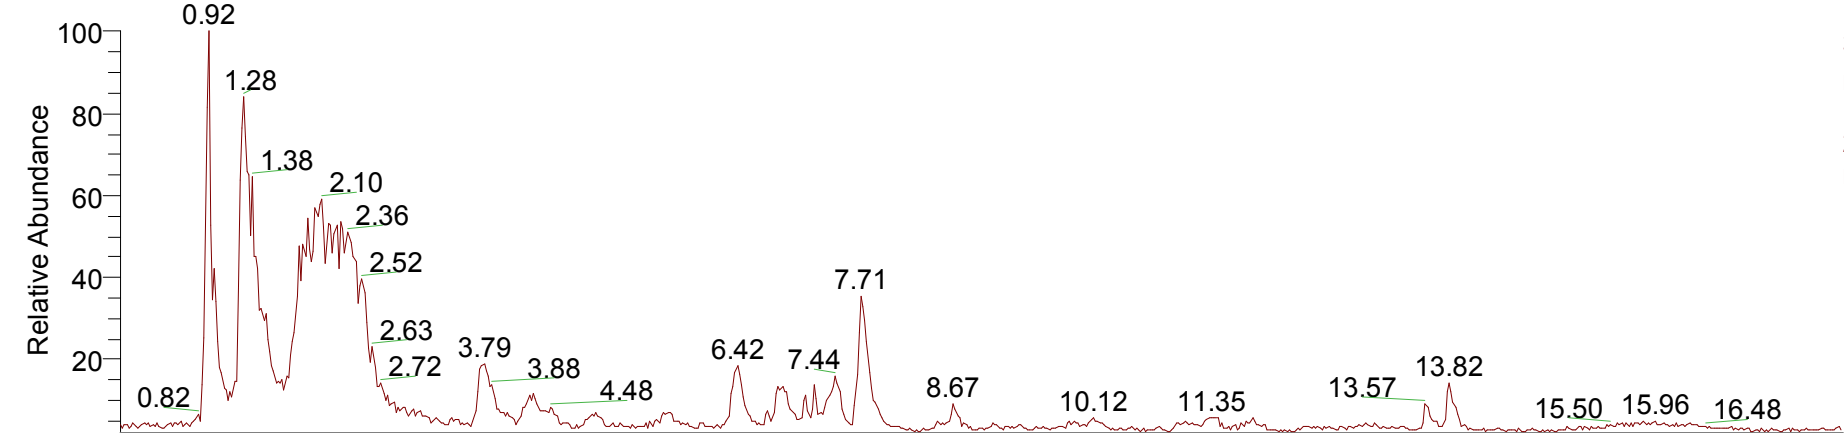

NL:  
3.70E9  
m/z=  
120.00-  
2000.00 F: Full  
ms MS  
Hilic\_P\_20220  
118\_2per\_S4

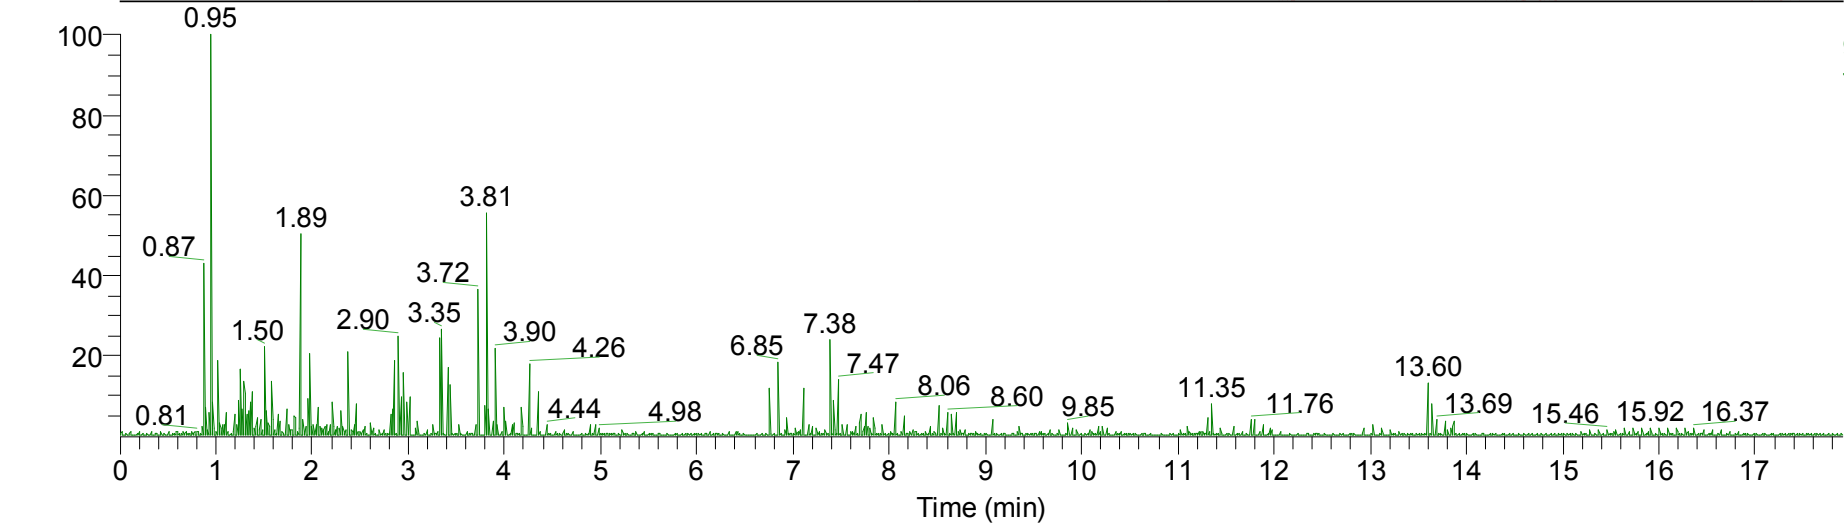

NL:  
9.07E8  
TIC F: Full ms2  
MS  
Hilic\_P\_20220  
118\_2per\_S4

RT: 0.00 - 17.90

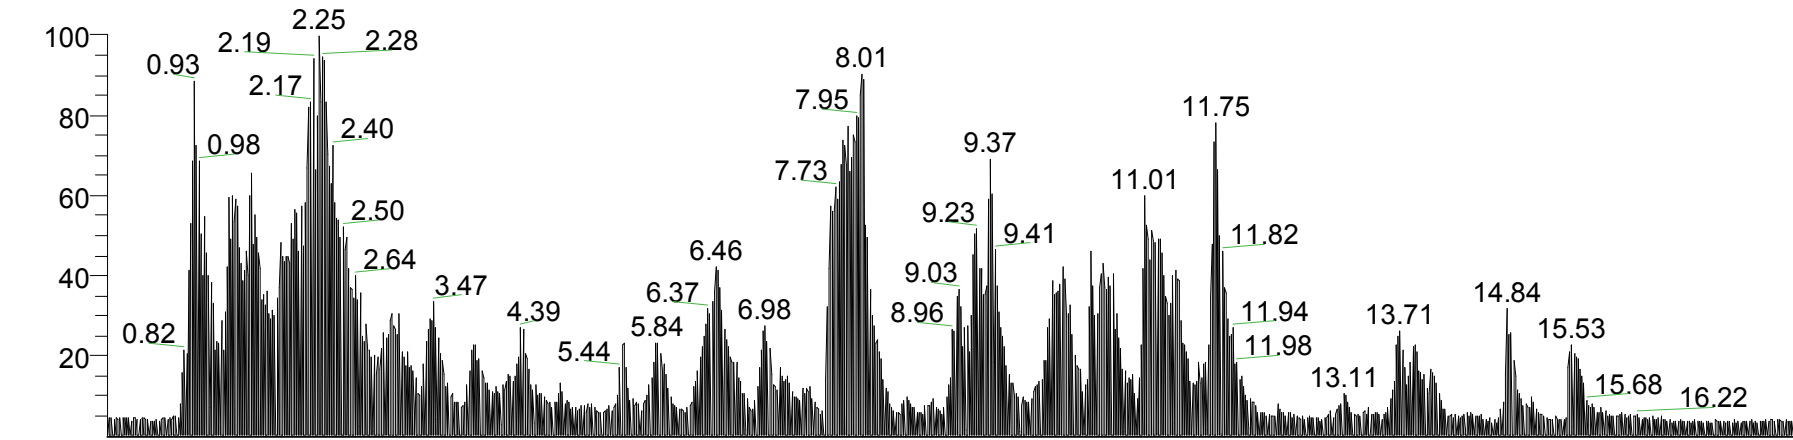

NL:  
5.63E9  
TIC MS  
Hilic\_P\_Junti\_202  
20118\_2per\_1\_5  
0\_1

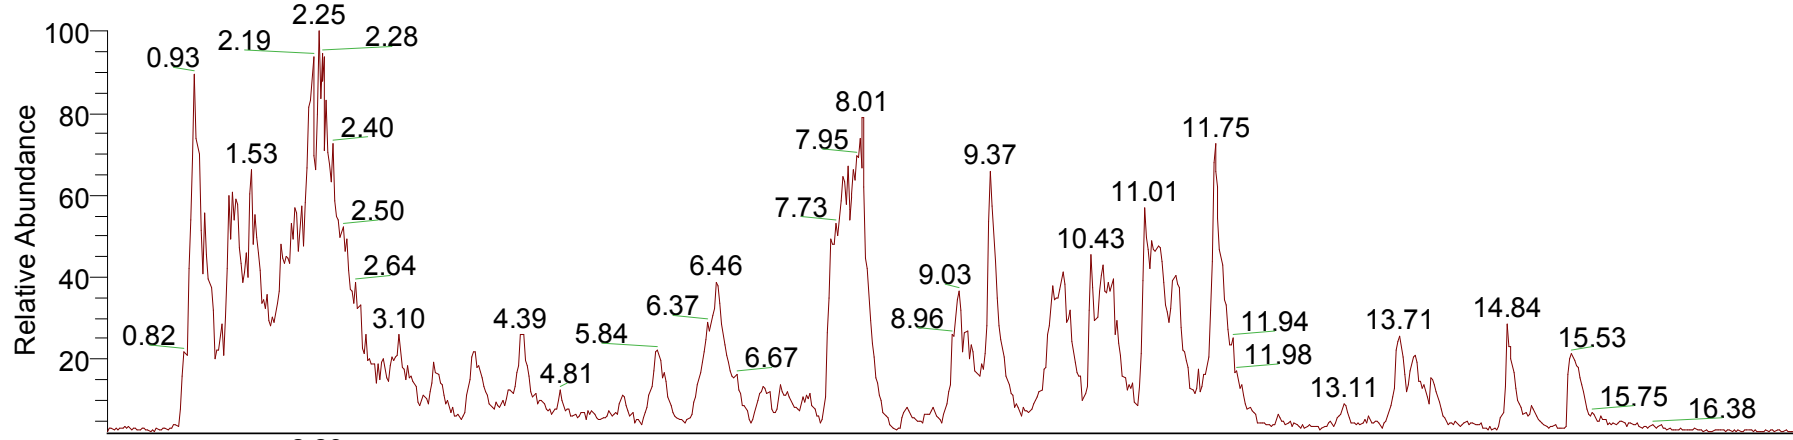

NL:  
5.37E9  
m/z=  
120.00-2000.00  
F: Full ms MS  
Hilic\_P\_Junti\_202  
20118\_2per\_1\_5  
0\_1

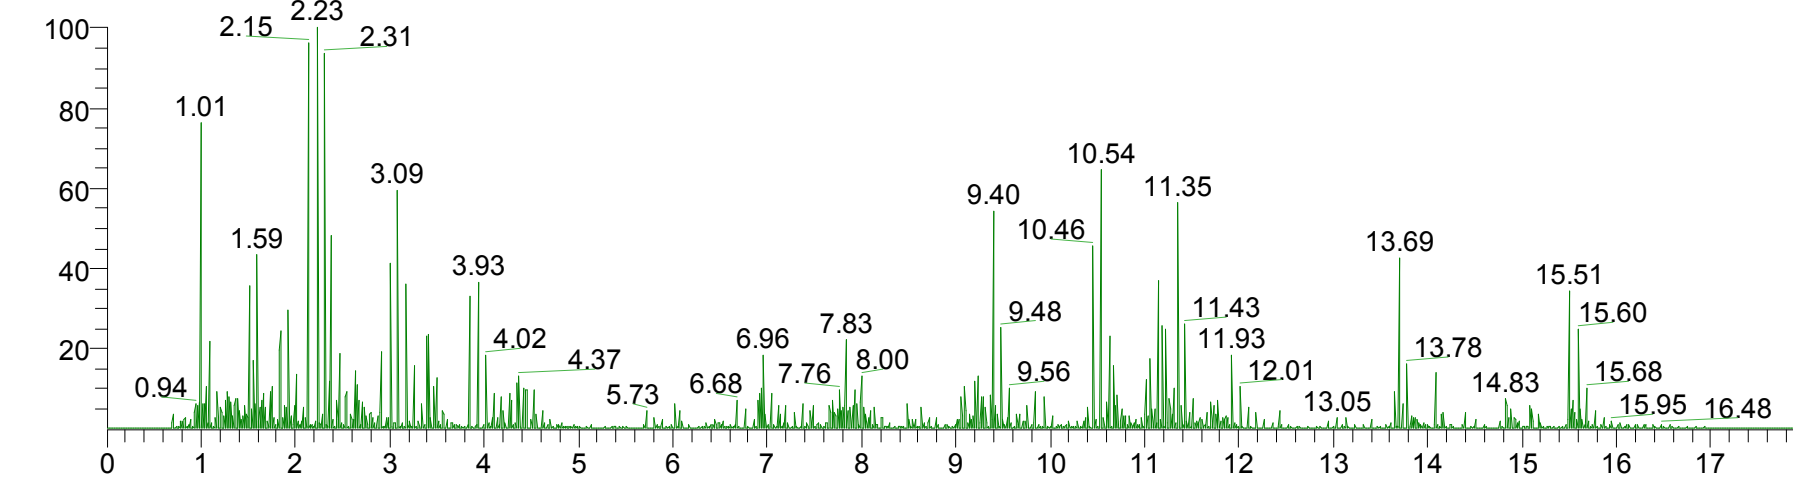

NL:  
1.89E9  
TIC F: Full ms2  
MS  
Hilic\_P\_Junti\_202  
20118\_2per\_1\_5  
0\_1

Time (min)



RT: 0.00 - 17.90

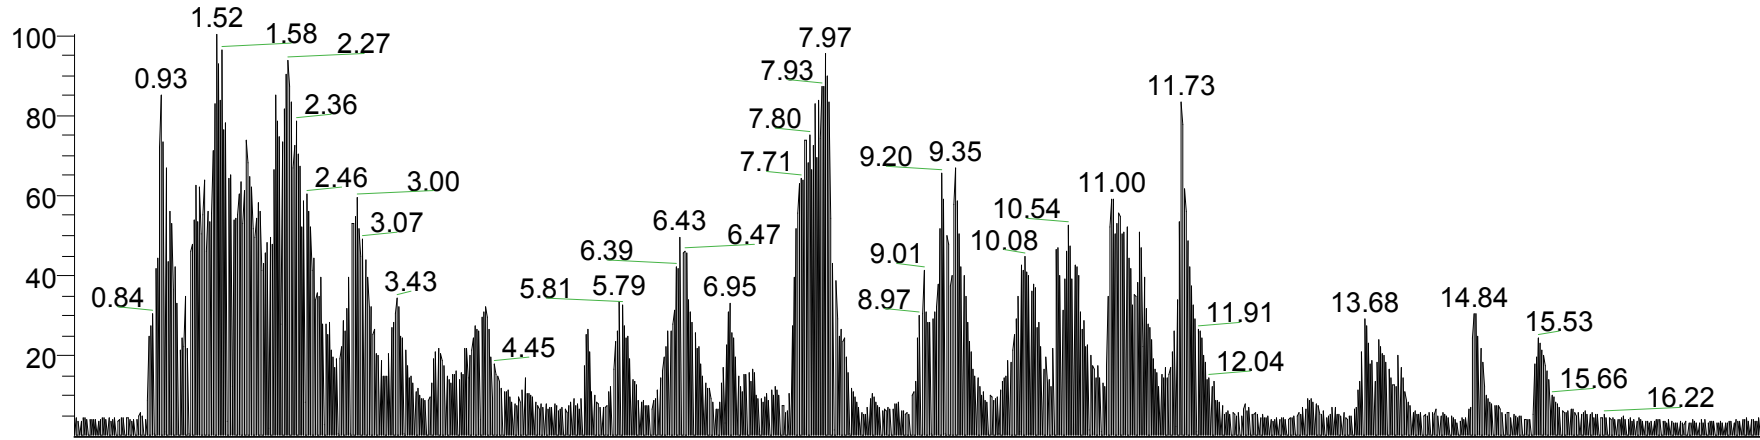

NL:  
5.43E9  
TIC MS  
Hilic\_P\_Junti\_202  
20118\_2per\_1\_5  
0\_2

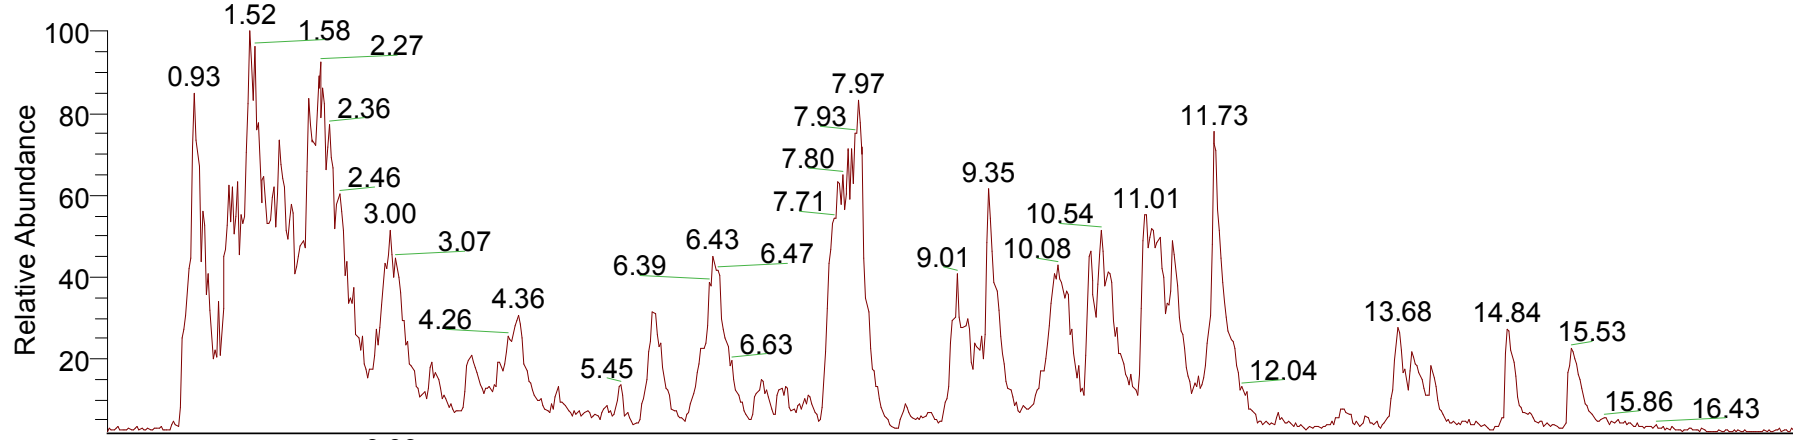

NL:  
5.26E9  
m/z=  
120.00-2000.00  
F: Full ms MS  
Hilic\_P\_Junti\_202  
20118\_2per\_1\_5  
0\_2

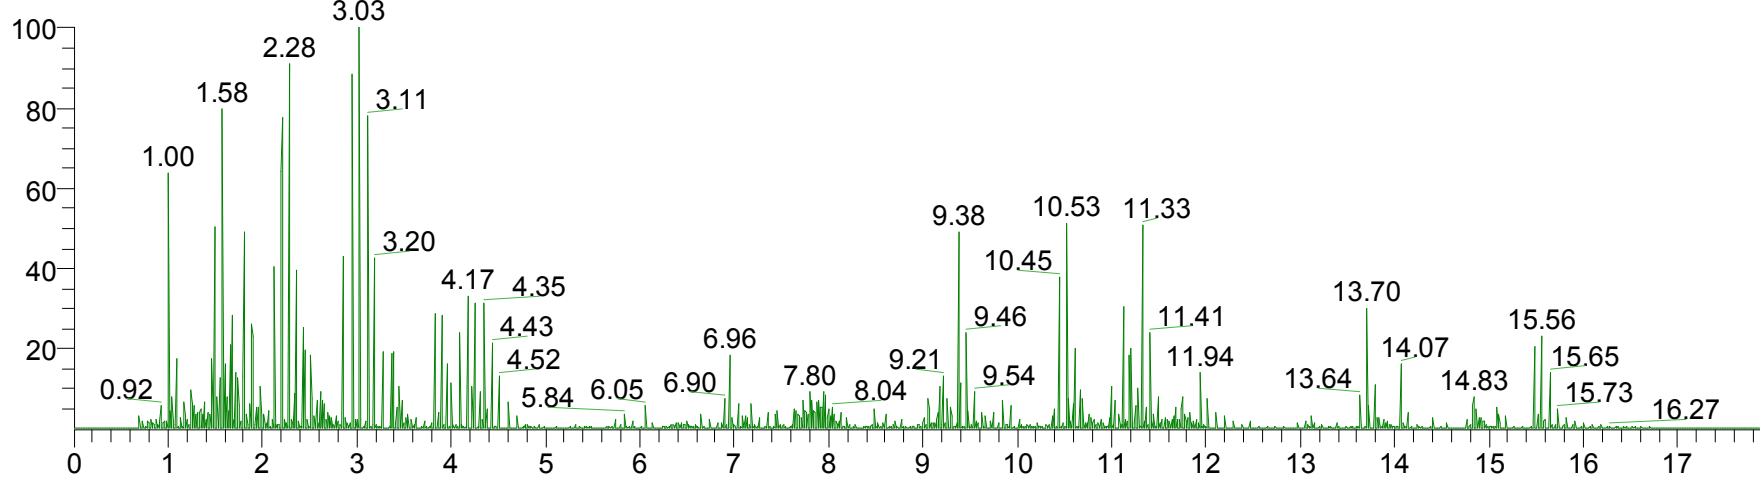

NL:  
2.37E9  
TIC F: Full ms2  
MS  
Hilic\_P\_Junti\_202  
20118\_2per\_1\_5  
0\_2

Time (min)

RT: 0.00 - 17.90

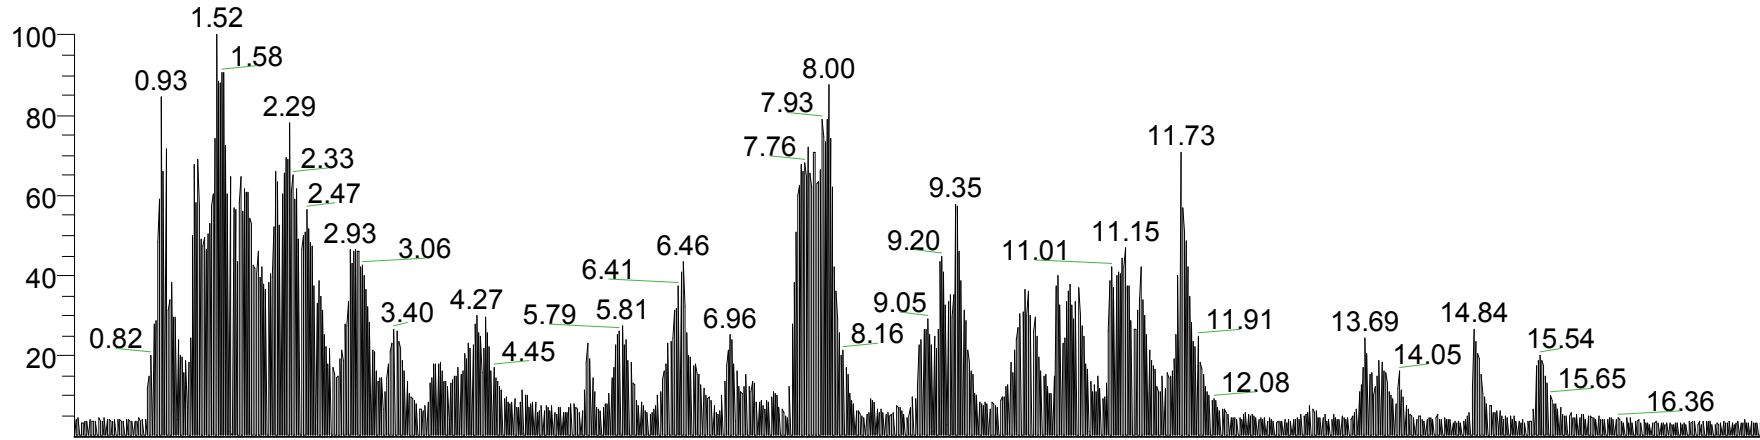

NL:  
5.99E9  
TIC MS  
Hilic\_P\_Junti\_202  
20118\_2per\_1\_5  
0\_3

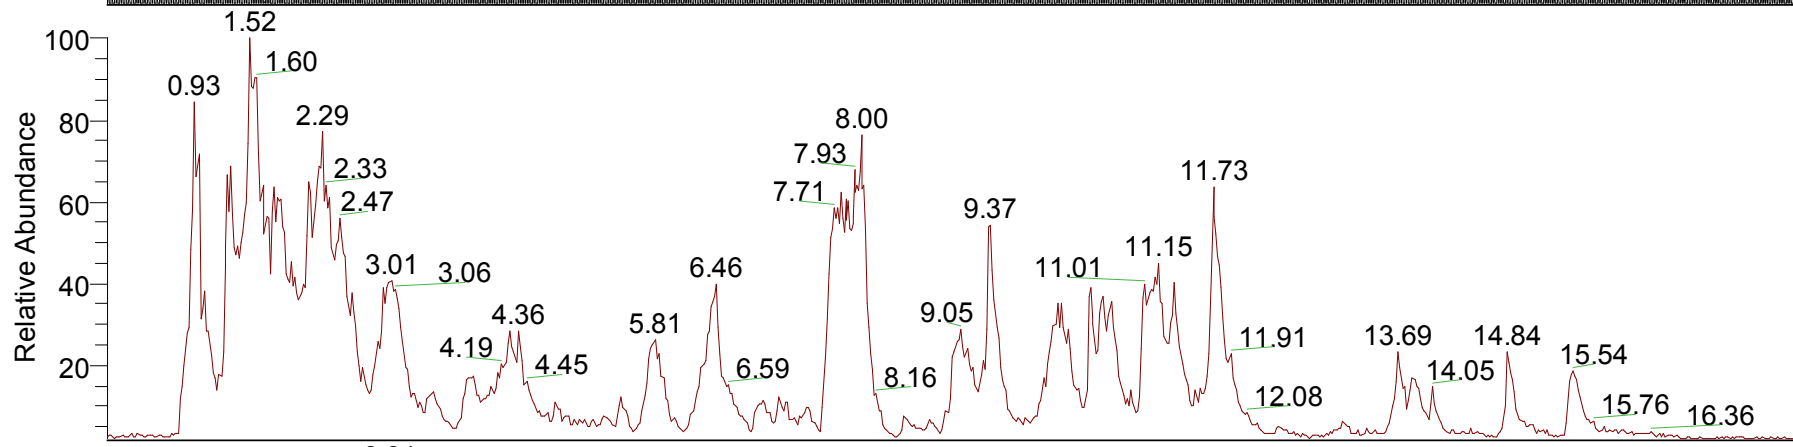

NL:  
5.78E9  
m/z=  
120.00-2000.00  
F: Full ms MS  
Hilic\_P\_Junti\_202  
20118\_2per\_1\_5  
0\_3

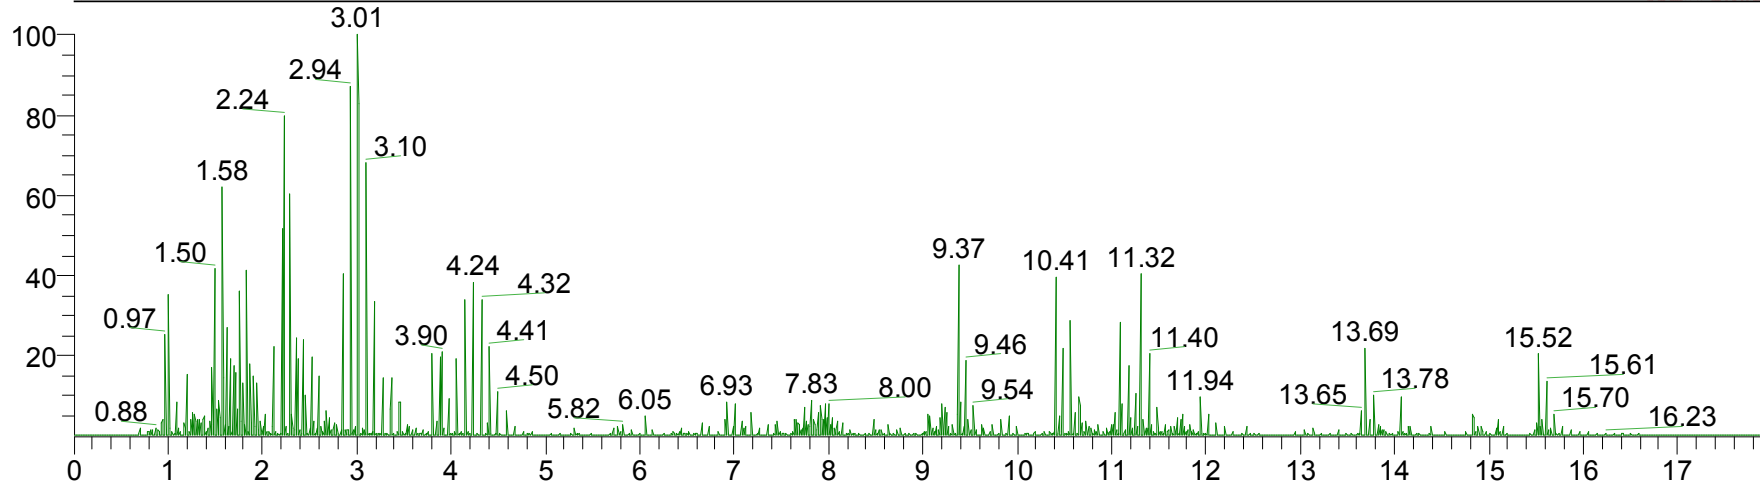

NL:  
2.76E9  
TIC F: Full ms2  
MS  
Hilic\_P\_Junti\_202  
20118\_2per\_1\_5  
0\_3

Time (min)

RT: 0.00 - 17.90

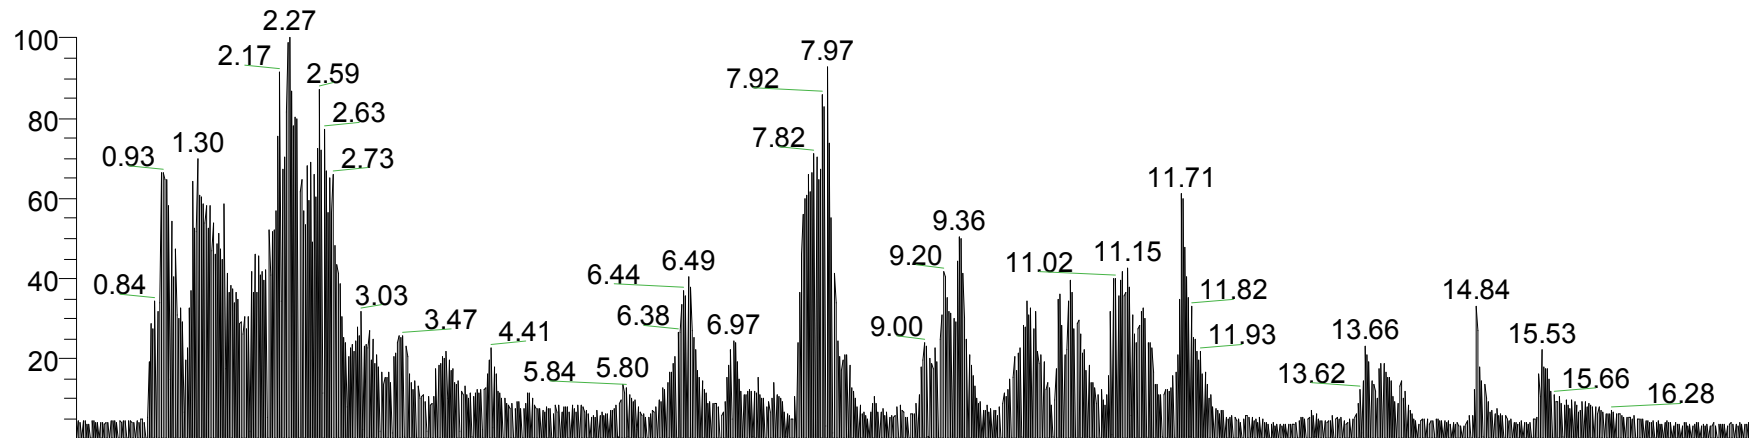

NL:  
5.44E9  
TIC MS  
Hilic\_P\_Junti\_202  
20118\_2per\_1\_5  
0\_4

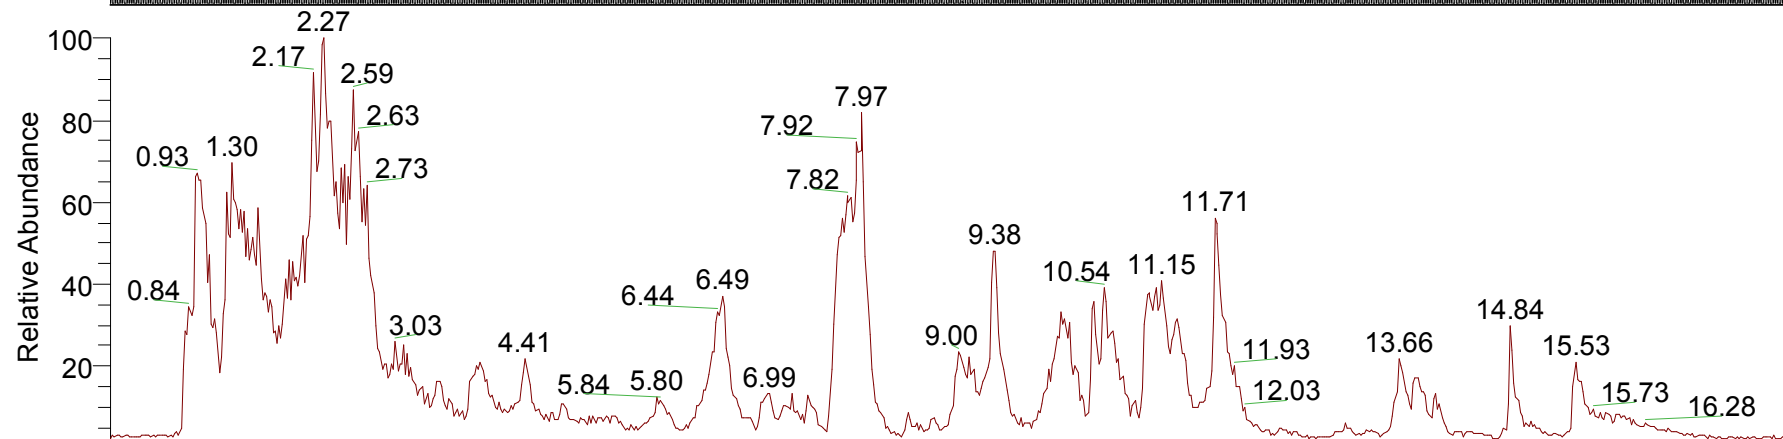

NL:  
5.21E9  
m/z=  
120.00-2000.00  
F: Full ms MS  
Hilic\_P\_Junti\_202  
20118\_2per\_1\_5  
0\_4

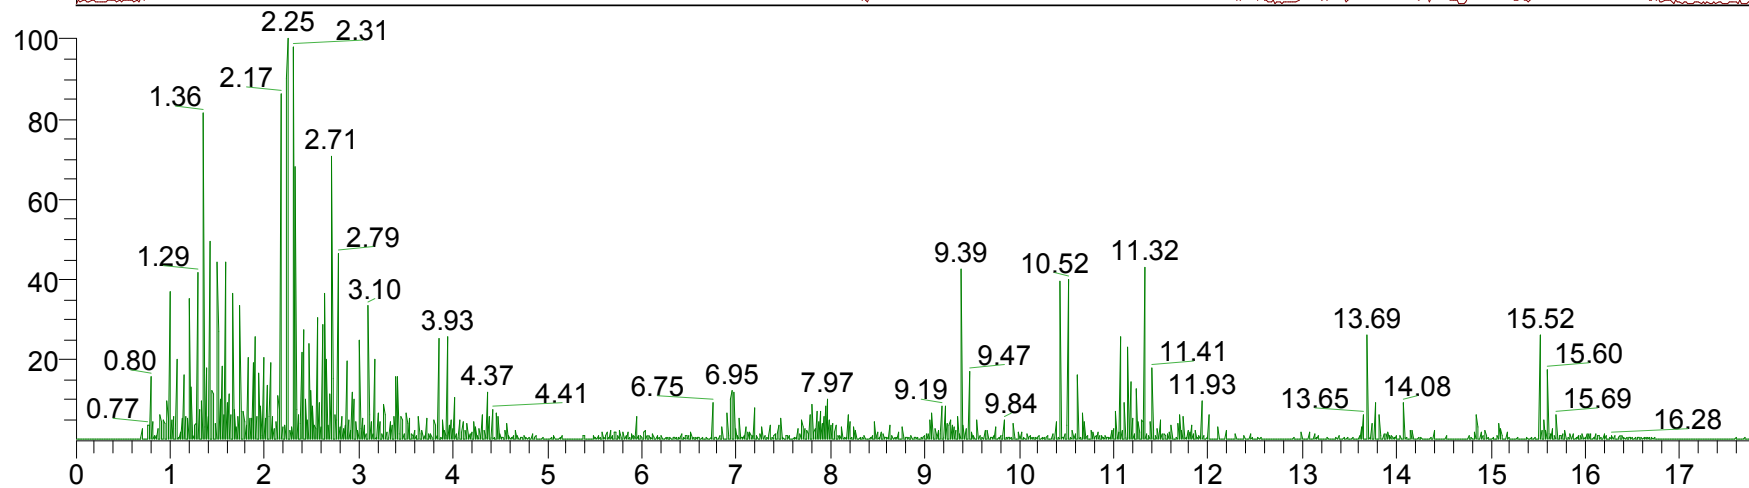

NL:  
2.16E9  
TIC F: Full ms2  
MS  
Hilic\_P\_Junti\_202  
20118\_2per\_1\_5  
0\_4

Time (min)

RT: 0.00 - 17.90

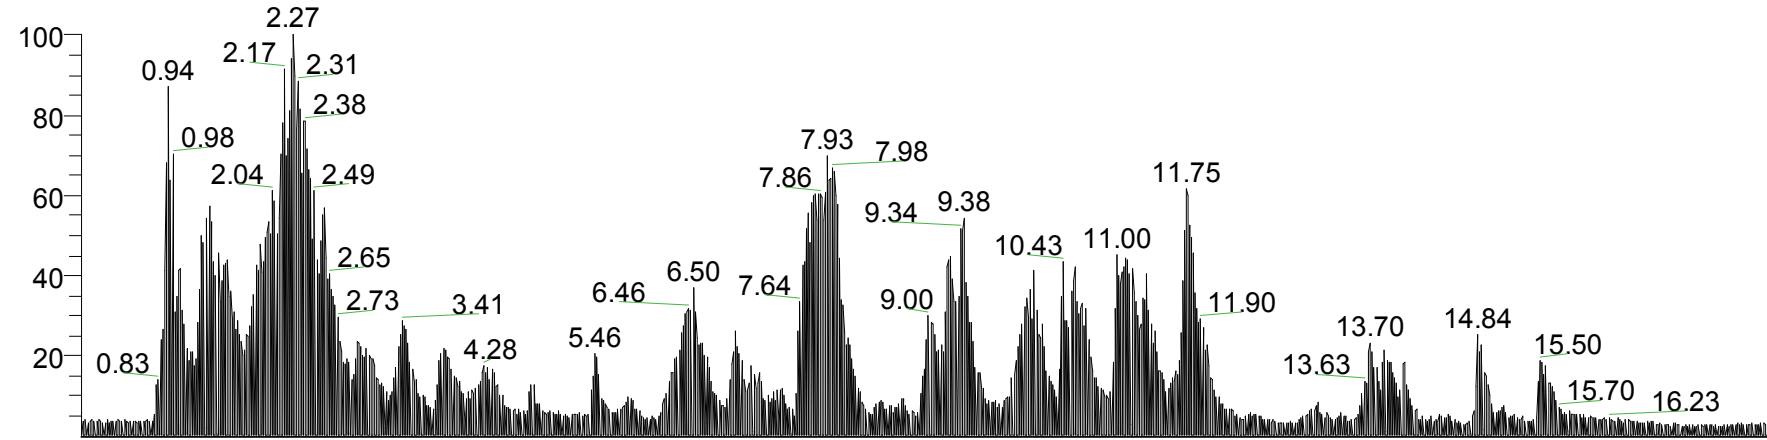

NL: 7.03E9  
TIC MS  
Hilic\_P\_Junti\_202  
20118\_2per\_1\_50  
0\_1

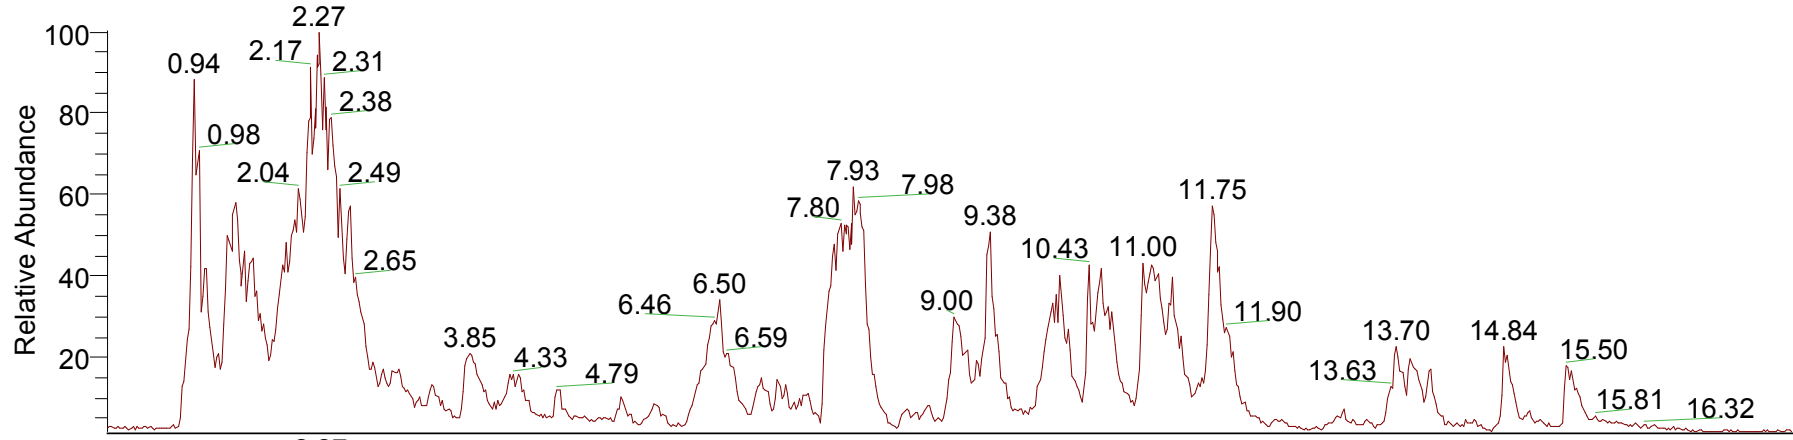

NL: 6.73E9  
m/z=  
120.00-2000.00  
F: Full ms MS  
Hilic\_P\_Junti\_202  
20118\_2per\_1\_50  
0\_1

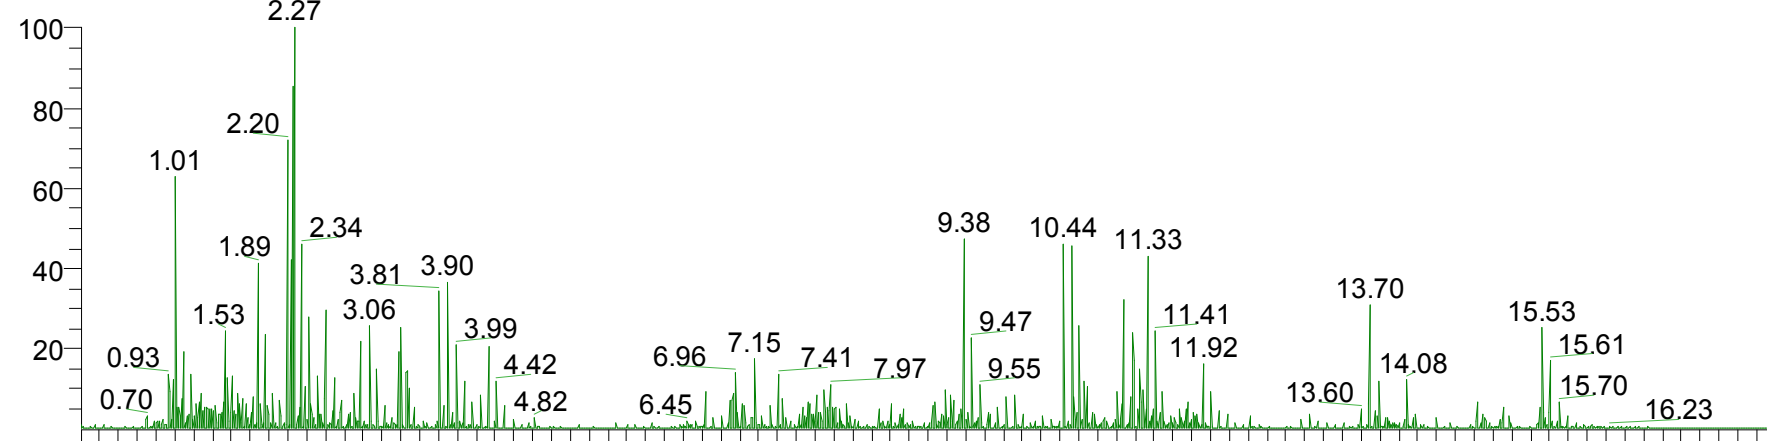

NL: 2.47E9  
TIC F: Full ms2  
MS  
Hilic\_P\_Junti\_202  
20118\_2per\_1\_50  
0\_1

Time (min)

RT: 0.00 - 17.90

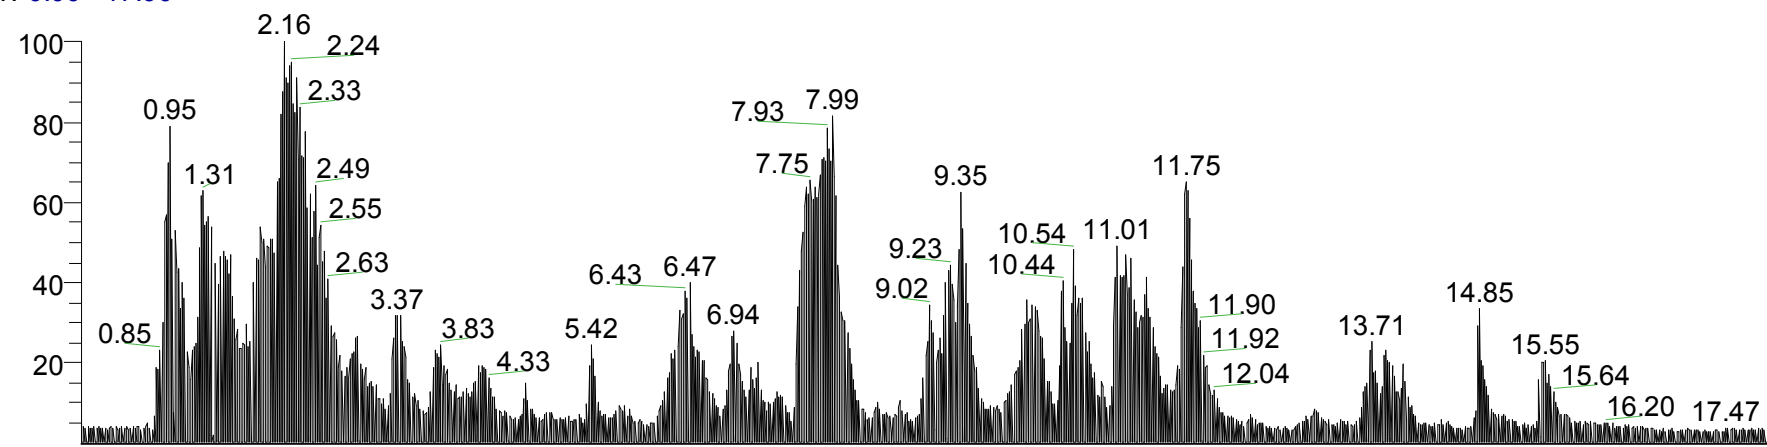

NL: 6.27E9  
TIC MS  
Hilic\_P\_Junti\_202  
20118\_2per\_1\_50  
0\_2

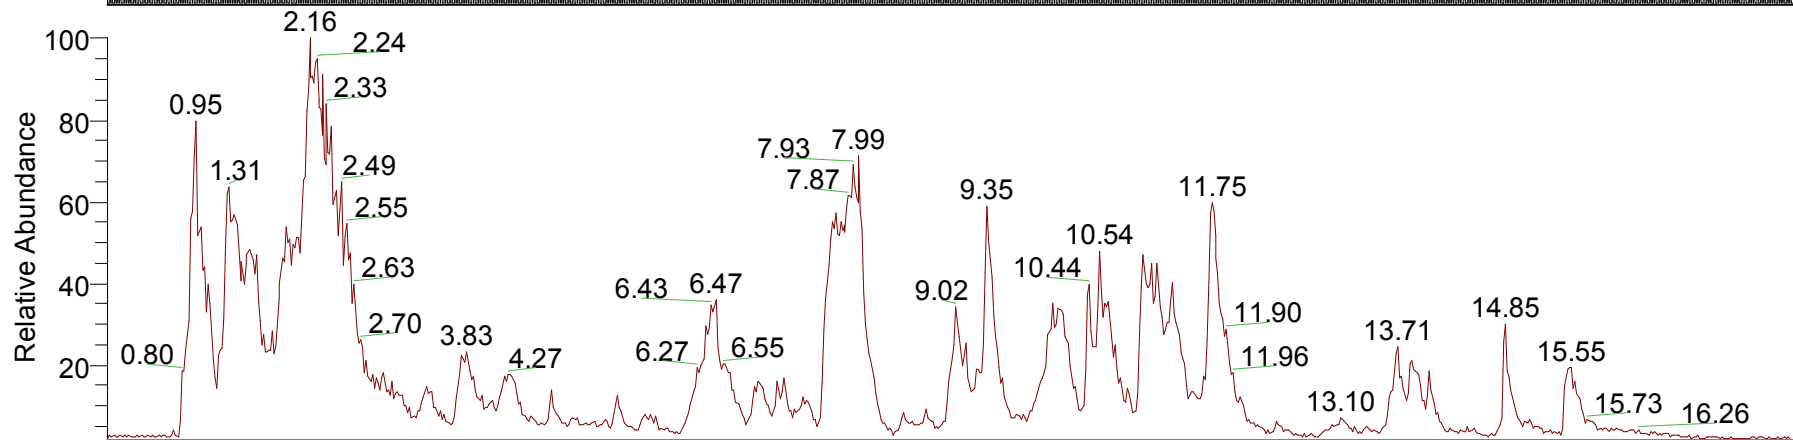

NL: 5.99E9  
m/z=  
120.00-2000.00  
F: Full ms MS  
Hilic\_P\_Junti\_202  
20118\_2per\_1\_50  
0\_2

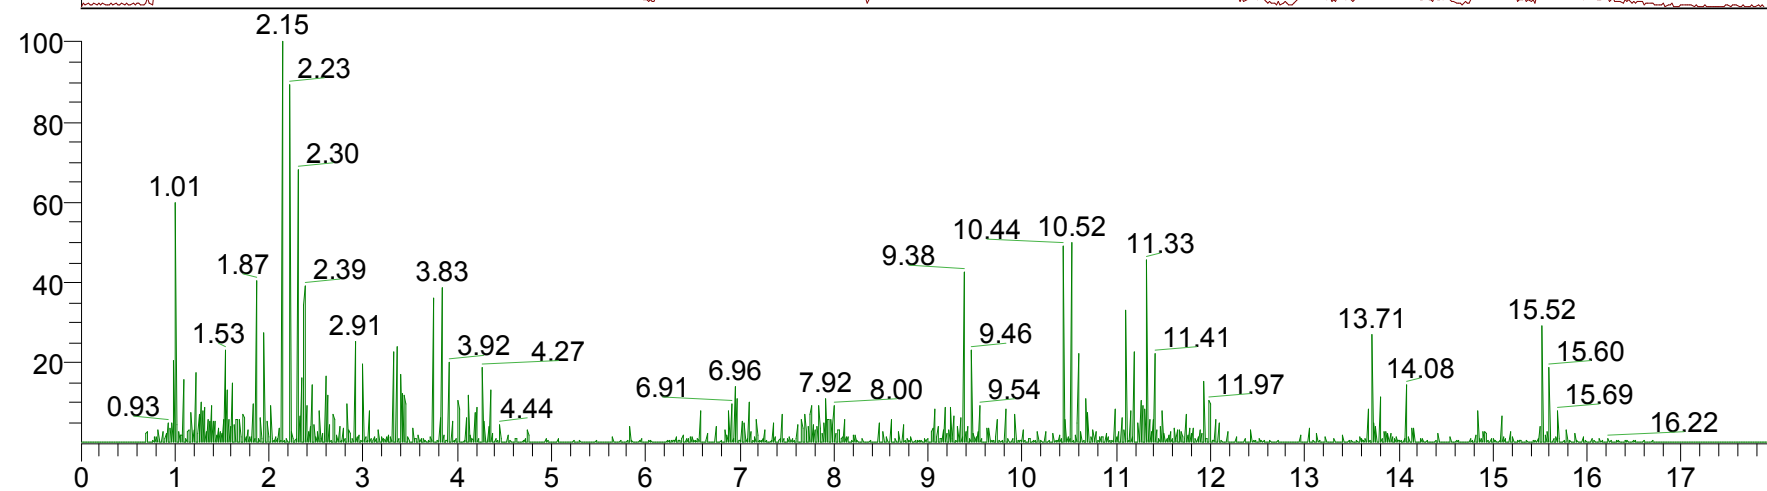

NL: 2.32E9  
TIC F: Full ms2  
MS  
Hilic\_P\_Junti\_202  
20118\_2per\_1\_50  
0\_2

Time (min)

RT: 0.00 - 17.90

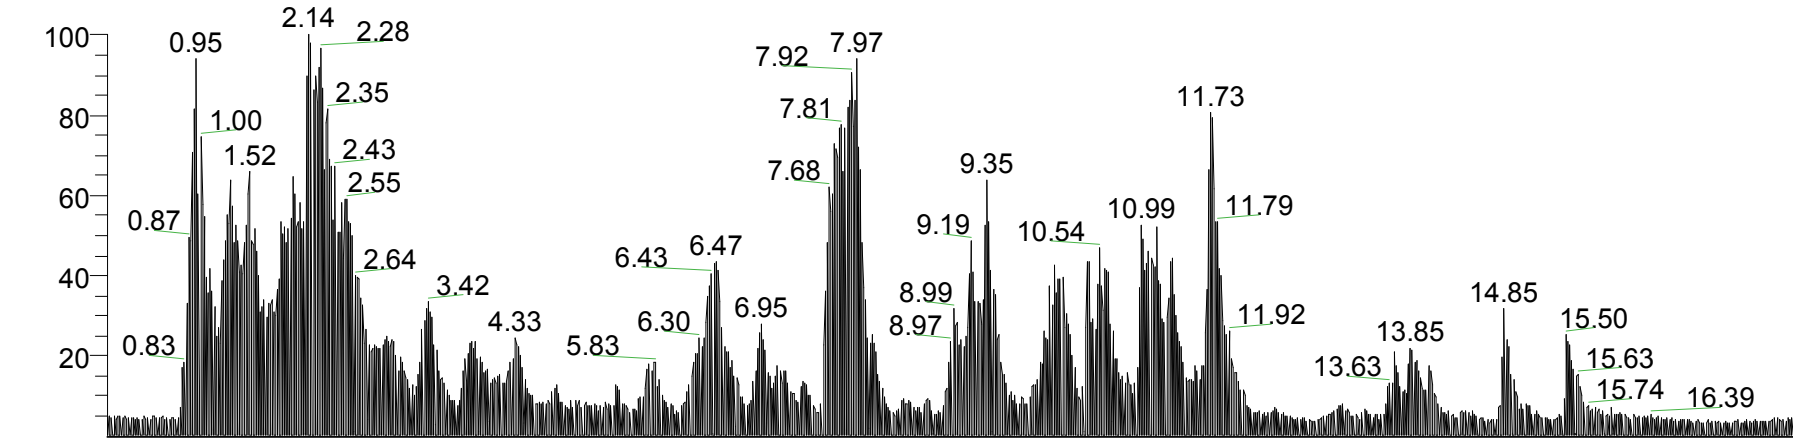

NL: 5.25E9  
TIC MS  
Hilic\_P\_Junti\_202  
20118\_2per\_1\_50  
0\_3

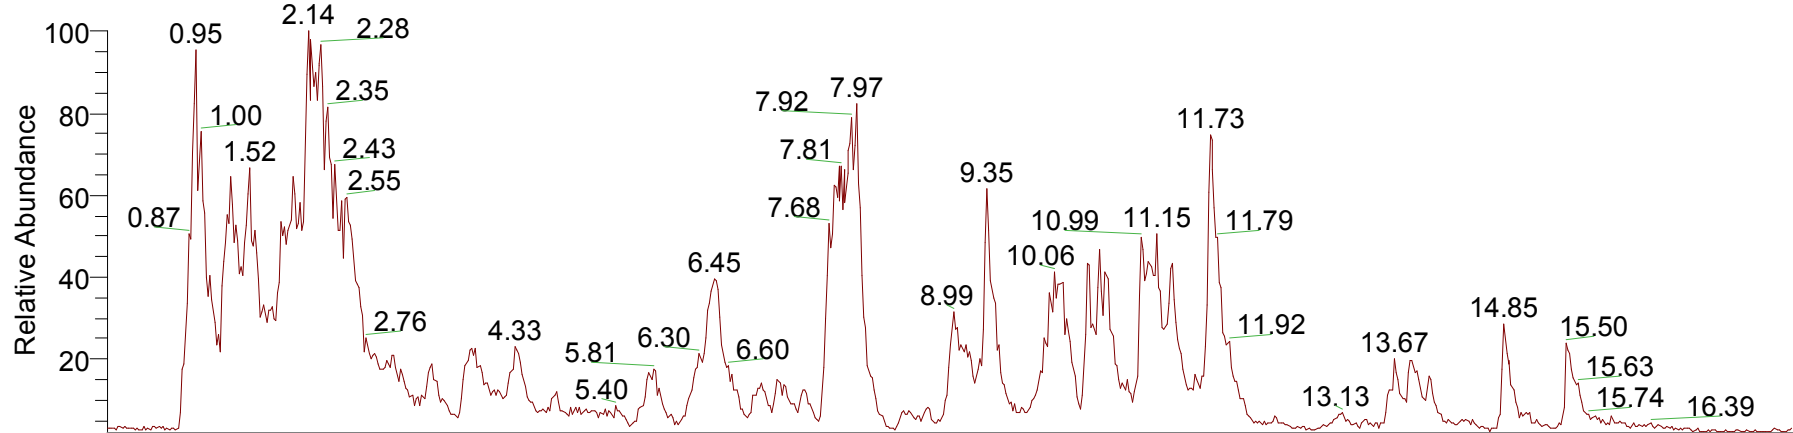

NL: 5.01E9  
m/z=  
120.00-2000.00  
F: Full ms MS  
Hilic\_P\_Junti\_202  
20118\_2per\_1\_50  
0\_3

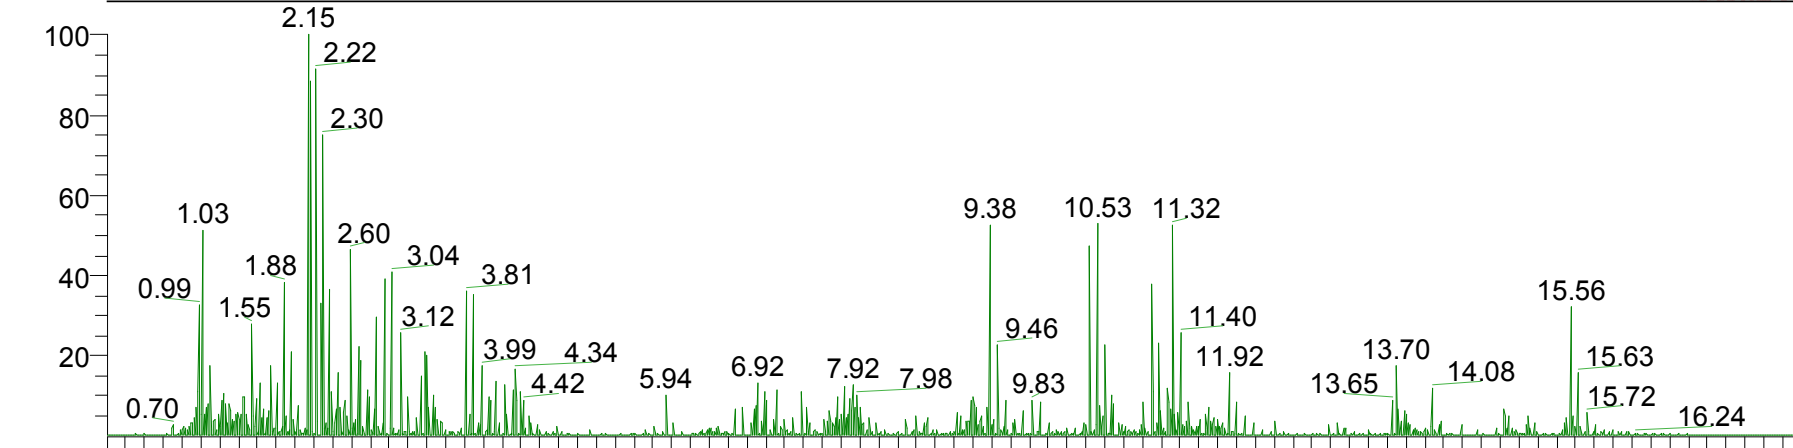

NL: 1.95E9  
TIC F: Full ms2  
MS  
Hilic\_P\_Junti\_202  
20118\_2per\_1\_50  
0\_3

Time (min)

RT: 0.00 - 17.91

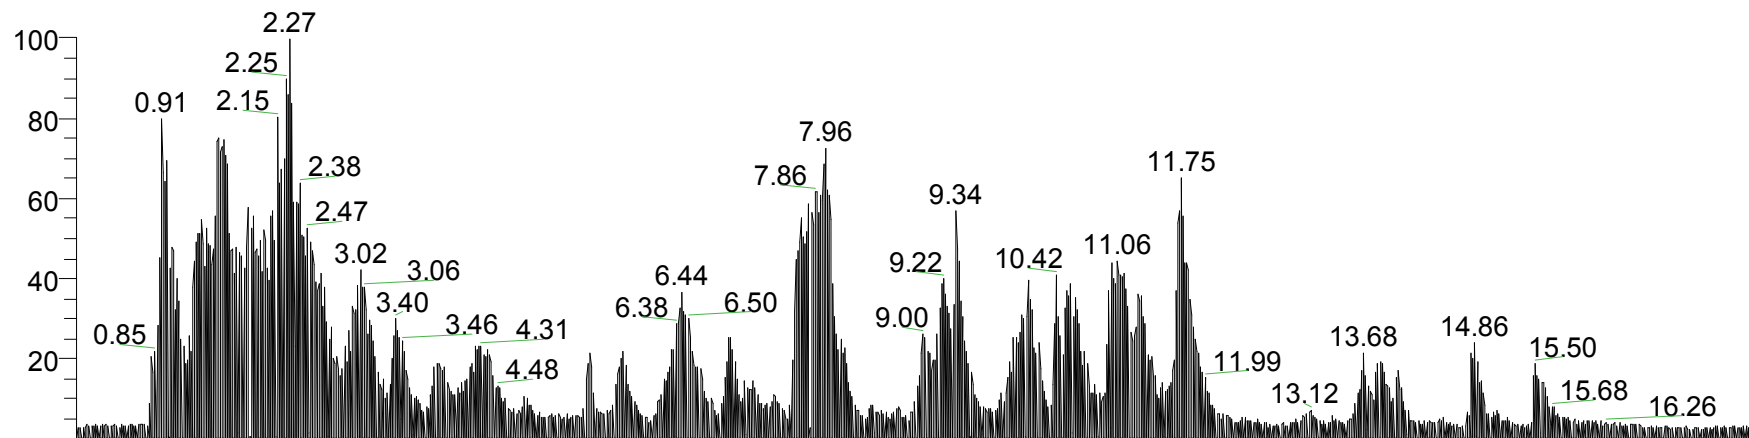

NL: 7.10E9  
TIC MS  
Hilic\_P\_Junti\_202  
20118\_2per\_1\_50  
0\_4

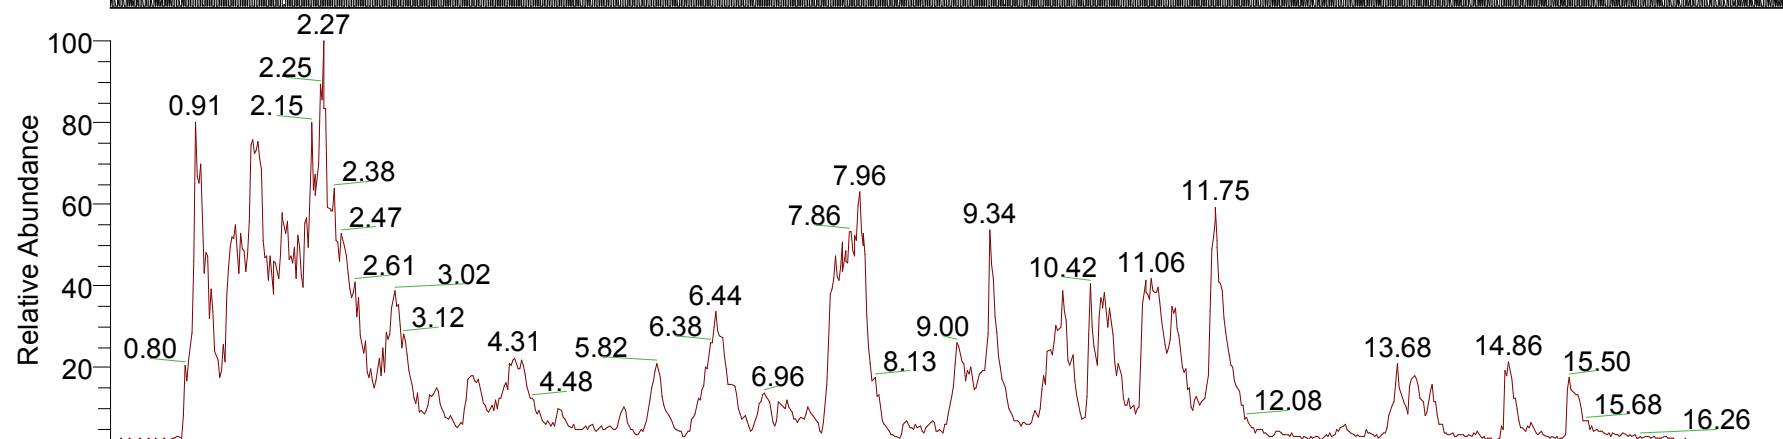

NL: 6.81E9  
m/z=  
120.00-2000.00  
F: Full ms MS  
Hilic\_P\_Junti\_202  
20118\_2per\_1\_50  
0\_4

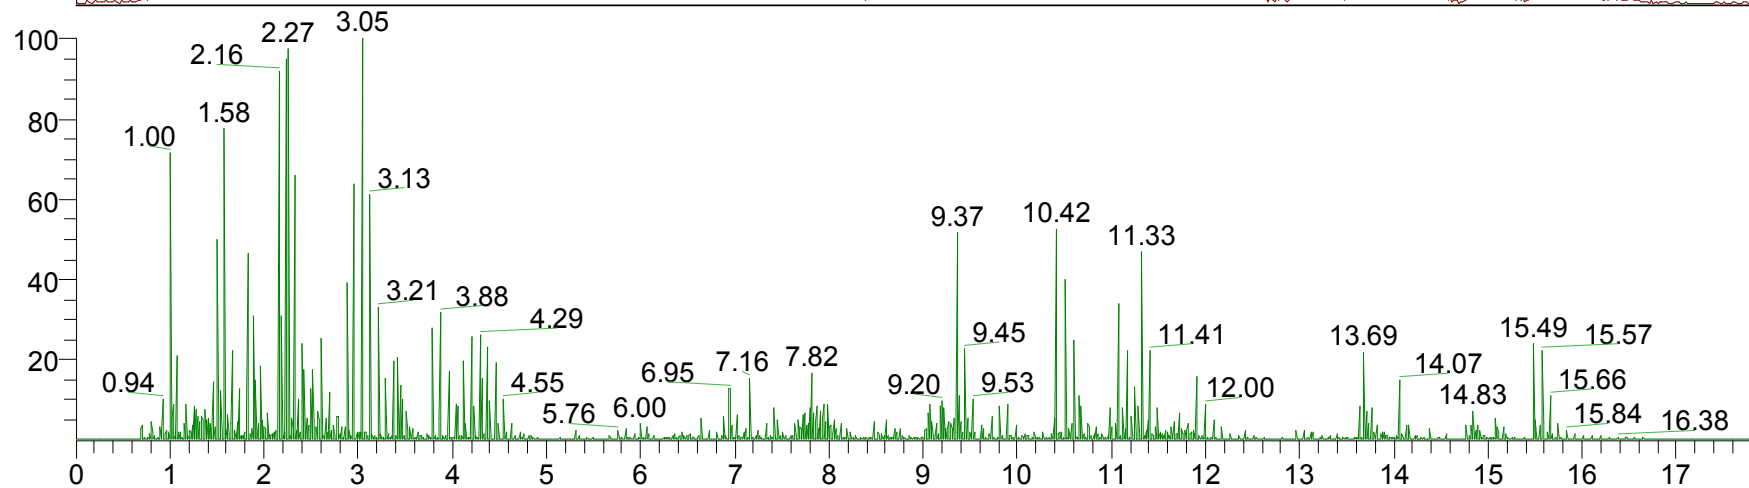

NL: 2.49E9  
TIC F: Full ms2  
MS  
Hilic\_P\_Junti\_202  
20118\_2per\_1\_50  
0\_4

Time (min)

RT: 0.00 - 17.90

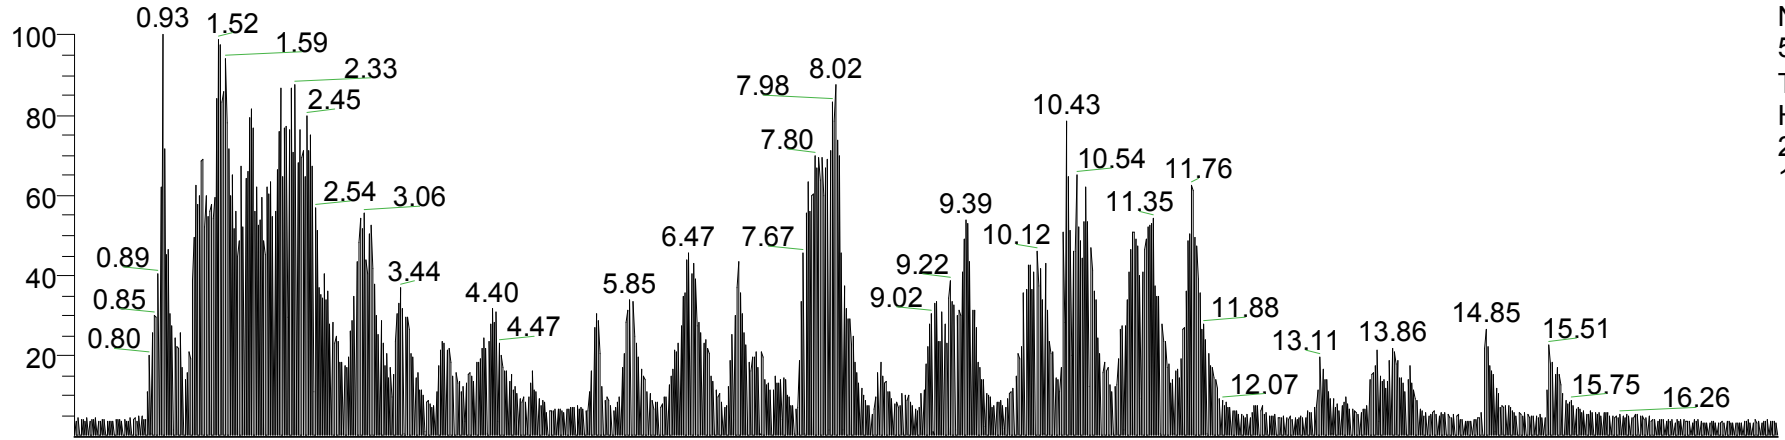

NL:  
5.89E9  
TIC MS  
Hilic\_P\_Junti\_20  
220118\_2per\_M  
1

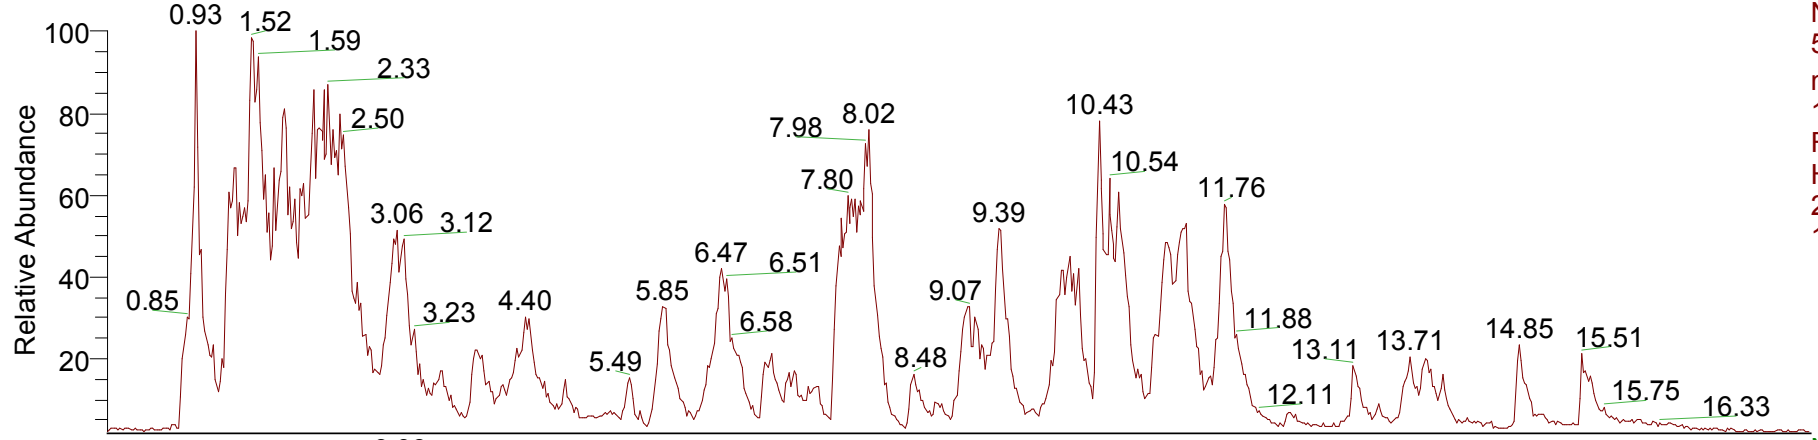

NL:  
5.69E9  
m/z=  
120.00-2000.00  
F: Full ms MS  
Hilic\_P\_Junti\_20  
220118\_2per\_M  
1

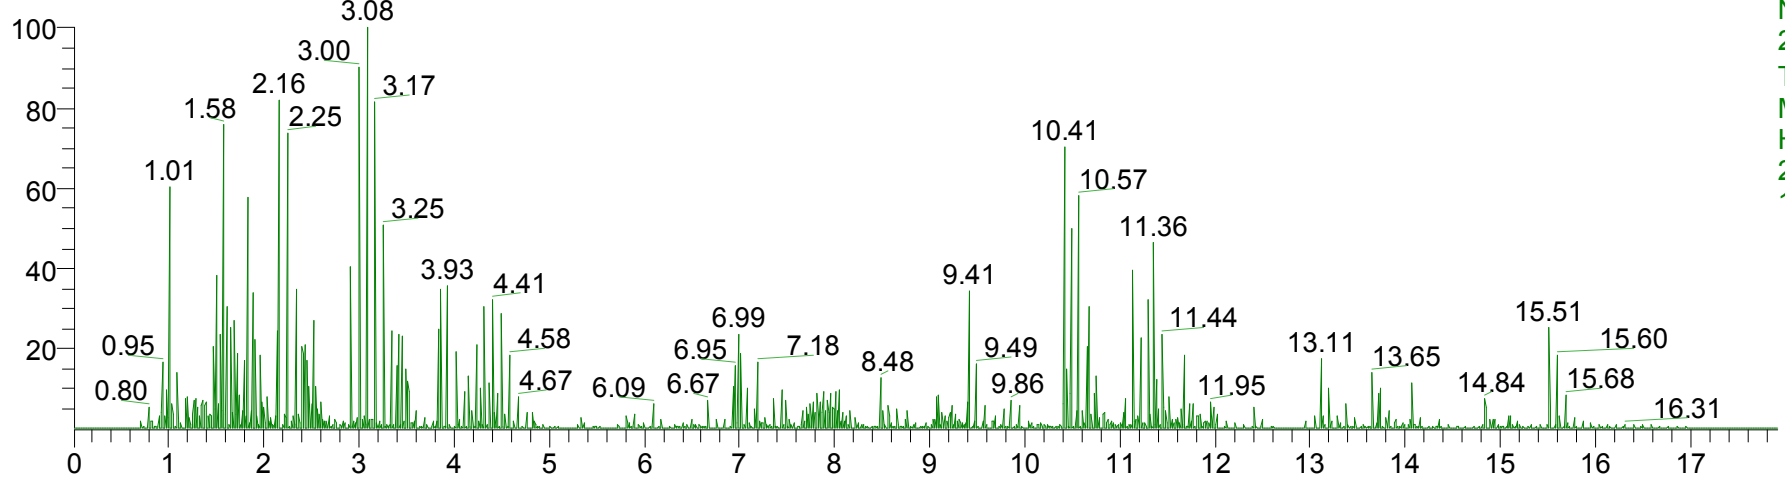

NL:  
2.37E9  
TIC F: Full ms2  
MS  
Hilic\_P\_Junti\_20  
220118\_2per\_M  
1

Time (min)



RT: 0.00 - 17.90

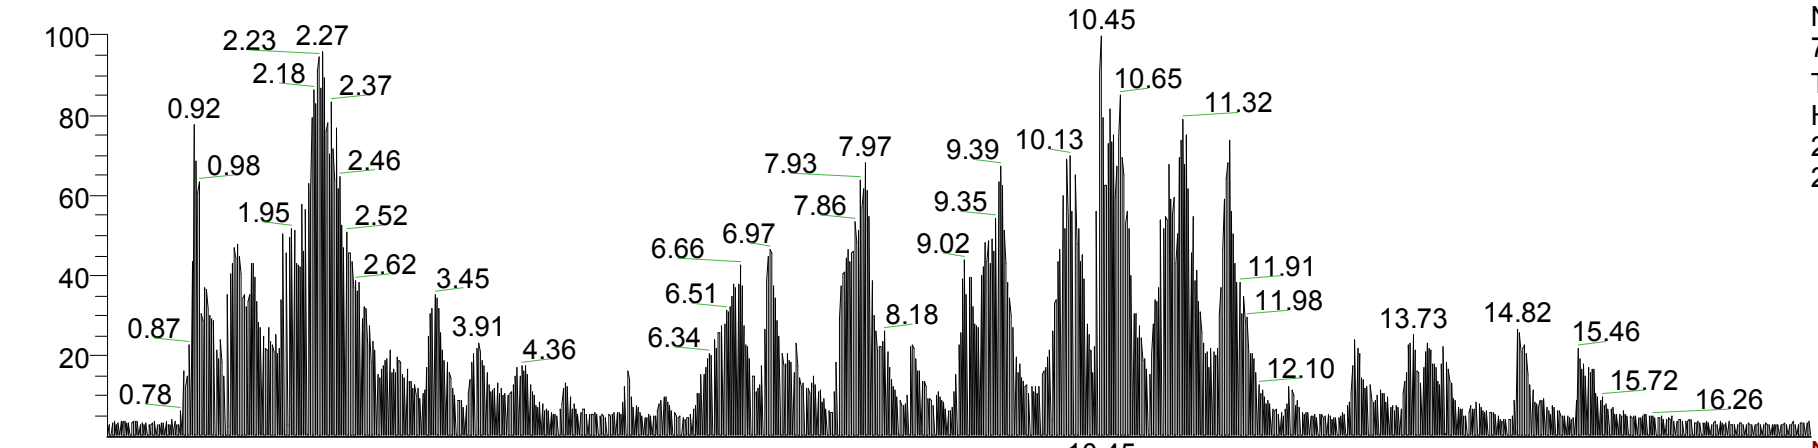

NL:  
7.26E9  
TIC MS  
Hilic\_P\_Junti\_20  
220118\_2per\_M  
2

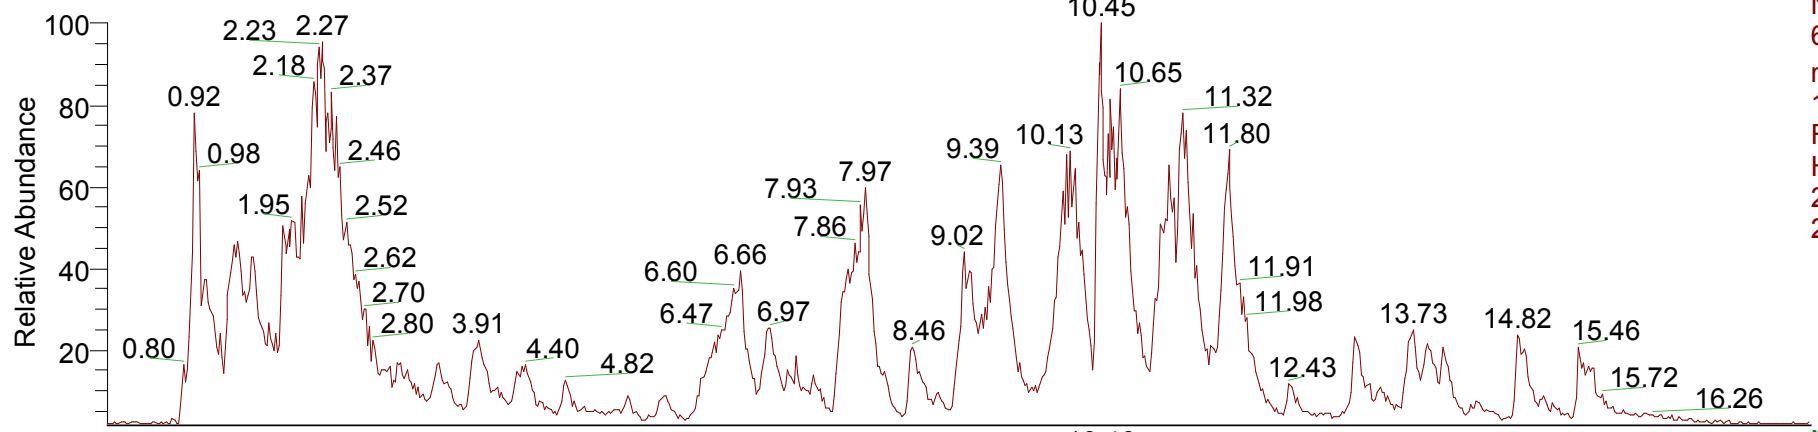

NL:  
6.97E9  
m/z=  
120.00-2000.00  
F: Full ms MS  
Hilic\_P\_Junti\_20  
220118\_2per\_M  
2

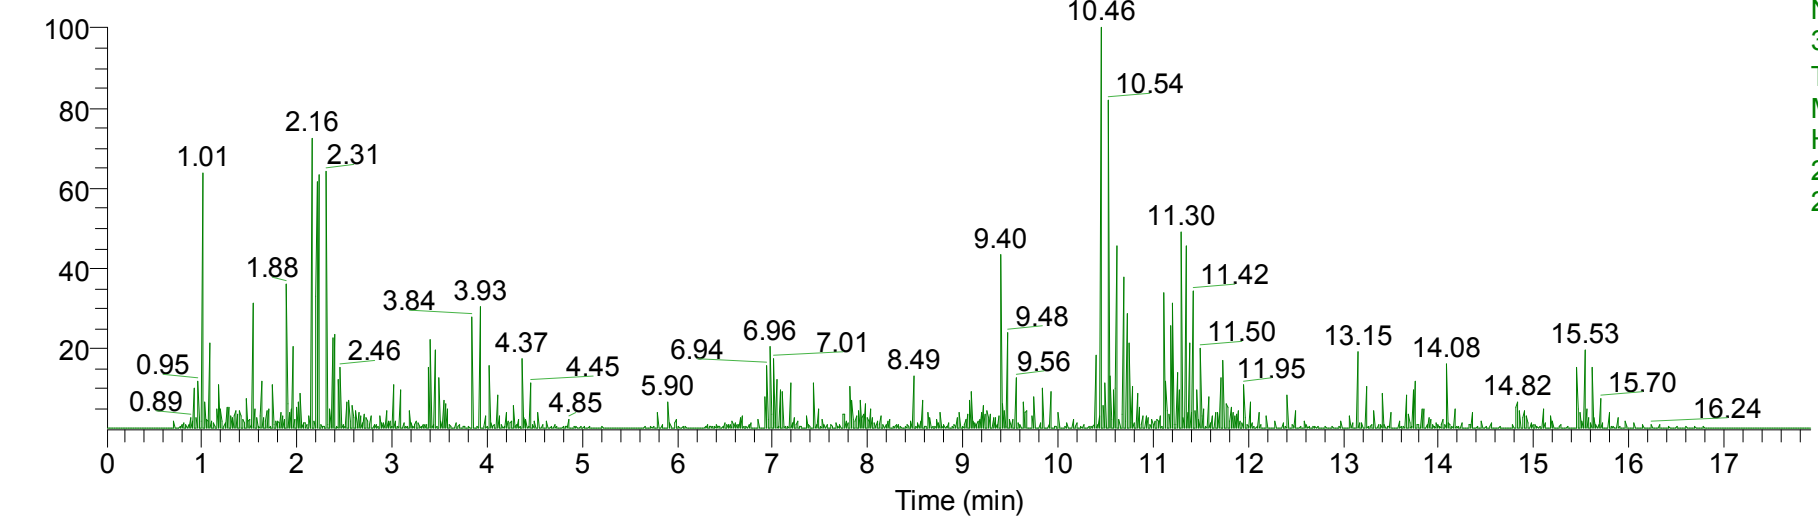

NL:  
3.27E9  
TIC F: Full ms2  
MS  
Hilic\_P\_Junti\_20  
220118\_2per\_M  
2

RT: 0.00 - 17.90

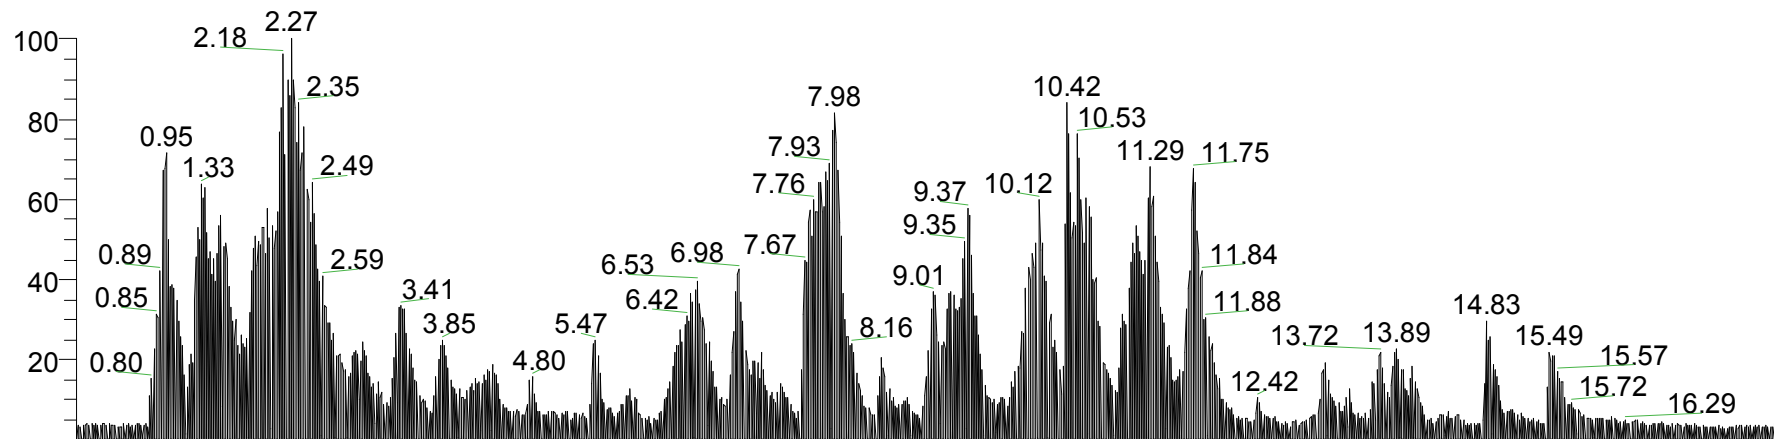

NL:  
6.36E9  
TIC MS  
Hilic\_P\_Junti\_20  
220118\_2per\_M  
3

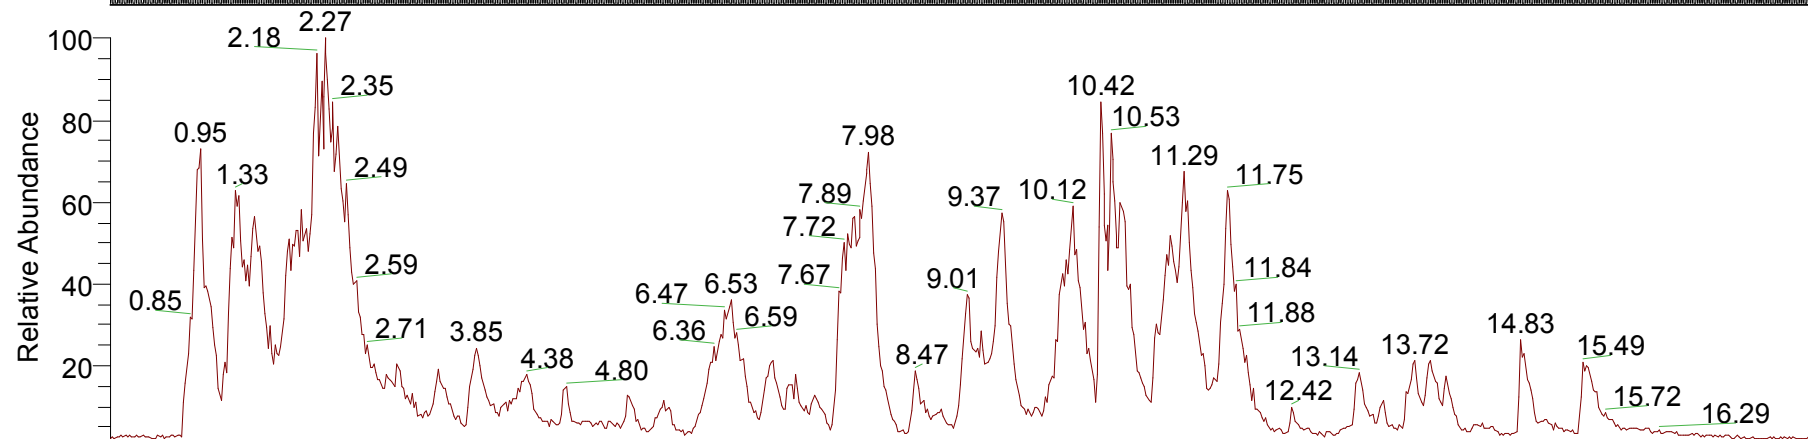

NL:  
6.07E9  
m/z=  
120.00-2000.00  
F: Full ms MS  
Hilic\_P\_Junti\_20  
220118\_2per\_M  
3

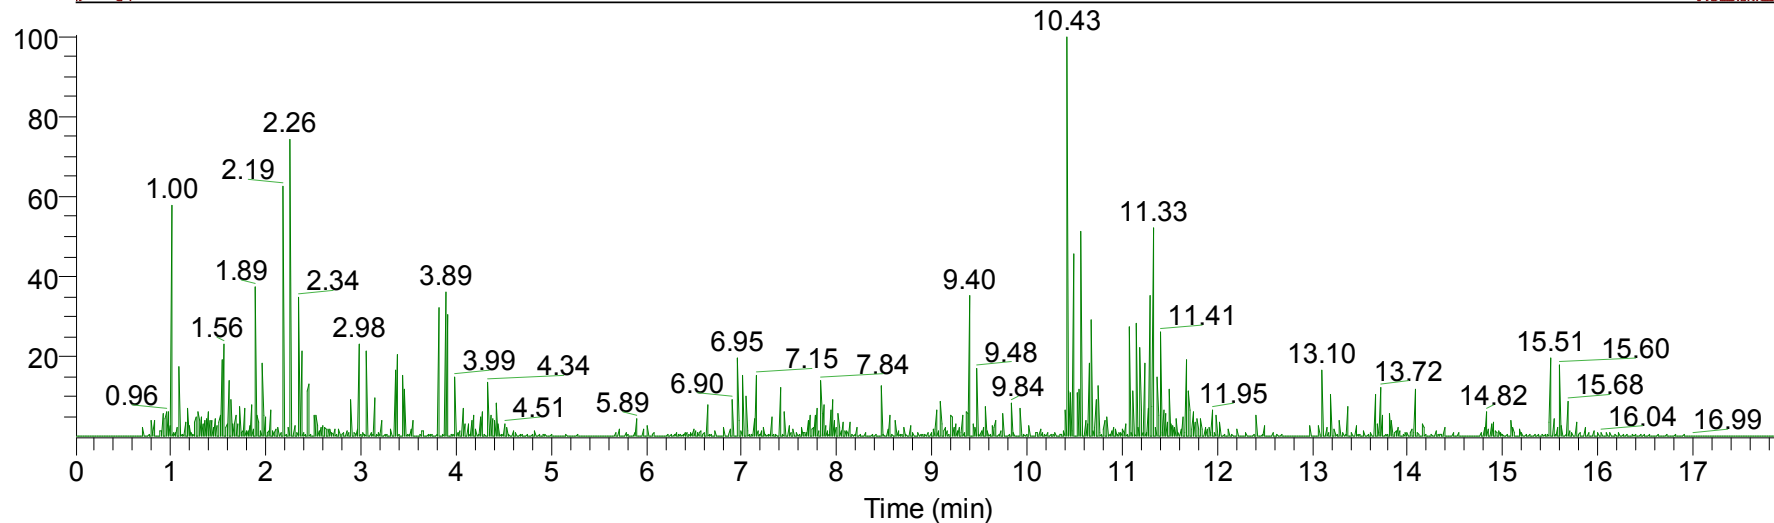

NL:  
2.83E9  
TIC F: Full ms2  
MS  
Hilic\_P\_Junti\_20  
220118\_2per\_M  
3

RT: 0.00 - 17.90

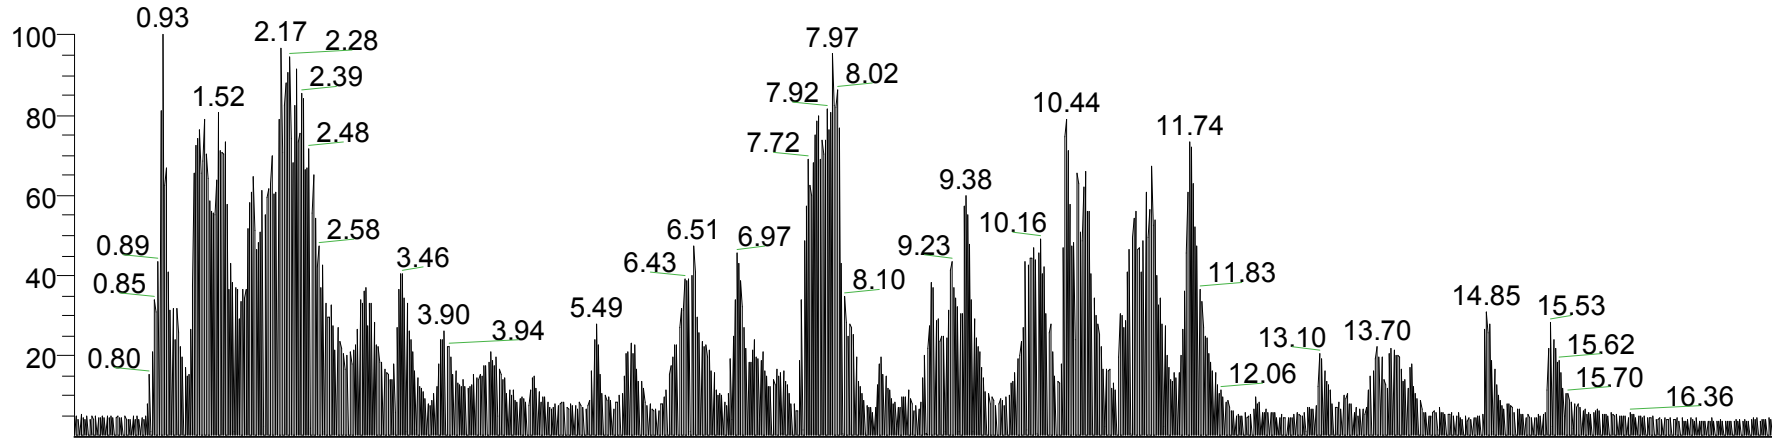

NL:  
5.17E9  
TIC MS  
Hilic\_P\_Junti\_20  
220118\_2per\_M  
4

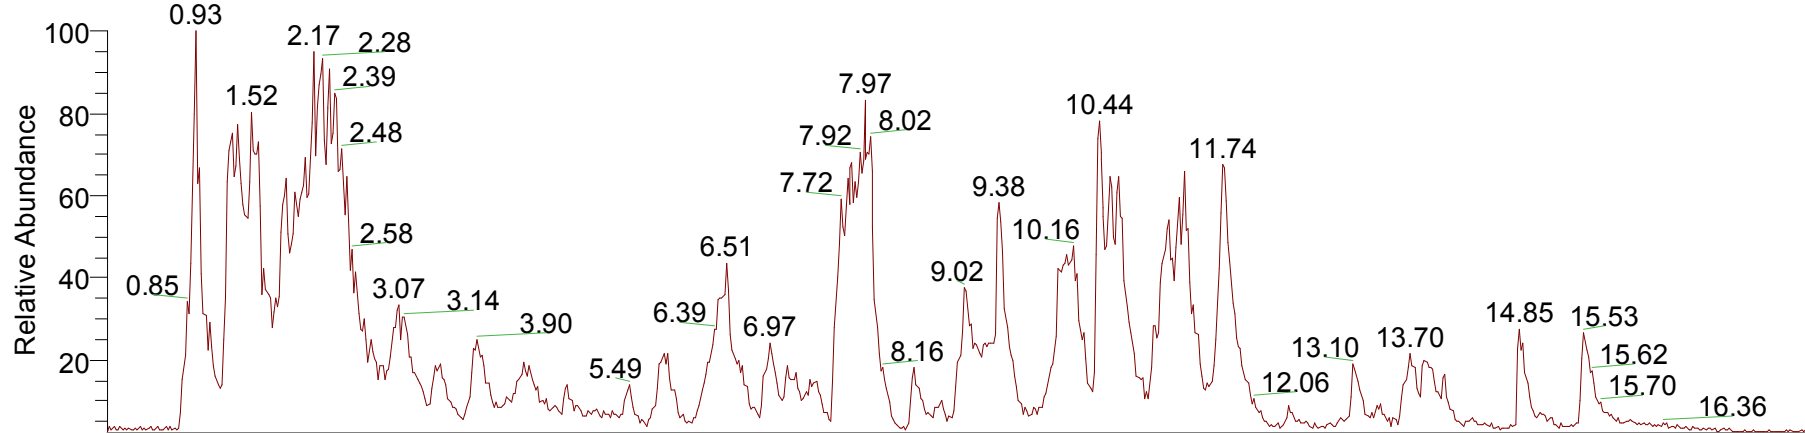

NL:  
4.99E9  
m/z=  
120.00-2000.00  
F: Full ms MS  
Hilic\_P\_Junti\_20  
220118\_2per\_M  
4

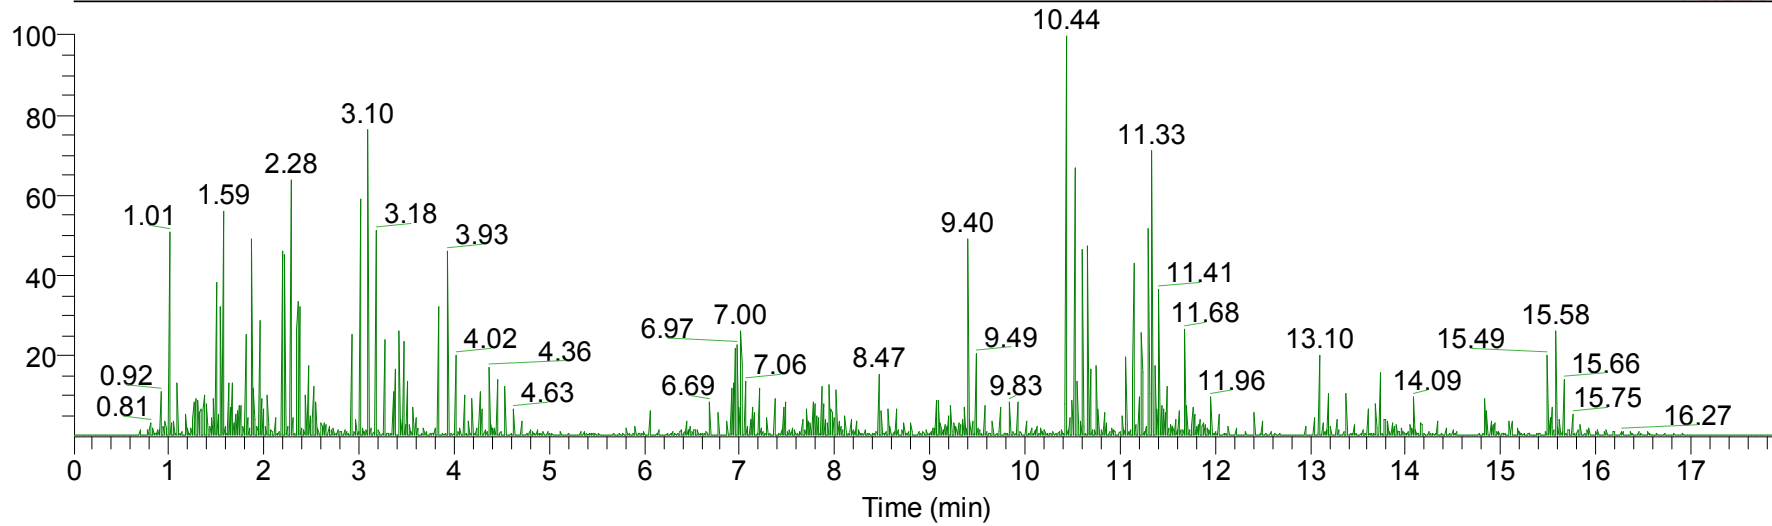

NL:  
1.85E9  
TIC F: Full ms2  
MS  
Hilic\_P\_Junti\_20  
220118\_2per\_M  
4

RT: 0.00 - 17.90

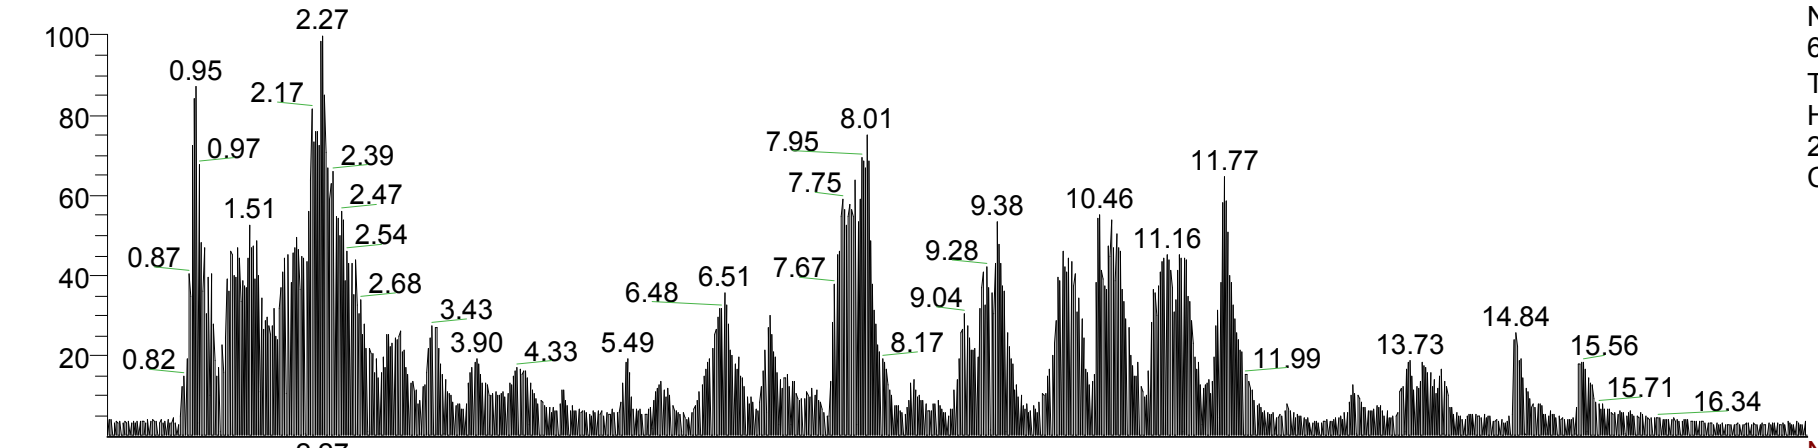

NL:  
6.81E9  
TIC MS  
Hilic\_P\_Junti\_20  
220118\_2per\_Q  
C1

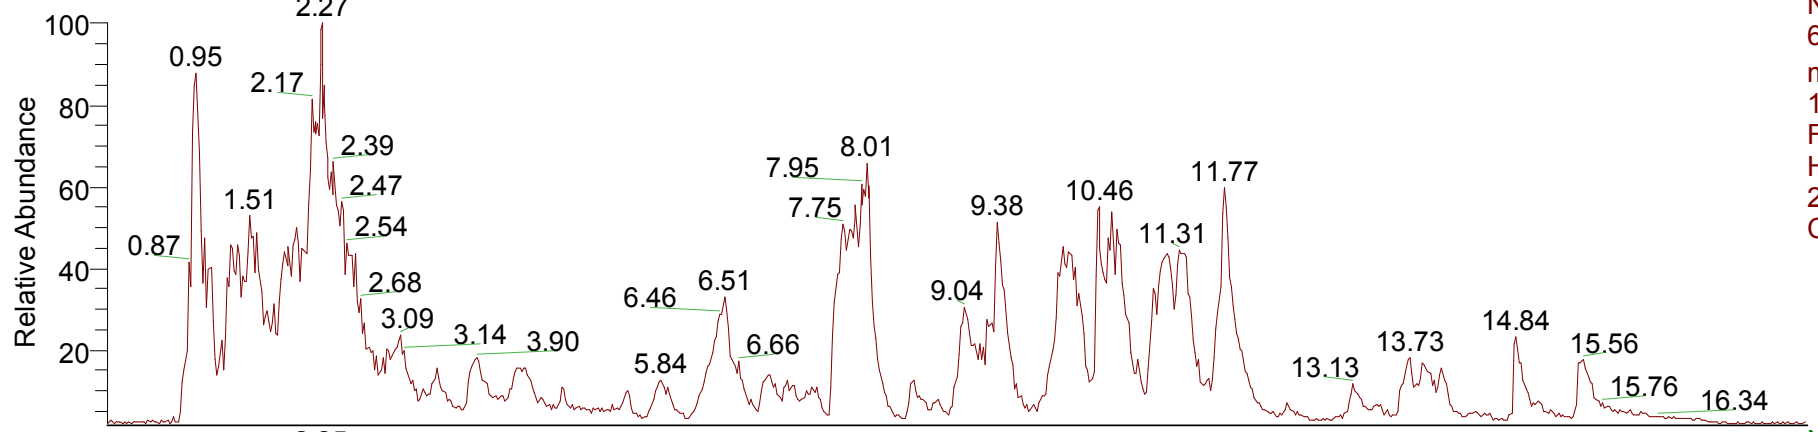

NL:  
6.51E9  
m/z=  
120.00-2000.00  
F: Full ms MS  
Hilic\_P\_Junti\_20  
220118\_2per\_Q  
C1

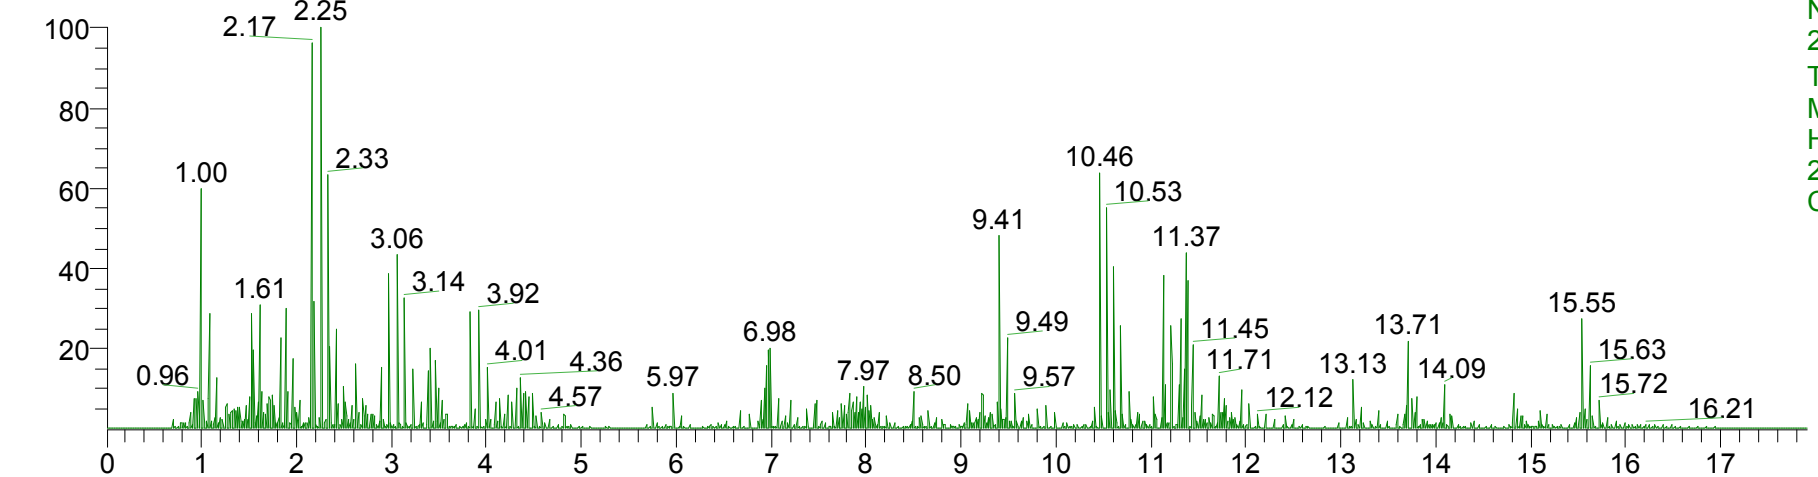

NL:  
2.44E9  
TIC F: Full ms2  
MS  
Hilic\_P\_Junti\_20  
220118\_2per\_Q  
C1

Time (min)

RT: 0.00 - 17.90

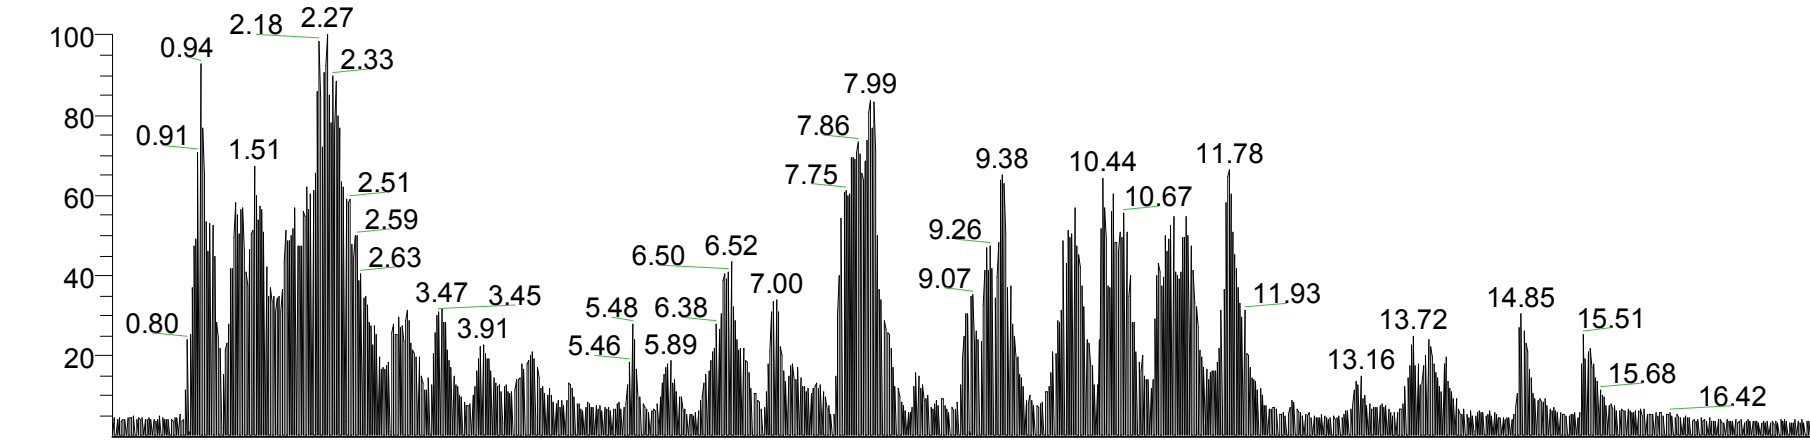

NL:  
5.75E9  
TIC MS  
Hilic\_P\_Junti\_20  
220118\_2per\_Q  
C2

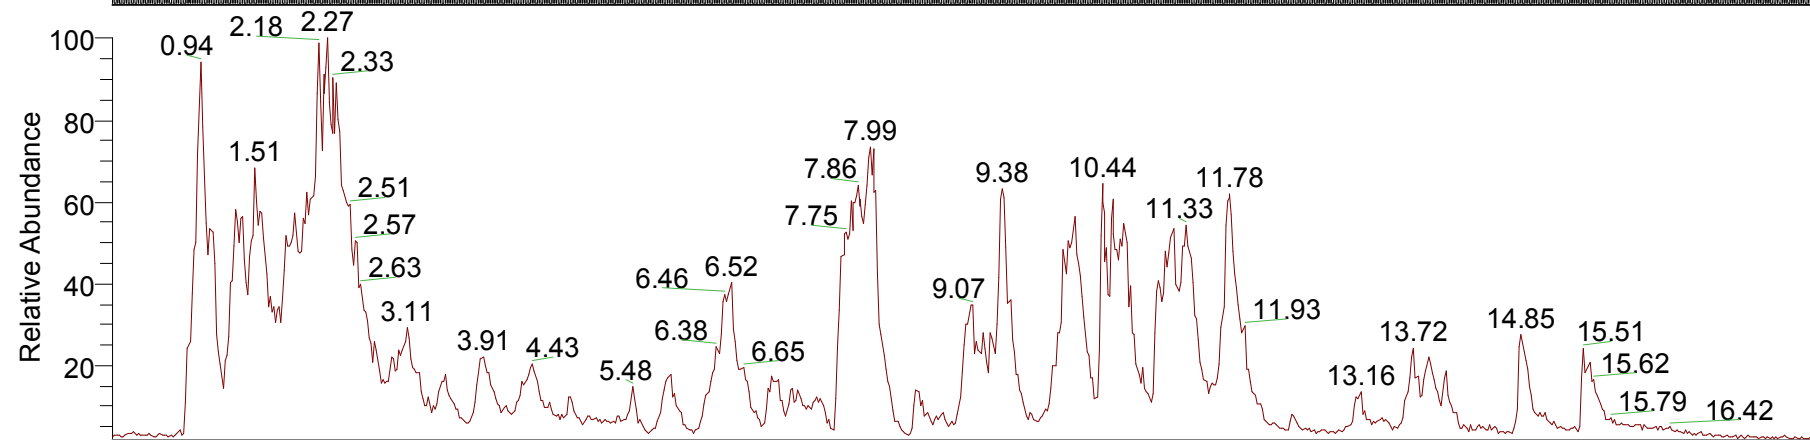

NL:  
5.47E9  
m/z=  
120.00-2000.00  
F: Full ms MS  
Hilic\_P\_Junti\_20  
220118\_2per\_Q  
C2

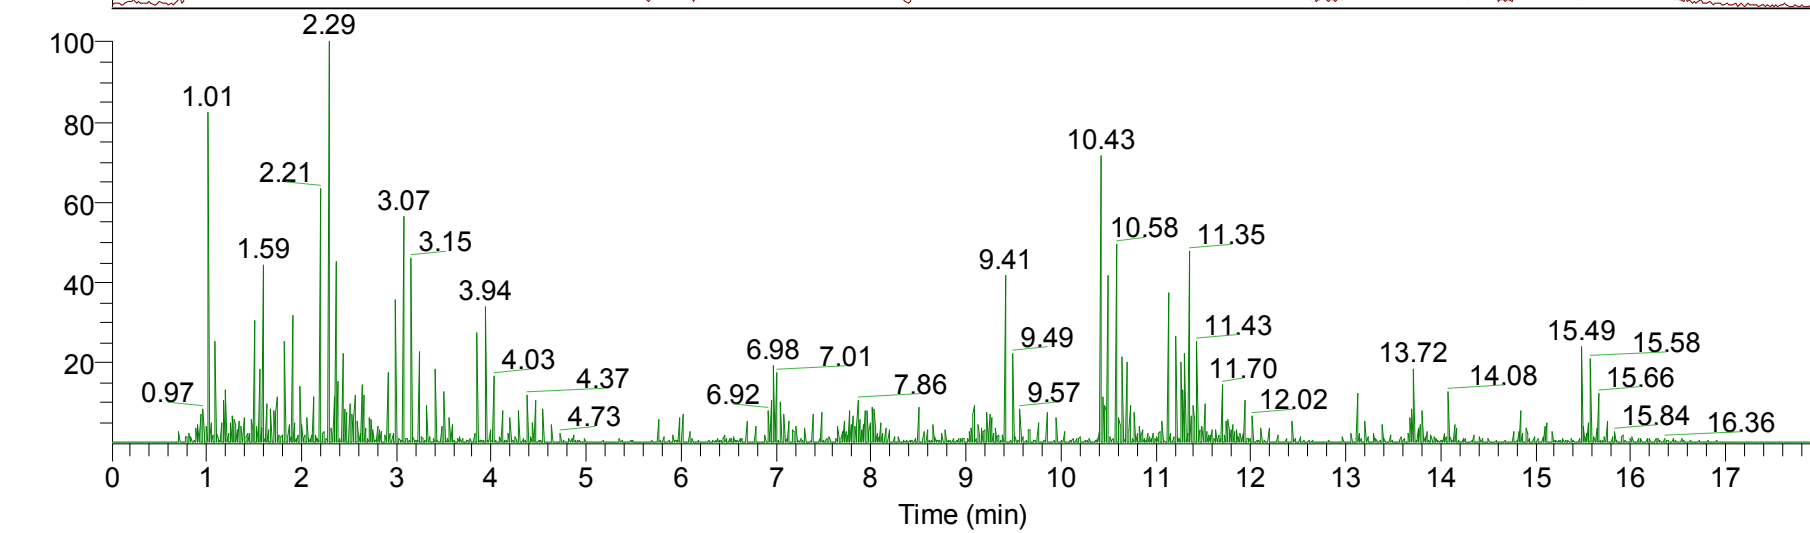

NL:  
2.41E9  
TIC F: Full ms2  
MS  
Hilic\_P\_Junti\_20  
220118\_2per\_Q  
C2

RT: 0.00 - 17.90

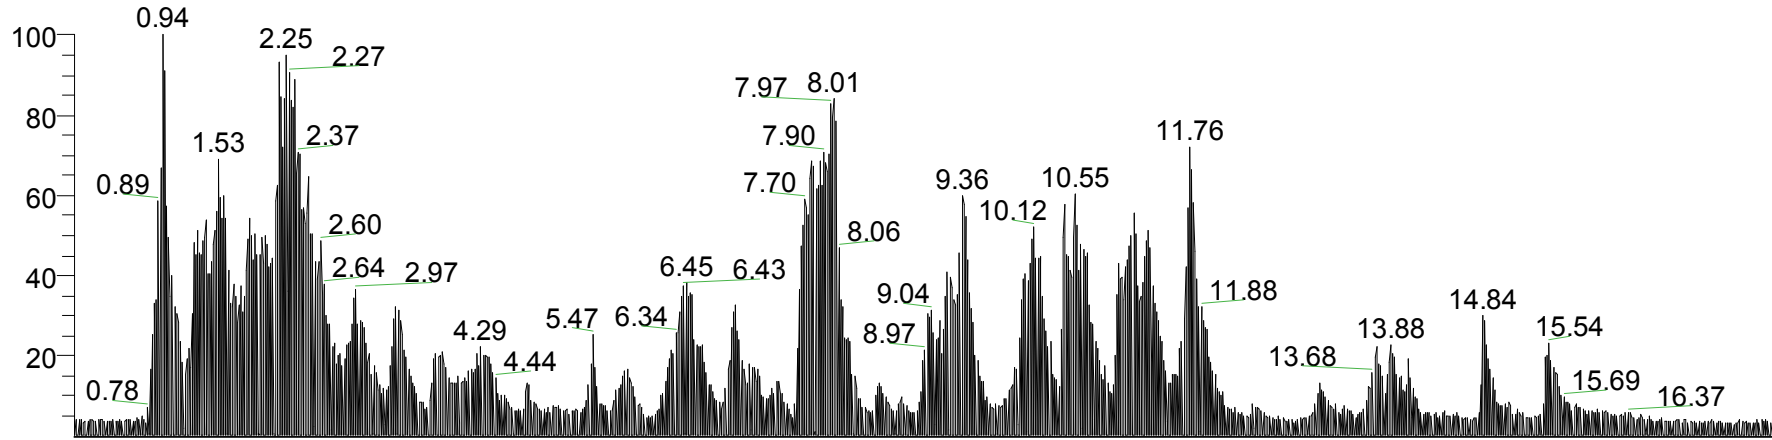

NL:  
6.07E9  
TIC MS  
Hilic\_P\_Junti\_20  
220118\_2per\_Q  
C3

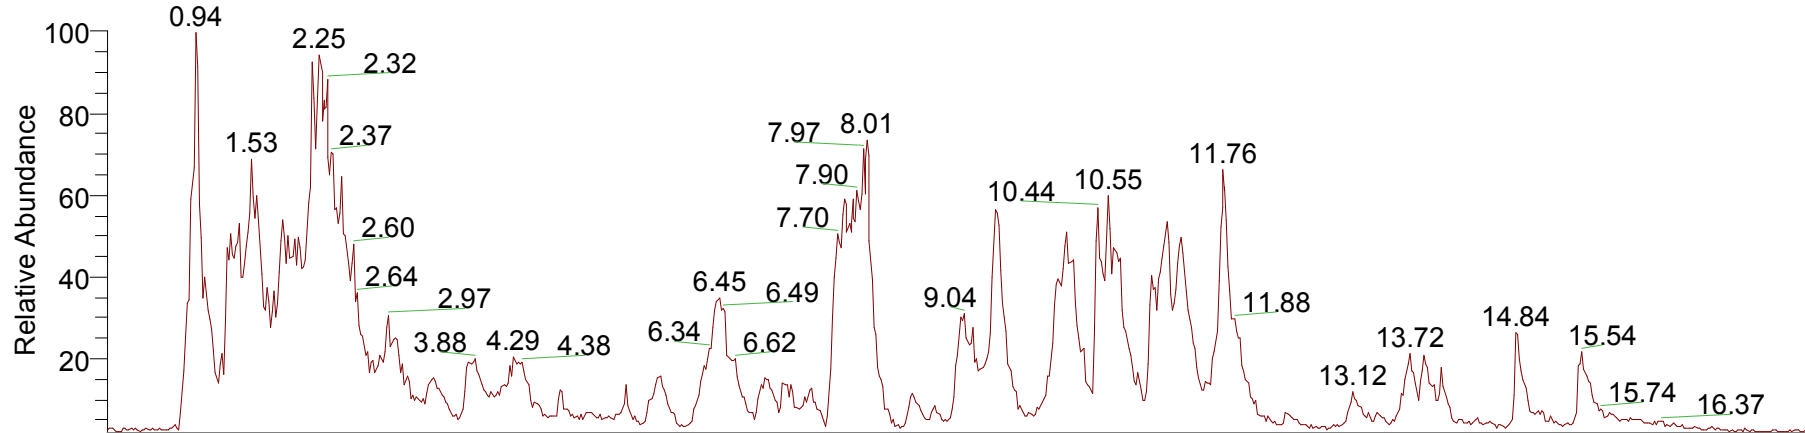

NL:  
5.85E9  
m/z=  
120.00-2000.00  
F: Full ms MS  
Hilic\_P\_Junti\_20  
220118\_2per\_Q  
C3

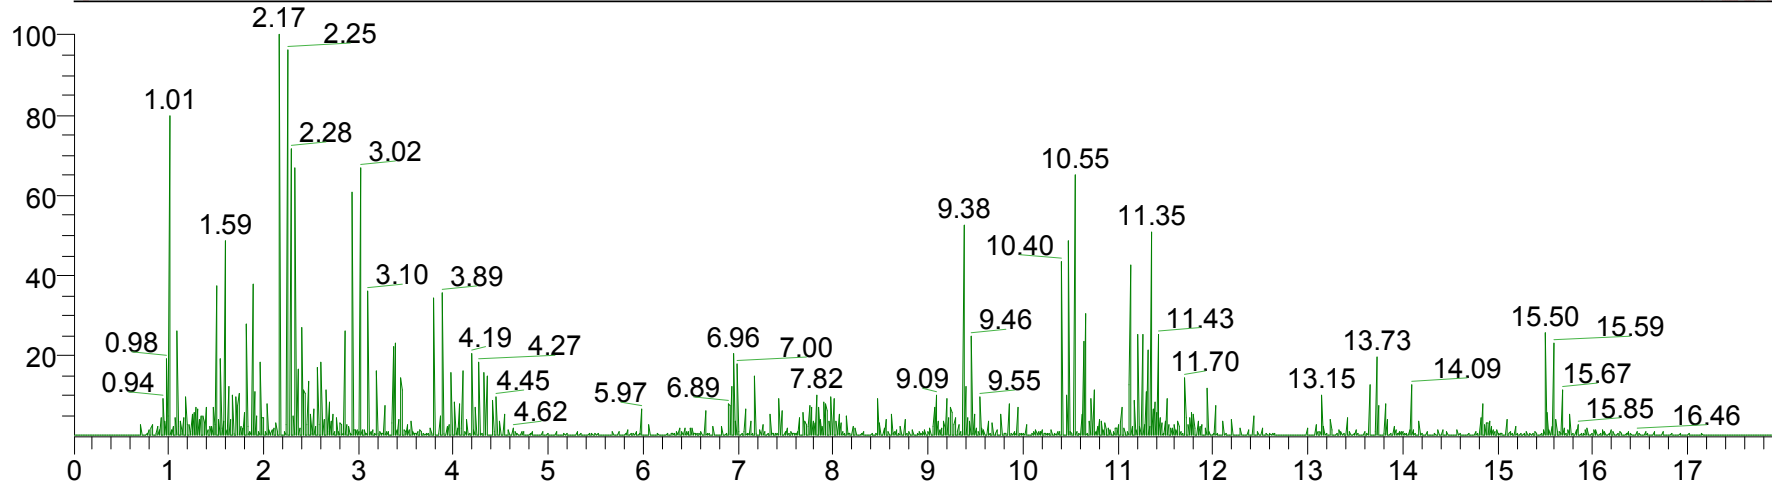

NL:  
2.26E9  
TIC F: Full ms2  
MS  
Hilic\_P\_Junti\_20  
220118\_2per\_Q  
C3

Time (min)

RT: 0.00 - 17.90

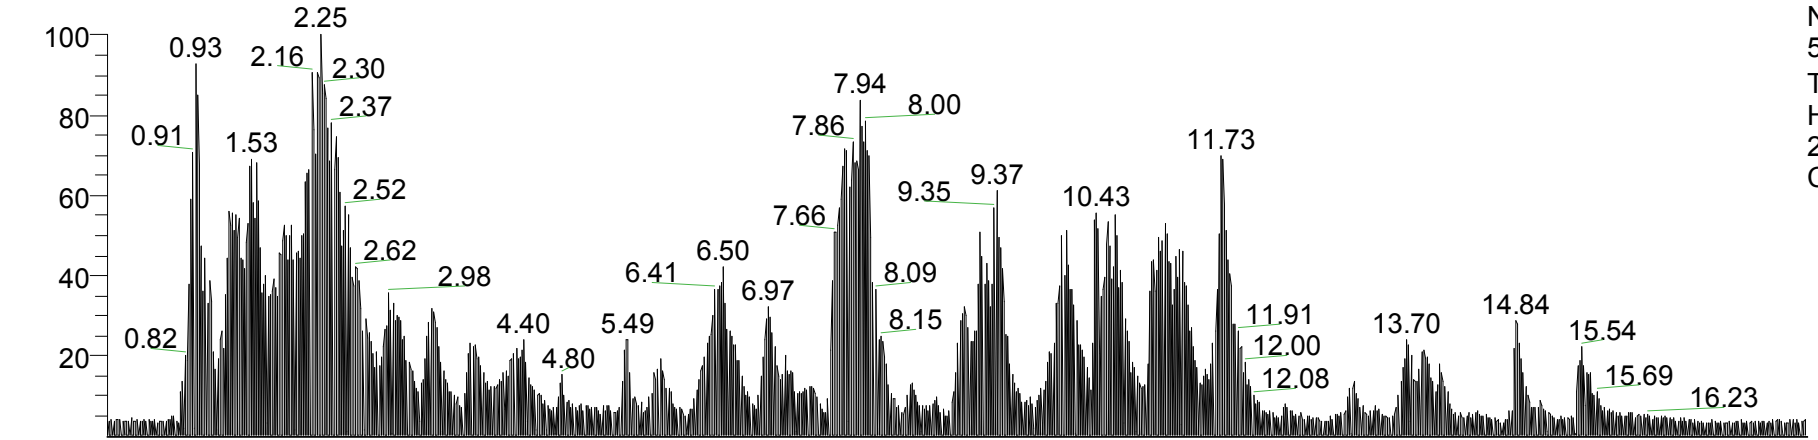

NL:  
5.92E9  
TIC MS  
Hilic\_P\_Junti\_20  
220118\_2per\_Q  
C4

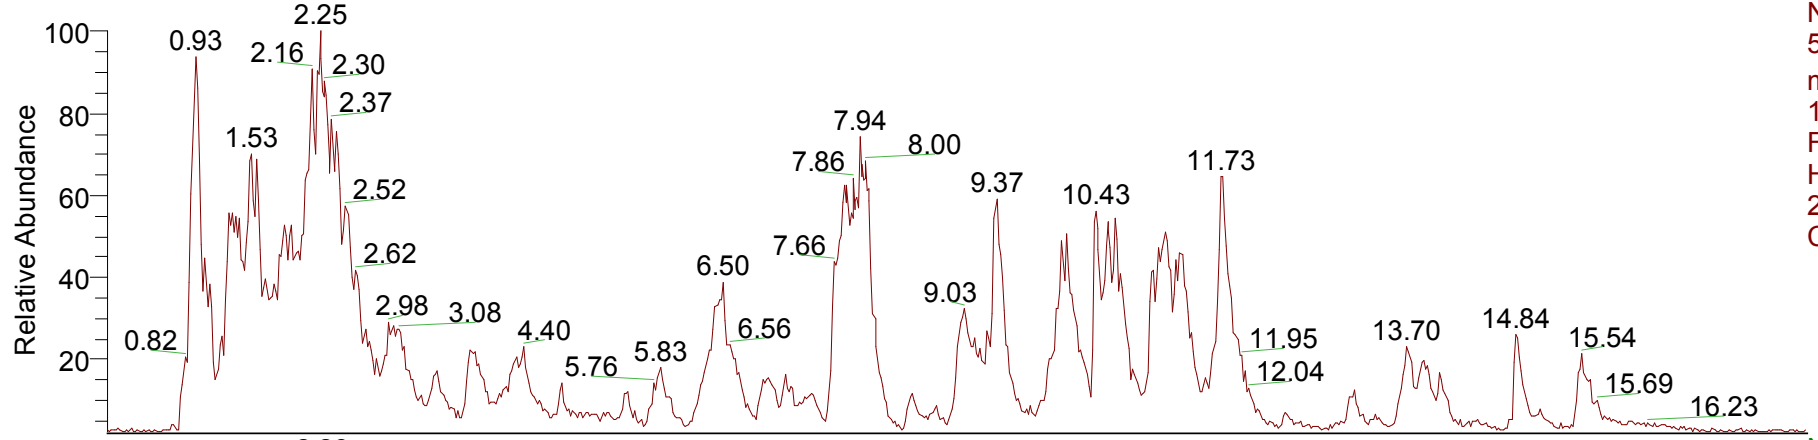

NL:  
5.65E9  
m/z=  
120.00-2000.00  
F: Full ms MS  
Hilic\_P\_Junti\_20  
220118\_2per\_Q  
C4

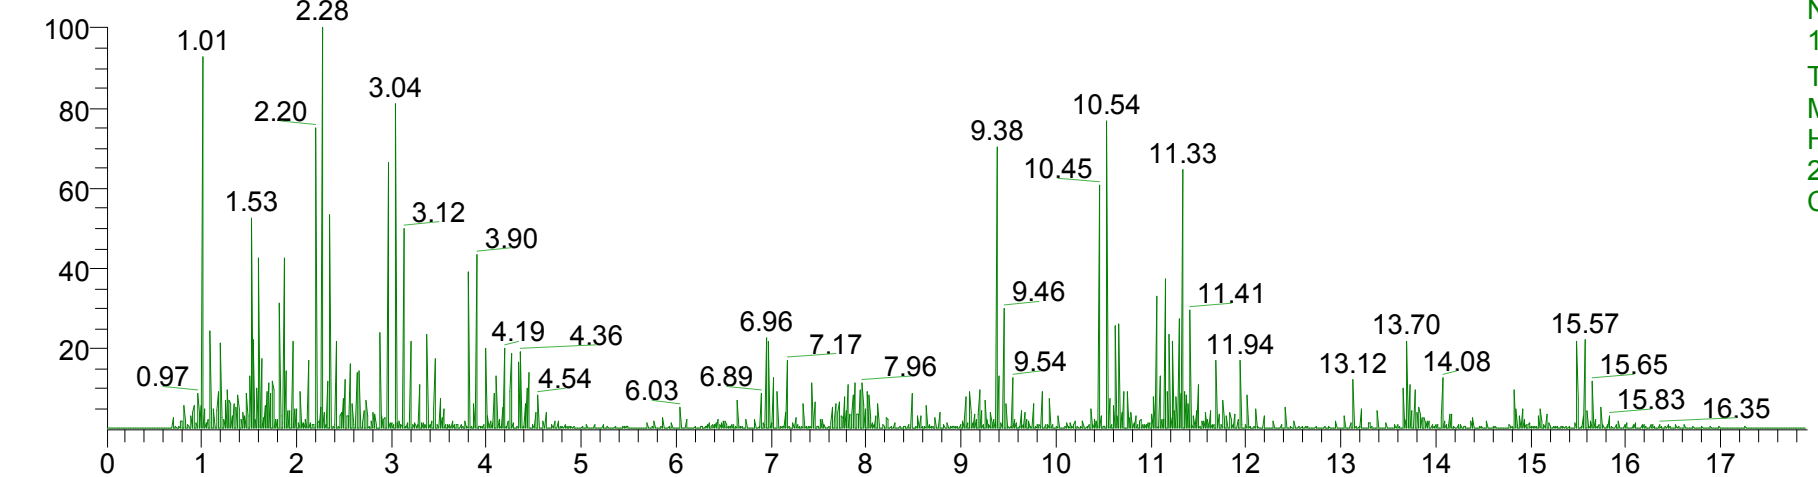

NL:  
1.98E9  
TIC F: Full ms2  
MS  
Hilic\_P\_Junti\_20  
220118\_2per\_Q  
C4

Time (min)

RT: 0.00 - 17.91

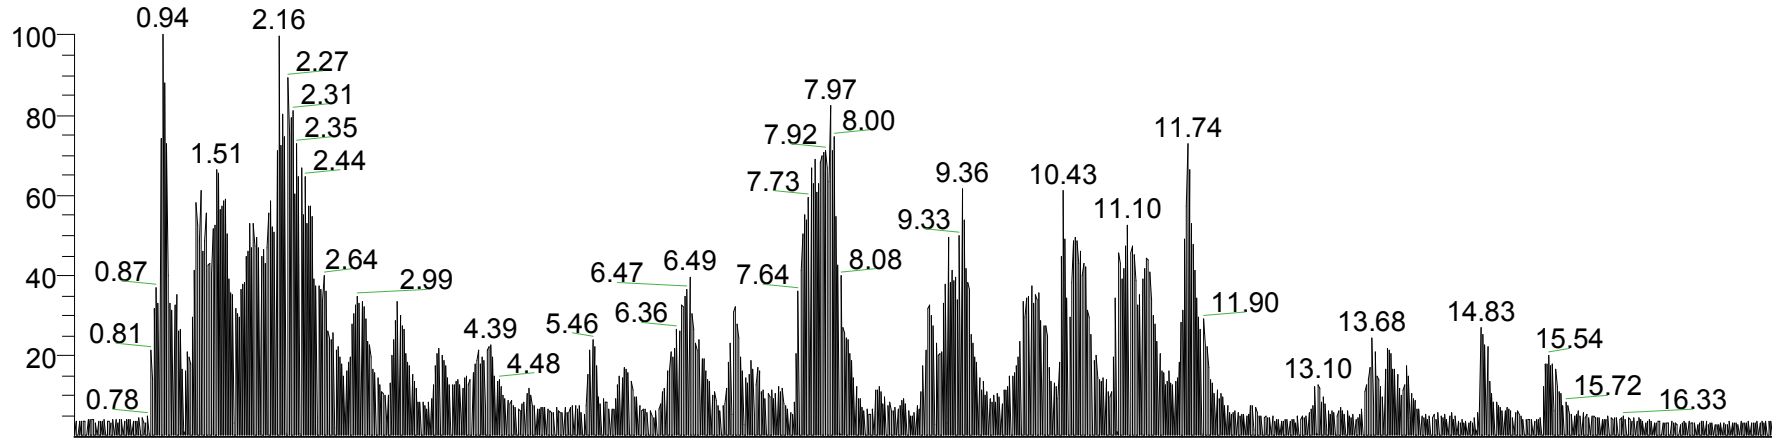

NL:  
6.13E9  
TIC MS  
Hilic\_P\_Junti\_20  
220118\_2per\_Q  
C5

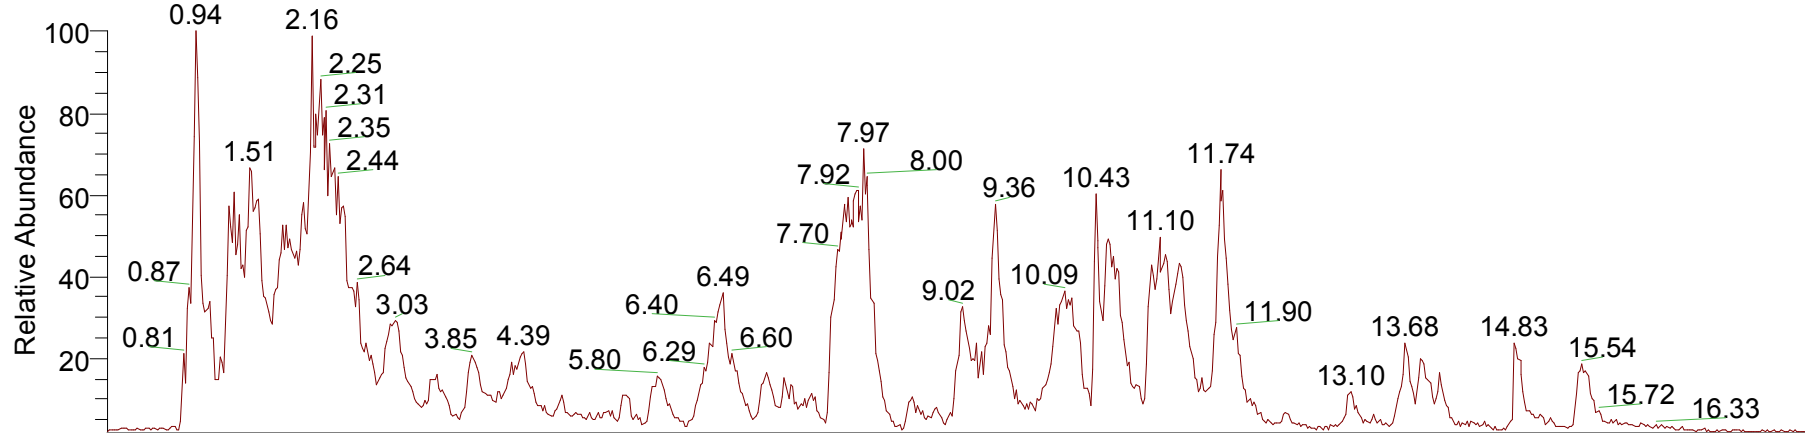

NL:  
5.91E9  
m/z=  
120.00-2000.00  
F: Full ms MS  
Hilic\_P\_Junti\_20  
220118\_2per\_Q  
C5

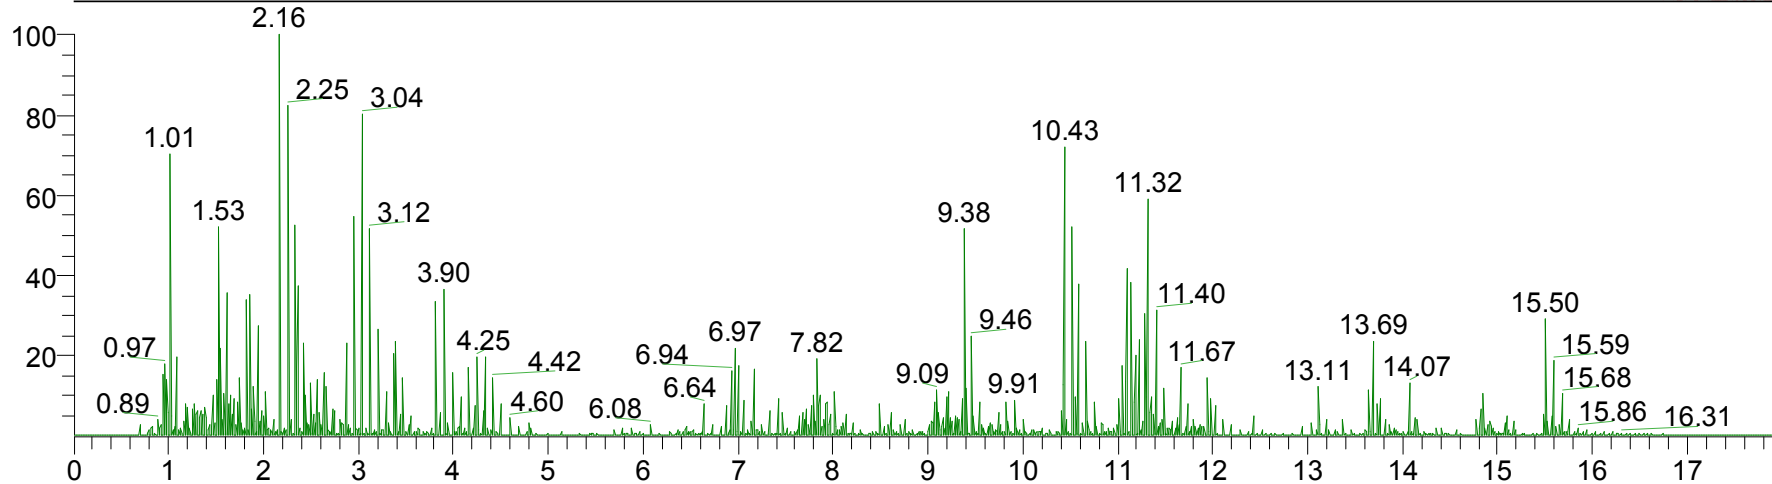

NL:  
2.05E9  
TIC F: Full ms2  
MS  
Hilic\_P\_Junti\_20  
220118\_2per\_Q  
C5

Time (min)



RT: 0.00 - 17.90

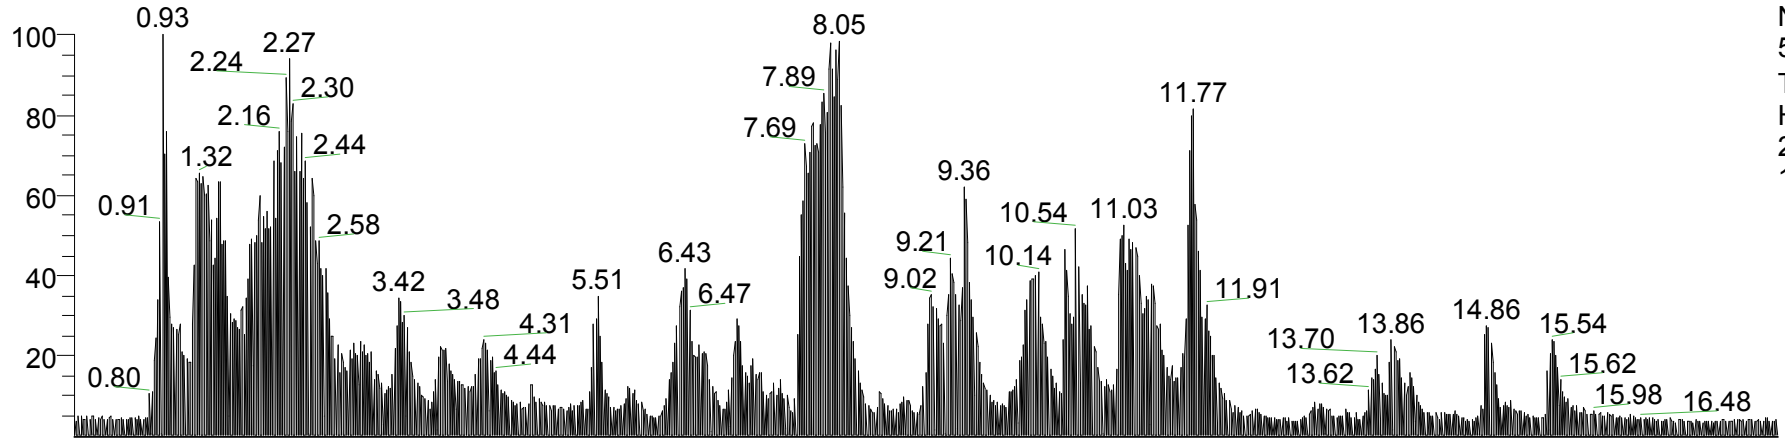

NL:  
5.29E9  
TIC MS  
Hilic\_P\_Junti\_20  
220118\_2per\_S  
1

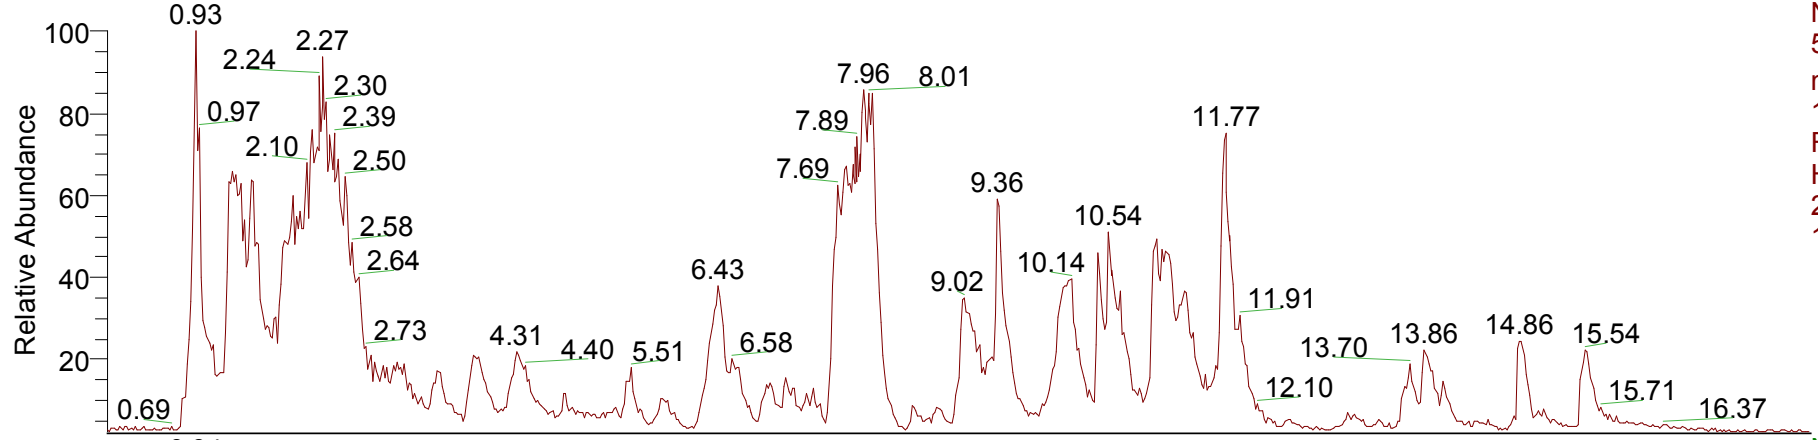

NL:  
5.06E9  
m/z=  
120.00-2000.00  
F: Full ms MS  
Hilic\_P\_Junti\_20  
220118\_2per\_S  
1

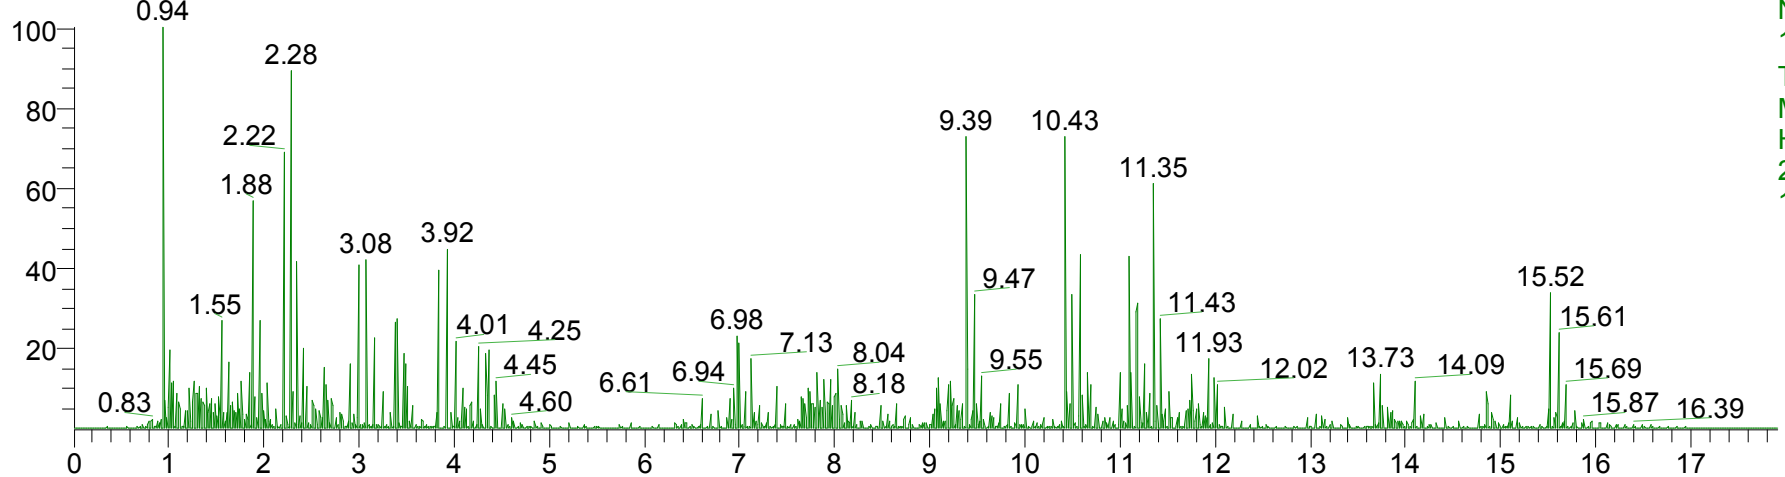

NL:  
1.63E9  
TIC F: Full ms2  
MS  
Hilic\_P\_Junti\_20  
220118\_2per\_S  
1

Time (min)

RT: 0.00 - 17.90

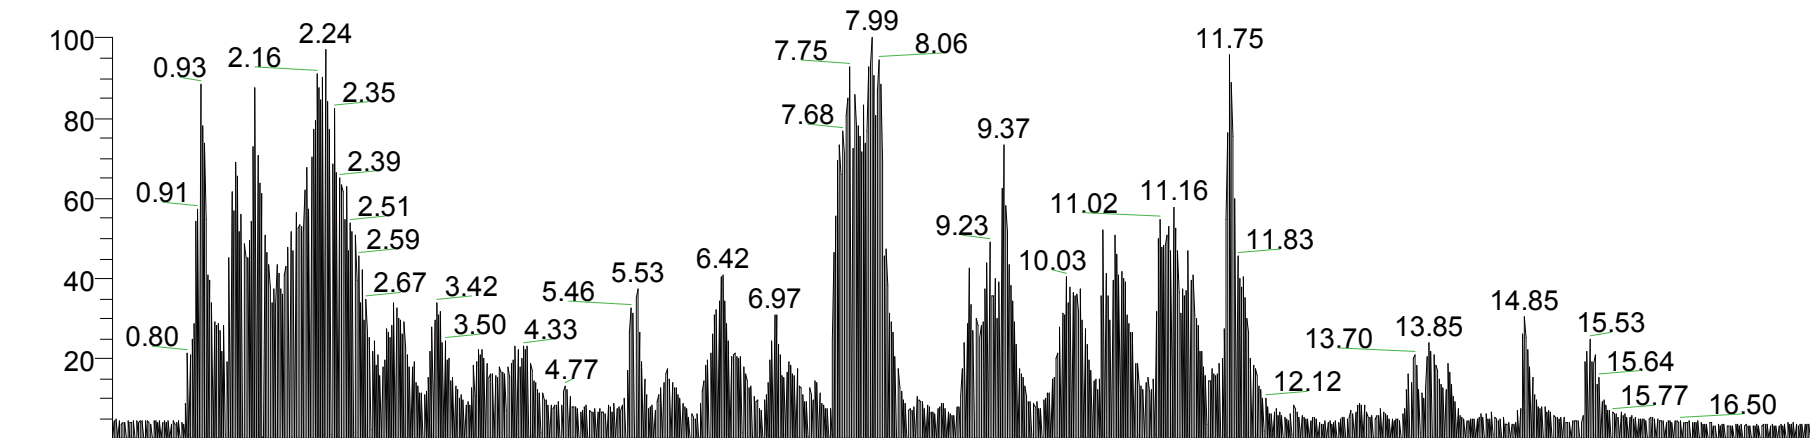

NL:  
5.49E9  
TIC MS  
Hilic\_P\_Junti\_20  
220118\_2per\_S  
2

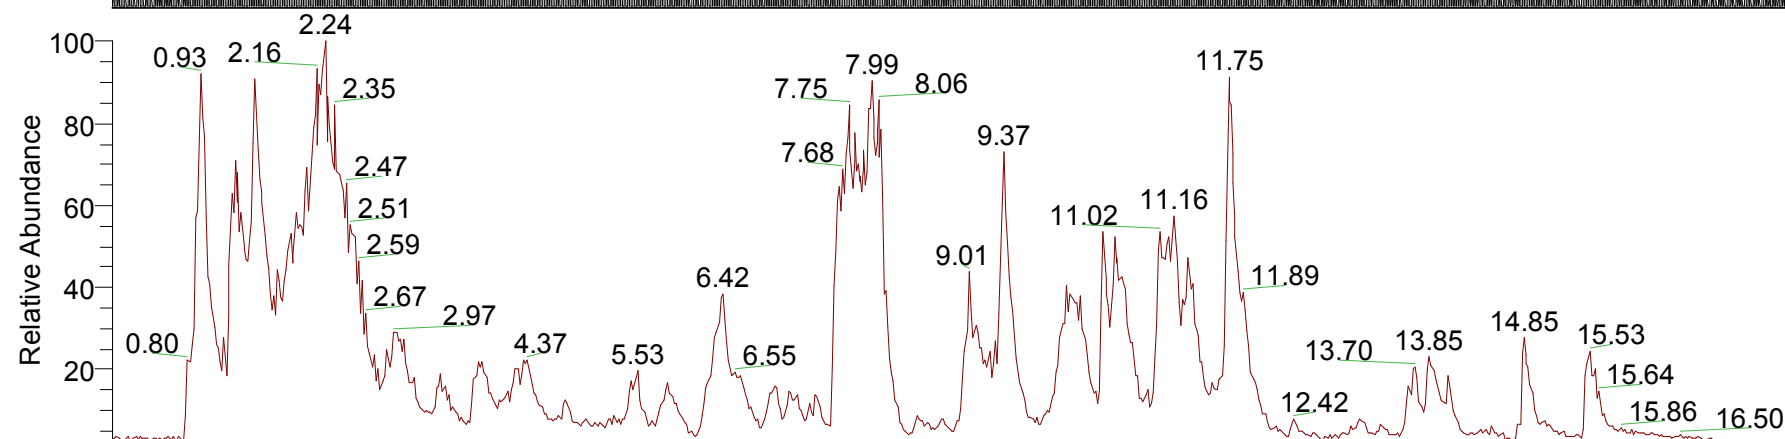

NL:  
5.10E9  
m/z=  
120.00-2000.00  
F: Full ms MS  
Hilic\_P\_Junti\_20  
220118\_2per\_S  
2

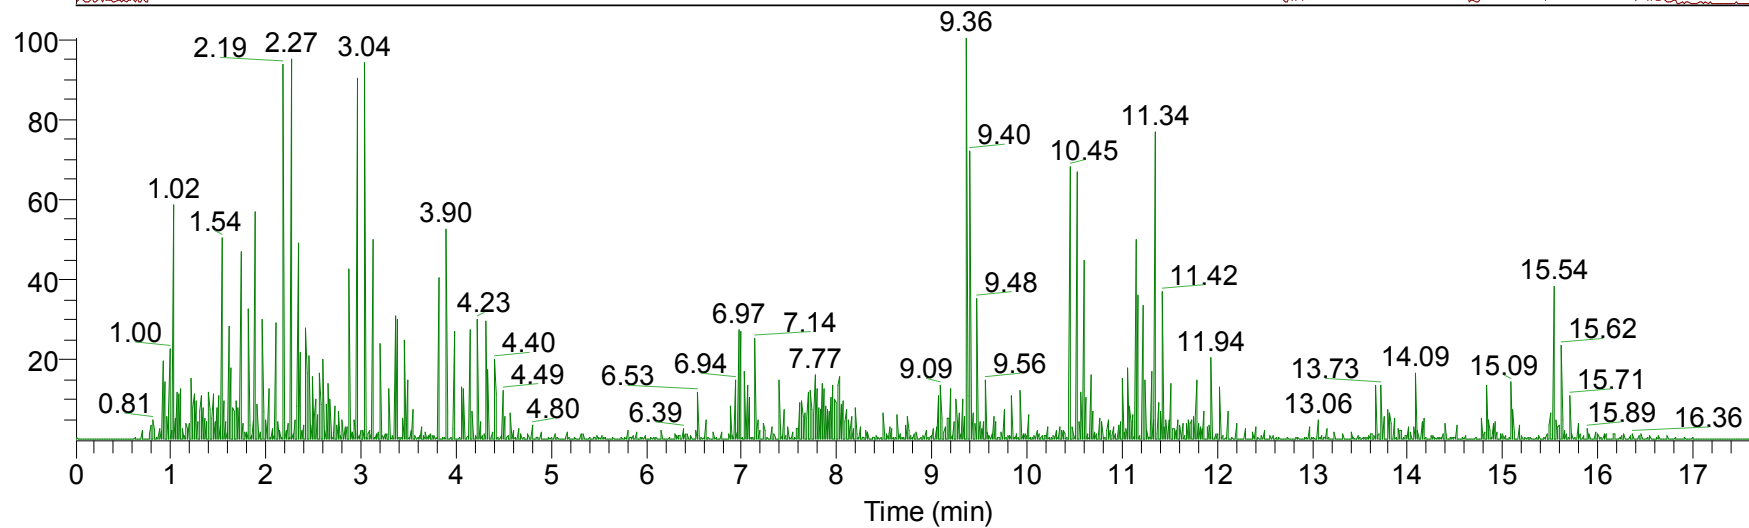

NL:  
1.43E9  
TIC F: Full ms2  
MS  
Hilic\_P\_Junti\_20  
220118\_2per\_S  
2

RT: 0.00 - 17.90

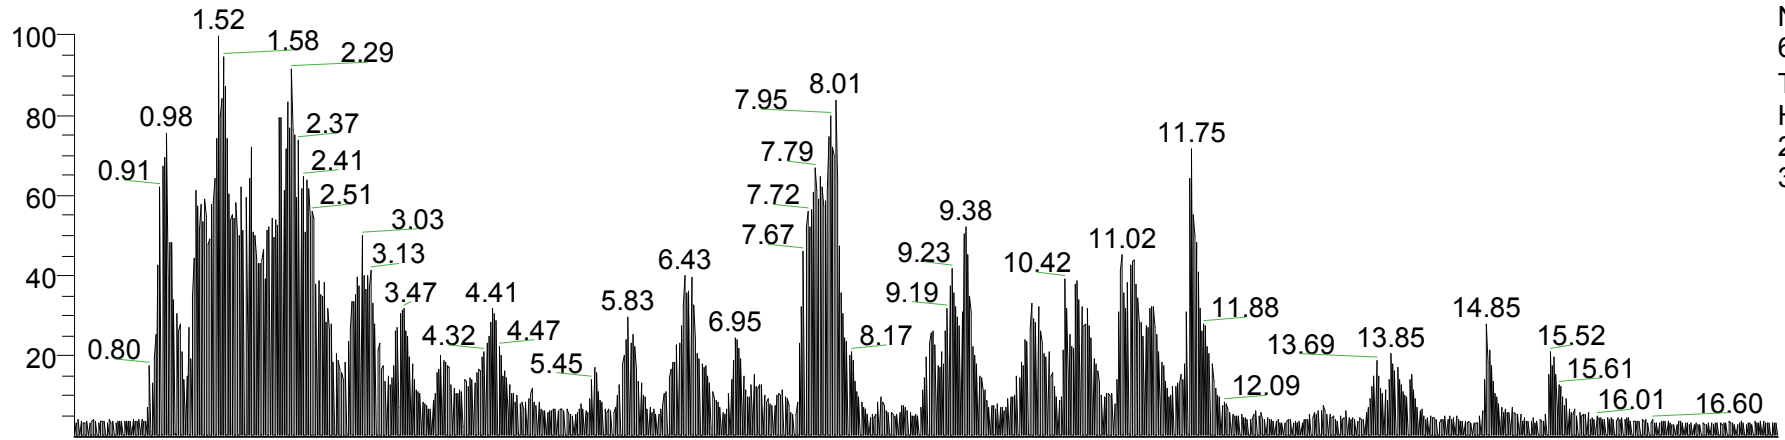

NL:  
6.37E9  
TIC MS  
Hilic\_P\_Junti\_20  
220118\_2per\_S  
3

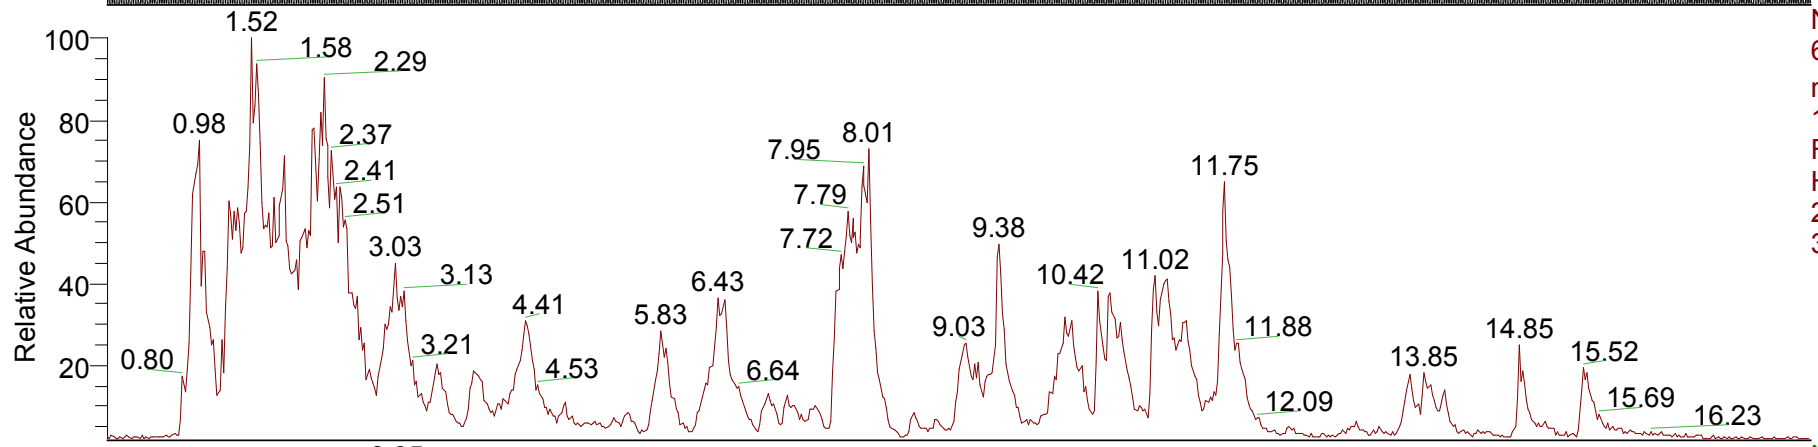

NL:  
6.18E9  
m/z=  
120.00-2000.00  
F: Full ms MS  
Hilic\_P\_Junti\_20  
220118\_2per\_S  
3

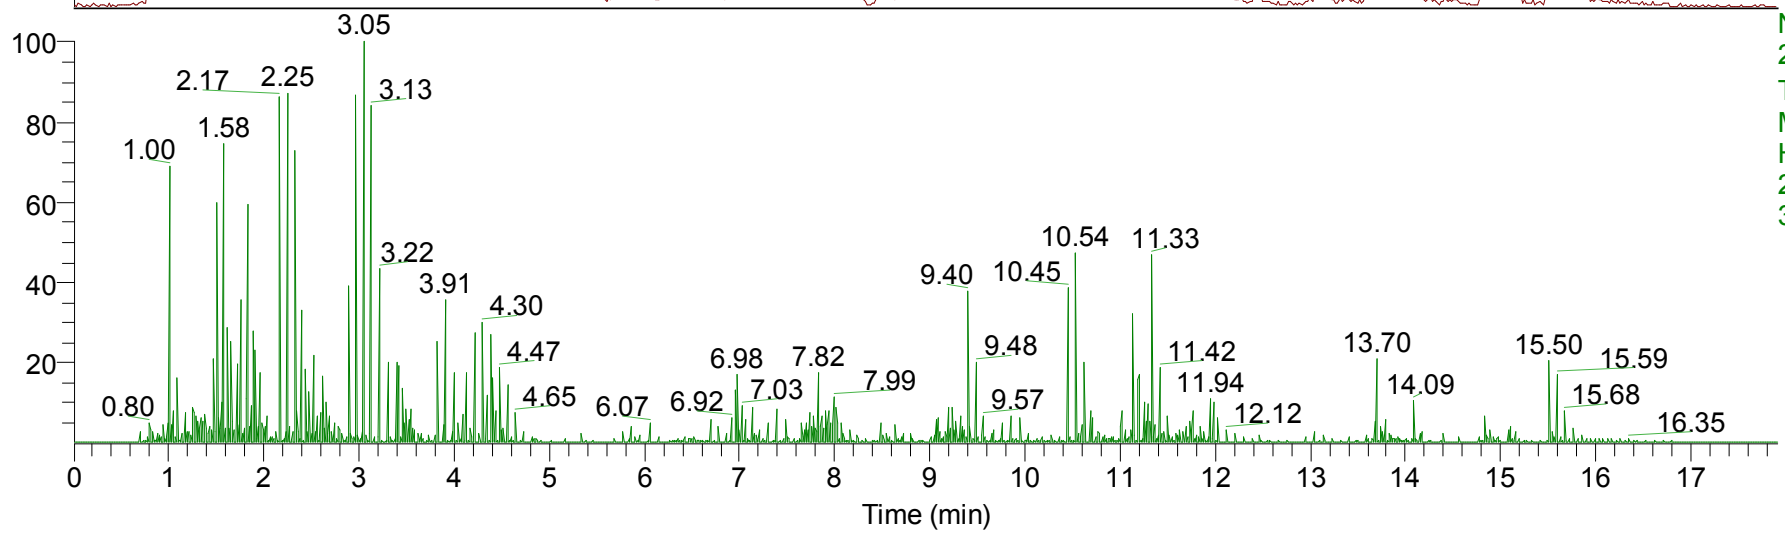

NL:  
2.30E9  
TIC F: Full ms2  
MS  
Hilic\_P\_Junti\_20  
220118\_2per\_S  
3

RT: 0.00 - 17.90

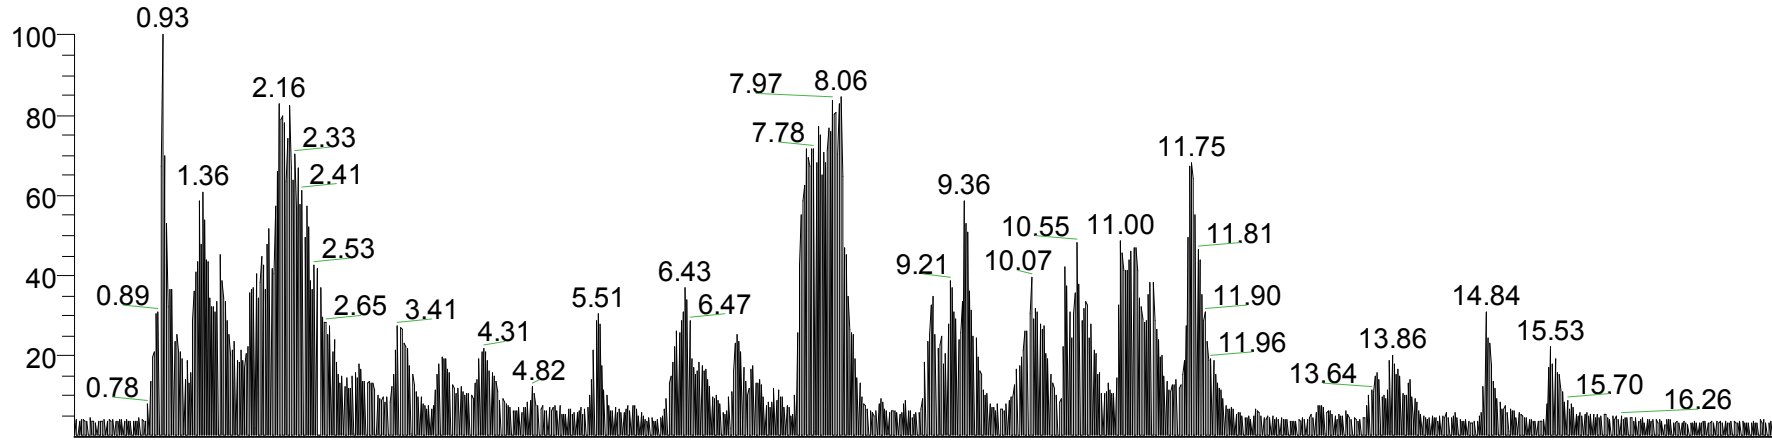

NL:  
6.03E9  
TIC MS  
Hilic\_P\_Junti\_20  
220118\_2per\_S  
4

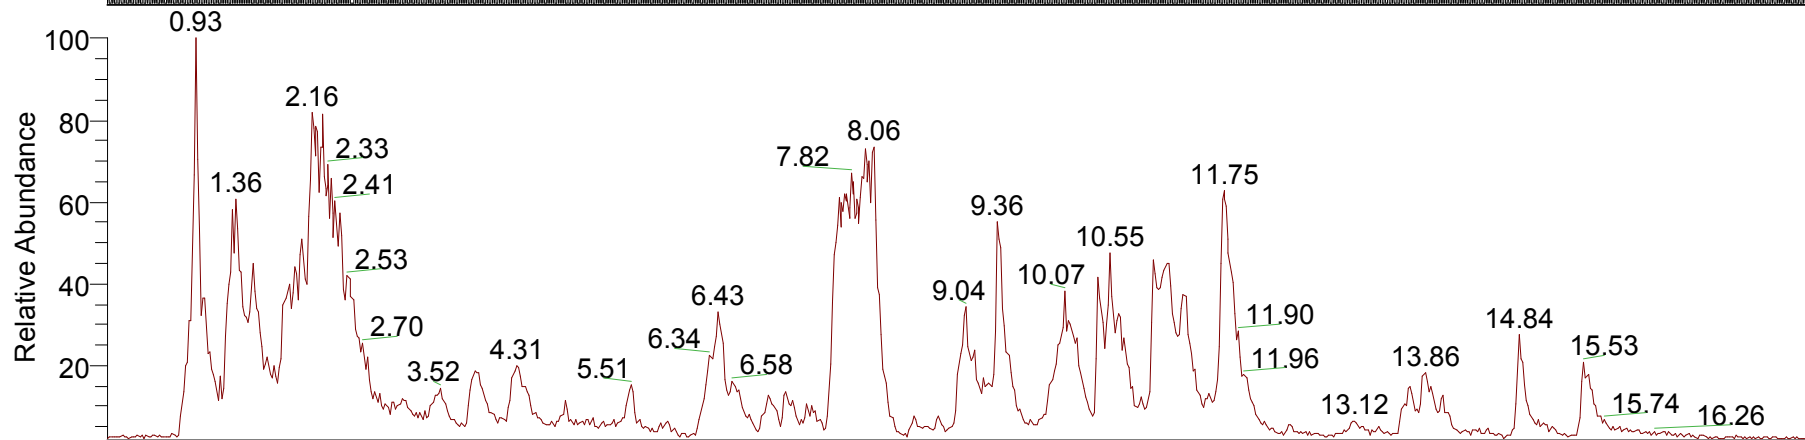

NL:  
5.82E9  
m/z=  
120.00-2000.00  
F: Full ms MS  
Hilic\_P\_Junti\_20  
220118\_2per\_S  
4

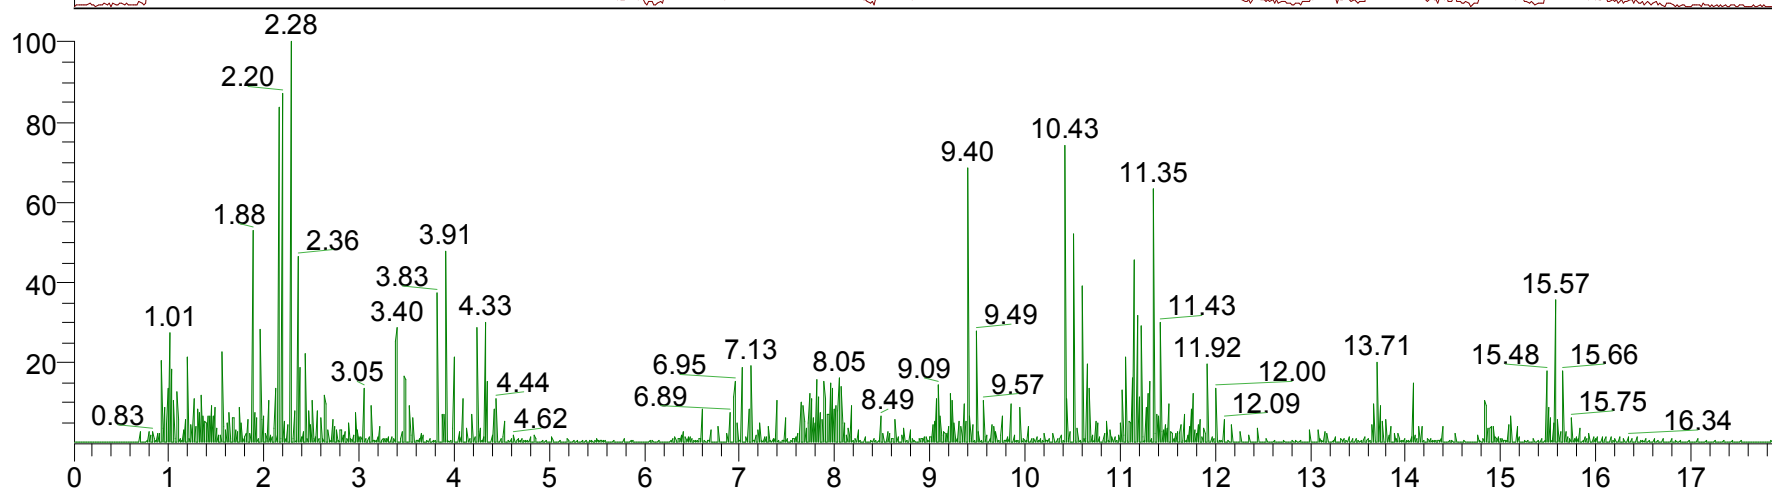

NL:  
1.47E9  
TIC F: Full ms2  
MS  
Hilic\_P\_Junti\_20  
220118\_2per\_S  
4
